# Supplementary material for: Fine Mapping of Qph9, A Major Quantitative Trait Locus, Responsible for Plant Height In Foxtail Millet [Setaria Italica (L.) P. Beauv.]
Source: Research Square preprint supplement (doi:10.21203/rs.3.rs-531496/v1), 2021-05-21
Supplement: Supplementary file 1 [file 2c6158a48ce85399e3305c09.xlsx]

## Sheet: Sheet1
Supplementary Table S2 Phenotypic analysis of 15 traits using biparents and F2 individuals
Trait	Parents		F2
	Henggu12	Changnong35	N	Mean	Range	CV	Skewness	Kurtosis
PH (cm)	43	177.1	177	120.43±49.36	15.30-192.30	40.99	-0.85	-0.88
MPL (cm)	5.64	22.08	175	21.91±10.49	1.81-39.90	47.88	-0.82	-0.86
MPD (cm)	0.87	3.54	175	2.80±1.22	0.52-5.25	42.86	-0.57	-1.02
MSD (cm)	0.25	0.97	177	0.73±0.30	0.11-1.22	41.1	-0.66	-0.89
NL (cm)	23.38	34.28	181	21.86±5.45	8.00-36.10	24.93	-0.02	-0.1
FLL (cm)	10.12	37.34	177	33.67±15.40	4.28-57.40	45.74	-0.77	-0.95
FLW (cm)	2.02	3.52	176	3.18±0.88	1.30-4.90	27.67	-0.41	-0.9
FWP (g)	6.07	156.51	174	138.44±108.97	0.79-433.03	78.71	0.59	-0.16
SWP (g)	5.57	103.77	175	90.79±70.70	0.69-275.93	77.87	0.54	-0.33
MPW (g)	0.12	41.83	172	27.60±19.33	0.04-69.20	70.03	-0.19	-1.2
MGW (g)	0.03	33.09	172	19.56±15.21	0.02-52.00	77.76	0.01	-1.36
TGW (g)	0.44	3.35	171	2.49±1.14	0.43-4.30	45.78	-0.7	-1
LNT	6	19	181	13.97±5.55	3.00-20.00	39.73	-0.95	-0.87
BNP	23	83	170	88.36±40.83	10.00-155.00	46.21	-0.83	-0.86
TN	2	1	177	1.99±1.00	1.00-5.00	50.25	0.73	0.005
LNT: leaf number of the tallest tiller; NL: neck length; MPL: main panicle length; MPD: main panicle diameter; MSD: main stem diameter; BNP: branch number per panicle; FLL: flag leaf length; FLW: flag leaf width; FWP: fresh weight per plant; SWP: straw weight per plant; MPW: main panicle weight; MGW: main grain weight; TGW: thousand-grain weight; TN: tiller number
