# Supplementary material for: Fine Mapping of Qph9, A Major Quantitative Trait Locus, Responsible for Plant Height In Foxtail Millet [Setaria Italica (L.) P. Beauv.]
Source: Research Square preprint supplement (doi:10.21203/rs.3.rs-531496/v1), 2021-05-21
Supplement: Supplementary file 2 [file 4e5b3dc395d8d57dd07d7bbf.xlsx]

## Sheet: Sheet1
Supplementary Table S8 Association analysis on MRI1016 and PH in F2 population and natural population
Location	Traits	MRI1016
		MRI1016-Henggu12	MRI1016-Changnong35
Changzhi	PH (Natural population)	156.94±19.00**	167.00±16.60**
Changzhi	PH (F2 population)	58.59±16.78**	138.42±16.69**
Yuanyang	PH (F2 population)	77.44±23.95**	149.23±13.23**
