# Supplementary material for: Fine Mapping of Qph9, A Major Quantitative Trait Locus, Responsible for Plant Height In Foxtail Millet [Setaria Italica (L.) P. Beauv.]
Source: Research Square preprint supplement (doi:10.21203/rs.3.rs-531496/v1), 2021-05-21
Supplement: Supplementary file 3 [file a793c1f708eef8b4a19cd571.xlsx]

## Sheet: Sheet1
Supplementary Table S4 Bin markers used to construct the genetic map and the genotypes of the 182 individuals
Marker name	Chromosome	Position		Hgc-4	Hgc-17	Hgc-19	Hgc-25	Hgc-35	Hgc-45	Hgc-48	Hgc-50	Hgc-60	Hgc-63	Hgc-75	Hgc-82	Hgc-84	Hgc-94	Hgc-105	Hgc-109	Hgc-110	Hgc-112	Hgc-121	Hgc-122	Hgc-124	Hgc-132	Hgc-135	Hgc-142	Hgc-143	Hgc-145	Hgc-146	Hgc-152	Hgc-154	Hgc-155	Hgc-160	Hgc-176	Hgc-187	Hgc-201	Hgc-202	Hgc-204	Hgc-205	Hgc-207	Hgc-209	Hgc-216	Hgc-218	Hgc-223	Hgc-230	Hgc-234	Hgc-236	Hgc-237
Block81	Chr.1	811903	816925	b	a	h	b	b	h	h	h	h	a	b	b	h	b	h	b	a	h	a	a	h	h	h	h	a	h	h	b	h	b	h	b	a	b	a	h	a	b	h	b	h	b	a	b	a	h
Block168	Chr.1	890928	896699	b	a	b	b	b	b	h	h	h	a	b	b	h	h	h	h	a	h	a	a	b	h	h	h	a	h	h	h	h	h	h	b	a	b	a	b	a	b	h	b	h	b	a	b	a	h
Block272	Chr.1	951512	956769	b	a	h	b	b	h	h	h	h	a	b	b	h	h	h	h	a	h	a	a	h	b	h	h	a	h	h	h	h	h	h	b	a	b	a	b	a	b	h	b	h	b	a	h	a	h
Block300	Chr.1	1082171	1179846	b	a	h	b	b	h	h	h	h	a	b	b	h	h	h	h	a	h	a	a	h	b	h	h	a	h	h	h	h	h	h	b	a	b	a	b	a	b	h	b	h	b	a	h	a	h
Block301	Chr.1	1194961	1347178	h	a	h	b	b	h	h	h	h	a	b	b	h	h	h	h	a	h	a	a	h	b	h	h	a	h	h	h	h	h	h	b	a	b	a	a	a	b	h	b	h	b	a	h	a	h
Block303	Chr.1	1366924	1426776	h	a	h	b	b	h	h	h	h	h	b	b	h	h	h	h	a	h	a	a	h	b	h	h	a	h	h	h	h	h	h	b	a	b	a	a	a	b	h	b	h	b	a	h	a	h
Block304	Chr.1	1428274	1433703	h	a	h	b	b	h	h	h	h	h	b	b	h	h	h	h	a	h	a	a	h	b	h	h	a	h	h	h	h	h	h	b	a	b	a	a	a	h	h	b	h	b	a	h	a	h
Block307	Chr.1	1442144	1493006	h	a	h	b	b	h	h	h	h	h	b	b	h	h	h	h	a	h	a	a	h	b	h	h	a	h	h	h	h	h	h	b	a	b	a	a	a	h	h	b	a	b	a	h	a	h
Block308	Chr.1	1531938	1666499	h	a	h	b	b	h	h	h	h	h	b	b	h	h	h	h	a	h	a	a	h	b	h	h	a	h	h	h	a	h	h	b	a	b	a	a	h	h	h	b	a	b	a	h	a	h
Block311	Chr.1	1686916	1702088	h	a	h	b	b	h	h	h	h	h	b	b	h	h	h	h	a	h	a	a	h	b	h	h	a	h	h	h	a	h	h	b	a	b	a	a	h	h	h	b	a	b	a	h	a	h
Block312	Chr.1	1714771	1719938	h	a	h	b	b	h	h	b	b	a	b	b	b	h	b	h	h	h	a	a	h	b	h	h	a	h	h	h	a	h	a	b	h	b	a	a	h	h	h	b	a	b	a	a	a	h
Block433	Chr.1	2412503	2435352	h	a	h	b	b	h	h	b	b	a	b	b	b	h	b	h	h	h	a	a	h	b	h	h	a	h	h	h	a	h	a	b	h	b	a	a	h	h	h	b	a	b	a	a	a	h
Block434	Chr.1	2442144	2447557	h	a	h	b	b	h	h	b	b	a	b	b	b	h	b	h	h	h	a	a	h	b	h	h	a	h	h	h	a	h	a	b	h	b	a	a	h	h	h	b	a	b	a	h	a	h
Block436	Chr.1	2454493	2474720	h	a	h	b	b	h	h	b	b	a	b	b	b	h	b	h	h	h	a	a	h	b	h	h	a	h	h	h	a	h	a	b	h	b	a	a	h	h	h	b	a	b	a	h	a	h
Block437	Chr.1	2486524	2491665	h	a	h	b	b	h	h	b	b	a	b	b	b	h	b	h	h	h	a	a	h	b	h	h	a	h	h	h	a	h	a	b	h	b	a	a	h	h	h	b	a	b	a	h	a	h
Block452	Chr.1	2503605	2533756	h	a	h	h	b	h	h	b	b	a	b	b	b	h	b	h	h	h	a	a	h	b	h	h	a	h	h	h	a	h	a	b	h	b	a	a	h	h	h	b	a	b	a	h	a	h
Block453	Chr.1	2533819	2551288	h	a	h	h	b	h	h	b	b	a	b	b	b	h	b	h	h	h	a	a	h	b	h	h	a	h	h	h	a	h	a	b	h	b	a	a	h	h	h	b	a	b	a	h	a	h
Block454	Chr.1	2623890	2629421	h	a	h	h	b	h	h	b	b	h	b	b	b	h	b	h	h	h	a	a	h	b	h	h	a	h	h	h	a	h	a	b	h	h	a	a	h	h	h	b	a	b	a	h	a	h
Block469	Chr.1	2638214	2643449	h	a	h	h	b	a	h	b	b	h	b	b	b	h	b	h	h	h	a	a	h	b	h	h	a	h	h	a	a	a	a	b	h	h	a	a	h	h	a	b	a	b	a	a	a	h
Block497	Chr.1	2663491	2699479	h	a	h	h	b	a	h	b	b	a	b	b	b	h	b	h	h	h	a	a	h	b	h	h	a	h	h	a	a	h	a	b	h	h	a	a	h	h	h	b	a	b	a	h	a	a
Block549	Chr.1	2745691	2751036	h	a	h	h	b	a	h	b	b	a	b	b	b	h	b	h	h	h	a	a	h	b	h	h	a	h	h	a	a	h	a	b	h	h	a	a	h	h	h	b	a	b	a	h	a	a
Block550	Chr.1	2752305	2759007	h	a	h	h	b	a	h	b	b	a	b	b	b	h	b	h	h	h	a	a	h	b	h	h	a	h	h	a	a	h	a	b	h	h	a	a	h	h	h	b	a	b	a	h	a	a
Block553	Chr.1	2762168	2780497	h	a	h	h	b	a	h	b	b	h	b	b	b	h	b	h	h	h	a	a	h	b	h	h	a	h	h	h	a	h	a	b	h	h	a	a	h	h	h	b	a	b	a	h	a	h
Block562	Chr.1	2840936	2854120	h	a	h	h	b	a	h	b	b	h	b	b	b	h	b	h	h	h	a	a	h	b	h	h	a	h	h	h	a	h	a	b	h	h	a	a	h	h	h	b	a	b	a	h	a	h
Block565	Chr.1	2857622	2866020	h	a	h	h	b	a	h	b	b	h	b	b	b	h	b	h	h	h	a	a	h	b	h	h	a	h	h	h	a	h	a	b	h	h	a	a	h	h	h	b	a	b	a	h	a	h
Block568	Chr.1	2906293	2913524	h	a	h	h	b	a	h	b	b	h	b	b	b	h	b	h	h	h	a	a	h	b	h	h	a	h	h	h	a	h	a	b	h	h	a	a	h	h	h	b	a	b	a	h	a	h
Block570	Chr.1	2942878	2956793	h	a	h	h	b	a	h	b	b	h	b	b	b	h	b	h	h	h	a	a	h	b	h	h	a	a	h	h	a	h	a	b	h	h	a	a	a	h	h	b	a	b	a	h	a	h
Block655	Chr.1	3074868	3080689	h	a	a	h	b	a	h	b	b	h	b	b	b	h	b	a	h	h	a	a	h	b	h	h	a	h	h	h	a	h	a	b	h	h	a	a	h	h	h	b	a	b	a	h	a	h
Block676	Chr.1	3107915	3117537	h	a	a	h	b	a	h	b	b	h	b	b	b	h	b	h	h	h	a	a	h	b	h	h	a	h	h	h	a	h	a	b	h	h	a	a	h	h	h	b	a	b	a	h	a	h
Block681	Chr.1	3119294	3125227	h	a	a	h	b	a	h	b	b	a	b	b	b	h	b	a	h	h	a	a	h	b	h	a	a	a	h	h	a	a	a	b	h	h	a	a	h	h	h	b	a	b	a	h	a	h
Block755	Chr.1	3224736	3233904	h	a	a	h	b	a	h	b	b	h	b	b	b	h	b	h	h	h	a	a	h	b	h	h	a	a	h	h	a	h	a	b	h	h	a	a	h	h	h	b	a	b	a	h	a	h
Block820	Chr.1	3266518	3274993	h	a	a	h	b	a	h	b	b	h	b	b	b	h	b	h	h	h	a	a	h	b	h	h	a	a	h	h	a	h	a	b	h	h	a	a	h	h	h	b	a	b	a	h	a	h
Block856	Chr.1	3291380	3306489	h	a	a	h	b	a	h	b	b	h	b	b	b	h	b	h	h	h	a	a	h	b	h	h	a	a	h	h	a	h	a	b	h	h	a	a	h	h	h	b	a	b	a	h	a	h
Block857	Chr.1	3306577	3340162	h	a	a	h	b	a	h	b	b	h	b	b	b	h	b	h	h	h	a	a	h	b	h	h	a	a	h	h	a	h	a	b	h	h	a	a	h	h	h	b	a	b	a	h	a	h
Block858	Chr.1	3343039	3370649	h	a	a	h	b	a	h	b	b	h	b	b	b	h	b	h	h	h	a	a	h	b	h	h	a	a	h	h	a	h	a	h	h	h	a	a	h	h	h	b	a	b	a	h	a	h
Block860	Chr.1	3377993	3395546	h	a	a	h	b	a	h	b	b	h	b	b	b	a	b	h	h	h	a	a	h	b	h	h	a	a	h	h	a	h	a	h	h	h	a	a	h	h	h	h	a	b	a	h	a	h
Block868	Chr.1	3462321	3494506	h	a	a	h	b	a	h	b	b	h	b	b	b	a	b	h	h	h	a	a	h	b	h	h	a	a	h	h	a	h	a	h	h	h	a	a	h	h	h	h	a	b	a	h	a	h
Block870	Chr.1	3507842	3516993	h	a	a	h	b	a	h	b	b	h	b	b	b	a	b	h	h	h	a	a	h	b	h	h	a	a	h	h	a	h	a	h	h	h	a	a	h	h	h	h	a	b	a	h	a	h
Block871	Chr.1	3530904	3568468	h	a	a	h	b	a	h	b	b	h	b	b	b	a	b	h	h	h	a	a	h	b	h	h	a	a	h	h	a	h	a	h	h	h	a	a	h	h	h	h	a	b	a	h	a	h
Block873	Chr.1	3584929	3749119	h	a	a	h	b	a	h	b	b	a	b	b	b	a	b	a	h	h	a	a	h	b	h	a	a	a	h	h	a	h	a	h	h	a	a	a	h	h	h	h	a	b	a	h	a	h
Block902	Chr.1	3778271	3785067	a	a	a	h	b	a	h	b	b	h	b	b	b	a	b	h	h	h	a	a	h	b	h	h	a	a	a	h	a	h	a	h	h	a	a	a	h	h	h	h	a	b	a	h	a	h
Block930	Chr.1	3806051	3814353	h	a	a	h	b	a	h	b	b	h	b	b	b	a	b	h	h	h	a	a	h	b	h	h	a	a	a	h	a	h	a	h	h	h	a	a	b	h	h	h	a	b	a	h	a	h
Block1197	Chr.1	4028930	4035384	b	a	a	h	b	a	a	b	b	h	b	b	b	a	b	a	h	h	a	a	h	b	h	h	a	a	h	h	a	a	a	h	h	h	a	a	b	h	h	h	a	b	a	h	a	h
Block1212	Chr.1	4047845	4053140	b	a	a	h	b	a	h	b	h	a	b	b	b	a	b	a	h	h	a	a	h	b	h	h	a	a	h	h	a	h	a	h	h	a	a	a	b	h	h	h	a	b	a	h	a	h
Block1244	Chr.1	4088526	4112073	b	a	a	h	b	a	h	b	h	a	b	b	b	a	b	a	h	h	a	a	h	b	h	h	a	a	h	h	a	h	a	h	h	a	a	a	b	h	h	h	a	b	a	h	a	h
Block1245	Chr.1	4117184	4127489	b	a	a	h	b	a	h	b	h	a	b	b	b	a	b	h	h	h	a	a	h	b	h	h	a	a	h	h	a	h	a	h	h	a	a	a	b	h	h	h	a	b	a	h	a	h
Block1250	Chr.1	4193342	4229313	b	a	a	h	b	a	h	b	h	a	b	b	b	a	b	h	h	h	a	a	h	b	h	h	a	a	h	h	a	h	a	h	h	a	a	a	b	h	h	h	a	b	a	h	a	h
Block1251	Chr.1	4341598	4347763	b	a	a	h	b	a	h	b	h	a	b	b	b	a	b	h	h	h	a	a	h	h	h	h	a	a	h	h	a	h	a	h	h	a	a	a	b	h	h	h	a	b	a	h	a	h
Block1252	Chr.1	4357201	4385521	b	a	a	h	b	a	h	b	h	a	b	b	b	a	b	h	h	h	a	a	h	h	h	h	a	a	h	h	a	h	a	h	h	a	a	a	b	h	h	h	a	b	a	h	a	h
Block1253	Chr.1	4415664	4479348	b	a	a	h	b	a	h	b	h	a	b	b	b	a	b	h	h	h	a	a	h	h	h	h	a	a	h	h	a	h	a	h	h	a	a	a	b	h	h	h	a	b	a	h	a	h
Block1254	Chr.1	4507151	4588501	b	a	a	h	b	a	h	b	h	b	b	b	b	a	b	b	h	h	b	a	a	b	a	h	h	a	h	b	a	h	a	h	h	b	a	a	h	h	h	h	a	b	h	h	a	h
Block1450	Chr.1	7305481	7312728	b	a	a	h	a	a	h	b	h	b	b	b	b	a	b	b	h	h	b	a	a	b	a	h	h	a	h	b	a	h	a	h	h	b	a	a	a	h	h	h	a	b	a	h	a	h
Block1471	Chr.1	7339221	7345798	b	a	a	h	a	a	h	b	h	b	b	b	b	a	b	b	h	h	b	a	a	b	a	h	h	a	h	b	a	h	a	h	a	b	a	a	h	a	h	h	a	b	a	h	a	h
Block1478	Chr.1	7358953	7365341	b	a	a	h	h	a	h	b	h	b	b	b	b	a	b	b	h	h	b	a	a	b	a	h	h	a	h	b	a	h	a	h	h	b	a	a	h	h	h	h	a	b	h	h	a	h
Block1527	Chr.1	7405488	7421369	b	a	a	h	h	a	h	b	h	b	b	b	b	a	b	b	h	h	b	a	a	b	a	h	h	a	h	b	a	h	a	h	h	b	a	a	h	h	h	h	a	b	h	h	a	h
Block1547	Chr.1	7435447	7444169	b	a	a	h	h	a	h	b	h	b	b	b	b	a	b	b	h	h	b	a	a	b	a	h	h	a	h	b	a	h	a	h	h	b	a	a	h	a	h	h	a	b	h	h	a	a
Block1558	Chr.1	7452149	7466887	b	a	a	h	h	a	h	b	h	b	b	b	b	a	b	b	h	h	b	a	a	b	a	h	h	a	h	b	a	h	a	h	h	b	a	a	h	a	h	h	a	b	h	h	a	a
Block1562	Chr.1	7467242	7473364	b	a	a	h	h	a	h	b	h	b	b	b	b	a	b	b	h	h	b	a	a	b	a	h	h	a	h	b	a	h	a	a	a	b	a	a	h	h	h	h	a	b	a	h	a	h
Block1613	Chr.1	7536614	7553772	b	a	a	h	h	a	h	b	h	b	b	b	b	a	b	b	h	h	b	a	a	b	a	h	h	a	h	b	a	h	a	a	h	b	a	a	h	h	h	a	a	b	h	h	a	h
Block1677	Chr.1	7609879	7624139	b	a	a	h	h	a	h	b	h	b	b	b	b	a	h	b	h	h	b	a	a	b	a	h	h	a	h	b	a	h	a	h	h	b	a	a	h	h	h	h	a	b	h	h	a	h
Block1684	Chr.1	7629075	7634891	b	h	a	h	h	a	h	b	a	b	b	b	b	a	h	b	h	h	b	a	a	b	a	h	h	a	h	b	a	h	a	h	h	b	a	a	h	h	h	h	a	b	h	h	a	h
Block1686	Chr.1	7718235	7738080	b	h	h	h	h	a	h	b	a	b	b	b	b	a	h	b	h	h	b	a	a	b	a	h	h	a	h	b	a	h	a	h	h	b	a	a	h	h	h	h	a	b	h	a	a	h
Block1690	Chr.1	7870264	7883658	b	h	h	h	h	a	a	b	a	b	b	b	b	a	h	b	h	h	b	a	a	b	a	h	h	a	h	b	a	h	a	h	h	b	a	a	h	h	h	h	a	b	h	a	a	h
Block1691	Chr.1	7884986	7934549	b	h	h	h	h	a	a	b	a	b	b	b	b	a	h	b	h	h	b	a	a	b	a	h	h	a	h	b	a	h	a	h	h	b	a	a	h	h	h	h	a	b	h	a	a	h
Block1692	Chr.1	7942473	7985813	b	h	h	a	h	a	a	b	a	b	b	b	b	a	h	b	h	h	b	a	a	b	a	h	h	a	a	b	a	h	a	h	h	b	a	a	h	h	h	h	a	b	h	a	a	h
Block1693	Chr.1	8006051	8130983	b	h	h	a	h	a	a	b	a	b	h	b	b	a	h	b	h	h	b	a	a	b	a	h	h	a	a	b	a	h	a	h	h	b	a	a	h	h	h	h	a	b	h	a	a	h
Block1696	Chr.1	8175312	8181235	b	h	h	a	h	a	a	b	a	b	h	b	b	a	h	b	h	h	b	a	a	b	a	h	h	a	a	b	a	h	a	h	h	b	a	a	h	h	h	h	a	b	h	a	a	h
Block1697	Chr.1	8195745	8225715	b	h	h	a	h	a	a	b	a	b	h	b	b	a	h	b	h	h	b	a	a	b	a	h	h	a	a	b	a	h	a	h	h	b	a	a	h	h	h	h	a	b	h	a	a	h
Block1699	Chr.1	8274620	8312164	b	h	h	a	h	a	a	b	a	b	h	b	b	a	h	b	h	h	b	a	a	b	a	h	h	a	a	b	a	h	a	h	h	b	a	a	h	h	h	h	a	b	h	a	a	h
Block1700	Chr.1	8386209	8416455	b	h	h	a	h	a	a	b	a	b	h	b	b	h	h	b	h	h	b	a	a	b	a	h	h	a	a	b	a	h	a	h	h	b	a	a	h	h	h	h	a	b	h	a	a	h
Block1701	Chr.1	8428468	8449582	b	h	h	a	h	a	a	b	a	b	h	b	b	h	h	b	h	h	b	a	a	b	a	h	a	a	a	b	a	h	a	h	h	b	a	a	h	h	h	h	a	b	h	a	a	h
Block1702	Chr.1	8451578	8575999	b	h	h	a	h	a	a	b	a	b	h	b	b	h	h	b	h	h	b	a	a	b	a	h	a	a	a	b	a	h	a	h	h	b	a	a	h	h	h	h	a	b	h	h	a	h
Block1703	Chr.1	8577913	8594116	b	h	h	a	h	a	a	b	a	b	h	b	b	h	h	b	h	h	b	a	a	b	a	h	a	a	a	b	a	h	a	h	h	b	a	a	h	h	h	h	a	b	h	h	a	h
Block1704	Chr.1	8595328	8602209	b	h	h	a	h	a	a	b	a	b	h	b	b	h	h	b	h	h	b	a	a	b	a	h	a	a	a	b	a	h	a	h	h	b	a	a	h	h	h	h	a	b	h	h	a	h
Block1706	Chr.1	8626409	8633029	b	h	h	a	h	a	a	b	a	b	h	h	b	h	h	b	h	h	b	a	a	b	a	h	a	a	a	b	a	h	a	h	b	b	a	a	h	a	h	b	a	b	h	h	a	h
Block1860	Chr.1	8777102	8786296	b	h	h	a	h	a	a	b	a	b	h	h	b	h	h	b	h	h	b	a	a	b	a	h	a	a	a	b	a	h	a	h	h	b	a	a	h	a	h	b	a	b	h	h	a	h
Block1870	Chr.1	8797468	8868675	b	h	h	a	h	a	a	b	a	b	h	h	b	h	h	b	h	h	b	a	a	b	a	h	a	a	a	b	a	h	a	h	h	b	a	a	h	a	h	b	a	b	h	h	a	h
Block1871	Chr.1	8869315	9525662	b	h	h	a	h	a	a	b	a	b	h	h	b	h	h	b	h	h	b	a	a	b	a	h	a	a	a	b	a	h	a	h	h	b	a	a	h	a	h	b	a	b	b	h	a	h
Block1872	Chr.1	9530040	9556851	b	h	h	a	h	a	a	b	a	b	h	h	b	h	h	b	h	h	b	a	a	b	a	h	a	a	a	b	a	h	a	h	b	b	a	a	h	a	h	b	a	b	b	h	a	h
Block1873	Chr.1	9559115	9571125	b	h	h	a	h	a	a	b	a	b	h	h	b	h	h	b	h	h	b	a	a	b	a	h	a	a	a	b	a	h	a	h	b	b	a	a	h	a	h	b	a	b	b	h	a	h
Block1874	Chr.1	9571146	9596706	b	h	h	a	h	a	a	b	a	b	h	h	b	h	h	b	h	h	b	a	a	b	a	h	a	a	a	b	a	h	a	h	h	b	a	a	h	a	h	b	a	b	b	h	a	h
Block1876	Chr.1	9602133	9613106	b	h	h	a	h	a	a	b	a	b	h	h	b	h	h	b	h	h	b	a	a	b	a	h	a	a	a	b	a	h	a	h	h	b	a	a	h	a	h	b	a	b	h	h	a	h
Block1877	Chr.1	9613238	9618783	b	h	h	a	h	a	a	b	a	b	h	h	b	h	h	b	h	h	b	a	a	b	a	h	a	a	a	b	a	h	a	h	h	b	a	a	h	a	h	b	a	b	h	h	a	h
Block1879	Chr.1	9619093	9624340	b	h	h	a	h	a	a	b	a	b	h	h	b	h	h	b	h	h	b	a	a	b	a	h	a	a	a	b	a	h	a	h	h	b	a	a	h	a	h	b	a	b	h	h	a	h
Block1895	Chr.1	9669122	9689362	b	h	h	a	h	a	a	b	a	b	h	h	b	h	h	b	h	h	b	a	a	b	a	h	a	a	a	b	a	h	a	h	h	b	a	a	h	a	h	b	a	b	h	h	a	h
Block1944	Chr.1	9750264	9761471	b	h	h	a	h	a	a	b	a	b	h	h	b	h	h	b	h	h	b	a	a	b	a	h	a	a	a	b	a	h	a	h	h	b	a	a	h	a	h	b	a	b	h	h	a	h
Block1946	Chr.1	9763989	9769662	b	h	h	a	h	a	a	b	a	b	h	h	b	h	h	b	h	h	b	a	a	b	a	h	a	a	a	b	a	h	a	h	h	b	a	a	h	a	h	b	a	b	h	h	a	h
Block1947	Chr.1	9769923	9775096	b	h	h	a	h	a	a	b	a	b	h	h	b	h	h	b	h	h	b	a	a	b	a	h	a	a	a	b	a	h	a	h	h	b	a	a	h	a	h	b	a	b	h	h	a	h
Block1948	Chr.1	9775201	9783084	b	h	h	a	h	a	a	b	a	b	h	h	b	h	h	b	h	h	b	a	a	b	a	h	a	a	a	b	a	h	a	h	h	b	a	a	h	a	h	b	a	b	h	b	a	h
Block1951	Chr.1	9784769	9790391	b	h	h	a	h	a	a	b	a	b	h	h	b	h	h	b	h	h	b	a	a	b	a	h	a	a	a	b	a	h	a	h	h	b	a	a	h	a	h	b	a	b	h	h	a	h
Block1954	Chr.1	9800402	9827434	b	h	h	a	h	a	a	b	a	b	h	h	b	h	h	b	h	h	b	a	a	b	a	h	a	a	a	b	a	h	a	h	h	b	a	a	h	a	h	b	a	b	h	h	a	h
Block1955	Chr.1	9828355	9898280	b	h	h	a	a	a	a	b	a	b	h	h	b	h	h	b	h	h	b	a	a	b	a	h	a	a	a	b	a	b	a	h	h	b	a	a	h	a	h	b	a	b	h	h	a	h
Block1959	Chr.1	9904514	9912507	b	h	h	a	a	a	a	b	a	b	h	h	b	h	h	b	h	h	b	a	a	b	a	h	a	a	a	b	a	h	a	h	h	b	a	a	b	a	h	b	a	b	h	h	a	h
Block1980	Chr.1	9947207	9958575	b	h	h	a	a	a	a	b	a	b	h	h	b	h	h	b	h	h	b	a	a	b	a	h	a	a	a	b	a	h	a	h	h	b	a	a	h	a	h	b	a	b	h	h	a	h
Block1981	Chr.1	9958745	9982253	b	h	h	a	a	a	a	b	a	b	b	h	b	h	h	b	h	h	b	a	a	b	a	h	a	a	a	b	a	h	a	h	h	b	a	a	h	a	h	b	a	b	h	h	a	h
Block1982	Chr.1	9982599	9991319	b	h	h	a	a	a	a	b	a	b	b	h	b	h	h	b	h	h	b	a	a	b	a	h	a	a	a	b	a	h	a	h	h	b	a	a	h	a	b	b	a	b	h	h	a	h
Block1983	Chr.1	9991828	9998513	b	h	h	a	a	a	a	b	a	b	b	h	b	h	h	b	h	h	b	a	a	b	a	h	a	a	a	b	a	h	a	h	h	b	a	a	h	a	b	b	a	b	h	h	a	b
Block1984	Chr.1	9998613	10007855	b	h	h	a	a	a	a	b	a	b	h	h	b	h	h	b	h	h	b	a	a	b	a	h	a	a	a	b	a	h	a	h	h	b	a	a	h	a	b	b	a	b	b	h	a	b
Block1987	Chr.1	10008906	10016286	b	h	h	a	a	a	a	b	a	b	h	h	b	h	h	b	b	h	b	a	a	b	a	h	a	a	a	b	a	b	a	h	h	b	a	a	h	a	h	b	a	b	h	h	a	h
Block1994	Chr.1	10027414	10037196	b	h	h	a	a	a	a	b	a	b	h	h	b	h	h	b	b	h	b	a	a	b	a	h	a	a	a	b	a	b	a	h	h	b	a	a	h	a	h	b	a	b	h	h	a	h
Block1995	Chr.1	10037210	10045388	b	h	h	a	a	a	a	b	a	b	h	h	b	h	h	b	h	h	b	a	a	b	a	h	a	a	a	b	a	h	a	h	h	b	a	a	h	a	h	b	a	b	h	h	a	h
Block2021	Chr.1	10083781	10089664	b	h	h	a	a	a	a	b	a	b	h	h	b	h	h	b	h	h	b	a	a	b	a	h	a	a	a	b	a	h	a	h	h	b	a	a	h	a	h	b	a	b	h	h	a	h
Block2031	Chr.1	10103790	10111791	b	h	h	a	a	a	a	b	a	b	h	h	b	h	h	b	h	h	b	a	a	b	a	h	a	a	a	b	a	h	a	h	h	b	a	a	h	a	h	b	a	b	h	h	a	h
Block2061	Chr.1	10148650	10156080	b	h	h	a	a	a	a	b	a	b	h	h	b	h	h	b	h	h	b	a	a	b	a	h	a	a	a	b	a	h	a	h	h	b	a	a	h	a	h	b	a	b	h	h	a	h
Block2062	Chr.1	10156109	10164826	b	h	h	a	a	a	a	b	a	b	h	h	b	h	h	b	h	h	b	a	a	b	a	h	a	a	a	b	a	h	a	h	h	b	a	a	h	a	h	b	a	b	h	h	a	a
Block2084	Chr.1	10183195	10197169	b	h	h	a	a	a	a	b	a	b	h	h	b	h	h	b	h	h	b	a	a	b	a	h	a	a	a	b	a	h	a	h	h	b	a	a	h	a	a	b	a	b	h	h	a	h
Block2092	Chr.1	10204340	10210407	b	h	h	a	a	a	a	b	a	b	h	h	b	h	h	b	h	h	b	a	a	b	a	h	a	a	a	b	a	h	a	h	h	b	a	a	h	a	h	b	a	b	h	h	a	h
Block2095	Chr.1	10214049	10220847	b	h	h	a	a	a	a	b	a	b	h	h	b	h	h	b	h	h	b	a	a	b	a	b	a	a	a	b	a	h	a	h	h	b	a	a	h	a	h	b	a	b	h	h	a	h
Block2448	Chr.1	10535340	10546126	b	h	h	a	a	a	a	b	a	b	h	h	b	h	h	b	h	h	b	a	a	b	a	b	a	a	a	b	a	h	a	h	a	b	a	a	h	a	h	b	a	b	h	h	a	h
Block2454	Chr.1	10554679	10562874	b	h	h	a	a	a	a	b	a	b	h	h	b	h	h	b	h	h	b	a	a	b	a	b	a	a	a	b	a	h	a	h	h	b	a	a	h	a	h	b	a	b	h	h	a	h
Block2457	Chr.1	10566946	10580960	b	h	h	a	a	a	a	b	a	b	h	h	b	h	h	b	h	h	b	a	a	b	a	b	a	a	a	b	a	h	a	h	h	b	a	a	h	a	h	b	a	b	h	h	a	h
Block2459	Chr.1	10585933	10595175	b	h	h	a	a	a	a	b	a	b	h	h	b	h	h	b	h	h	b	a	a	b	a	b	a	a	a	b	a	h	a	h	h	b	a	a	a	a	h	b	a	b	h	h	a	h
Block2461	Chr.1	10599515	10607167	b	h	h	a	a	a	a	b	a	b	h	h	b	h	h	b	h	h	b	a	a	b	a	b	a	a	a	b	a	a	a	h	h	b	a	a	h	a	h	b	a	b	a	h	a	h
Block2552	Chr.1	10669072	10683744	b	h	h	a	a	a	a	b	h	b	a	a	b	h	h	b	h	h	h	a	a	b	a	b	a	a	a	b	a	h	a	h	h	b	a	a	h	a	a	b	a	b	h	h	a	h
Block2911	Chr.1	24004744	24037339	b	h	h	a	a	a	a	b	h	b	a	a	b	h	h	b	h	h	h	a	a	b	a	b	a	a	a	b	a	h	a	h	h	b	a	a	h	a	a	b	a	b	h	h	a	h
Block2912	Chr.1	24048679	24064131	b	h	h	a	a	a	a	b	h	b	a	a	b	h	h	b	h	h	h	a	a	b	a	b	a	a	a	b	a	h	h	h	h	b	a	a	h	a	a	b	a	b	h	h	a	a
Block3029	Chr.1	24259266	24271170	b	h	h	a	a	a	a	b	h	b	a	a	b	h	h	b	h	h	h	a	a	b	a	b	a	a	a	b	a	a	h	h	h	b	a	a	h	a	a	b	a	b	a	h	a	h
Block3047	Chr.1	24285261	24291094	b	h	h	a	a	a	a	b	h	b	a	a	b	a	h	b	h	h	h	a	a	b	a	b	a	a	a	b	a	h	h	h	a	b	a	a	h	a	a	b	a	b	h	h	a	h
Block3078	Chr.1	24308566	24315538	b	h	h	a	a	a	a	b	h	b	a	a	b	h	h	b	h	h	h	a	a	b	a	b	a	a	a	b	a	h	h	h	h	b	a	a	h	a	a	b	a	b	h	h	a	h
Block3102	Chr.1	24353618	24362505	b	h	h	a	a	a	a	b	h	b	a	a	b	h	h	b	h	h	h	a	a	b	a	b	a	a	a	b	a	h	h	h	h	b	a	a	h	a	a	b	a	b	h	h	a	h
Block3104	Chr.1	24365039	24375576	b	h	h	a	a	a	a	b	h	b	a	a	b	h	h	b	h	h	h	a	a	b	a	b	a	a	a	b	a	a	h	h	h	b	a	a	h	a	a	b	a	b	h	h	a	h
Block3108	Chr.1	24379790	24385798	b	h	h	a	a	a	a	b	h	b	a	a	b	h	h	b	h	h	h	a	a	b	a	b	a	a	a	b	a	h	h	h	h	b	a	a	h	a	a	b	a	b	h	h	a	a
Block3234	Chr.1	24475680	24485495	b	h	h	a	a	a	a	b	h	b	a	a	b	h	h	b	h	h	h	a	a	b	a	b	a	a	a	b	a	h	h	a	h	b	a	a	a	a	a	b	a	b	h	h	a	h
Block3257	Chr.1	24503979	24512876	b	h	h	a	a	a	a	b	h	b	a	a	b	h	h	b	h	h	h	a	a	b	a	b	a	a	a	b	a	h	a	h	h	b	a	a	h	a	a	b	a	b	h	a	a	h
Block3298	Chr.1	24535668	24543823	b	h	h	a	a	a	a	b	h	b	a	a	b	h	h	b	h	h	h	a	a	b	a	b	a	a	a	b	a	h	h	h	h	b	a	a	a	a	a	b	a	b	h	h	a	h
Block3346	Chr.1	24618215	24626428	b	h	h	a	a	a	a	h	a	b	a	a	h	h	h	a	h	b	a	a	a	b	a	b	a	a	a	b	a	a	h	b	a	h	h	a	h	h	a	b	a	b	b	b	a	a
Block3876	Chr.1	29652594	29661930	h	a	h	a	h	a	a	a	h	b	a	a	a	h	b	a	b	a	a	b	h	a	h	a	h	h	h	a	b	a	h	h	a	a	h	a	a	a	h	a	h	h	a	h	a	h
Block4774	Chr.1	39990495	40048297	b	h	h	a	b	b	h	h	h	b	a	a	h	h	b	h	b	a	a	b	h	h	a	a	h	h	h	a	b	a	b	b	a	a	h	h	h	h	b	a	h	h	a	h	a	h
Block4793	Chr.1	40141920	40148174	b	h	h	a	b	b	h	h	h	h	a	a	h	h	b	h	h	h	h	h	h	h	a	h	h	h	h	a	b	a	b	h	a	h	h	h	h	h	b	a	h	h	a	h	h	h
Block5186	Chr.1	40551784	40565072	h	h	h	a	b	b	h	h	h	h	a	a	h	h	h	h	h	h	h	h	h	h	a	a	h	h	h	a	h	a	h	h	a	h	h	h	a	a	h	a	h	h	a	h	h	h
Block5487	Chr.1	41143503	41184275	h	h	h	a	h	h	h	h	b	b	b	b	h	b	b	a	b	a	a	h	h	b	h	a	a	h	h	h	h	h	a	h	h	a	h	h	h	h	a	h	h	h	a	b	h	a
Block5559	Chr.2	35304	40746	b	h	b	a	b	h	a	h	b	b	b	b	h	b	b	a	b	a	a	h	h	b	h	a	a	h	h	h	h	h	a	h	h	a	h	h	h	h	a	h	h	h	a	b	h	a
Block5563	Chr.2	51471	66437	b	h	b	a	b	h	a	h	b	b	b	b	h	b	b	a	b	a	h	h	h	b	h	a	a	h	h	h	h	h	a	h	h	a	h	h	h	h	a	h	h	h	a	b	h	a
Block5567	Chr.2	75570	89134	b	h	b	a	b	h	a	h	b	b	b	b	h	b	b	a	b	a	h	h	h	b	h	a	a	h	h	h	h	h	a	h	h	a	h	h	h	h	a	h	h	h	a	b	a	a
Block5569	Chr.2	91921	102683	b	h	b	a	b	h	a	h	b	b	b	b	h	b	b	a	b	a	h	a	h	b	h	a	a	h	h	h	h	h	a	h	h	a	h	a	h	h	a	h	h	h	a	b	h	a
Block5583	Chr.2	115137	155208	b	a	b	a	b	h	a	h	b	b	b	b	h	b	b	a	b	a	h	a	h	b	h	a	a	h	h	h	h	h	a	h	h	a	h	a	h	h	a	h	h	h	a	b	h	a
Block5584	Chr.2	157393	195795	b	a	b	a	b	h	a	h	b	b	b	b	h	h	b	a	b	a	h	h	b	b	h	a	a	b	h	h	h	h	a	h	h	a	h	a	h	h	a	b	h	h	a	b	b	a
Block5611	Chr.2	258549	264052	h	h	b	a	b	h	a	h	b	b	b	b	h	h	b	a	b	a	h	h	h	b	h	a	a	h	h	h	h	h	a	h	h	a	h	a	h	h	a	h	h	h	a	b	h	a
Block5640	Chr.2	296391	304228	h	h	b	a	b	h	a	h	b	b	b	b	h	h	b	a	b	a	h	h	h	b	h	a	a	h	h	h	h	h	a	h	h	a	h	a	h	h	a	h	h	h	a	b	h	a
Block5642	Chr.2	306267	350951	h	h	b	a	b	h	a	h	b	b	b	b	h	h	b	a	b	a	h	h	h	b	h	a	a	h	h	h	h	h	a	h	h	a	h	a	h	h	a	h	h	h	a	b	h	a
Block5643	Chr.2	352382	359253	h	h	b	a	b	h	a	h	b	b	b	b	h	h	b	a	b	a	h	h	h	b	h	a	a	h	h	h	h	h	a	h	h	a	h	a	h	h	a	h	h	h	a	b	h	a
Block5644	Chr.2	359306	370489	h	h	b	a	b	h	a	h	b	b	b	b	h	h	b	a	b	a	h	h	h	b	h	a	a	h	h	h	h	h	a	h	h	a	h	a	h	h	a	h	h	h	a	b	h	a
Block5645	Chr.2	370695	387268	b	h	b	a	b	h	a	h	b	b	b	b	h	h	b	a	b	a	h	h	h	b	h	a	a	h	h	h	h	h	a	h	h	a	h	a	h	h	a	h	h	h	a	b	h	a
Block5646	Chr.2	387312	471053	h	h	b	a	b	h	a	h	b	b	b	b	h	h	b	a	b	a	h	h	h	b	h	a	a	h	h	h	h	h	a	h	h	a	h	a	h	h	a	h	h	h	a	b	h	a
Block5647	Chr.2	471726	530525	h	h	b	a	b	h	a	h	b	b	b	b	h	h	b	a	b	a	h	h	h	b	h	a	a	h	h	h	h	h	a	h	h	a	h	a	h	h	a	h	h	h	a	b	h	a
Block5649	Chr.2	533330	552356	h	h	b	a	b	h	a	h	b	b	b	b	h	h	b	a	b	a	h	h	h	b	h	a	a	h	h	h	h	h	a	h	h	a	h	a	h	h	a	h	h	h	a	b	h	a
Block5650	Chr.2	552592	570868	h	h	b	a	b	h	a	h	b	b	b	b	h	h	b	a	b	a	h	h	h	b	h	a	a	h	h	h	h	h	a	h	h	a	h	a	h	h	a	h	h	h	a	b	h	a
Block5651	Chr.2	572183	580436	h	h	b	a	b	h	a	h	b	b	b	b	h	b	b	a	b	a	h	h	h	b	h	a	a	h	h	h	h	h	a	h	h	a	h	a	h	h	a	h	h	h	a	b	b	a
Block5669	Chr.2	605276	618073	b	h	b	a	b	b	a	h	b	b	b	b	h	b	b	a	b	a	b	h	h	b	h	a	a	h	h	h	h	h	a	h	h	a	h	a	h	h	a	h	h	h	a	b	b	a
Block5674	Chr.2	628519	633851	h	h	b	a	b	b	a	h	b	b	b	b	h	b	b	a	b	a	b	h	h	b	h	a	a	h	h	h	h	h	a	h	h	a	h	a	h	h	a	h	h	h	a	b	b	a
Block5677	Chr.2	634651	646512	h	h	b	a	b	h	a	h	b	b	b	b	h	h	b	a	b	a	b	h	b	b	h	a	a	h	h	h	h	h	a	h	h	a	h	a	h	h	a	h	h	h	a	b	h	a
Block5680	Chr.2	651154	659415	h	h	b	a	b	h	a	h	b	b	b	b	h	h	b	a	b	a	h	h	h	b	h	a	a	h	h	h	h	h	a	h	h	a	h	a	h	h	a	h	h	h	a	b	h	a
Block5763	Chr.2	718635	735694	h	h	b	a	b	h	a	h	b	b	b	b	h	h	b	a	b	a	h	h	h	b	h	a	a	h	h	h	h	h	a	h	h	a	h	a	h	h	a	h	h	h	a	b	h	a
Block5766	Chr.2	740426	775655	h	h	b	a	b	h	a	h	b	b	b	b	h	h	b	a	b	a	h	h	h	b	h	a	a	h	h	h	h	h	a	h	h	a	h	a	h	h	a	h	h	h	a	b	h	a
Block5767	Chr.2	775772	817352	h	h	b	a	b	h	a	h	b	b	b	b	h	h	b	a	b	a	h	h	h	b	h	a	a	h	h	h	h	h	a	h	h	a	h	a	h	h	a	h	h	h	a	b	h	a
Block5768	Chr.2	817365	858801	h	h	b	a	b	h	a	h	b	b	b	b	h	h	b	a	b	a	h	h	h	b	h	a	a	h	h	h	h	h	a	h	h	a	h	a	h	h	a	h	h	h	a	b	h	a
Block5772	Chr.2	865074	893671	h	h	b	a	b	h	a	h	b	b	b	b	h	h	b	a	b	a	h	h	h	b	h	a	a	h	h	h	h	h	a	h	h	a	h	a	h	h	a	h	h	h	a	b	h	a
Block5773	Chr.2	893790	902391	h	h	b	a	b	h	a	h	b	b	b	b	h	h	b	a	b	a	h	h	h	b	h	a	a	h	h	h	h	h	a	h	h	a	h	a	h	h	a	h	h	h	a	b	h	a
Block5774	Chr.2	904641	911340	h	h	b	a	b	h	a	h	b	b	b	b	h	h	b	a	b	a	h	h	h	b	h	a	a	h	h	h	h	h	a	h	h	a	h	a	h	h	a	h	h	h	a	b	h	a
Block5777	Chr.2	920211	935273	h	h	b	a	b	h	a	h	b	b	b	b	h	h	b	a	b	a	h	h	h	b	h	a	a	h	h	h	h	h	a	h	h	a	h	a	h	h	a	h	h	h	a	b	h	a
Block5779	Chr.2	937510	958383	h	h	b	a	b	h	a	h	b	b	b	b	h	h	b	a	b	a	h	h	h	b	h	a	a	h	h	h	h	h	a	h	h	a	h	a	h	h	a	h	h	h	a	b	h	a
Block5780	Chr.2	958997	993234	h	h	b	a	b	h	a	h	b	b	b	b	h	h	b	a	b	a	h	h	h	b	h	a	a	h	h	h	h	h	a	h	h	a	h	a	h	h	a	h	h	h	a	b	h	a
Block5781	Chr.2	993252	1013956	h	h	b	a	b	h	a	h	b	b	b	b	h	h	b	a	b	a	h	h	h	b	h	a	a	h	h	h	h	h	a	h	h	a	h	a	h	h	a	h	h	h	a	b	h	a
Block5782	Chr.2	1016368	1023798	h	h	b	a	b	h	a	h	b	b	b	b	h	h	b	a	b	a	h	h	h	b	h	a	a	h	h	h	h	h	a	h	h	a	h	a	h	h	a	h	h	h	a	b	h	a
Block5783	Chr.2	1023825	1033748	h	h	b	a	b	h	a	h	b	b	b	b	h	h	b	a	b	a	h	h	h	b	h	a	a	h	h	h	h	h	a	h	h	a	h	a	h	h	a	h	h	h	a	b	h	a
Block5784	Chr.2	1033904	1045661	h	h	b	a	b	h	a	h	b	b	b	b	h	h	b	a	b	a	h	h	h	b	h	a	a	h	h	h	h	h	a	h	h	a	h	a	h	h	a	h	h	h	a	b	h	a
Block5787	Chr.2	1047428	1071303	h	h	b	a	b	h	a	h	b	b	b	b	h	h	b	a	b	a	h	h	h	b	h	a	a	h	h	h	h	h	a	h	h	a	h	a	h	h	a	h	h	h	a	b	h	a
Block5789	Chr.2	1072055	1080699	h	h	b	a	b	h	a	h	b	b	b	b	h	h	b	a	b	a	h	h	h	b	h	a	a	h	h	h	h	h	a	h	h	a	h	a	h	h	a	h	h	h	a	b	h	a
Block5792	Chr.2	1083945	1096163	h	h	b	a	b	h	a	h	b	b	b	b	h	h	b	a	b	a	h	h	h	b	h	a	a	h	h	h	h	h	a	h	h	a	h	a	h	h	a	h	h	h	a	b	h	a
Block5794	Chr.2	1098947	1107535	h	h	b	a	b	h	a	h	b	b	b	b	h	h	b	a	b	a	h	h	h	b	h	a	a	h	h	h	h	h	a	h	h	a	h	a	h	h	a	h	h	h	a	b	h	a
Block5796	Chr.2	1107875	1135167	h	h	b	a	b	h	a	h	b	b	b	b	h	h	b	a	b	a	h	h	h	b	h	a	a	h	h	h	h	h	a	h	h	a	h	a	h	h	a	h	h	h	a	b	h	a
Block5798	Chr.2	1136908	1144152	h	h	b	a	b	h	a	h	b	b	b	b	h	h	b	a	b	a	h	h	h	b	h	a	a	h	h	h	h	h	a	h	h	a	h	a	h	h	a	h	h	h	a	b	h	a
Block5799	Chr.2	1144161	1149879	h	h	b	a	b	h	a	h	b	b	b	b	h	h	b	a	b	a	h	h	h	b	h	a	a	h	h	h	h	h	a	h	h	a	h	a	h	h	a	h	h	h	a	b	h	a
Block5800	Chr.2	1150036	1165960	h	h	b	a	b	h	a	h	b	b	b	b	h	h	b	a	b	a	h	h	h	b	h	a	a	h	h	h	h	h	a	h	h	a	h	a	h	h	a	h	h	h	a	b	h	a
Block5803	Chr.2	1176167	1186713	h	h	b	a	b	h	a	h	b	b	b	b	h	h	b	a	b	a	h	h	h	b	h	a	a	h	h	h	h	h	a	h	h	a	h	a	h	h	a	h	h	h	a	b	h	a
Block5817	Chr.2	1200133	1216031	h	h	b	a	b	h	a	h	b	b	b	b	h	h	b	a	b	a	h	h	h	b	h	a	a	h	h	h	h	h	a	h	h	a	h	a	h	h	a	h	h	h	a	b	h	a
Block5818	Chr.2	1216364	1222627	h	h	b	a	b	h	a	h	b	b	b	b	h	h	b	a	b	a	h	h	h	b	h	a	a	b	h	h	h	h	a	h	h	a	h	a	h	h	a	h	h	h	a	b	h	a
Block5836	Chr.2	1249015	1258963	h	h	b	a	b	h	a	h	b	b	b	b	h	h	b	a	b	a	h	h	h	b	h	a	a	h	h	h	h	h	a	h	h	a	h	a	h	h	a	h	h	h	a	b	h	a
Block5838	Chr.2	1259357	1335593	h	h	b	a	b	h	a	h	b	b	b	b	h	h	b	a	b	a	h	h	h	b	h	a	a	h	h	h	h	h	a	h	h	a	h	a	h	h	a	h	h	b	a	b	h	a
Block5846	Chr.2	1342906	1348347	h	h	b	a	b	h	a	h	b	b	b	b	h	h	b	a	b	a	h	h	h	b	h	a	a	h	h	h	h	h	a	h	h	a	h	a	h	h	a	h	h	h	a	b	h	a
Block5859	Chr.2	1361943	1371044	h	h	b	a	b	h	a	h	b	b	b	b	h	h	b	a	b	a	h	h	h	b	h	a	a	h	h	h	h	h	a	h	h	a	h	a	h	h	a	h	h	h	a	b	h	a
Block5861	Chr.2	1373522	1381277	h	h	b	a	b	a	a	h	b	b	b	b	a	h	b	a	b	a	h	a	h	b	h	a	a	h	h	h	h	h	a	h	h	a	h	a	h	h	a	h	h	h	a	b	a	a
Block5936	Chr.2	1498589	1514942	h	a	b	a	b	h	a	h	b	b	b	b	h	a	b	a	b	a	h	h	h	b	h	a	a	a	h	h	h	h	a	a	h	a	a	a	h	h	a	h	h	h	a	b	h	a
Block5979	Chr.2	1553574	1560752	h	h	b	a	b	a	a	h	b	b	b	b	h	a	b	a	b	a	h	a	h	b	h	a	a	a	h	h	h	h	a	a	h	a	a	a	h	h	a	h	h	h	a	b	h	a
Block5980	Chr.2	1560828	1569423	h	h	b	a	b	a	a	h	b	b	b	b	h	h	b	a	b	a	h	a	h	b	h	a	a	h	h	h	h	a	a	h	h	a	h	a	h	h	a	h	h	h	a	b	h	a
Block5995	Chr.2	1582319	1587328	h	h	b	a	b	h	a	h	b	b	b	b	h	h	b	a	b	a	h	a	h	b	h	a	a	h	a	a	h	h	a	a	h	a	h	a	h	h	a	h	h	h	a	b	h	a
Block6054	Chr.2	1618121	1641204	h	h	b	a	b	h	a	h	b	b	b	b	h	a	b	a	b	a	h	a	h	b	h	a	a	a	h	h	a	h	a	h	h	a	h	a	h	h	a	h	h	h	a	b	h	a
Block6114	Chr.2	1697647	1705370	a	h	b	a	b	h	a	h	b	b	b	b	a	h	b	a	b	a	a	h	h	b	h	a	a	h	a	h	h	h	a	h	h	a	a	a	a	h	a	h	h	h	a	b	a	a
Block6168	Chr.2	1749318	1783921	h	h	b	a	b	h	a	h	b	b	b	b	a	h	b	a	b	a	a	h	h	b	h	a	a	h	a	h	h	h	a	h	h	a	a	a	a	h	a	h	h	h	a	b	a	a
Block6171	Chr.2	1846042	1929200	h	h	b	a	b	h	a	h	b	b	b	b	a	h	b	a	b	a	a	h	h	b	h	a	a	h	a	h	h	h	a	h	h	a	a	a	h	h	a	h	h	h	a	b	a	a
Block6172	Chr.2	1956274	1974128	h	h	b	a	b	h	a	h	b	b	b	b	h	h	b	a	b	a	h	h	h	b	h	a	a	h	h	h	h	h	a	h	h	a	a	a	h	h	h	h	h	h	a	b	h	a
Block6238	Chr.2	2022348	2040736	h	h	b	a	b	h	a	h	b	b	b	b	h	h	b	a	b	a	h	h	h	b	h	a	a	h	h	h	h	h	a	h	h	a	a	a	h	h	h	h	h	h	a	b	h	a
Block6239	Chr.2	2040795	2046129	h	h	b	a	b	h	a	h	b	b	b	b	h	h	b	a	b	a	h	h	h	b	h	a	a	h	h	h	h	h	a	a	h	a	a	a	h	h	h	h	h	h	a	b	h	a
Block6243	Chr.2	2049534	2067375	h	h	b	a	b	h	a	h	b	b	b	b	h	h	b	a	b	a	h	h	h	b	h	a	a	h	h	h	h	h	a	a	h	a	h	a	h	h	h	h	h	h	a	b	h	a
Block6246	Chr.2	2076708	2136987	h	h	b	a	b	h	a	h	b	b	b	b	h	h	b	a	b	a	h	h	h	b	h	a	a	h	b	h	b	h	a	h	h	a	h	a	h	h	h	h	h	h	a	b	h	a
Block6254	Chr.2	2170020	2180309	h	h	b	a	b	h	a	h	b	b	b	b	h	h	b	a	b	a	h	h	h	b	h	a	a	h	b	h	b	h	a	h	h	a	b	a	h	h	h	h	h	h	a	b	h	a
Block6255	Chr.2	2180682	2190256	h	h	b	a	b	h	a	h	b	b	b	b	h	b	b	a	b	a	h	h	h	b	b	a	a	h	b	h	b	h	a	h	h	a	h	a	h	h	b	h	h	h	a	b	h	a
Block6297	Chr.2	2259431	2270557	h	h	b	a	b	h	a	h	b	b	b	b	h	b	b	a	b	a	h	h	h	b	b	a	a	h	b	h	b	h	a	h	h	a	h	a	h	h	b	h	h	h	a	b	h	a
Block6299	Chr.2	2270706	2279260	h	h	b	a	b	h	a	h	b	b	b	b	h	h	b	a	h	a	h	h	h	b	h	a	a	h	b	b	b	h	a	h	h	a	h	a	h	h	h	h	h	h	a	b	h	a
Block6344	Chr.2	2316677	2335507	h	h	b	a	b	h	a	h	b	b	b	b	h	h	b	a	h	a	h	h	h	b	h	a	a	h	b	b	b	h	a	h	h	a	h	a	h	h	h	h	h	h	a	b	h	a
Block6345	Chr.2	2335628	2385815	h	h	b	a	b	h	a	h	b	b	b	b	h	h	b	a	b	a	h	h	h	b	h	a	a	h	b	h	b	h	a	h	h	a	h	a	h	h	h	h	h	h	a	b	h	a
Block6352	Chr.2	2412828	2418221	h	h	b	a	b	h	a	a	h	h	b	b	b	a	b	a	h	a	h	b	h	h	h	h	h	a	h	h	h	h	a	h	h	a	a	a	a	b	b	b	h	b	b	b	b	a
Block7713	Chr.2	5781174	5830572	h	h	h	h	a	b	h	a	h	h	b	b	b	a	b	a	h	a	h	b	h	h	h	h	h	a	h	h	h	h	a	h	h	a	a	a	a	b	b	b	h	b	b	b	b	a
Block7715	Chr.2	5840892	5918232	h	h	h	h	a	b	h	a	h	h	b	b	b	a	b	a	h	a	h	b	a	h	h	h	h	a	h	h	h	h	a	h	h	a	a	a	a	b	b	b	h	b	b	b	b	a
Block7718	Chr.2	6049093	6117025	h	h	h	h	a	b	h	a	h	h	b	b	b	a	b	a	h	a	h	b	a	h	h	h	h	a	h	h	h	h	a	h	h	a	a	a	a	b	b	b	h	b	b	b	b	a
Block7719	Chr.2	6119457	6137810	h	h	h	h	a	b	h	a	h	h	b	b	b	a	b	a	h	a	h	b	a	h	h	h	h	a	h	h	h	h	a	h	h	a	a	a	a	b	b	b	h	b	b	b	b	a
Block7720	Chr.2	6166847	6232266	h	h	h	h	a	b	h	a	h	h	b	b	b	a	b	a	h	a	h	b	a	h	h	h	h	a	h	h	h	h	a	h	h	h	a	a	a	b	b	b	h	b	b	b	b	a
Block7721	Chr.2	6252283	6257789	h	h	h	h	a	b	h	a	h	h	b	b	b	a	b	a	h	a	h	b	a	h	h	h	h	a	h	h	h	h	a	h	h	h	a	a	a	b	b	b	h	b	b	b	b	a
Block7722	Chr.2	6263324	6333122	h	h	h	h	a	b	h	a	h	h	b	b	b	a	b	a	h	a	h	b	a	h	h	h	h	a	h	h	h	h	a	h	h	h	a	a	a	b	b	b	h	b	b	b	b	a
Block7726	Chr.2	6357930	6440797	h	h	h	h	a	b	h	a	h	h	b	b	b	a	b	a	h	a	h	b	a	h	h	h	h	a	h	h	h	h	a	h	h	h	a	a	a	b	b	b	h	b	b	b	b	a
Block7727	Chr.2	6445527	6702319	h	h	h	h	a	h	h	a	h	h	b	b	b	a	b	a	h	a	h	b	a	h	h	h	h	a	h	h	h	h	a	h	h	h	a	a	a	b	b	b	h	b	b	b	b	a
Block7728	Chr.2	6712862	6733820	h	h	h	h	a	h	h	a	h	h	b	b	b	a	b	a	h	a	h	b	a	h	h	h	h	a	h	h	h	h	a	h	h	h	a	a	a	b	b	b	h	b	b	b	b	a
Block7729	Chr.2	6744412	6804521	h	h	h	h	a	h	h	a	h	h	b	b	b	a	b	a	h	a	h	b	a	h	h	h	h	a	h	h	h	h	a	h	h	h	a	a	a	b	b	b	h	b	b	b	b	a
Block7730	Chr.2	6809115	6864390	h	h	h	h	a	h	h	a	h	h	b	b	b	a	b	a	h	a	h	b	a	h	h	h	h	a	h	h	h	h	a	h	h	h	a	a	a	b	b	b	h	b	b	b	b	a
Block7731	Chr.2	6878538	6898155	h	h	h	h	a	h	h	b	a	b	b	b	h	h	b	h	h	b	h	h	a	b	h	a	b	h	b	h	b	h	h	a	b	a	a	a	h	a	h	h	h	a	h	a	h	h
Block9485	Chr.2	22670543	22682696	h	h	b	a	a	h	h	b	a	b	b	b	h	h	b	h	h	b	h	h	a	b	h	a	b	h	b	a	b	h	h	a	b	a	a	a	h	a	h	h	h	a	h	a	h	h
Block9494	Chr.2	22690139	22697782	h	h	b	h	a	h	h	h	a	h	a	h	h	b	a	a	h	h	h	h	h	h	h	a	b	h	h	h	h	h	b	h	b	b	h	a	a	b	b	h	h	h	b	h	b	a
Block10006	Chr.2	25712414	25735834	h	b	a	a	b	a	a	h	a	h	h	h	h	b	h	a	h	h	h	h	h	h	h	a	b	h	h	h	h	h	b	h	b	b	h	h	a	b	b	h	h	h	b	h	b	a
Block10083	Chr.2	25801181	25807009	h	b	a	a	b	h	a	h	a	a	h	h	h	b	h	a	h	h	h	h	h	h	h	a	b	h	h	h	h	h	b	h	b	b	h	h	a	b	b	h	h	h	b	h	b	a
Block10088	Chr.2	25815593	25821077	h	b	a	a	b	h	h	h	a	h	h	h	h	b	h	a	h	h	h	h	h	h	a	a	b	h	h	h	h	a	b	h	b	b	h	h	a	b	b	h	h	h	b	h	b	a
Block10096	Chr.2	25830526	25835644	h	b	a	a	b	h	h	h	a	h	h	h	h	b	h	a	h	h	h	h	h	h	h	a	b	h	h	h	a	h	b	h	b	b	h	a	a	b	b	h	h	h	b	h	b	a
Block10225	Chr.2	25916083	25939496	h	b	a	a	b	h	h	h	a	h	h	h	h	b	h	a	h	h	h	h	h	h	h	a	b	h	h	h	h	h	b	h	b	b	h	h	a	b	b	h	h	h	b	h	b	a
Block10237	Chr.2	25951067	25956161	h	b	a	a	b	h	h	h	a	h	h	h	h	b	h	a	h	h	h	h	h	h	h	a	b	h	h	h	h	h	b	h	b	b	h	h	a	b	b	h	h	h	b	h	b	a
Block10255	Chr.2	25968080	26000570	h	b	a	a	b	h	h	h	a	a	h	h	a	b	h	a	h	h	h	h	h	h	h	a	b	h	h	h	h	h	b	h	b	b	a	a	a	b	b	h	h	h	b	a	b	a
Block10296	Chr.2	26043678	26065192	h	b	a	a	b	h	h	h	a	h	h	h	h	b	h	a	h	h	a	h	h	h	h	a	b	h	h	a	h	h	b	a	b	b	h	h	a	b	b	a	h	h	b	h	b	a
Block10330	Chr.2	26075367	26140699	h	b	a	a	b	h	h	h	a	h	h	a	a	b	h	a	h	h	a	h	a	h	h	a	b	h	h	a	a	h	b	h	b	b	h	h	a	b	b	a	h	h	b	a	b	a
Block10345	Chr.2	26141865	26146932	h	b	a	a	b	h	h	h	a	h	h	h	a	b	h	a	h	h	h	h	h	h	h	a	b	h	a	h	a	a	b	h	b	b	h	a	a	b	b	a	h	h	b	h	b	a
Block10398	Chr.2	26154025	26166337	h	b	a	a	b	h	h	h	a	h	h	h	h	b	h	a	h	h	h	h	h	h	a	a	b	h	h	h	h	h	b	a	b	b	h	h	a	b	b	h	h	h	b	h	b	a
Block10506	Chr.2	26227076	26233284	h	b	a	a	b	h	h	h	a	h	h	h	h	b	h	a	h	h	h	h	h	h	h	a	b	h	h	h	h	h	b	h	b	b	h	h	a	b	b	h	h	h	b	h	b	a
Block10518	Chr.2	26242573	26247876	h	b	a	a	b	h	h	h	a	h	h	h	h	b	h	a	h	h	h	h	h	h	h	a	b	h	h	h	h	h	b	h	b	b	h	h	a	b	b	h	h	h	b	h	b	a
Block11424	Chr.2	26638404	26643415	h	b	a	a	b	h	h	h	a	h	h	h	h	b	h	a	h	h	h	h	h	h	h	a	b	h	h	h	h	h	b	h	b	b	h	h	a	b	b	h	h	h	b	h	b	a
Block11428	Chr.2	26644111	26652617	h	b	a	a	b	h	h	h	a	h	h	h	h	b	h	a	h	h	h	h	h	h	h	a	b	h	h	h	h	h	b	h	b	b	h	a	a	b	b	h	h	h	b	h	b	a
Block11485	Chr.2	26666433	26678972	h	b	a	a	b	h	h	h	a	h	h	h	h	b	h	a	h	h	h	a	h	h	h	a	b	h	a	h	h	h	b	h	b	b	h	h	a	b	b	h	h	h	b	h	b	a
Block11786	Chr.2	26833505	26842103	h	b	a	a	b	h	h	h	a	h	h	h	a	b	a	a	h	h	a	h	h	a	h	a	b	h	h	h	h	h	b	h	b	b	h	h	a	b	b	h	h	h	b	a	b	a
Block11826	Chr.2	26858926	26883071	a	b	a	a	b	h	h	h	a	h	h	h	a	b	a	a	h	h	a	h	h	a	h	a	b	h	h	h	h	h	b	h	b	b	h	h	a	b	b	h	h	h	b	a	b	a
Block11827	Chr.2	26883137	26913920	a	b	a	a	b	h	h	h	a	h	h	h	h	b	h	a	h	h	a	h	h	h	h	a	b	h	h	h	h	a	b	h	b	b	a	a	a	b	b	h	h	h	b	h	b	a
Block11844	Chr.2	26920188	26934582	a	b	a	a	b	h	h	h	a	h	h	h	h	b	h	a	h	h	a	h	a	h	h	a	b	h	h	h	h	a	b	h	b	b	a	a	a	b	b	h	h	h	b	h	b	a
Block11851	Chr.2	26943336	26957653	h	b	a	a	b	h	h	h	a	a	h	h	h	b	h	a	a	h	h	h	a	h	h	a	b	h	h	h	h	h	b	a	b	b	h	h	a	b	b	h	h	h	b	a	b	a
Block11918	Chr.2	27025057	27086310	a	b	a	a	b	h	h	h	a	a	h	h	h	b	h	a	a	h	h	h	a	h	h	a	b	h	h	h	h	h	b	a	b	b	h	h	a	b	b	h	h	h	b	a	b	a
Block11919	Chr.2	27086332	27125626	a	b	a	a	b	h	h	h	a	a	h	h	h	b	h	a	h	h	h	h	a	h	h	a	b	h	h	a	h	h	b	h	b	b	h	h	a	b	b	h	h	h	b	h	b	a
Block12088	Chr.2	27206296	27212374	h	b	a	a	b	h	h	h	a	h	h	h	h	b	h	h	a	h	b	h	h	h	h	a	b	h	h	h	h	a	b	h	b	b	h	h	a	h	b	h	h	h	b	h	h	b
Block12296	Chr.2	33216250	33225200	b	b	a	a	h	h	h	h	a	h	h	h	h	b	h	h	a	h	b	h	h	h	h	a	b	h	h	h	h	a	b	h	b	b	h	h	a	b	b	h	h	h	b	h	h	b
Block12298	Chr.2	33235575	33243408	b	b	a	a	h	h	h	h	a	h	h	h	h	b	h	h	a	h	b	h	h	h	h	a	b	h	h	h	h	a	b	h	b	b	h	h	a	b	b	h	h	h	b	h	h	b
Block12299	Chr.2	33246101	33272017	b	b	a	a	h	h	h	h	a	h	h	h	h	b	h	h	a	h	b	h	h	h	h	a	b	h	h	h	h	a	b	h	b	b	h	h	a	b	b	h	h	h	b	h	h	b
Block12301	Chr.2	33298496	33376667	b	b	a	a	h	h	h	h	a	h	h	h	h	b	h	h	a	h	b	h	h	h	h	a	b	h	h	h	h	a	b	h	b	b	h	h	a	b	b	h	h	h	b	h	h	b
Block12302	Chr.2	33378588	33405148	b	b	a	a	h	h	h	h	a	h	h	h	h	b	h	h	a	h	b	h	h	h	h	a	b	h	h	h	h	a	b	h	b	b	h	h	a	b	b	h	h	h	b	h	h	b
Block12303	Chr.2	33409234	33452669	b	b	a	a	h	h	h	h	a	h	h	h	h	b	h	h	a	h	b	h	h	h	h	a	b	h	h	h	h	a	b	h	b	b	h	h	a	b	b	h	h	h	b	h	h	b
Block12304	Chr.2	33454838	33494986	b	b	a	a	h	h	h	h	a	h	h	h	h	b	h	h	a	h	b	h	h	h	h	a	b	h	h	h	h	a	b	h	b	b	h	h	a	b	b	h	h	h	b	h	h	b
Block12305	Chr.2	33505237	33539486	b	b	a	a	h	h	h	h	a	h	h	h	h	b	h	h	a	h	b	h	h	h	h	a	b	h	h	h	h	a	b	h	b	b	h	h	a	b	b	h	h	h	b	h	h	b
Block12306	Chr.2	33540950	33546482	b	b	a	a	h	h	h	h	a	h	h	h	h	b	h	h	a	h	b	h	h	h	h	a	b	h	h	h	h	a	b	h	b	b	h	h	a	b	b	h	h	h	b	h	h	b
Block12308	Chr.2	33549274	33594041	b	b	a	a	h	h	h	h	a	h	h	h	h	b	h	h	a	h	b	h	h	h	h	a	b	h	h	h	h	a	b	h	b	b	h	h	a	b	b	h	h	h	b	h	h	b
Block12309	Chr.2	33594486	34066974	b	b	a	a	h	h	h	h	a	h	h	h	h	b	h	h	a	h	b	h	h	h	h	a	b	h	h	h	h	a	b	h	b	b	h	h	a	b	b	h	h	h	b	h	h	b
Block12311	Chr.2	34083029	34161532	b	b	a	a	h	h	h	h	a	h	h	h	h	b	h	h	a	h	b	h	h	h	h	a	b	h	h	h	h	a	b	h	b	b	h	h	a	b	b	h	h	h	b	h	h	b
Block12312	Chr.2	34179245	34362581	b	b	a	a	h	h	h	h	a	h	h	h	h	b	h	h	a	h	b	h	h	h	h	a	b	h	h	h	h	a	b	h	b	b	h	h	a	b	b	h	h	h	b	h	h	b
Block12313	Chr.2	34366047	34463898	b	b	a	a	h	h	h	h	a	h	h	h	h	b	h	h	a	h	b	h	h	h	h	a	b	h	h	h	h	a	b	h	b	b	h	h	a	b	b	h	h	h	b	h	h	b
Block12315	Chr.2	34491992	34522894	b	b	a	a	h	h	h	h	a	h	h	h	h	b	h	h	a	h	b	h	h	h	h	a	b	h	h	h	h	a	b	h	b	b	h	h	a	b	b	h	h	h	b	h	h	b
Block12317	Chr.2	34570879	34597008	b	b	a	a	h	h	h	h	a	h	b	b	h	b	h	h	a	h	b	h	h	h	h	a	b	h	h	h	h	a	b	h	b	b	h	h	a	b	b	h	h	h	b	h	h	b
Block12321	Chr.2	34641431	34700308	b	b	a	a	h	h	h	h	a	h	b	b	h	b	h	h	a	h	b	h	h	h	h	a	b	h	h	h	h	a	b	h	b	b	h	h	a	b	b	h	h	h	b	h	h	b
Block12322	Chr.2	34700875	34727018	b	b	a	a	h	h	h	h	a	h	b	b	h	b	h	h	a	h	b	h	h	h	h	a	b	h	h	h	h	a	b	h	b	b	h	h	a	b	b	h	h	h	b	h	h	b
Block12323	Chr.2	34747796	34792924	b	b	a	a	h	h	h	h	a	h	b	b	h	b	h	h	a	h	b	h	h	h	h	a	b	h	h	h	h	a	b	h	b	b	h	h	a	b	b	h	h	h	b	h	h	b
Block12325	Chr.2	34797327	34814657	b	b	a	a	h	h	h	h	a	h	b	b	h	b	h	h	a	h	b	h	h	h	h	a	b	h	h	h	h	a	b	h	b	b	h	h	a	b	b	h	h	h	b	h	h	b
Block12327	Chr.2	34818918	34833663	b	b	a	a	h	h	h	h	a	h	b	b	h	b	h	h	a	h	b	h	h	h	h	a	b	h	h	h	h	a	b	h	b	b	h	a	a	b	b	h	h	h	b	h	h	b
Block12330	Chr.2	34836521	34850497	b	b	a	a	h	h	h	h	a	h	b	b	h	b	h	h	a	h	b	h	h	h	h	a	b	h	h	h	h	a	b	h	b	b	h	a	a	b	b	h	h	h	b	h	h	b
Block12333	Chr.2	34858213	34877083	b	b	a	a	h	h	h	h	a	h	b	b	a	b	h	h	a	h	b	h	h	h	h	a	b	h	h	h	h	a	b	h	b	b	h	a	a	b	b	h	h	h	b	h	h	b
Block12334	Chr.2	34883204	34913591	b	b	a	a	h	h	h	h	a	h	b	b	a	b	h	h	a	h	b	h	h	h	h	a	b	h	h	h	h	a	b	h	b	b	h	a	a	b	b	h	h	h	b	h	h	b
Block12335	Chr.2	34919259	34995540	b	b	a	a	h	h	h	h	a	h	b	b	a	b	h	h	a	h	b	h	h	h	h	a	b	h	h	h	h	a	b	h	b	b	h	a	a	b	b	h	h	h	b	h	h	b
Block12336	Chr.2	35002459	35024797	b	b	a	a	h	h	h	h	a	h	b	b	a	b	h	a	a	h	b	h	h	h	h	a	b	h	h	h	h	a	b	h	b	b	h	a	a	b	b	h	h	h	b	h	h	b
Block12339	Chr.2	35025147	35038867	b	b	a	a	h	h	h	h	a	h	b	b	h	b	h	h	a	h	b	h	h	h	h	a	b	h	h	a	h	a	b	h	b	b	h	h	a	b	b	h	h	h	b	h	a	b
Block12362	Chr.2	35074805	35082310	b	b	a	a	h	a	h	h	a	h	b	b	h	b	h	h	a	h	b	h	h	h	h	a	b	h	h	h	h	a	b	h	b	b	h	h	a	b	b	h	h	a	b	h	h	b
Block12403	Chr.2	35118632	35124386	b	b	a	a	a	h	h	h	a	h	b	b	h	b	h	h	a	h	b	h	h	h	h	a	b	a	h	h	h	a	b	a	b	b	h	h	a	b	b	h	h	a	b	h	h	b
Block12414	Chr.2	35134463	35140813	b	b	a	a	h	h	h	h	a	h	b	b	h	b	h	a	a	h	b	h	h	h	a	a	b	h	h	h	h	a	b	h	b	b	h	h	a	b	b	a	h	h	b	h	h	b
Block12422	Chr.2	35174590	35191388	b	b	a	a	h	h	h	h	a	h	b	b	h	b	h	a	a	h	b	h	h	h	a	a	b	h	h	h	h	a	b	h	b	b	h	h	a	b	b	h	h	h	b	h	h	b
Block12424	Chr.2	35196080	35204900	b	b	a	a	h	h	h	h	a	h	b	b	h	b	h	h	a	h	h	h	h	h	a	a	b	h	h	h	h	a	b	h	b	b	h	h	a	b	b	h	h	h	b	h	h	b
Block12430	Chr.2	35217690	35229971	b	b	a	a	h	h	h	h	a	h	b	b	h	b	h	h	a	h	h	h	h	h	a	a	b	h	h	h	h	a	b	h	b	b	h	h	a	b	b	h	h	h	b	h	h	b
Block12431	Chr.2	35234828	35240677	b	b	a	a	h	h	h	h	a	h	b	b	h	b	h	h	a	h	h	h	h	h	a	a	b	h	h	h	h	a	b	h	b	b	h	h	a	b	b	h	h	h	b	h	h	b
Block12432	Chr.2	35250539	35259893	b	b	a	a	h	h	h	h	a	h	b	b	h	b	h	h	a	h	h	h	h	h	a	a	b	h	h	h	h	a	b	h	b	b	h	h	a	b	b	h	h	h	b	h	h	b
Block12433	Chr.2	35260273	35315747	b	b	a	a	h	h	h	h	a	h	b	b	h	b	h	h	a	h	h	h	h	h	a	a	b	h	h	h	h	a	b	h	b	b	h	h	a	b	b	h	h	h	b	h	h	b
Block12436	Chr.2	35357191	35364544	b	b	a	a	h	h	h	a	a	h	b	b	h	b	h	h	a	h	h	h	h	h	a	a	b	h	h	h	h	a	b	h	b	b	h	h	a	b	b	h	h	h	b	h	h	b
Block12438	Chr.2	35370803	35408244	b	b	a	a	h	h	h	a	a	h	b	b	h	b	h	h	a	h	h	h	h	h	a	a	b	h	h	h	h	a	b	h	b	b	h	h	a	b	b	h	h	h	b	h	h	b
Block12439	Chr.2	35408603	35447430	b	b	a	a	h	h	h	a	a	h	b	b	h	b	h	h	a	h	h	h	h	h	a	a	b	h	h	h	h	a	b	h	b	b	h	h	a	b	b	h	h	h	b	h	h	b
Block12441	Chr.2	35463330	35512413	b	b	a	a	h	h	h	a	a	h	b	b	h	b	h	a	a	h	h	h	h	h	h	a	b	h	h	h	h	a	b	h	b	b	h	h	a	b	b	h	h	h	b	h	h	b
Block12444	Chr.2	35535834	35543164	b	b	a	a	h	h	h	h	a	h	b	b	h	b	h	a	a	b	h	h	h	h	h	a	b	h	h	a	h	a	b	a	b	b	h	h	a	b	b	h	h	h	b	h	h	b
Block12452	Chr.2	35549123	35554391	b	b	a	a	h	h	h	h	a	h	b	b	h	b	h	h	a	b	h	h	h	h	h	a	b	h	a	h	a	a	b	h	b	b	h	h	a	b	b	h	h	h	b	h	a	b
Block12476	Chr.2	35598698	35620479	b	b	a	a	h	h	h	h	a	h	b	b	h	b	h	h	a	b	h	h	h	h	h	a	b	h	a	h	a	a	b	h	b	b	h	h	a	b	b	h	h	h	b	h	a	b
Block12477	Chr.2	35622494	35689772	b	b	a	a	h	h	h	h	a	h	b	b	h	b	h	h	a	b	h	h	h	h	a	a	b	h	h	h	a	a	b	h	b	b	h	h	a	b	b	a	h	h	b	h	h	b
Block12512	Chr.2	35700140	35708609	b	b	a	a	h	h	a	h	a	h	b	b	h	b	h	h	a	b	h	h	h	h	a	a	b	h	h	h	h	a	b	a	b	b	h	h	a	b	b	h	h	h	b	h	h	b
Block12542	Chr.2	35728978	35735531	b	b	a	a	h	h	h	h	a	h	b	b	h	b	h	a	a	b	h	h	h	h	h	a	b	h	h	h	h	a	b	a	b	b	h	h	a	b	b	h	h	h	b	h	h	b
Block12545	Chr.2	35740991	35754557	b	b	a	a	h	h	h	h	a	h	b	b	h	b	h	a	a	b	h	h	h	h	h	a	b	h	h	a	h	a	b	h	b	b	h	h	a	b	b	h	h	h	b	h	h	b
Block12548	Chr.2	35757364	35763619	b	b	a	a	h	h	h	h	a	h	b	b	h	b	h	h	a	b	h	h	h	h	h	a	b	h	h	h	h	a	b	h	b	b	h	h	a	b	b	h	h	a	b	h	h	b
Block12558	Chr.2	35776467	35784011	b	b	a	a	h	h	h	h	a	h	b	b	h	b	h	h	a	b	h	h	h	h	h	a	b	h	h	h	h	a	b	h	b	b	h	h	a	b	b	h	h	a	b	h	h	b
Block12560	Chr.2	35785830	35926709	b	b	a	a	h	h	h	h	a	h	b	b	h	b	h	h	a	b	h	h	h	h	h	a	b	h	h	h	h	a	b	a	b	b	h	h	a	b	b	h	h	a	b	h	h	b
Block12561	Chr.2	35929182	36116695	b	b	a	a	h	h	h	h	a	h	b	b	h	b	h	h	a	b	h	h	h	h	h	a	b	h	h	h	h	a	b	a	b	b	b	h	a	b	b	h	h	a	b	h	h	b
Block12562	Chr.2	36131785	36168023	b	b	a	a	h	h	h	h	a	a	b	b	h	b	h	h	a	b	h	h	h	h	h	a	b	h	h	h	h	a	b	h	b	b	b	h	a	b	b	h	h	h	b	h	h	b
Block12595	Chr.2	36196596	36210038	b	b	a	a	h	h	h	h	a	h	b	b	h	b	h	h	a	b	h	h	h	h	a	a	b	a	h	h	h	a	b	h	b	b	b	h	a	b	b	h	h	h	b	a	h	b
Block12609	Chr.2	36219899	36235344	b	b	a	a	h	h	h	h	a	h	b	b	h	b	h	h	a	b	h	h	h	h	h	a	b	h	h	h	h	a	b	h	b	b	b	h	a	b	b	h	h	h	b	h	h	b
Block12614	Chr.2	36236947	36242399	b	b	a	a	h	h	h	h	a	h	b	b	h	b	h	h	a	b	h	h	a	h	h	a	b	h	h	h	h	a	b	h	b	b	b	h	a	b	b	h	h	h	b	h	h	b
Block12618	Chr.2	36245685	36251050	b	b	a	a	h	h	h	h	a	h	b	b	h	b	h	h	a	b	h	h	a	h	h	a	b	a	h	h	h	a	b	h	b	b	b	h	a	b	b	h	h	h	b	h	a	b
Block12620	Chr.2	36253531	36262331	b	b	a	a	h	h	h	h	a	h	b	b	h	b	h	h	a	b	h	h	h	h	a	a	b	h	h	h	h	a	b	h	b	b	b	h	a	b	b	h	h	h	b	h	a	b
Block12640	Chr.2	36291282	36297369	b	b	a	a	h	h	h	h	a	h	b	b	h	b	h	h	a	b	h	h	h	h	a	a	b	h	h	h	h	a	b	h	b	b	b	h	a	b	b	h	h	h	b	h	a	b
Block12643	Chr.2	36298379	36311675	b	b	a	a	h	h	h	h	a	h	b	b	h	b	h	h	a	b	h	h	h	h	a	a	b	h	h	h	h	a	b	h	b	b	b	h	a	b	b	h	h	h	b	h	h	b
Block12645	Chr.2	36312508	36322570	b	b	a	a	h	h	h	h	a	h	b	b	h	b	h	h	a	b	h	h	h	h	h	a	b	h	h	h	h	a	b	h	b	b	b	h	a	b	b	h	h	h	b	h	h	b
Block12647	Chr.2	36323962	36329132	b	b	a	a	h	h	h	h	a	h	b	b	h	b	h	h	a	b	h	h	h	h	h	a	b	h	h	h	h	a	b	h	b	b	b	h	a	b	b	h	h	h	b	h	h	b
Block12649	Chr.2	36330870	36337052	b	b	a	a	h	h	h	h	a	h	b	b	h	b	h	h	a	b	h	h	h	h	h	a	b	h	h	h	h	a	b	h	b	b	b	h	a	b	b	h	h	h	b	h	h	b
Block12651	Chr.2	36341675	36349089	b	b	a	a	h	h	h	h	a	h	b	b	h	b	h	h	a	b	h	h	h	h	h	a	b	h	h	h	h	a	b	h	b	b	b	h	a	b	b	h	h	h	b	h	h	b
Block12652	Chr.2	36349355	36355749	b	b	a	a	h	h	h	h	a	h	b	b	h	b	h	h	a	b	h	h	h	h	h	a	b	h	h	h	h	a	b	h	b	b	b	h	a	b	b	h	h	h	b	h	h	b
Block12675	Chr.2	36380600	36386053	b	b	a	a	a	a	h	h	a	h	b	b	h	b	h	h	a	b	h	h	h	h	h	a	b	h	h	h	h	a	b	h	b	b	b	h	a	b	b	h	h	a	b	h	h	b
Block12682	Chr.2	36391515	36398955	b	b	a	a	h	h	h	h	a	h	b	b	h	b	h	h	a	b	h	h	h	h	h	a	b	h	h	h	h	a	b	h	b	b	b	h	a	b	b	h	h	h	b	h	h	b
Block12690	Chr.2	36409424	36414471	b	b	a	a	h	h	h	h	a	h	b	b	h	b	h	h	a	b	h	h	h	h	h	a	b	h	h	h	h	a	b	h	b	b	b	h	a	b	b	h	h	h	b	h	a	b
Block12728	Chr.2	36445805	36461003	b	b	a	a	h	h	h	h	a	h	b	b	h	b	h	h	a	b	h	h	h	h	h	a	b	h	h	h	h	a	b	h	b	b	b	h	a	b	b	h	h	h	b	h	a	b
Block12734	Chr.2	36707671	36928866	b	b	a	a	h	h	h	h	a	h	b	b	h	b	h	h	a	b	h	h	h	h	h	a	b	h	h	h	h	a	b	h	b	b	b	h	a	b	b	h	h	h	b	h	a	b
Block12737	Chr.2	37257601	37378130	b	b	a	a	h	h	h	h	a	h	b	b	h	b	h	h	a	b	h	h	h	h	h	b	b	h	h	h	h	a	b	h	b	b	b	h	a	b	b	h	h	h	b	h	a	b
Block12740	Chr.2	37589667	37673466	b	b	a	a	h	h	h	h	a	h	b	b	h	b	h	h	a	b	h	h	h	h	h	b	b	h	b	h	h	a	b	h	b	b	b	h	a	b	b	h	h	h	b	h	a	b
Block12742	Chr.2	37679043	37758751	b	b	a	a	h	h	h	h	a	h	b	b	h	b	h	h	a	b	h	h	h	h	h	b	b	h	b	h	h	a	b	h	b	b	b	h	a	b	b	h	h	h	b	h	a	b
Block12743	Chr.2	37762893	37858590	b	b	a	a	h	h	h	h	a	h	b	b	h	b	h	h	a	b	h	h	h	h	h	b	b	h	b	h	h	h	b	h	b	b	b	h	a	b	b	h	h	h	b	h	a	b
Block12744	Chr.2	37875187	37916168	b	b	a	a	h	h	h	h	a	h	b	b	h	b	h	h	a	b	h	h	h	h	h	b	b	h	b	h	h	h	b	h	b	b	b	h	a	b	b	h	h	h	b	h	a	b
Block12747	Chr.2	37917239	37925363	b	b	a	a	h	h	h	h	h	h	b	b	h	b	h	h	a	b	h	h	h	h	h	b	b	h	b	h	h	h	b	h	b	b	b	h	h	b	b	h	h	h	b	h	a	b
Block12755	Chr.2	37943282	37953095	b	b	a	a	h	h	h	h	h	h	b	b	h	b	h	h	a	b	h	h	h	h	h	b	b	h	b	h	h	h	b	h	b	b	b	h	h	b	b	h	h	h	b	h	a	b
Block12769	Chr.2	37975413	37996272	b	b	a	a	h	h	h	h	h	h	b	b	h	b	h	h	a	b	h	h	h	h	h	b	b	h	b	h	h	h	b	h	b	b	b	h	h	b	b	h	h	h	b	h	a	b
Block12770	Chr.2	37998478	38013660	b	b	a	a	h	h	h	h	h	h	b	b	h	b	h	h	a	b	h	h	h	h	h	b	b	h	b	h	h	h	b	h	b	b	b	h	h	b	b	h	h	h	b	h	a	b
Block12771	Chr.2	38016523	38032169	b	b	a	a	h	h	h	h	h	h	b	b	h	b	h	h	a	b	h	h	h	h	h	b	b	h	b	h	h	h	b	h	b	b	b	h	h	b	b	h	h	h	b	h	a	b
Block12772	Chr.2	38037377	38159833	b	b	a	a	h	h	h	h	h	h	b	b	h	b	h	h	a	b	h	h	h	h	h	b	b	h	b	h	h	h	b	h	b	b	b	h	h	b	b	h	h	h	b	h	a	b
Block12773	Chr.2	38160204	38206934	b	b	a	a	h	h	h	h	h	h	b	b	h	b	h	h	a	b	h	h	h	h	h	b	b	h	b	h	h	h	b	h	b	b	b	h	h	b	b	h	h	h	b	h	a	b
Block12790	Chr.2	38255001	38327682	b	b	a	a	h	h	h	h	h	h	h	h	h	b	h	h	a	b	h	h	h	h	h	b	b	h	b	h	h	h	b	h	b	b	b	h	h	b	b	h	h	h	b	h	a	b
Block12797	Chr.2	38329833	38338503	b	b	a	a	h	h	h	h	h	h	h	h	h	b	h	h	a	b	h	h	h	h	h	b	b	h	b	h	h	h	b	h	b	b	b	h	h	h	b	h	h	h	b	h	a	b
Block12798	Chr.2	38339906	38378045	b	b	a	h	h	h	h	h	h	h	h	h	h	b	h	h	a	b	h	h	h	h	h	b	b	h	b	h	h	h	b	h	b	b	b	h	h	h	b	h	h	h	b	h	a	b
Block12799	Chr.2	38380747	38391014	b	b	a	h	h	h	h	h	h	h	h	h	h	b	h	h	a	b	h	h	h	h	h	b	b	h	b	h	h	h	b	h	b	b	b	h	h	h	b	h	h	h	b	h	a	b
Block12800	Chr.2	38396263	38570920	b	b	a	h	h	h	h	h	h	h	h	h	h	b	h	h	a	b	h	h	h	h	h	b	b	h	b	h	h	h	b	h	b	b	b	h	h	h	b	h	h	h	b	h	a	b
Block12801	Chr.2	38572503	38631417	b	b	a	h	h	h	h	h	h	h	h	h	h	b	h	h	a	b	h	h	h	h	h	b	b	h	b	h	h	h	b	h	b	b	b	h	h	h	b	h	h	h	b	h	a	b
Block12802	Chr.2	38632228	38653715	b	b	a	h	h	h	h	h	h	h	h	h	h	b	h	h	a	b	h	h	h	h	h	b	b	h	b	h	h	h	b	h	b	b	b	h	h	h	b	h	h	h	b	h	a	b
Block12804	Chr.2	38667955	38800658	b	b	a	h	h	h	h	h	h	h	h	h	h	b	h	h	a	b	h	h	h	h	h	b	b	h	b	h	h	h	b	h	b	b	b	h	h	h	b	h	h	h	b	h	a	b
Block12805	Chr.2	38806352	38816156	b	b	a	h	h	h	h	h	h	h	h	h	h	b	h	h	a	b	h	h	h	h	h	b	b	h	b	h	h	h	b	h	b	b	b	h	h	h	b	h	h	h	b	h	a	b
Block12807	Chr.2	38832594	38901328	b	b	a	h	h	h	h	h	h	h	h	h	h	b	h	h	a	b	h	h	h	h	h	b	b	h	b	h	h	h	b	h	b	b	b	h	h	h	b	h	h	a	b	h	a	b
Block12808	Chr.2	38910361	38990562	b	b	a	h	h	h	h	h	h	h	h	h	h	b	h	h	a	b	h	h	h	h	h	b	b	h	b	h	h	h	b	h	b	b	b	h	h	h	b	h	h	a	b	h	a	b
Block12809	Chr.2	38995174	39051244	b	b	a	h	h	h	h	h	h	a	h	h	h	b	h	h	a	b	h	h	h	h	h	b	b	h	b	h	h	h	b	h	b	b	b	h	h	h	b	h	h	a	b	h	a	b
Block12810	Chr.2	39051469	39064844	b	b	a	h	h	h	h	h	h	a	h	h	h	b	h	h	a	b	a	h	h	a	h	h	b	h	b	b	h	h	b	h	h	b	b	a	h	a	b	a	h	a	b	h	h	b
Block12922	Chr.2	41329607	41335314	a	b	a	h	h	h	h	h	h	a	h	h	h	b	h	h	a	b	a	h	h	a	h	h	b	h	b	b	h	h	b	h	h	b	b	a	h	a	b	a	h	a	b	h	h	b
Block12923	Chr.2	41336439	41343055	h	b	a	h	h	h	h	h	h	a	h	h	h	b	h	h	a	b	a	h	h	a	h	h	b	h	b	b	h	h	b	h	h	b	b	a	h	h	b	a	h	a	b	h	h	b
Block12932	Chr.2	41357465	41364537	h	b	a	h	h	h	h	h	h	a	h	h	h	b	h	h	a	b	a	h	h	a	h	h	b	h	b	b	h	h	b	h	h	b	b	a	h	h	b	a	h	a	b	h	h	b
Block12933	Chr.2	41364559	41374502	h	b	a	h	h	h	h	h	h	a	h	h	h	b	h	h	a	b	a	h	h	a	h	h	b	h	b	b	h	h	b	h	h	b	b	a	h	h	b	a	h	a	b	h	h	b
Block12934	Chr.2	41374515	41383634	h	b	a	h	h	h	h	h	h	a	h	h	h	b	h	h	a	b	a	h	h	a	h	h	b	h	b	b	h	h	b	h	h	b	b	a	h	h	b	a	h	a	b	h	h	b
Block12943	Chr.2	41395950	41406764	h	b	a	h	h	h	h	h	h	a	h	h	h	b	h	h	a	b	a	h	h	a	h	h	b	h	b	b	h	h	b	h	h	b	b	a	h	h	b	a	h	a	b	h	h	b
Block12945	Chr.2	41408614	41436934	h	b	a	h	h	h	h	h	h	a	h	h	h	b	h	h	a	b	a	h	h	a	h	h	b	h	b	b	h	h	b	a	h	b	b	a	h	h	b	a	h	a	b	h	a	b
Block12954	Chr.2	41445450	41454388	h	b	a	h	h	h	h	h	h	a	a	h	h	b	h	h	a	b	a	h	h	a	h	h	b	h	b	b	h	h	b	h	h	b	b	a	h	h	b	a	h	a	b	a	a	b
Block13042	Chr.2	41489920	41496440	h	b	a	h	h	h	h	h	a	a	a	h	h	b	h	h	a	b	a	h	h	a	h	h	b	h	b	b	h	h	b	h	h	b	b	a	a	h	b	a	h	a	b	h	h	b
Block13058	Chr.2	41508300	41514354	h	b	a	h	h	h	h	h	h	a	h	h	h	b	h	a	a	b	a	h	h	a	h	h	b	h	b	b	a	h	b	a	h	b	b	a	h	h	b	a	h	a	b	h	h	b
Block13165	Chr.2	41565538	41579442	h	b	a	h	h	h	h	h	h	a	h	h	h	b	h	h	a	b	a	h	h	a	h	h	b	h	b	b	h	h	b	h	h	b	b	a	h	h	b	a	h	a	b	h	h	b
Block13180	Chr.2	41593770	41599371	h	b	a	h	h	h	h	h	h	a	h	h	h	b	h	h	a	b	a	h	h	a	h	h	b	h	b	b	h	h	b	h	h	b	b	a	h	h	b	a	h	a	b	h	a	b
Block13184	Chr.2	41603021	41608581	h	b	a	h	h	h	h	h	h	a	a	h	h	b	h	h	a	b	a	a	h	a	h	h	b	h	b	b	h	h	b	h	h	b	b	a	h	h	b	a	h	a	b	h	a	b
Block13218	Chr.2	41632596	41641091	h	b	a	h	a	h	h	h	b	a	a	a	h	b	h	a	a	b	a	a	b	a	a	b	b	b	b	b	h	h	b	h	h	b	b	a	h	h	b	a	a	a	h	h	h	b
Block13985	Chr.2	43703026	43710597	a	b	a	h	a	h	h	h	b	a	a	a	h	b	h	a	a	b	a	a	b	a	a	b	b	b	b	b	h	h	b	h	h	b	b	a	a	h	b	a	a	a	h	h	h	b
Block14131	Chr.2	43955351	43962519	a	b	a	h	a	h	h	h	b	a	a	a	h	b	h	a	a	b	a	a	b	a	a	b	b	b	b	b	h	h	b	h	h	b	b	a	a	h	b	a	a	a	h	h	h	b
Block14132	Chr.2	43968379	43991463	a	b	a	h	a	h	h	h	b	a	a	a	h	b	h	a	a	b	a	a	b	a	a	b	b	b	b	b	h	h	b	h	h	b	b	a	a	h	b	a	a	a	h	h	h	b
Block14134	Chr.2	44064285	44073307	a	b	a	h	h	h	h	h	b	a	a	a	h	b	h	a	a	b	a	a	b	a	a	b	b	b	b	b	h	h	b	h	h	b	b	a	a	h	b	a	a	a	h	h	h	b
Block14135	Chr.2	44077527	44160189	a	b	a	h	h	h	h	h	b	a	a	a	h	b	h	a	a	b	a	a	b	a	a	b	b	b	b	b	h	h	b	h	h	b	b	a	a	h	b	a	a	a	h	h	h	b
Block14136	Chr.2	44166339	44188186	a	b	a	h	h	h	h	h	h	a	a	a	h	b	h	a	a	b	a	a	b	a	a	b	b	b	b	b	h	h	b	h	h	b	b	a	a	h	b	a	a	a	h	h	h	b
Block14137	Chr.2	44206379	44243127	a	b	a	h	h	h	h	h	h	a	a	a	h	b	h	a	a	b	a	a	b	a	a	b	b	b	b	b	h	h	b	h	h	b	b	a	a	h	b	a	a	a	h	h	h	b
Block14140	Chr.2	44253268	44377157	a	b	a	h	h	h	h	h	h	a	a	a	h	b	h	a	a	b	a	a	b	a	a	b	b	b	b	b	h	h	b	h	h	b	b	a	h	h	b	a	a	a	h	a	a	b
Block14150	Chr.2	44389907	44438231	a	b	a	h	h	h	h	h	h	a	a	a	h	b	h	a	a	b	a	a	b	a	a	b	b	b	b	b	h	h	b	h	h	b	b	a	h	h	b	a	a	a	h	h	a	b
Block14153	Chr.2	44444665	44451495	a	b	a	h	h	h	h	h	h	a	a	a	h	b	h	a	a	b	a	a	b	a	a	b	b	b	b	b	h	h	b	h	h	b	b	a	h	h	b	a	a	a	h	h	a	b
Block14154	Chr.2	44453533	44458764	a	b	a	h	h	h	h	h	h	a	a	a	h	b	h	a	a	b	a	a	b	a	a	b	b	b	b	b	h	h	b	h	h	b	b	a	h	h	b	a	a	a	h	h	h	b
Block14155	Chr.2	44458812	44500621	a	b	a	h	h	h	h	h	h	a	a	a	h	b	h	a	a	b	a	a	b	a	a	b	b	b	b	b	h	h	b	h	h	b	b	a	h	h	b	a	a	a	h	h	h	b
Block14158	Chr.2	44515141	44522181	a	b	a	h	h	h	h	h	h	a	a	a	h	b	h	a	a	b	a	a	b	a	a	b	b	b	b	b	h	h	b	h	h	b	b	a	h	h	b	a	a	a	h	h	h	b
Block14162	Chr.2	44532263	44545902	a	b	a	h	h	h	h	h	h	a	a	a	h	b	h	a	a	b	a	a	b	a	a	b	b	b	b	b	h	h	b	h	h	b	b	a	h	h	b	a	a	a	h	h	h	b
Block14163	Chr.2	44551724	44561123	a	b	a	h	h	h	h	h	h	a	a	a	h	b	h	a	a	b	a	a	b	a	a	b	b	b	b	b	h	h	b	h	h	b	b	a	h	h	b	a	a	a	h	h	h	b
Block14164	Chr.2	44561146	44566639	a	b	a	h	h	h	h	h	h	a	a	a	h	b	h	a	a	b	a	a	b	a	a	b	b	b	b	b	h	h	b	h	h	b	b	a	h	a	b	a	a	a	h	h	h	b
Block14173	Chr.2	44575889	44581725	a	b	a	h	h	h	h	h	h	a	a	a	h	b	h	a	a	b	a	a	b	a	a	b	b	b	b	b	h	h	b	h	h	b	b	a	h	a	b	a	a	a	h	h	h	b
Block14179	Chr.2	44587697	44595854	a	b	a	h	h	h	h	h	h	a	a	a	h	b	h	a	a	b	a	a	b	a	a	b	b	b	b	b	h	h	b	h	h	b	b	a	a	h	b	a	a	a	h	a	h	b
Block14191	Chr.2	44610181	44621358	a	b	a	h	h	h	h	h	h	a	a	a	h	b	h	a	a	b	a	a	b	a	a	b	b	b	b	b	h	a	b	h	h	b	b	a	h	h	b	a	a	a	h	h	h	b
Block14197	Chr.2	44625505	44636667	a	b	a	h	h	h	h	h	h	a	a	a	h	b	h	a	a	b	a	a	b	a	a	b	b	b	b	b	a	h	b	h	h	b	b	a	h	h	b	a	a	a	h	h	h	b
Block14201	Chr.2	44640893	44646768	a	b	a	h	h	h	h	h	h	a	a	a	h	b	h	a	a	b	a	a	b	a	a	b	b	b	b	b	h	h	b	h	h	b	b	a	h	h	b	a	a	a	h	h	h	b
Block14202	Chr.2	44646942	44683217	a	b	a	h	h	h	h	h	h	a	a	a	h	b	h	a	a	b	a	a	b	a	a	b	b	b	b	b	h	h	b	h	h	b	b	a	h	h	b	a	a	a	h	h	h	b
Block14203	Chr.2	44683425	44706307	a	b	a	h	h	h	h	h	h	a	a	a	h	b	h	a	a	b	a	a	b	a	a	b	b	b	b	b	h	h	b	h	h	b	b	a	h	h	b	a	a	a	a	h	h	b
Block14204	Chr.2	44706539	44734162	a	b	a	h	h	h	h	h	h	a	a	a	h	b	h	a	a	b	a	a	b	a	a	b	b	b	b	b	h	h	b	h	h	b	b	a	h	h	b	a	a	a	h	h	h	b
Block14206	Chr.2	44737155	44746420	a	b	a	h	h	h	h	h	h	a	a	a	h	b	h	a	a	b	a	a	b	a	a	b	b	b	b	b	h	h	b	h	h	b	b	a	h	h	b	a	a	a	h	h	h	b
Block14291	Chr.2	44810716	44834583	a	b	a	h	h	h	h	h	h	a	a	a	h	b	h	a	a	b	a	a	b	a	a	b	b	b	b	h	h	h	b	h	h	b	b	a	h	h	b	a	a	a	h	h	h	b
Block14295	Chr.2	44888596	44971652	a	b	a	h	h	h	h	h	h	a	a	a	h	b	h	a	a	b	a	a	b	a	a	b	b	b	b	h	h	h	b	h	h	b	b	a	h	h	a	a	a	a	h	h	h	b
Block14298	Chr.2	45003992	45030526	a	h	a	h	h	h	h	h	h	a	a	a	h	b	h	a	a	b	a	a	b	a	a	b	b	b	b	h	h	h	b	h	h	b	b	a	h	h	a	a	a	a	h	h	h	b
Block14303	Chr.2	45087456	45120311	a	h	a	h	h	h	h	h	h	a	a	a	h	b	h	a	a	b	a	a	b	a	a	b	b	b	b	h	h	h	b	h	h	b	b	a	h	h	a	a	a	a	h	h	h	b
Block14304	Chr.2	45123434	45147002	a	h	a	h	h	h	h	h	h	a	a	a	h	b	h	a	a	b	a	a	b	a	a	b	b	b	b	h	h	h	b	h	h	b	b	a	h	h	a	a	a	a	h	h	h	b
Block14306	Chr.2	45149187	45156624	a	h	a	h	h	h	h	h	h	a	a	a	h	b	h	a	a	b	a	a	b	a	a	b	b	b	b	h	h	h	b	h	h	b	b	a	h	h	a	a	a	a	h	h	h	b
Block14309	Chr.2	45200040	45239593	a	h	a	h	h	h	h	h	h	a	a	a	h	b	h	a	a	b	a	a	b	a	a	b	b	b	b	h	h	h	b	h	h	b	b	a	h	h	a	a	a	a	h	h	h	b
Block14310	Chr.2	45249703	45276970	a	h	a	h	h	h	h	h	h	a	a	a	h	b	h	a	a	b	a	a	b	a	a	b	b	b	b	h	h	h	b	h	h	b	b	a	h	h	a	a	a	a	h	h	h	b
Block14312	Chr.2	45279322	45285067	a	h	a	h	h	h	h	h	h	a	a	a	h	b	h	a	a	b	h	a	h	a	a	b	b	b	b	h	h	h	b	h	h	b	b	a	h	h	a	a	a	a	h	h	h	b
Block14317	Chr.2	45363734	45377035	a	h	a	h	h	h	h	h	h	a	a	a	h	b	h	a	a	b	h	a	h	a	a	b	b	b	b	h	h	h	b	h	h	b	b	a	h	h	a	a	a	a	h	h	h	b
Block14318	Chr.2	45378254	45397113	a	h	a	h	h	h	h	h	h	a	a	a	h	b	h	a	a	b	h	a	h	a	a	b	b	b	b	h	h	h	b	h	h	b	b	a	h	h	a	a	a	a	h	h	h	b
Block14320	Chr.2	45400339	45405366	a	h	a	h	h	h	h	h	h	a	a	a	h	b	h	a	a	b	h	a	h	a	a	b	b	b	b	h	h	h	b	h	h	b	b	a	h	h	a	a	a	a	h	h	h	b
Block14321	Chr.2	45406092	45413355	a	h	a	h	h	h	h	h	h	a	a	a	h	b	h	a	a	b	h	a	h	a	a	b	b	b	b	h	h	h	b	h	h	b	b	a	b	h	a	a	a	a	h	h	h	b
Block14323	Chr.2	45417637	45424716	a	h	a	h	h	h	h	h	h	a	a	a	h	b	h	a	a	b	h	a	h	a	a	b	b	b	b	h	h	h	b	b	h	b	b	a	b	h	a	a	a	a	h	h	h	b
Block14324	Chr.2	45425263	45440417	a	h	a	h	h	h	h	h	h	a	a	a	h	b	h	a	a	b	h	a	h	a	a	b	b	b	b	h	h	h	b	b	h	b	b	a	h	h	a	a	a	a	h	h	h	b
Block14337	Chr.2	45507176	45556432	a	h	a	h	h	h	h	h	h	a	a	a	h	b	h	a	a	b	h	a	h	a	a	b	b	b	h	h	b	h	b	h	h	b	b	a	h	h	a	a	a	a	h	h	h	b
Block14346	Chr.2	45567946	45574471	a	h	a	h	h	h	h	h	h	a	a	a	h	b	h	a	a	b	h	a	h	a	a	b	b	b	h	h	b	h	b	h	h	b	b	a	h	h	a	a	a	a	h	h	h	b
Block14348	Chr.2	45576916	45583732	a	h	a	h	h	h	h	h	h	a	a	a	h	b	h	a	a	b	h	a	h	a	a	b	b	b	h	h	b	a	b	h	h	b	b	a	h	h	a	a	a	a	h	h	h	b
Block14364	Chr.2	45610641	45954060	a	h	a	h	h	h	h	h	h	a	a	a	h	b	h	a	a	b	b	a	a	a	h	b	b	b	h	a	h	b	h	h	h	h	b	a	b	h	a	a	a	a	h	a	h	b
Block14396	Chr.2	46235043	46250560	a	h	a	b	b	h	h	h	h	a	a	a	h	b	h	a	a	b	b	a	a	a	h	b	b	b	h	a	h	b	h	h	h	h	b	a	b	h	a	a	a	a	h	a	h	b
Block14398	Chr.2	46254393	46267308	a	h	a	b	b	h	h	h	h	a	a	a	h	b	h	a	a	b	b	a	a	a	h	b	b	b	h	a	h	b	h	h	h	h	b	a	b	h	a	a	a	a	h	a	h	b
Block14412	Chr.2	46308939	46326833	a	h	a	b	b	h	h	h	h	a	a	a	h	b	h	a	a	b	b	a	a	a	h	b	b	b	h	a	h	b	h	h	a	h	b	a	b	h	a	a	a	a	h	a	h	b
Block14420	Chr.2	46343750	46349985	a	h	a	b	b	h	h	h	h	a	a	a	h	b	h	a	a	b	b	a	a	a	h	b	b	b	h	a	h	b	h	h	h	h	b	a	b	h	a	a	a	a	h	a	h	b
Block14424	Chr.2	46353097	46360169	a	h	a	b	b	h	h	h	h	a	a	a	h	b	h	a	a	b	b	a	a	a	h	b	b	b	h	a	h	b	h	h	h	h	b	a	b	a	a	a	a	a	h	a	h	b
Block14426	Chr.2	46362931	46371850	a	h	a	b	b	h	h	h	h	a	a	a	h	b	h	a	a	b	b	a	a	a	h	b	b	b	h	a	h	b	h	h	h	h	b	a	b	a	a	a	a	a	h	a	h	b
Block14428	Chr.2	46372212	46377448	a	h	a	b	b	h	h	h	h	a	a	a	h	b	h	a	a	b	b	a	a	a	h	b	b	b	h	a	h	b	h	h	h	h	b	a	b	h	a	a	a	a	h	a	h	b
Block14429	Chr.2	46377525	46387590	a	h	a	b	b	h	h	h	h	a	a	a	h	b	h	a	a	b	b	a	a	a	h	b	b	b	h	a	a	b	h	h	h	h	b	a	b	h	a	a	a	a	h	a	h	b
Block14434	Chr.2	46391379	46402397	a	h	a	b	b	h	h	h	h	a	a	a	h	b	h	a	a	b	b	a	a	a	h	b	b	b	h	a	h	b	h	h	h	h	b	a	b	h	a	a	a	a	h	a	h	b
Block14438	Chr.2	46405148	46424979	a	h	a	b	b	h	h	h	h	a	a	a	h	b	h	a	a	b	b	a	a	a	h	b	b	b	a	a	h	b	h	h	h	h	b	a	b	h	a	a	a	a	h	a	h	b
Block14441	Chr.2	46427607	46438411	a	h	a	b	b	h	h	h	h	a	a	a	h	b	h	a	a	b	b	a	a	a	h	b	b	b	a	a	h	b	h	h	h	h	b	a	b	h	a	a	a	a	h	a	a	b
Block14442	Chr.2	46439019	46445357	a	h	a	b	b	h	h	h	h	a	a	a	h	b	h	a	a	b	b	a	a	a	h	b	b	b	h	a	h	b	h	h	h	h	b	a	b	h	a	a	a	a	h	a	h	b
Block14482	Chr.2	46485562	46490707	a	h	a	b	b	h	h	a	h	a	a	a	h	b	h	a	a	b	b	a	a	a	h	b	b	b	h	a	h	b	h	h	h	h	b	a	b	h	a	a	a	a	h	a	h	b
Block14535	Chr.2	46549679	46565488	a	h	a	b	b	h	h	a	h	a	a	a	h	b	h	a	a	b	b	a	a	a	h	b	b	b	h	a	h	b	h	h	h	h	b	a	b	h	a	a	a	a	h	a	h	h
Block14536	Chr.2	46566500	46628548	a	h	a	b	b	h	h	a	h	a	a	a	h	b	h	a	a	b	b	a	a	a	h	b	b	b	h	a	h	b	a	h	h	h	b	a	b	h	a	a	a	a	h	a	h	h
Block14537	Chr.2	46629321	46866624	a	h	a	b	b	h	h	h	h	h	a	a	h	b	h	a	a	b	b	a	a	a	a	b	b	b	h	a	h	h	a	h	h	a	h	a	b	h	a	a	a	a	h	a	h	h
Block14583	Chr.2	47174442	47186768	a	h	a	b	b	h	h	h	h	h	a	a	h	b	h	a	a	b	b	a	a	a	a	b	b	b	h	a	h	h	a	h	h	a	h	a	b	h	a	a	a	a	h	a	h	h
Block14584	Chr.2	47200884	47238106	a	h	a	b	b	h	h	h	h	h	a	a	h	b	h	a	a	b	b	a	a	a	a	b	b	b	h	a	h	h	a	h	h	a	h	a	b	h	a	a	a	a	h	a	h	h
Block14585	Chr.2	47238540	47271098	a	h	a	b	b	h	h	h	h	h	a	a	h	b	h	a	a	b	b	a	a	a	a	b	b	b	h	a	h	h	a	h	h	a	h	a	b	h	a	a	a	a	h	a	h	h
Block14588	Chr.2	47293869	47312113	a	h	a	b	b	h	h	h	h	h	a	a	h	b	h	a	a	b	b	a	a	a	a	b	b	b	h	a	h	h	a	h	h	a	h	a	b	h	a	a	a	a	h	a	h	h
Block14589	Chr.2	47316538	47397994	a	h	a	b	b	h	h	h	h	h	a	a	h	b	h	h	a	b	b	a	a	a	a	b	b	b	h	a	h	h	a	h	h	a	h	a	b	h	a	a	a	a	h	a	h	h
Block14591	Chr.2	47438071	47450245	a	h	a	b	b	h	h	h	h	h	a	a	h	b	h	h	a	b	b	a	a	a	h	b	b	b	h	a	h	h	a	h	h	a	h	h	b	h	a	a	a	a	h	a	h	h
Block14601	Chr.2	47538844	47553265	a	h	a	b	b	h	h	h	h	h	a	a	h	b	h	h	a	b	b	a	a	a	h	b	b	b	h	a	h	h	a	h	h	a	h	h	b	h	a	a	a	a	h	a	h	h
Block14602	Chr.2	47570905	47606574	a	h	a	b	b	h	h	h	h	h	a	a	h	b	h	h	a	b	b	a	a	a	h	b	b	b	h	a	h	h	a	h	h	a	h	h	b	h	a	a	a	a	h	a	h	h
Block14603	Chr.2	47606777	47619446	a	h	a	b	b	h	h	b	h	h	a	a	h	b	h	h	a	b	b	a	a	a	h	b	b	b	h	a	h	h	a	h	h	a	h	h	b	h	a	a	a	a	h	a	h	h
Block14606	Chr.2	47619669	47631299	a	h	a	b	b	h	h	b	h	h	a	a	h	b	h	h	a	b	b	a	a	a	h	b	b	b	h	a	h	h	a	h	h	a	a	h	b	h	a	a	a	a	h	a	h	h
Block14607	Chr.2	47638080	47655092	a	h	a	b	b	h	h	b	h	h	a	h	h	b	h	h	a	b	b	a	a	a	h	b	b	b	h	a	h	h	a	h	h	a	a	h	b	h	a	a	a	a	h	a	h	h
Block14608	Chr.2	47655189	47664370	a	h	a	b	b	h	h	b	h	h	h	h	h	b	h	h	a	b	b	a	a	a	h	b	b	b	h	a	h	h	a	h	h	a	a	h	b	h	a	a	a	a	h	a	h	h
Block14609	Chr.2	47667132	47740541	a	h	a	b	b	h	h	b	h	h	h	h	h	b	h	h	a	b	b	h	a	a	h	b	b	b	h	a	h	h	a	h	h	a	a	h	b	h	a	a	a	a	h	a	h	h
Block14621	Chr.2	47751913	47780296	a	h	a	b	b	h	h	b	h	h	h	h	h	b	h	h	a	b	b	h	a	a	h	b	b	b	h	a	h	h	a	h	h	a	a	h	b	h	a	a	a	a	h	a	h	a
Block14625	Chr.2	47831152	47865908	a	h	a	b	b	h	h	b	h	h	h	h	h	b	h	h	b	b	b	h	a	a	h	b	b	b	h	a	h	h	a	h	h	a	a	h	b	h	a	a	a	a	h	a	h	a
Block14629	Chr.2	47877181	47893874	a	h	a	b	b	h	h	b	h	h	h	h	h	b	h	h	b	b	b	h	a	a	h	b	b	b	h	a	h	h	a	h	h	a	a	h	b	h	a	a	a	a	h	a	h	a
Block14630	Chr.2	47913912	47946285	a	h	a	b	b	h	h	b	h	h	h	h	h	b	h	h	b	b	b	h	a	a	h	b	b	b	h	a	h	h	a	h	h	a	a	h	b	h	a	a	a	a	h	a	h	a
Block14631	Chr.2	47946797	47986654	a	h	a	b	b	h	h	b	h	h	h	h	h	b	h	h	b	b	b	h	a	a	h	b	b	b	h	a	h	h	a	h	h	a	a	a	b	h	a	a	a	a	h	a	h	a
Block14632	Chr.2	47988597	48016442	a	h	a	b	b	h	h	b	h	h	h	h	h	b	h	h	b	b	b	h	a	a	h	b	b	b	h	a	h	h	a	h	h	a	a	a	b	h	a	a	a	a	h	a	h	a
Block14633	Chr.2	48017507	48034905	a	h	a	b	b	h	h	b	h	h	h	h	h	b	h	h	b	b	b	h	a	a	h	b	b	b	h	a	h	h	a	h	h	a	a	a	b	h	a	a	a	a	h	a	h	a
Block14634	Chr.2	48035499	48058770	a	h	a	b	b	h	h	b	h	h	h	h	h	b	h	h	b	b	b	h	a	a	h	b	b	b	h	a	h	h	a	h	h	a	a	a	b	h	a	a	a	a	h	a	h	a
Block14637	Chr.2	48062454	48146466	a	h	a	b	b	h	h	b	h	h	h	h	h	b	h	h	b	b	b	h	a	a	h	b	b	b	h	a	h	h	a	a	h	a	a	a	b	h	a	a	a	a	h	a	h	a
Block14642	Chr.2	48153581	48168067	a	h	a	b	b	h	h	b	h	h	h	h	h	b	h	h	b	b	b	h	a	a	h	b	b	b	h	a	h	h	a	a	a	a	a	a	b	h	a	a	a	a	h	a	h	a
Block14643	Chr.2	48169051	48177612	a	h	a	b	b	h	h	b	h	h	h	h	h	b	h	h	b	b	b	h	a	a	h	b	b	b	h	h	h	h	a	a	a	a	a	h	b	h	a	a	a	a	h	a	h	a
Block14658	Chr.2	48182896	48188342	a	a	a	b	b	h	h	b	h	h	h	h	h	b	h	h	b	b	b	h	a	a	h	b	b	b	h	h	h	h	a	a	a	a	a	h	b	h	a	a	a	a	h	a	h	a
Block14659	Chr.2	48193097	48209984	a	a	a	b	b	h	h	b	h	h	h	h	h	b	h	h	b	b	b	h	a	a	h	b	b	b	h	h	h	h	a	a	a	a	a	h	b	h	a	a	a	a	h	a	h	a
Block14660	Chr.2	48211161	48218806	a	a	a	b	b	h	h	b	h	h	h	h	h	b	h	h	b	b	b	h	a	a	h	b	b	b	h	h	h	h	a	a	a	a	a	h	b	h	a	a	a	a	h	a	h	a
Block14661	Chr.2	48219081	48227958	a	a	a	b	b	h	h	b	h	h	h	h	h	b	h	h	b	b	b	h	a	a	h	b	b	b	h	h	h	h	a	a	a	a	a	h	b	h	a	a	a	a	h	a	h	a
Block14662	Chr.2	48254618	48263555	a	a	a	b	b	h	h	b	h	h	h	h	h	b	h	h	b	b	b	h	a	a	h	b	b	b	h	h	h	h	a	a	a	a	a	h	b	h	a	a	a	a	h	a	h	a
Block14663	Chr.2	48273102	48303294	a	a	a	b	b	h	h	b	h	h	h	h	h	b	h	h	b	b	b	h	a	a	h	b	b	b	h	h	h	h	a	h	a	a	a	h	b	h	a	a	a	a	h	a	h	a
Block14665	Chr.2	48313341	48412267	a	h	a	b	b	h	h	b	h	h	h	h	h	b	h	h	b	b	b	h	a	a	h	b	b	b	h	h	h	h	a	h	a	a	a	h	b	a	a	a	a	a	h	a	h	a
Block14669	Chr.2	48520771	48542020	a	h	a	b	b	h	h	b	h	h	h	h	h	b	h	h	b	b	b	h	a	a	h	b	b	b	h	h	a	h	a	h	a	a	a	h	b	a	a	a	a	a	h	a	h	a
Block14678	Chr.2	48655313	48671810	a	h	a	b	b	h	h	b	a	h	h	a	h	b	h	a	b	b	b	a	a	a	h	b	b	b	h	h	a	h	a	h	a	a	a	h	b	h	a	a	a	a	a	a	a	a
Block14807	Chr.2	48745345	48752006	a	h	a	b	b	h	h	b	h	h	h	h	h	b	h	h	b	b	b	h	a	a	h	b	b	b	h	h	a	h	a	h	a	a	a	h	b	h	a	a	a	a	h	a	h	a
Block14852	Chr.2	48807557	48819077	a	h	a	b	b	h	h	b	h	h	h	h	h	b	h	h	b	b	b	h	a	a	h	b	b	b	h	h	a	h	a	h	a	a	a	h	b	h	a	a	a	a	h	a	h	a
Block14855	Chr.2	48822563	48830968	a	h	a	b	b	h	h	b	h	h	h	h	h	b	h	h	b	b	b	h	a	a	h	b	b	b	h	a	a	h	a	h	a	a	a	h	b	h	a	a	a	a	h	a	h	a
Block14857	Chr.2	48832992	48841196	a	h	a	b	b	h	h	b	h	h	a	h	h	b	h	a	b	b	b	a	a	a	h	b	b	b	h	h	a	h	a	h	a	a	a	h	b	h	a	a	a	a	h	a	h	a
Block14892	Chr.2	48868683	48885014	a	h	a	b	b	a	h	b	h	h	a	h	h	b	h	a	b	b	b	h	a	a	h	b	b	b	h	h	a	h	a	h	a	a	a	h	b	h	a	a	a	a	h	a	h	a
Block14893	Chr.2	48889522	48942126	a	h	a	b	b	a	h	b	h	h	a	h	h	b	h	a	b	b	b	h	a	a	h	b	b	b	h	h	a	h	a	h	a	a	a	h	b	h	a	a	a	a	h	a	h	a
Block14895	Chr.2	48943653	48948896	a	h	a	b	b	a	h	b	h	h	h	h	h	b	h	h	b	b	b	h	a	a	h	b	b	b	h	h	a	h	a	h	a	a	a	h	b	a	a	a	a	a	h	a	h	a
Block14905	Chr.2	48979708	48985364	a	h	a	b	b	h	h	b	h	h	h	h	h	b	h	h	b	b	b	h	a	a	h	b	b	b	h	h	a	h	a	h	a	a	a	h	b	h	a	a	a	a	h	a	h	a
Block14908	Chr.2	48987626	49072783	a	h	a	b	b	h	h	b	h	h	h	h	h	b	h	h	b	b	b	h	a	a	h	b	b	b	h	h	a	h	a	h	a	a	a	h	b	h	a	a	a	a	h	a	h	a
Block14911	Chr.2	49074905	49084783	a	h	a	b	b	h	h	b	h	h	h	h	h	b	h	h	b	b	b	h	a	a	h	b	b	b	h	a	a	h	a	h	a	a	a	h	b	h	a	a	a	a	h	a	h	a
Block14915	Chr.2	49087928	49093632	a	h	a	b	b	h	h	b	h	h	h	h	h	b	h	h	b	b	b	h	a	a	h	b	b	b	h	a	a	h	a	h	a	a	a	a	b	h	a	a	a	a	h	a	h	a
Block14916	Chr.2	49094226	49104275	a	h	a	b	b	h	h	b	h	h	h	h	h	b	h	h	b	b	b	h	a	a	h	b	b	b	h	h	a	h	a	h	a	a	a	a	b	h	a	a	a	a	h	a	h	a
Block14917	Chr.2	49105120	49116222	a	h	a	b	b	h	h	b	h	h	h	h	h	b	h	h	b	b	b	h	a	a	h	b	b	b	h	h	a	h	a	h	a	a	a	h	b	h	a	a	a	a	a	a	h	a
Block14920	Chr.2	49118188	49128686	a	h	a	b	b	h	h	b	h	h	h	a	h	b	h	h	b	b	b	h	a	a	h	b	b	b	h	h	a	h	a	h	a	a	a	h	b	h	a	a	a	a	a	a	h	a
Block14921	Chr.2	49129263	49135554	a	h	a	b	b	h	h	b	h	h	h	a	h	b	h	h	b	b	b	h	a	a	h	b	b	b	h	h	a	h	a	h	a	a	a	h	b	h	a	a	a	a	h	a	h	a
Block14923	Chr.2	49137739	49146269	a	h	a	b	b	h	h	b	h	h	h	h	h	b	h	h	b	b	b	h	a	a	h	b	b	b	h	h	a	h	a	h	a	a	a	h	b	h	a	a	a	a	h	a	h	a
Block14928	Chr.2	49149268	49154375	a	h	a	b	b	h	h	b	h	a	h	h	h	b	h	h	b	b	b	h	a	a	h	b	b	b	a	h	a	h	a	h	a	a	a	h	b	h	a	a	a	a	h	a	h	a
Block14939	Chr.2	49168525	49175160	a	h	a	b	b	h	h	b	h	a	h	h	h	b	h	h	b	b	b	h	a	a	h	b	b	b	h	h	a	h	a	h	a	a	a	h	b	h	a	a	a	a	h	a	h	a
Block14941	Chr.2	49180557	49199582	a	h	a	b	b	h	h	h	h	a	h	h	h	a	h	a	h	h	h	a	h	h	h	a	h	h	h	a	h	a	a	h	h	h	a	h	h	a	h	a	a	h	h	h	a	h
Block14942	Chr.3	8330	272125	h	h	a	h	h	h	h	h	b	a	b	b	h	a	a	a	a	b	h	h	b	b	h	a	h	h	b	b	h	h	a	h	b	b	a	b	h	b	h	a	b	h	b	h	h	h
Block15407	Chr.3	1528481	1534303	h	h	a	b	h	h	b	h	b	a	b	b	h	a	a	a	a	b	h	h	b	b	h	a	h	h	b	b	h	h	a	h	b	b	a	b	h	b	h	a	b	h	b	h	h	h
Block15424	Chr.3	1552105	1559953	h	h	a	b	h	h	b	h	b	a	b	b	h	a	a	a	a	b	h	h	b	b	h	a	h	h	b	b	h	h	a	h	b	b	a	b	h	b	h	a	b	a	b	h	h	h
Block15427	Chr.3	1562908	1576572	h	h	a	b	h	h	b	h	b	a	b	b	h	a	a	a	a	b	h	h	b	b	h	a	h	h	b	b	h	h	a	h	b	b	a	b	h	b	h	a	b	h	b	h	h	h
Block15431	Chr.3	1583919	1600124	h	h	a	b	h	h	b	h	b	a	b	b	h	a	a	a	a	b	h	h	b	b	h	a	h	h	b	b	h	h	a	h	b	b	a	b	h	b	h	a	b	h	b	h	h	h
Block15433	Chr.3	1600925	1606458	h	h	a	b	h	h	b	h	b	a	b	b	h	a	a	a	a	b	h	h	b	b	h	a	h	h	b	b	h	h	a	h	b	b	a	b	h	b	h	a	b	h	b	h	h	h
Block15436	Chr.3	1633101	1696126	h	h	a	b	h	h	b	h	b	a	b	b	h	a	a	a	a	b	h	h	b	b	h	a	h	h	b	b	h	h	a	h	b	b	a	b	h	b	h	a	b	h	b	h	h	h
Block15437	Chr.3	1717492	1733579	h	b	a	b	h	h	b	h	b	a	b	b	h	a	a	a	a	b	h	h	b	b	a	a	h	h	b	b	h	h	a	h	b	b	a	b	h	b	h	a	b	h	b	h	h	h
Block15439	Chr.3	1737163	1751665	h	b	a	b	h	h	b	h	b	a	b	b	h	a	a	a	a	b	h	h	b	b	a	a	h	h	b	b	h	h	a	h	b	b	a	b	h	b	h	a	b	h	b	h	h	h
Block15441	Chr.3	1784739	1794527	h	b	a	b	h	h	b	h	b	a	b	b	h	a	a	a	a	b	h	h	b	b	a	a	h	h	b	b	h	h	a	h	b	b	a	b	h	b	h	a	b	h	b	h	h	h
Block15443	Chr.3	1796563	1801627	h	b	a	b	h	h	b	h	b	a	b	b	h	a	a	a	a	b	h	h	b	b	a	a	h	h	b	b	h	h	a	h	b	b	a	b	h	b	h	a	b	h	b	h	h	h
Block15451	Chr.3	1814874	1820662	h	b	a	b	h	h	b	h	b	a	b	b	h	a	a	a	a	b	h	h	b	b	a	a	h	h	b	b	h	h	a	h	b	b	a	b	h	b	h	a	b	h	b	h	h	h
Block15454	Chr.3	1824039	1832448	h	b	a	b	h	h	b	h	b	a	b	b	h	a	a	a	a	b	h	h	b	b	a	a	h	h	b	b	h	h	a	h	b	b	a	b	h	b	h	a	b	h	b	a	h	h
Block15477	Chr.3	1861614	1869124	h	b	a	b	h	h	b	h	b	a	b	b	h	a	a	a	a	b	h	h	b	b	a	a	h	h	b	b	h	h	a	h	b	b	a	b	h	b	h	a	b	h	b	a	h	h
Block15478	Chr.3	1869299	1882816	h	b	a	b	h	h	b	h	b	a	b	b	h	a	a	a	a	b	h	h	b	b	a	a	h	h	b	b	h	h	a	h	b	b	a	b	h	b	h	a	b	h	b	h	h	h
Block15479	Chr.3	1884576	1891149	h	b	a	b	h	h	b	h	b	a	b	b	h	a	a	a	a	b	h	h	b	b	a	a	h	h	b	b	h	h	a	h	b	b	a	b	h	b	h	a	b	h	b	h	h	h
Block15480	Chr.3	1891375	1905838	h	b	a	b	h	h	b	h	b	a	b	b	h	a	a	a	a	b	h	h	b	b	a	a	h	h	b	b	h	h	a	h	b	b	a	b	h	b	h	a	b	h	b	h	h	h
Block15481	Chr.3	1905946	1915774	h	b	a	b	h	h	b	h	b	a	b	b	h	a	a	a	a	b	h	h	b	b	a	a	a	a	b	b	h	h	a	h	b	b	a	b	h	b	h	h	b	h	b	h	h	h
Block15500	Chr.3	1934745	1939908	h	b	a	b	h	h	b	h	b	a	b	b	h	a	a	a	a	b	h	h	b	b	a	a	h	h	b	b	h	h	a	h	b	b	a	b	h	b	h	h	b	h	b	h	h	h
Block15509	Chr.3	1948281	1962550	h	b	a	b	h	h	b	h	b	a	b	b	h	a	a	a	a	b	a	h	b	b	a	a	h	h	b	b	h	h	a	h	b	b	a	b	h	b	h	h	b	h	b	h	h	h
Block15514	Chr.3	1973939	1979161	h	b	a	b	h	h	b	h	b	a	b	b	h	a	a	a	a	b	h	h	b	b	a	a	h	h	b	b	h	h	a	h	b	b	a	b	h	b	h	h	b	h	b	a	h	h
Block15532	Chr.3	1994989	2002013	h	b	a	b	h	h	b	h	b	a	b	b	h	a	a	a	a	b	h	h	b	b	a	a	h	h	b	b	h	h	a	h	b	b	a	b	h	b	h	h	b	h	b	a	h	h
Block15535	Chr.3	2002866	2008498	h	b	a	b	h	h	b	h	b	a	b	b	h	a	a	a	a	b	h	h	b	b	a	a	h	h	b	b	h	h	a	h	b	b	a	b	h	b	h	h	b	h	b	a	h	h
Block15536	Chr.3	2009050	2014233	h	b	a	b	h	h	b	a	b	a	b	b	h	a	a	a	a	h	h	h	b	b	a	a	h	h	b	b	h	h	a	h	b	b	a	h	h	b	h	h	b	h	h	h	h	h
Block15607	Chr.3	2348304	2448056	h	b	a	h	h	h	b	a	b	a	b	b	h	a	a	a	a	h	h	h	b	b	h	a	h	h	b	b	h	h	a	h	b	b	a	h	h	b	h	h	b	h	h	h	h	h
Block15608	Chr.3	2448312	2479310	h	b	a	h	h	h	b	a	b	a	b	b	h	a	a	a	a	h	h	h	b	b	h	a	h	h	b	b	h	h	a	h	b	b	a	h	h	b	h	h	b	h	h	h	h	h
Block15609	Chr.3	2487109	2602831	h	b	a	h	h	h	b	a	b	a	b	b	h	h	a	a	a	h	h	h	b	b	h	a	h	h	b	b	h	h	a	h	b	b	a	h	h	b	h	h	h	h	h	h	h	h
Block15612	Chr.3	2611176	2735899	a	b	a	h	h	h	b	a	h	a	b	h	h	h	a	a	a	h	h	h	h	h	h	h	a	b	h	h	h	a	h	h	b	h	a	b	h	b	h	h	b	b	h	h	b	h
Block16544	Chr.3	5149170	5199065	h	h	h	b	h	h	h	a	b	a	b	b	h	h	a	h	h	h	b	h	h	b	h	h	a	b	h	h	b	a	h	h	b	a	h	b	h	b	h	b	h	b	h	b	b	h
Block17227	Chr.3	6680613	6686022	h	b	b	b	h	a	h	a	b	a	b	b	h	h	a	h	h	h	b	h	h	b	h	h	a	b	h	h	b	a	h	h	b	a	h	b	h	b	h	b	h	b	h	b	b	h
Block17229	Chr.3	6686274	6704855	h	b	b	b	h	a	h	a	b	a	b	b	h	h	a	h	h	h	b	h	h	b	h	h	a	b	h	h	b	a	h	h	b	a	h	b	h	b	h	b	h	b	h	b	b	h
Block17230	Chr.3	6704967	6710664	h	b	b	b	h	a	h	a	b	a	b	b	h	h	a	h	b	a	b	h	h	b	h	h	a	b	h	h	b	a	h	h	b	a	h	b	h	b	h	h	h	b	h	b	b	h
Block17473	Chr.3	7170820	7176709	h	b	b	b	h	a	h	a	b	a	b	b	h	h	a	h	b	a	b	h	h	b	h	h	a	b	h	h	b	a	h	h	b	a	h	b	h	b	h	h	h	b	h	b	b	h
Block17484	Chr.3	7195440	7202281	h	b	b	b	h	a	h	a	b	a	b	b	h	h	a	h	b	h	b	h	h	b	h	h	a	b	h	h	b	h	h	h	b	a	h	b	h	b	h	h	h	b	h	b	h	h
Block17551	Chr.3	7293171	7345255	h	b	b	b	h	a	h	a	b	a	b	b	h	h	a	h	b	h	b	h	h	b	h	h	a	b	h	h	b	h	h	h	b	a	h	b	h	b	h	h	h	b	h	b	h	h
Block17553	Chr.3	7399796	7410723	h	b	b	b	h	a	h	a	b	a	b	b	h	h	a	h	b	h	b	h	h	b	h	h	a	b	h	h	b	h	h	h	b	a	h	b	h	b	h	h	h	b	h	b	h	h
Block17555	Chr.3	7424320	7556059	h	b	b	b	h	a	h	a	b	a	b	b	h	h	a	h	b	h	b	h	h	b	h	h	a	b	h	h	b	h	h	h	b	a	h	b	h	b	h	h	h	b	h	b	h	h
Block17558	Chr.3	7581662	7600786	h	b	b	b	h	a	h	a	b	a	b	b	h	h	a	h	b	h	b	h	h	b	h	h	a	b	h	b	b	h	h	h	b	a	h	b	h	b	h	h	h	b	h	b	h	h
Block17569	Chr.3	7628569	7638102	h	b	b	b	h	a	h	a	b	a	b	b	h	h	a	h	b	h	b	h	h	b	h	h	a	b	h	h	b	h	h	h	b	a	h	b	h	b	h	h	h	b	h	b	h	h
Block17572	Chr.3	7639135	7644643	h	b	b	b	h	a	h	a	b	a	b	b	h	h	a	h	b	h	b	h	h	b	h	h	a	b	h	h	b	h	h	h	b	a	h	b	h	b	h	b	h	b	h	b	h	h
Block17723	Chr.3	7751508	7760508	h	b	b	b	h	a	h	a	b	a	b	b	h	h	a	h	b	h	b	h	h	b	h	h	a	b	h	h	b	h	h	h	b	a	h	b	h	b	h	h	h	b	h	b	h	h
Block18055	Chr.3	7902039	7910922	h	b	b	b	h	a	h	a	b	a	b	b	h	h	a	h	b	h	b	h	h	b	h	h	a	b	h	h	b	h	h	b	b	a	h	b	a	b	h	h	h	b	h	h	h	h
Block18280	Chr.3	8117571	8122835	h	b	b	b	h	a	h	a	b	a	b	b	h	h	a	h	b	h	b	h	h	b	h	h	a	b	a	h	b	h	h	b	b	a	h	b	a	b	h	h	h	b	h	h	h	h
Block18283	Chr.3	8125301	8141419	h	b	b	b	h	a	h	a	b	a	b	b	h	h	a	h	b	h	b	h	h	b	h	h	a	b	a	h	b	h	h	b	b	a	h	b	h	b	h	h	h	b	h	h	a	h
Block18290	Chr.3	8152156	8158285	h	b	b	b	h	a	h	a	b	a	b	b	h	h	a	h	b	h	b	h	h	b	h	h	a	b	h	h	b	h	a	b	b	a	h	b	h	b	h	a	h	b	h	h	h	h
Block18315	Chr.3	8177010	8182695	h	b	b	b	h	a	h	a	b	a	b	b	h	h	a	h	b	h	b	h	h	b	h	h	a	b	h	h	b	h	a	b	b	a	h	b	h	b	h	a	h	b	h	h	h	h
Block18316	Chr.3	8184505	8191074	h	b	b	b	h	a	h	a	b	a	b	b	h	h	a	h	b	h	b	h	h	b	h	h	a	b	h	h	b	h	a	b	b	a	h	b	h	b	h	a	h	b	h	h	h	h
Block18319	Chr.3	8192057	8198821	h	b	b	b	h	a	h	a	b	a	b	b	h	h	a	h	b	h	b	h	h	b	h	h	a	b	h	h	b	h	a	b	b	a	h	b	h	b	h	h	h	b	h	h	a	h
Block18341	Chr.3	8226909	8233556	h	b	b	b	h	a	h	a	b	a	b	b	h	h	a	h	b	h	b	h	h	b	h	h	a	b	h	a	b	h	a	b	b	a	h	b	h	b	h	h	h	b	h	h	h	h
Block18346	Chr.3	8245028	8250757	h	b	b	b	h	a	h	a	b	a	b	b	h	h	a	a	b	h	b	h	h	b	h	h	a	b	h	h	b	h	h	b	b	a	h	b	h	b	h	h	h	b	h	h	h	h
Block18367	Chr.3	8264089	8271263	h	b	b	b	h	a	a	a	b	a	b	b	h	h	a	h	b	h	b	h	h	b	h	h	a	b	h	h	b	h	h	b	b	a	h	b	h	b	a	h	h	b	h	h	h	h
Block18533	Chr.3	8350920	8357864	h	b	b	b	h	a	h	a	b	a	b	b	h	h	a	a	b	h	b	h	h	b	h	h	a	b	h	h	b	a	a	b	b	a	h	b	h	b	h	h	h	b	h	h	a	h
Block18565	Chr.3	8387907	8400909	h	b	b	b	h	a	h	a	b	a	b	b	h	h	a	h	b	h	b	h	h	b	h	h	a	b	h	h	b	a	h	b	b	a	h	b	h	b	h	h	h	b	h	h	h	h
Block18575	Chr.3	8406593	8416132	h	b	b	b	h	a	h	a	b	a	b	b	h	h	a	h	b	h	b	h	h	b	h	h	a	b	a	h	b	h	h	b	b	a	h	b	h	b	h	h	h	b	h	h	h	h
Block18586	Chr.3	8433975	8446616	h	b	b	b	h	a	h	a	b	a	b	b	h	h	a	h	b	h	b	h	h	b	h	h	a	b	a	h	b	h	h	b	b	a	h	b	h	b	h	h	h	b	h	h	h	h
Block18587	Chr.3	8448570	8458530	h	b	b	b	h	a	h	a	b	a	b	b	h	h	a	h	b	h	b	h	h	b	h	h	a	b	h	h	b	h	h	b	b	a	h	b	h	b	h	h	h	b	h	h	h	h
Block18588	Chr.3	8458656	8467329	h	b	b	b	h	a	h	a	b	a	b	b	h	h	a	h	b	h	b	h	h	b	h	h	a	b	h	h	b	h	h	b	b	a	h	b	h	b	h	h	h	b	h	h	h	h
Block18591	Chr.3	8470880	8479832	h	b	b	b	h	a	h	a	b	a	b	b	h	h	a	h	b	h	b	h	h	b	h	h	a	b	h	h	b	h	h	b	b	a	a	b	h	b	h	h	h	b	h	h	h	h
Block18595	Chr.3	8481969	8488427	h	b	b	b	h	a	h	a	b	a	b	b	h	h	a	a	b	h	b	h	h	b	h	a	a	b	a	h	b	h	h	b	b	a	h	b	h	b	h	h	h	b	h	h	h	h
Block18624	Chr.3	8507834	8515312	a	b	b	b	h	a	h	a	b	a	b	b	h	h	a	h	b	h	b	h	h	b	h	h	a	b	h	h	b	h	h	b	b	a	h	b	h	b	a	h	h	b	h	h	h	h
Block18674	Chr.3	8556016	8566407	h	b	b	b	h	a	h	a	b	a	b	b	h	h	a	h	b	h	b	h	h	b	a	h	a	b	h	h	b	h	h	b	b	a	h	b	h	b	h	h	h	b	h	h	h	h
Block18677	Chr.3	8573896	8581595	h	b	b	b	h	a	h	a	b	a	b	b	h	h	a	h	b	h	b	h	h	b	a	h	a	b	h	h	b	h	h	b	b	a	h	b	h	b	h	h	h	b	h	h	h	h
Block18678	Chr.3	8581743	8592397	h	b	b	b	h	a	h	a	b	a	b	b	h	h	a	h	b	h	b	h	h	b	a	h	a	b	h	h	b	h	h	b	b	a	h	b	h	b	h	h	h	b	h	h	h	h
Block18679	Chr.3	8592469	8601420	h	b	b	b	h	a	h	a	b	a	b	b	h	h	a	h	b	h	b	h	h	b	h	h	a	b	h	h	b	h	h	b	b	a	h	b	a	b	h	h	h	b	h	h	h	h
Block18681	Chr.3	8602055	8608472	h	b	b	b	h	a	h	a	b	a	b	b	h	h	a	h	b	h	b	h	h	b	h	h	a	b	h	h	b	h	h	b	b	a	h	b	a	b	h	h	h	b	h	h	h	h
Block18684	Chr.3	8609800	8617215	h	b	b	b	h	a	h	a	b	a	b	b	h	h	a	h	b	h	b	h	h	b	h	h	a	b	a	a	b	h	h	b	b	a	h	b	h	b	h	h	h	b	h	a	h	h
Block18700	Chr.3	8628787	8636139	a	b	b	b	h	a	h	a	b	a	b	b	h	h	a	h	b	h	b	h	h	b	h	h	a	b	h	h	b	h	h	b	b	a	h	b	h	b	h	h	h	b	a	h	h	h
Block18720	Chr.3	8650763	8661446	a	b	b	b	h	a	h	a	b	a	b	b	h	h	a	h	b	h	b	h	h	b	h	h	a	b	h	h	b	h	h	b	b	a	h	b	h	b	h	h	h	b	a	h	h	h
Block18726	Chr.3	8682887	8693494	h	b	b	b	h	a	h	a	b	a	b	b	h	h	a	h	b	h	b	h	h	b	h	h	a	b	h	h	b	h	h	b	b	a	h	b	h	b	a	h	h	b	h	h	h	h
Block18730	Chr.3	8695732	8703041	h	b	b	b	h	a	h	a	b	a	b	b	h	h	a	h	b	h	b	h	h	b	h	h	a	b	h	h	b	h	h	b	b	a	h	b	h	b	h	h	h	b	h	h	h	h
Block18732	Chr.3	8708165	8717992	h	b	b	b	h	a	h	a	b	a	b	b	h	h	a	h	b	h	b	h	h	b	h	h	a	b	h	h	b	h	h	b	b	a	h	b	h	b	h	h	h	b	h	h	h	h
Block18734	Chr.3	8720054	8738858	h	b	b	b	h	a	h	a	b	a	b	b	h	h	a	h	b	h	b	h	h	b	h	h	a	b	h	h	b	h	h	b	b	a	a	b	h	b	h	h	h	b	a	h	h	h
Block18740	Chr.3	8742786	8748437	h	b	b	b	h	a	h	a	b	a	b	b	h	h	a	h	b	h	b	h	h	b	h	h	a	b	h	h	b	h	h	b	b	a	a	b	h	b	h	h	h	b	a	h	h	h
Block18743	Chr.3	8750637	8757200	h	b	b	b	h	a	h	a	b	a	b	b	h	h	a	h	b	h	b	h	h	b	h	h	a	b	a	h	b	h	h	b	b	a	h	b	h	b	h	h	h	b	a	h	h	h
Block18746	Chr.3	8764957	8770578	h	b	b	b	h	a	h	a	b	a	b	b	h	h	a	h	b	h	b	h	h	b	h	h	a	b	a	h	b	h	h	b	b	a	h	b	h	b	h	h	h	b	a	h	h	h
Block18747	Chr.3	8772385	8778303	h	b	b	b	h	a	h	a	b	a	b	b	h	h	a	h	b	h	b	h	h	b	h	h	a	b	a	h	b	h	h	b	b	a	h	b	h	b	h	h	h	b	h	h	h	h
Block18750	Chr.3	8782357	8790652	h	b	b	b	h	a	h	a	b	a	b	b	h	h	a	h	b	h	b	h	h	b	h	h	a	b	h	h	b	h	h	b	b	a	h	b	h	b	h	h	h	b	h	h	h	h
Block18755	Chr.3	8797024	8803869	h	b	b	b	h	a	h	a	b	a	b	b	h	h	a	a	b	h	b	h	h	b	h	h	a	b	h	h	b	h	h	b	b	a	h	b	h	b	h	h	h	b	h	h	h	h
Block18772	Chr.3	8816187	8821672	h	b	b	b	h	a	h	a	b	a	b	b	h	h	a	a	b	h	b	h	h	b	h	h	a	b	h	h	b	h	h	b	b	a	h	b	a	b	h	h	h	b	h	h	h	h
Block18773	Chr.3	8821739	8828691	h	b	b	b	h	a	h	a	b	a	b	b	h	h	a	h	b	h	b	h	h	b	h	h	a	b	h	h	b	h	h	b	b	a	h	b	a	b	h	a	h	b	h	h	h	h
Block18779	Chr.3	8834367	8840815	h	b	b	b	h	a	h	a	b	a	b	b	h	h	a	h	b	h	b	h	h	b	h	h	a	b	h	h	b	h	h	b	b	a	h	b	h	b	h	a	h	b	h	h	h	h
Block18782	Chr.3	8906315	9015245	h	b	b	b	h	a	h	a	b	a	b	b	h	h	a	h	b	h	b	h	h	b	h	h	a	b	h	h	b	h	h	b	b	a	h	b	h	b	h	h	h	b	h	h	h	h
Block19024	Chr.3	9317447	9454673	h	b	h	b	h	a	b	a	b	a	b	b	h	h	a	h	b	h	b	h	h	b	h	h	a	b	h	h	b	h	h	b	b	a	h	b	h	b	h	h	h	b	h	h	h	h
Block19027	Chr.3	9461875	9468708	h	b	h	b	h	a	b	a	b	a	b	b	h	h	a	h	b	h	b	h	h	b	h	h	a	b	h	h	b	b	h	b	b	a	h	b	b	b	h	h	h	b	h	h	h	h
Block19052	Chr.3	9500229	9508805	h	b	h	b	h	a	b	a	b	a	b	b	h	h	a	h	b	h	b	h	h	b	h	h	a	b	h	h	b	b	h	b	b	a	h	b	b	b	h	h	h	b	h	h	h	h
Block19053	Chr.3	9509211	9517937	h	b	h	b	h	a	b	a	b	a	b	b	h	h	a	h	b	h	b	h	h	b	h	h	a	b	h	h	b	h	h	b	b	a	h	b	b	b	h	h	h	b	h	h	h	h
Block19054	Chr.3	9518071	9639441	h	b	h	b	h	a	b	a	b	a	b	b	h	h	a	h	b	h	b	h	h	b	h	h	a	b	h	h	b	h	h	b	b	a	h	b	b	b	h	h	h	b	h	h	h	h
Block19055	Chr.3	9651210	9656970	h	b	h	b	h	a	b	a	b	a	b	b	h	h	a	h	b	h	b	h	h	b	h	h	a	b	h	h	b	h	h	b	b	a	h	b	b	b	h	h	h	b	h	h	h	h
Block19057	Chr.3	9664263	9732622	h	b	h	b	h	a	b	a	b	a	b	b	h	h	a	h	b	h	b	h	h	b	h	h	a	b	h	h	b	h	h	b	b	a	h	b	h	b	h	h	h	b	h	h	h	h
Block19065	Chr.3	9747202	9753238	h	b	h	b	h	a	b	a	b	a	b	b	h	h	a	h	b	h	b	h	h	b	h	h	a	b	h	b	b	h	h	b	b	a	h	b	h	b	h	h	h	b	h	h	h	h
Block19068	Chr.3	9756584	9764326	h	b	h	b	h	a	b	a	b	a	b	b	h	h	a	h	b	h	b	h	h	b	b	h	a	b	h	b	b	h	h	b	b	a	h	b	h	b	h	h	h	b	h	h	h	h
Block19072	Chr.3	9766898	9782402	h	b	h	b	h	a	b	a	b	a	b	b	h	h	a	h	b	h	b	h	h	b	b	h	a	b	h	h	b	h	h	b	b	a	h	b	h	b	h	h	h	b	h	h	h	h
Block19073	Chr.3	9782634	9789791	h	b	h	b	h	a	b	a	b	a	b	b	h	h	a	h	b	h	b	h	h	b	h	h	a	b	h	h	b	b	h	b	b	a	h	b	h	b	b	h	h	b	h	h	h	h
Block19078	Chr.3	9796162	9814781	b	b	h	b	h	a	b	a	b	a	b	b	h	h	a	h	b	h	b	h	h	b	h	h	a	b	h	h	b	b	h	b	b	a	h	b	h	b	h	h	h	b	h	h	h	h
Block19080	Chr.3	9817005	9823197	b	b	h	b	h	a	b	a	b	a	b	b	h	h	a	h	b	h	b	h	h	b	h	h	a	b	h	h	b	h	h	b	b	a	h	b	h	b	h	b	h	b	h	h	h	h
Block19086	Chr.3	9832689	9842090	h	b	h	b	h	a	b	a	b	a	b	b	h	h	a	h	b	h	b	b	h	b	h	h	a	b	h	h	b	h	h	b	b	a	h	b	h	b	h	h	h	b	h	h	h	h
Block19088	Chr.3	9845972	9851196	h	b	h	b	h	a	b	a	b	a	b	b	h	h	a	h	b	h	b	b	h	b	h	h	a	b	h	h	b	h	h	b	b	a	h	b	h	b	h	h	h	b	h	h	h	h
Block19090	Chr.3	9852819	9858721	h	b	h	b	h	a	b	a	b	a	b	b	h	h	a	h	b	h	b	h	h	b	h	h	a	b	h	h	b	h	h	b	b	a	h	b	h	b	h	h	h	b	h	h	h	h
Block19092	Chr.3	9860260	9875036	h	b	h	b	h	a	b	a	b	a	b	b	h	h	a	h	b	h	b	h	h	b	h	h	a	b	h	h	b	h	h	b	b	a	h	b	h	b	h	h	h	b	h	h	h	h
Block19093	Chr.3	9875094	9884332	h	b	h	b	h	a	b	a	b	a	b	b	h	h	a	h	b	h	b	h	h	b	h	h	a	b	h	h	b	h	h	b	b	a	h	b	h	b	h	h	h	b	h	h	h	h
Block19094	Chr.3	9884761	9893513	h	b	h	b	h	a	b	a	b	a	b	b	h	h	a	h	b	h	b	h	h	b	b	h	a	b	h	h	b	b	h	b	b	a	h	b	h	b	h	h	h	b	h	h	h	h
Block19184	Chr.3	9942133	9947155	h	b	h	b	h	a	b	a	b	a	b	b	h	h	a	h	b	h	b	h	h	b	h	h	a	b	h	h	b	h	h	b	b	a	h	b	h	b	h	h	h	b	h	h	h	h
Block19233	Chr.3	10049248	10059388	h	b	h	b	h	a	b	a	b	a	b	b	h	h	a	h	b	h	b	h	h	b	h	h	a	b	h	h	b	h	h	b	b	a	h	b	h	b	h	h	h	b	h	h	h	h
Block19236	Chr.3	10069303	10075589	h	b	h	b	h	a	b	a	b	a	b	b	h	h	a	h	b	h	b	h	h	b	h	h	a	b	h	h	b	h	h	b	b	a	h	b	h	b	h	h	h	b	h	h	h	h
Block19237	Chr.3	10076933	10083238	h	b	h	b	h	a	b	a	b	a	b	b	h	h	a	h	b	h	b	h	h	b	h	h	a	b	h	h	b	h	h	b	b	a	h	b	h	b	h	h	h	b	b	h	h	h
Block19252	Chr.3	10105406	10112442	h	b	b	b	h	a	b	a	b	a	b	b	h	h	a	h	b	h	b	h	h	b	h	h	a	b	h	h	b	h	h	b	b	a	h	b	h	b	h	h	h	b	b	h	h	h
Block19253	Chr.3	10112448	10117496	h	b	h	b	h	a	b	a	b	a	b	b	h	h	a	h	b	h	b	h	h	b	h	h	a	b	h	h	b	h	h	b	b	a	b	b	h	b	h	h	h	b	b	h	h	h
Block19257	Chr.3	10119859	10125498	h	b	h	b	h	a	b	a	b	a	b	b	h	h	a	h	b	h	b	h	h	b	h	h	a	b	h	h	b	h	h	b	b	a	b	b	h	b	h	b	h	b	h	h	h	h
Block19259	Chr.3	10127843	10146615	h	b	h	b	h	a	b	a	b	a	b	b	h	h	a	h	b	b	b	h	h	b	h	h	a	b	h	h	b	h	h	b	b	a	h	b	h	b	h	h	h	b	h	h	h	h
Block19357	Chr.3	10209945	10216097	h	b	h	b	h	a	b	a	b	a	b	b	h	h	a	h	b	h	b	h	h	b	h	h	a	b	h	h	b	h	h	b	b	a	b	b	h	b	h	h	h	b	h	h	h	h
Block19363	Chr.3	10222105	10232299	h	b	h	b	h	a	b	a	b	a	b	b	h	h	a	h	b	h	b	h	h	b	h	h	a	b	h	h	b	h	h	b	b	a	h	b	h	b	h	b	h	b	h	h	h	h
Block19486	Chr.3	10294308	10302459	h	b	h	b	h	a	b	a	b	a	b	b	h	h	a	h	b	h	b	h	h	b	h	h	a	b	h	h	b	h	h	b	b	a	h	b	h	b	h	b	h	b	h	h	b	h
Block19540	Chr.3	10333460	10342356	h	b	h	b	h	a	b	a	b	a	b	b	h	h	a	b	b	h	b	h	b	b	h	h	a	b	h	h	b	h	h	b	b	a	h	b	h	b	h	h	h	b	h	h	h	h
Block19724	Chr.3	10494503	10501817	h	b	h	b	h	a	b	a	b	a	b	b	h	h	a	b	b	h	b	h	h	b	h	h	a	b	h	h	b	h	h	b	b	a	h	b	h	b	b	h	h	b	h	h	h	h
Block19728	Chr.3	10507058	10517678	h	b	h	b	h	a	b	a	b	a	b	b	h	h	a	b	b	h	b	h	h	b	h	h	a	b	h	h	b	h	h	b	b	a	h	b	h	b	b	h	h	b	h	h	h	h
Block19729	Chr.3	10517860	10530780	h	b	h	b	h	a	b	a	b	a	b	b	h	h	a	h	b	h	b	h	h	b	h	h	a	b	h	h	b	h	h	b	b	a	b	b	h	b	h	h	h	b	h	h	h	h
Block19735	Chr.3	10544129	10552499	h	b	h	b	h	a	b	a	b	a	b	b	h	h	a	h	b	h	b	h	h	b	h	h	a	b	h	h	b	h	h	b	b	a	h	b	h	b	h	h	h	b	h	h	h	h
Block19737	Chr.3	10555257	10574019	h	b	h	b	h	a	b	a	b	a	b	b	h	h	a	h	b	h	b	h	h	b	h	h	a	b	h	h	b	h	h	b	b	a	h	b	h	b	h	h	h	b	h	h	h	h
Block19743	Chr.3	10579977	10591545	h	b	h	b	h	a	b	a	b	a	b	b	h	h	a	h	b	h	b	h	h	b	h	h	a	b	h	h	b	h	h	b	b	a	h	b	h	b	h	h	h	b	h	h	h	h
Block19748	Chr.3	10645441	10655806	h	b	h	b	h	a	b	a	h	h	h	h	h	h	h	h	b	a	b	h	h	b	h	h	a	b	h	h	b	h	b	h	b	h	b	b	h	b	h	h	h	b	h	h	h	b
Block19817	Chr.3	13152346	13158403	h	h	h	h	h	a	b	a	h	h	h	h	h	h	h	h	b	a	b	h	h	b	h	h	a	b	h	h	b	h	b	b	b	h	b	b	h	b	h	h	h	b	h	h	h	b
Block19819	Chr.3	13178047	13184225	h	h	h	h	h	a	b	a	h	h	h	h	h	h	h	h	b	a	b	h	h	b	h	h	a	b	h	h	b	h	b	b	b	h	b	b	h	b	h	h	h	b	h	h	h	b
Block19833	Chr.3	13480014	13523394	h	h	h	h	h	a	b	a	h	h	h	h	h	h	h	h	b	a	b	h	h	b	a	h	a	b	h	a	b	h	b	b	b	h	b	b	b	b	h	h	h	b	h	h	b	b
Block20708	Chr.3	14833941	14852458	h	h	h	h	h	a	b	a	h	h	h	h	h	h	h	h	b	a	b	h	h	b	a	h	a	b	h	a	b	h	b	b	b	h	b	b	b	b	h	h	h	b	h	h	b	b
Block20711	Chr.3	14857317	14875715	h	h	h	h	h	a	b	h	h	b	h	h	h	h	h	h	b	a	b	h	h	h	a	h	a	b	h	a	b	h	b	b	b	h	b	h	h	h	h	h	h	b	h	h	h	b
Block21577	Chr.3	17400934	17407686	h	h	h	h	h	a	h	h	a	b	h	h	h	h	b	h	b	a	b	h	a	b	a	h	a	b	a	a	b	b	b	b	b	a	b	b	b	h	h	b	h	b	h	h	b	b
Block22158	Chr.3	18777992	18783113	h	a	h	h	h	a	b	h	h	h	h	h	h	h	h	h	b	a	b	h	h	b	a	a	a	b	a	a	b	h	b	b	b	h	b	b	b	h	h	b	h	h	h	h	b	b
Block22351	Chr.3	18985529	18994526	h	h	h	h	h	a	b	h	h	b	h	h	h	h	h	h	h	a	h	h	h	b	a	h	a	h	b	a	h	b	b	b	b	h	b	b	b	h	h	b	h	b	h	h	b	b
Block22850	Chr.3	20066052	20075788	h	h	h	h	h	a	b	h	h	b	b	b	h	h	b	h	a	a	b	h	b	b	h	b	b	b	b	a	b	b	h	h	b	h	b	h	b	b	h	h	b	h	b	h	b	h
Block24014	Chr.3	39176244	39378311	h	h	h	h	b	h	b	h	h	b	b	b	h	h	b	h	a	a	b	h	b	b	h	b	b	b	b	a	b	b	h	h	b	h	b	h	b	b	h	h	b	h	b	h	b	h
Block24015	Chr.3	39378796	39530729	h	h	h	h	b	h	b	h	h	b	b	b	h	h	b	h	a	a	b	h	b	b	h	b	b	b	b	a	b	b	h	h	b	h	b	h	b	b	h	h	b	h	b	h	b	h
Block24016	Chr.3	39543404	39557143	h	h	h	h	b	h	b	h	h	b	b	b	h	h	b	h	a	a	b	h	b	b	h	b	b	b	b	a	b	b	h	h	b	h	b	h	b	b	h	h	b	h	b	h	b	h
Block24020	Chr.3	39565937	39572880	h	h	h	h	b	h	b	h	h	b	b	b	h	h	b	h	a	a	b	h	b	b	h	b	b	b	b	a	b	b	h	h	b	h	b	h	b	b	h	h	b	h	b	h	b	h
Block24022	Chr.3	39576063	39589910	h	h	h	a	b	h	b	h	h	b	b	b	h	h	b	h	a	a	b	h	b	b	h	b	b	b	b	a	b	b	h	h	b	h	b	h	b	b	h	h	b	h	b	h	b	h
Block24025	Chr.3	39591709	39598819	h	h	h	a	b	h	b	h	h	b	b	b	h	h	b	a	a	a	b	a	b	b	h	b	b	b	b	a	b	b	h	h	b	h	b	h	b	b	a	a	b	a	b	h	b	a
Block24107	Chr.3	39634292	39651103	h	h	h	h	b	h	b	h	h	b	b	b	h	h	b	h	a	a	b	h	b	b	h	b	b	b	b	a	b	b	h	a	b	h	b	h	b	b	h	h	b	h	b	h	b	h
Block24140	Chr.3	39661113	39666381	h	h	h	h	b	h	b	h	h	b	b	b	h	h	b	h	a	a	b	h	b	b	h	b	b	b	b	a	b	b	h	h	b	h	b	h	b	b	h	h	b	h	b	h	b	h
Block24261	Chr.3	39723783	39729287	h	h	h	h	b	h	b	h	h	b	b	b	h	a	b	h	a	a	b	h	b	b	h	b	b	b	b	a	b	b	h	h	b	h	b	h	b	b	h	a	b	h	b	h	b	h
Block24279	Chr.3	39743063	39748467	a	h	h	h	b	h	b	h	h	b	b	b	h	h	b	h	a	a	b	h	b	b	h	b	b	b	b	a	b	b	h	h	b	h	b	h	b	b	h	h	b	h	b	h	b	h
Block25055	Chr.3	40318275	40336177	h	h	h	h	b	h	b	h	h	b	b	b	h	h	b	h	a	a	b	h	b	b	h	b	b	b	b	a	b	b	h	h	b	h	b	h	b	b	h	h	b	h	b	h	b	h
Block25059	Chr.3	40338590	40347133	h	h	h	h	b	h	b	h	h	b	b	b	a	h	b	h	a	a	b	h	b	b	h	b	b	b	b	a	b	b	h	h	b	h	b	h	b	b	h	h	b	h	b	a	b	h
Block25096	Chr.3	40398184	40409615	h	h	h	h	b	h	b	h	h	b	b	b	h	h	b	h	a	a	b	h	b	b	h	b	b	b	b	a	b	b	h	h	b	h	b	h	b	b	h	h	b	h	b	h	b	h
Block25105	Chr.3	40419854	40439302	h	h	h	h	b	h	b	h	h	b	b	b	h	h	b	h	a	a	b	h	b	b	h	b	b	b	b	a	b	b	h	h	b	h	b	h	b	b	h	h	b	h	b	h	b	h
Block25106	Chr.3	40439439	40448795	h	h	h	h	b	h	b	h	h	b	b	b	h	h	b	h	a	a	b	h	b	b	h	b	b	b	b	a	b	b	h	h	b	h	b	h	b	b	h	h	b	h	b	h	b	h
Block25107	Chr.3	40449847	40524327	h	h	h	h	b	h	b	h	h	b	b	b	h	h	b	h	a	a	b	h	b	b	a	b	b	b	b	a	b	b	h	h	b	a	b	h	b	b	h	h	b	h	b	a	b	h
Block25177	Chr.3	40755628	40761861	a	h	h	h	b	h	b	h	h	b	b	b	h	h	b	h	a	a	b	h	b	b	a	b	b	b	b	a	b	b	h	h	b	a	b	h	b	b	h	h	b	h	b	a	b	h
Block25178	Chr.3	40763261	40779046	a	h	h	h	b	h	b	h	h	b	b	b	h	h	b	h	a	a	b	h	b	b	h	b	b	b	b	a	b	b	h	h	b	a	b	h	b	b	h	h	b	h	b	a	b	h
Block25186	Chr.3	40779624	40788199	a	a	h	h	b	h	b	h	h	b	b	b	h	h	b	h	a	a	b	h	b	b	h	b	b	b	b	a	b	b	a	h	b	a	b	h	b	b	h	h	b	h	b	a	b	h
Block25192	Chr.3	40788703	40807758	h	a	h	a	b	a	b	h	h	b	b	b	h	h	b	h	a	a	b	h	b	b	h	b	b	b	b	a	b	b	a	h	b	a	b	h	b	b	h	h	b	h	b	h	b	h
Block25199	Chr.3	40810340	40821550	h	a	h	a	b	a	b	h	h	b	b	b	h	h	b	h	a	a	b	h	b	b	h	b	b	b	b	a	b	b	h	h	b	h	b	h	b	b	h	h	b	h	b	h	b	h
Block25213	Chr.3	40837862	40880633	h	h	h	h	b	h	b	h	h	b	b	b	h	h	b	h	a	a	b	h	b	b	h	b	b	b	b	a	b	b	h	h	b	h	b	h	b	b	h	h	b	h	b	h	b	h
Block25214	Chr.3	40880647	40888141	h	h	h	h	b	h	b	h	h	b	b	b	h	h	b	h	a	a	b	h	b	b	h	b	b	b	b	a	b	b	h	h	b	h	b	h	b	b	h	h	b	h	b	h	b	h
Block25215	Chr.3	40888883	40897836	h	h	h	h	b	h	b	h	h	b	h	h	h	h	b	b	a	h	b	a	b	b	a	h	h	h	h	h	h	b	h	h	h	h	b	h	b	b	h	h	b	h	h	b	b	h
Block26762	Chr.3	45260054	45267568	h	h	h	b	b	h	b	b	h	b	h	h	h	h	b	b	a	h	b	h	b	b	a	h	h	h	h	h	h	b	h	h	h	h	b	b	b	b	h	h	b	h	h	b	b	h
Block27208	Chr.3	45594206	45695721	h	h	h	b	b	h	b	h	h	b	h	h	h	h	b	b	a	h	b	h	h	b	a	h	h	h	h	h	h	h	h	h	h	h	h	b	b	b	h	b	h	h	h	b	h	h
Block28010	Chr.3	46773497	46779579	h	h	a	b	b	h	h	b	h	b	h	h	h	h	b	b	a	h	b	h	b	b	a	h	h	h	h	h	h	h	h	h	h	h	h	b	b	b	h	b	b	h	h	b	h	h
Block28278	Chr.3	47018911	47024803	h	h	a	b	b	h	b	b	h	b	h	h	h	h	b	b	a	h	b	h	b	b	a	b	a	h	h	b	h	h	h	h	h	h	h	b	h	b	a	b	b	h	h	b	h	h
Block29112	Chr.3	47689110	47697063	h	h	a	h	b	h	b	b	h	b	h	h	h	h	b	b	a	h	b	h	b	b	a	b	a	b	h	b	h	h	h	h	h	b	h	b	h	b	a	b	b	h	h	b	h	h
Block29138	Chr.3	47729105	47734136	h	h	a	h	b	h	b	b	h	b	h	h	h	h	b	b	a	h	b	h	b	h	a	b	a	h	h	b	h	h	h	h	h	h	h	b	h	b	a	b	b	h	h	b	h	h
Block29196	Chr.3	47794626	47802452	h	h	a	h	b	h	b	b	h	b	h	h	h	h	b	b	a	h	b	h	b	h	a	b	a	h	h	b	h	h	h	h	h	h	h	b	h	b	a	b	b	h	h	b	h	h
Block29197	Chr.3	47802840	47826231	h	h	a	h	b	h	b	b	h	b	h	h	h	b	b	b	a	h	b	h	b	h	a	b	a	h	h	b	h	h	b	h	b	h	h	b	h	b	a	b	b	h	h	b	h	h
Block29226	Chr.3	47840187	47845682	h	h	a	h	b	h	b	b	h	b	h	h	h	h	b	b	a	h	b	h	b	h	a	b	a	h	h	b	h	h	h	h	h	b	h	b	h	b	a	b	b	h	h	b	h	h
Block29236	Chr.3	47854199	47860493	h	h	a	h	b	h	b	b	h	b	h	h	h	h	b	b	a	h	b	h	b	h	a	b	a	h	h	b	h	h	h	h	h	h	h	b	h	b	a	b	b	h	h	b	h	h
Block29241	Chr.3	47864423	47869847	h	h	a	h	b	h	b	b	h	b	h	h	h	h	b	b	a	h	b	h	b	h	a	b	a	h	h	b	h	h	h	h	h	h	h	b	h	b	a	b	b	h	h	b	h	h
Block29242	Chr.3	47869873	47877802	h	h	a	h	b	h	b	b	h	b	h	h	h	h	b	b	a	h	b	h	b	h	a	b	a	h	h	b	h	h	h	h	h	h	h	b	h	b	a	b	b	h	h	b	h	h
Block29245	Chr.3	47880333	47887047	h	h	a	h	b	h	b	b	h	b	h	h	h	h	b	b	a	h	b	h	b	h	a	h	a	h	h	b	h	h	h	h	h	h	h	b	h	b	a	b	b	h	h	b	h	h
Block29248	Chr.3	47887494	47900835	h	h	a	h	b	h	b	b	h	b	a	h	h	h	b	b	a	h	b	h	b	h	a	h	a	h	a	b	h	h	h	h	h	h	h	b	h	b	a	b	b	h	h	b	h	h
Block29251	Chr.3	47915708	47951521	h	h	a	h	b	h	b	b	h	b	a	h	h	h	b	b	a	h	b	h	b	h	a	h	a	h	a	b	h	h	h	h	h	h	h	b	h	b	a	b	b	h	h	b	h	h
Block29254	Chr.3	47962319	47988433	h	h	a	h	b	h	b	b	h	b	a	h	h	h	b	b	a	h	b	h	b	h	a	h	a	h	a	b	h	h	h	h	h	h	h	b	h	b	a	b	b	h	h	b	h	h
Block29255	Chr.3	48008047	48041640	h	h	a	h	b	h	b	b	h	b	a	h	h	h	b	b	a	h	b	h	b	h	a	h	a	h	a	b	h	h	h	h	h	h	h	b	h	b	a	b	b	h	h	b	h	h
Block29257	Chr.3	48052804	48057857	a	h	a	h	b	h	b	b	h	b	h	h	h	h	b	b	a	h	b	h	b	h	a	h	a	h	h	b	h	h	h	h	h	h	h	b	h	b	a	b	b	h	h	b	h	h
Block29338	Chr.3	48172051	48190441	h	h	a	h	b	h	b	b	h	b	h	h	h	h	b	b	a	h	b	h	b	h	a	h	a	h	h	b	h	h	h	h	h	h	h	b	h	b	a	b	b	h	h	b	h	h
Block29340	Chr.3	48190723	48227974	h	h	a	h	b	h	b	b	h	b	h	h	h	h	b	h	a	a	b	h	b	h	a	h	a	h	h	b	h	h	h	h	h	h	h	b	h	b	a	b	b	h	h	b	h	h
Block29349	Chr.3	48283610	48304323	h	h	a	h	b	h	b	b	h	b	h	h	h	h	b	h	a	a	b	h	b	h	a	h	a	h	h	b	h	h	h	h	h	h	h	b	h	b	a	b	b	h	h	b	h	h
Block29352	Chr.3	48319014	48333128	h	h	a	h	b	h	b	b	h	b	h	h	h	h	b	h	a	a	b	h	b	h	a	h	a	h	h	b	h	h	h	h	h	h	h	b	h	b	a	b	b	h	h	b	h	h
Block29365	Chr.3	48347618	48414220	h	h	a	h	b	h	b	b	h	b	h	h	h	h	b	h	a	a	b	h	b	h	a	h	a	h	h	b	h	h	h	h	h	h	h	b	h	b	a	b	b	h	h	b	h	h
Block29380	Chr.3	48424398	48433210	b	h	a	h	b	h	b	b	h	b	h	h	h	h	b	h	a	a	b	h	b	h	a	h	a	a	h	b	a	h	h	h	h	h	a	b	h	b	a	b	b	h	h	b	h	h
Block29489	Chr.3	48481134	48487830	b	h	a	h	b	h	b	b	h	b	h	h	h	h	b	h	a	a	b	a	b	h	a	h	a	a	h	b	h	h	h	h	h	h	h	b	h	b	a	b	b	a	h	b	h	h
Block29508	Chr.3	48497015	48565318	b	a	a	h	b	h	b	b	h	b	h	h	h	h	b	h	a	a	b	a	b	h	a	h	a	a	h	b	h	h	h	h	h	h	h	b	h	b	a	b	b	a	h	b	h	h
Block29509	Chr.3	48566760	48583950	b	a	a	h	b	h	b	b	h	b	h	h	h	h	b	h	a	a	b	a	b	h	a	a	a	a	h	b	h	h	h	h	h	h	h	b	h	b	a	b	b	a	h	b	h	h
Block29511	Chr.3	48615937	48621239	b	a	a	h	b	h	b	b	h	b	h	h	h	h	b	h	a	a	b	a	b	h	a	a	a	a	h	b	h	a	h	h	h	h	h	b	a	b	a	b	b	a	h	b	h	h
Block29514	Chr.3	48642825	48661292	b	a	a	h	b	h	b	b	a	b	h	h	h	h	b	a	a	a	b	h	b	h	a	h	a	b	h	b	h	h	h	h	h	a	a	h	h	b	a	b	b	b	h	b	h	h
Block29723	Chr.3	49081323	49091187	b	h	a	h	b	a	b	b	h	b	h	h	h	h	b	h	a	a	b	h	b	h	a	h	a	b	a	b	h	h	h	h	h	h	a	a	a	b	a	b	b	b	h	b	h	h
Block29740	Chr.3	49103584	49126107	b	a	a	h	b	a	b	b	h	b	h	h	h	h	b	h	a	a	b	h	b	h	a	a	a	b	h	b	h	h	b	h	h	h	a	a	a	b	a	b	b	b	h	b	h	h
Block29752	Chr.3	49133750	49147323	b	a	a	h	b	h	b	b	h	b	h	h	h	h	b	h	a	a	b	h	b	h	a	a	a	b	h	b	h	h	b	h	h	h	a	a	a	b	a	b	b	b	h	b	h	h
Block29753	Chr.3	49149564	49161061	b	a	a	h	b	h	b	b	h	b	h	h	h	h	b	h	a	a	b	h	b	h	a	h	a	b	h	b	h	h	b	h	h	h	h	h	a	b	a	b	b	b	h	h	h	h
Block30395	Chr.3	49829841	49836749	b	h	a	h	h	h	b	b	h	h	h	b	h	a	h	h	h	h	h	a	h	b	b	a	b	a	h	a	h	h	b	b	a	a	a	h	h	a	h	h	h	h	a	b	b	h
Block30616	Chr.4	4743	196753	h	a	a	h	h	b	a	b	h	h	h	h	h	a	h	h	h	h	h	a	h	b	b	a	b	a	h	a	h	h	b	b	a	a	a	h	h	a	h	h	h	h	a	b	b	h
Block30617	Chr.4	208146	375444	h	a	a	h	h	b	a	b	h	h	h	h	h	h	h	a	h	h	a	a	h	b	b	a	b	a	a	a	h	h	b	b	a	a	a	a	h	a	a	h	h	h	a	b	b	a
Block30697	Chr.4	408181	422560	h	a	a	a	a	b	a	b	h	h	h	h	h	h	h	a	h	h	h	a	h	h	b	a	b	a	a	a	h	h	b	b	a	a	a	h	h	a	h	h	h	h	a	b	b	a
Block30711	Chr.4	597132	666605	h	a	a	a	a	b	a	b	h	h	h	h	h	h	b	h	h	h	h	a	h	h	b	a	b	a	h	a	h	h	b	b	a	a	a	h	h	h	h	h	h	h	a	b	b	h
Block30731	Chr.4	676571	682451	b	a	a	a	a	b	h	b	h	h	h	h	h	h	b	h	h	h	h	a	h	h	b	a	b	a	h	a	h	h	b	b	a	a	a	a	h	h	h	h	h	h	a	b	b	h
Block30743	Chr.4	699422	710287	b	a	a	a	a	b	h	b	h	h	h	h	h	h	b	h	h	h	h	a	h	h	b	a	b	a	h	a	h	h	b	b	a	a	a	a	h	h	h	h	h	h	a	b	b	h
Block30745	Chr.4	710489	734893	b	a	a	a	a	b	h	b	h	h	h	h	h	h	b	h	h	h	h	a	h	h	h	a	b	a	h	a	h	h	b	b	a	a	a	a	h	h	h	h	h	h	a	b	b	h
Block30798	Chr.4	793121	804521	b	a	a	a	a	b	h	b	h	h	h	h	h	h	b	h	h	h	h	a	h	h	h	a	b	a	h	a	h	h	b	b	a	a	a	a	h	h	h	h	h	h	a	b	b	h
Block30799	Chr.4	804575	814893	b	a	a	a	a	b	h	b	h	h	h	h	h	h	b	h	h	h	h	a	h	h	h	a	b	a	h	a	h	h	b	b	a	a	a	a	h	h	h	h	h	h	a	b	b	h
Block30916	Chr.4	893358	906787	b	a	a	a	a	b	h	b	h	h	h	h	h	h	b	h	h	h	h	a	h	h	a	a	b	a	h	a	h	h	b	b	a	a	a	a	h	h	h	h	h	h	a	b	b	h
Block30918	Chr.4	908394	1004975	b	a	a	a	a	b	h	b	h	h	h	h	h	h	b	h	h	h	h	a	h	h	h	a	b	a	h	a	h	h	b	b	a	a	a	a	h	h	h	h	h	h	a	b	b	h
Block30937	Chr.4	1045439	1058098	b	a	a	a	a	b	h	b	h	h	h	h	h	h	b	h	h	h	h	a	h	h	h	a	b	a	h	a	h	h	b	b	a	a	a	a	h	h	h	h	h	h	a	b	b	h
Block30939	Chr.4	1060040	1069993	b	a	a	a	a	b	h	b	h	h	h	h	h	h	b	h	h	h	h	a	h	h	h	a	b	a	h	a	h	h	b	b	a	a	a	a	h	h	h	h	h	h	a	b	b	h
Block30940	Chr.4	1070020	1081456	b	a	a	a	a	b	h	b	h	h	h	h	h	h	b	h	h	h	h	a	h	h	h	a	b	a	h	a	h	h	b	b	a	a	a	a	h	h	h	h	h	h	a	b	b	h
Block30941	Chr.4	1081484	1088958	b	a	a	a	a	b	h	b	h	h	h	h	h	h	b	h	h	h	h	a	h	h	h	a	b	a	h	a	h	h	b	b	a	a	a	a	h	h	h	h	h	h	a	b	b	h
Block30942	Chr.4	1089024	1100636	b	a	a	a	a	b	h	b	h	h	h	h	h	h	b	h	h	h	h	a	h	h	h	a	b	a	h	a	h	h	b	b	a	a	a	a	h	h	h	h	h	h	a	b	b	b
Block31009	Chr.4	1120300	1126756	b	a	a	a	a	b	h	b	h	h	h	h	h	h	b	h	h	h	h	a	h	h	h	a	b	a	h	a	h	h	b	b	a	a	a	a	h	h	h	h	h	h	a	b	b	h
Block31018	Chr.4	1139415	1145003	b	a	a	a	a	b	h	b	h	h	h	h	h	h	b	h	h	h	h	a	h	h	h	a	b	a	h	a	h	h	b	b	a	a	a	a	h	h	h	h	h	h	a	b	b	h
Block31027	Chr.4	1155830	1175643	b	a	a	a	a	b	h	b	h	h	h	h	h	h	b	h	h	h	h	a	h	h	h	a	b	a	h	a	h	h	b	b	a	a	a	a	h	h	h	h	h	h	a	b	b	h
Block31029	Chr.4	1176252	1188313	b	a	a	a	a	b	h	b	h	h	h	h	h	h	b	h	h	h	h	a	h	h	h	a	b	a	h	a	h	h	b	b	a	a	a	a	h	h	h	h	h	h	a	b	b	h
Block31032	Chr.4	1197145	1212168	b	a	a	a	a	b	h	b	h	h	h	h	h	h	b	h	h	h	h	a	h	h	h	a	b	a	h	a	h	h	b	b	a	a	a	a	h	h	h	h	h	h	a	b	b	b
Block31033	Chr.4	1212718	1221771	b	a	a	a	a	b	h	b	h	h	h	h	h	h	b	h	h	h	h	a	h	h	h	a	b	a	h	a	h	h	b	b	a	a	a	a	h	h	h	h	h	h	a	b	b	b
Block31035	Chr.4	1221793	1227617	b	a	a	a	a	b	h	b	h	h	h	h	h	h	b	h	h	h	h	a	h	h	h	a	b	a	h	a	h	h	b	b	a	a	a	a	h	h	h	h	h	h	a	b	b	h
Block31038	Chr.4	1230987	1236252	b	a	a	a	a	b	h	b	h	h	h	h	h	h	b	b	h	h	h	a	h	h	h	a	b	a	h	a	h	h	b	b	a	a	a	a	h	h	h	h	h	h	a	b	b	h
Block31049	Chr.4	1239800	1248380	b	a	a	a	a	b	h	b	h	h	h	h	h	h	b	h	h	h	h	a	h	h	b	a	b	a	h	a	h	b	b	b	a	a	a	a	h	h	h	h	h	h	a	b	b	b
Block31105	Chr.4	1309133	1317616	b	a	a	a	a	b	h	b	h	h	h	h	h	h	b	h	h	h	h	a	h	h	h	a	b	a	h	a	h	h	b	b	a	a	a	a	h	h	h	h	h	h	a	b	b	h
Block31216	Chr.4	1396642	1406184	b	a	a	a	a	b	h	b	a	h	h	h	h	h	b	h	h	h	h	a	h	h	h	a	b	a	h	a	h	h	b	b	a	a	a	a	h	h	h	h	h	h	a	b	b	h
Block31220	Chr.4	1406796	1416861	b	a	a	a	a	b	h	b	h	h	h	h	h	h	b	h	h	h	h	a	h	h	h	a	b	a	h	a	h	h	b	b	a	a	a	a	h	h	h	h	h	h	a	b	b	h
Block31223	Chr.4	1424951	1433259	b	a	a	a	a	b	h	b	h	h	h	h	h	h	b	h	h	a	h	a	h	h	h	a	b	a	h	a	h	h	b	b	a	a	a	a	h	h	h	h	h	h	a	b	b	h
Block31231	Chr.4	1441283	1446656	b	a	a	a	a	b	h	b	h	h	h	h	h	h	b	h	h	h	h	a	h	h	h	a	b	a	h	a	h	h	b	b	a	a	a	a	h	h	h	h	h	h	a	b	b	h
Block31235	Chr.4	1449556	1458302	b	a	a	a	a	b	h	b	h	h	h	h	h	h	b	h	h	a	h	a	h	h	h	a	b	a	h	a	h	a	b	b	a	a	a	a	h	h	h	h	h	h	a	b	b	a
Block31246	Chr.4	1462808	1474120	b	a	a	a	a	b	h	b	h	h	h	h	h	h	b	a	h	a	h	a	h	h	h	a	b	a	h	a	h	h	b	h	a	a	a	a	a	h	h	h	h	h	a	h	b	a
Block31267	Chr.4	1627247	1638648	b	a	a	a	a	h	h	h	h	h	h	h	h	h	b	a	h	a	h	h	h	h	h	a	b	a	h	a	h	h	b	h	a	a	a	a	a	h	h	h	h	h	h	h	b	h
Block31271	Chr.4	1654664	1672652	b	a	a	a	a	h	h	h	h	h	h	h	h	h	b	a	h	a	h	h	h	b	h	a	b	a	h	a	h	h	b	h	a	a	a	a	a	h	h	h	h	h	h	h	b	h
Block31274	Chr.4	1725947	1807701	b	a	a	a	a	h	h	h	h	h	h	h	h	h	h	a	h	a	h	h	a	b	h	a	b	a	h	a	b	h	h	h	a	a	a	a	a	h	h	h	h	h	h	h	b	h
Block31288	Chr.4	2063686	2139616	b	a	h	a	a	h	h	h	h	h	h	h	h	h	h	a	h	a	h	b	a	b	h	a	b	a	h	h	b	h	h	h	a	a	h	h	a	h	h	b	h	h	h	h	b	h
Block31387	Chr.4	2226744	2288998	b	a	h	a	a	h	h	h	h	h	h	h	h	h	h	a	h	a	b	b	a	b	h	a	b	a	h	h	b	h	h	h	a	a	h	h	a	h	h	b	h	h	h	h	b	h
Block31391	Chr.4	2310631	2322287	b	a	h	a	a	h	h	h	h	h	h	h	h	h	h	a	h	a	b	b	a	b	h	a	b	a	h	h	b	h	h	h	a	a	h	h	a	h	h	b	h	h	h	h	b	h
Block31392	Chr.4	2327275	2388732	b	a	h	a	a	h	h	h	h	h	h	h	h	h	h	a	h	a	b	b	a	b	h	a	b	a	h	h	b	h	h	h	a	a	h	h	a	h	h	b	h	h	h	h	b	h
Block31393	Chr.4	2394132	2405197	b	a	h	a	a	h	h	h	h	h	h	h	h	h	a	a	h	a	b	b	a	b	h	a	b	a	h	h	b	h	h	h	a	a	h	h	a	h	h	b	h	h	h	h	b	h
Block31425	Chr.4	2430580	2436580	b	a	h	a	a	h	h	h	h	h	h	a	h	h	a	a	h	a	b	b	a	b	h	a	b	a	h	h	b	h	h	h	a	a	h	h	a	h	h	b	h	h	h	h	b	h
Block31468	Chr.4	2466699	2474970	b	a	h	a	a	h	h	h	h	h	h	h	h	h	h	a	h	a	b	b	a	b	h	a	b	a	h	h	b	h	h	h	a	a	h	h	a	h	h	b	h	h	h	h	b	h
Block31470	Chr.4	2475302	2483007	b	a	h	a	a	h	h	h	h	h	h	h	h	h	h	a	h	a	b	b	a	b	h	a	b	a	h	h	b	h	h	h	a	a	h	h	a	h	h	b	h	h	h	h	b	h
Block31473	Chr.4	2486566	2491887	b	a	h	a	a	h	h	h	a	h	h	h	h	h	h	a	h	a	b	b	a	b	h	a	b	a	a	a	b	h	h	h	a	a	h	h	a	h	h	b	h	h	h	h	b	h
Block31495	Chr.4	2511787	2518507	b	a	h	a	a	a	h	h	a	h	h	h	h	h	h	a	h	a	b	b	a	b	h	a	b	a	h	a	b	h	h	h	a	a	h	h	a	h	h	b	h	h	h	h	b	h
Block31496	Chr.4	2518668	2541526	b	a	h	a	a	a	h	h	h	h	h	h	h	h	h	a	h	a	b	b	a	b	h	a	h	a	h	h	b	h	h	h	a	a	h	h	a	h	h	b	h	a	h	h	h	h
Block31526	Chr.4	2555798	2631900	b	a	h	a	a	h	h	h	h	h	h	h	h	h	h	a	h	a	b	b	a	b	h	a	h	a	h	h	b	h	h	h	a	a	h	h	a	h	h	b	h	h	h	h	h	h
Block31528	Chr.4	2677352	2707682	b	a	h	a	a	h	h	h	h	h	h	h	h	h	h	a	h	a	b	b	a	b	h	a	h	a	h	h	b	h	h	h	a	a	h	h	a	h	h	b	h	h	h	h	h	h
Block31530	Chr.4	2726280	2748245	b	a	h	a	a	h	h	h	h	h	h	h	h	h	h	a	h	a	b	b	a	b	h	a	h	a	h	h	b	h	h	h	a	a	h	h	a	h	h	b	h	h	h	h	h	h
Block31531	Chr.4	2748275	2804130	b	a	h	a	a	h	h	h	h	h	h	h	h	h	h	a	h	a	b	b	a	b	h	a	h	a	h	h	b	h	h	h	a	a	h	h	a	h	h	b	h	h	h	h	h	h
Block31532	Chr.4	2815904	2837559	b	a	h	a	a	h	h	h	h	h	h	h	h	h	h	a	h	a	b	b	a	b	h	a	h	a	h	h	b	h	h	h	a	a	h	h	a	h	h	b	h	h	h	h	h	h
Block31533	Chr.4	2840819	2997600	b	a	h	a	a	h	h	h	h	h	h	h	h	h	h	a	h	a	b	b	a	b	h	a	h	a	h	h	b	h	h	h	a	a	h	h	a	h	h	b	h	h	h	h	h	h
Block31534	Chr.4	3016648	3021934	b	a	h	a	a	h	h	h	h	h	h	h	h	h	h	a	h	a	b	b	a	b	h	a	h	a	h	h	b	h	h	h	a	a	h	h	a	h	h	b	h	h	h	h	h	h
Block31535	Chr.4	3072666	3084034	b	a	h	a	a	h	h	h	h	h	h	h	h	h	h	a	h	a	b	b	a	b	h	a	h	a	h	h	b	h	h	h	a	a	h	h	a	h	h	b	h	h	h	h	h	h
Block31536	Chr.4	3093149	3168731	b	a	h	a	a	h	h	h	h	h	h	h	h	h	h	a	h	a	b	b	a	b	h	a	h	a	h	h	b	h	h	h	a	a	h	h	a	h	h	b	h	h	h	h	h	h
Block31538	Chr.4	3178028	3246757	b	a	h	a	a	h	h	h	h	h	h	h	h	h	h	a	h	a	b	b	a	b	h	a	h	a	h	h	b	h	h	h	a	a	h	h	a	h	h	b	h	h	h	h	h	h
Block31541	Chr.4	3257888	3291219	b	a	h	a	a	h	h	h	h	h	h	h	h	h	h	a	h	a	b	b	a	b	h	a	h	a	h	h	b	h	h	h	a	a	h	h	a	h	h	b	h	h	h	h	h	h
Block31542	Chr.4	3298159	3370967	b	a	h	a	a	h	h	h	h	h	h	h	h	h	h	a	h	a	b	b	a	b	h	a	h	a	h	h	b	h	h	h	a	a	h	h	a	h	h	b	h	h	h	h	h	h
Block31544	Chr.4	3382151	3538479	b	a	h	a	a	h	h	h	h	h	h	h	h	h	h	a	h	a	b	b	a	b	h	a	h	a	h	h	b	h	h	h	a	a	h	h	a	h	a	b	h	h	h	h	h	h
Block31549	Chr.4	3598413	3610095	b	a	h	a	a	h	h	h	h	h	h	h	h	h	h	a	h	a	b	b	a	b	h	a	h	a	h	h	b	h	h	h	a	a	h	h	a	h	a	b	h	h	h	h	h	h
Block31550	Chr.4	3617453	3668983	b	a	h	a	h	h	h	h	h	h	h	h	h	h	h	a	h	a	b	b	a	b	h	a	h	a	h	h	b	h	h	h	a	a	h	h	a	h	a	b	h	h	h	h	h	h
Block31551	Chr.4	3686274	3722159	b	a	h	a	h	h	h	h	h	h	h	h	b	h	h	a	h	a	b	b	h	b	h	a	h	a	h	h	b	h	h	h	a	a	h	h	a	a	a	b	h	h	b	a	h	h
Block31561	Chr.4	3812872	5263849	b	a	h	a	h	h	h	h	h	h	h	h	b	h	h	a	h	a	b	b	h	b	h	a	b	a	h	h	b	h	h	h	a	a	h	h	a	a	a	b	h	h	b	a	h	h
Block31567	Chr.4	6925796	7015903	b	a	h	a	h	h	h	h	h	h	h	h	b	h	a	a	h	a	b	b	h	b	h	a	b	a	h	h	b	h	h	h	a	a	h	h	a	a	a	b	h	b	b	a	h	h
Block31569	Chr.4	7052476	7081265	b	a	h	a	h	h	h	h	h	h	h	h	b	h	a	a	h	a	b	b	h	b	h	a	b	a	h	h	b	h	h	h	a	a	h	h	a	a	a	b	h	b	b	a	h	h
Block31571	Chr.4	7102647	7138436	b	a	h	a	h	h	h	h	h	h	h	h	b	h	a	a	h	a	b	b	h	b	h	a	b	a	h	h	b	h	h	h	a	a	h	h	a	a	a	h	h	b	b	a	h	h
Block31573	Chr.4	7186042	7194295	b	a	h	a	h	h	h	h	h	h	h	h	b	h	a	a	h	a	b	b	h	b	h	a	b	a	h	h	b	h	h	h	a	a	h	h	a	a	a	h	h	b	b	a	h	h
Block31574	Chr.4	7218893	7338198	b	a	h	a	h	h	h	h	h	h	h	h	b	h	a	a	h	a	b	b	h	b	h	a	b	a	h	h	b	h	h	h	a	a	h	h	a	a	a	h	h	b	b	a	h	h
Block31575	Chr.4	7346883	7533833	b	a	h	a	h	h	h	h	h	h	h	h	b	h	a	a	h	a	b	b	h	b	h	a	b	a	h	h	b	h	h	h	a	a	h	h	a	a	a	h	h	b	b	a	h	h
Block31576	Chr.4	7536477	7600321	b	a	h	a	h	h	h	h	h	h	h	h	b	h	a	a	h	a	b	b	h	b	h	a	b	a	h	h	b	h	h	h	a	a	h	h	a	a	a	h	h	b	b	a	h	h
Block31578	Chr.4	7614626	7651730	b	a	h	a	h	h	h	h	h	h	h	h	b	h	a	a	h	a	b	b	h	b	h	a	b	a	h	h	b	h	h	h	a	a	h	h	a	a	a	h	h	b	b	a	h	h
Block31594	Chr.4	7673710	7698005	b	a	h	a	h	h	h	h	h	h	h	h	b	h	a	a	h	a	b	b	h	b	h	a	b	a	h	h	b	h	h	h	a	a	h	h	a	a	a	a	h	b	b	a	h	h
Block31597	Chr.4	7719531	7731563	b	a	h	a	h	h	h	h	h	h	h	h	b	h	a	a	h	a	b	b	a	b	h	a	b	a	h	h	b	h	h	h	a	a	h	h	a	a	a	h	h	b	b	a	h	h
Block31616	Chr.4	7765494	7773471	b	a	h	a	h	h	h	h	h	h	h	h	b	h	a	a	h	a	b	b	a	b	h	a	b	a	h	h	b	h	h	h	a	a	h	h	a	a	a	h	h	b	b	a	h	h
Block31619	Chr.4	7781843	7789983	b	a	h	a	h	h	h	h	h	h	h	h	b	h	a	a	h	a	b	b	a	b	h	a	b	a	h	h	b	h	h	h	a	a	h	h	a	a	a	h	h	b	b	a	h	h
Block31621	Chr.4	7800357	7847410	b	a	h	a	h	h	h	h	h	h	h	h	b	h	a	a	h	a	b	b	h	b	h	a	b	a	h	h	b	h	h	h	a	a	h	h	a	a	a	h	h	b	b	a	h	h
Block31623	Chr.4	7862466	7941436	b	a	h	a	h	h	h	h	h	h	h	h	b	h	a	a	h	a	b	b	h	b	h	a	b	a	h	h	b	h	h	h	a	a	h	h	a	a	a	h	h	b	b	a	h	h
Block31624	Chr.4	7945358	8159967	b	a	h	a	h	h	h	h	h	h	h	h	b	h	a	a	h	a	b	b	h	b	h	a	b	a	h	h	b	h	h	h	a	a	h	h	a	a	a	h	h	b	b	a	h	h
Block31626	Chr.4	8172950	8304172	b	a	h	a	h	h	h	h	h	h	h	h	b	h	a	a	h	a	b	b	h	b	h	a	b	a	h	h	b	h	h	h	a	a	h	h	a	a	a	h	h	b	b	a	h	h
Block31627	Chr.4	8308027	8378620	b	a	h	a	h	h	h	h	h	h	h	h	b	h	a	a	h	a	b	b	h	b	h	a	b	a	h	h	b	h	h	h	a	a	h	h	a	a	a	h	h	b	b	a	h	h
Block31628	Chr.4	8381493	8398802	b	a	h	a	h	h	h	h	h	h	h	h	b	h	a	a	h	a	b	b	h	b	h	a	b	a	h	a	b	h	h	h	a	a	h	h	a	a	a	h	h	b	b	a	h	h
Block31629	Chr.4	8411843	8448021	b	a	h	a	h	h	h	h	h	h	h	h	b	h	a	a	h	a	b	b	h	b	h	a	b	a	h	a	b	h	h	h	a	a	h	h	a	a	a	h	h	b	b	a	h	h
Block31630	Chr.4	8479810	8493184	b	a	h	a	h	h	h	h	h	h	h	h	b	h	a	a	h	a	b	b	h	b	h	a	b	a	h	a	b	h	h	h	a	a	h	h	a	a	a	h	h	b	b	a	h	h
Block31631	Chr.4	8497881	8703611	b	a	h	a	h	h	h	h	h	h	h	h	b	h	a	a	h	a	b	b	h	b	h	a	b	a	h	a	b	h	h	h	a	a	h	h	a	a	a	h	h	b	b	a	h	h
Block31632	Chr.4	8705137	8776419	b	a	h	a	h	h	h	h	h	h	h	h	b	h	a	a	h	a	b	b	h	b	h	a	b	a	h	h	b	h	h	h	a	a	h	h	a	a	a	h	h	b	b	a	h	h
Block31633	Chr.4	8789581	9013089	b	a	h	a	h	h	h	h	h	h	h	h	b	h	a	a	h	a	b	b	h	b	h	a	b	a	h	h	b	h	h	h	a	a	h	h	a	a	a	h	h	b	b	a	h	h
Block31634	Chr.4	9033268	9109250	b	a	h	a	h	h	h	h	h	h	h	h	b	h	a	a	h	a	b	b	h	b	h	a	b	a	h	h	b	h	h	h	a	a	h	h	a	a	a	h	h	b	b	a	h	h
Block31635	Chr.4	9111069	9310212	b	a	h	a	h	h	h	h	h	h	h	h	b	h	a	a	h	a	b	b	h	b	h	a	b	a	h	h	b	h	h	h	a	a	h	h	a	a	a	h	h	b	b	a	h	h
Block31638	Chr.4	9391113	9503484	b	a	h	a	h	h	h	h	h	h	h	h	b	h	a	a	h	a	b	b	h	b	h	a	b	a	h	h	b	h	h	h	a	a	a	h	a	a	a	h	h	b	b	a	h	h
Block31639	Chr.4	9504365	9728539	b	a	h	a	h	h	h	h	h	h	h	h	b	h	a	a	h	a	b	b	h	b	h	a	b	a	h	h	b	h	h	h	a	a	a	h	a	a	a	h	h	b	b	a	h	h
Block31641	Chr.4	9734145	9748438	b	a	h	a	h	h	h	h	h	h	h	h	b	h	a	a	h	a	b	h	h	b	h	a	b	a	h	h	h	h	a	h	a	a	a	h	a	a	a	h	h	h	h	a	h	h
Block31651	Chr.4	9803256	9839310	h	a	h	a	h	h	h	h	h	h	h	h	b	h	a	a	h	a	b	h	h	b	h	a	b	a	h	h	h	h	a	h	a	a	a	h	a	a	a	h	h	h	h	a	h	h
Block31652	Chr.4	9839783	9897507	h	a	h	a	h	h	h	h	h	h	h	h	b	h	a	a	h	a	b	h	h	b	h	a	b	a	h	h	h	h	a	h	a	a	h	h	a	a	a	h	h	h	h	a	h	h
Block31653	Chr.4	9900983	9914445	h	a	h	a	h	h	h	h	h	h	h	h	b	h	a	a	h	a	b	h	h	b	h	a	b	a	h	h	h	h	a	h	a	a	h	h	a	a	a	h	h	b	h	a	h	h
Block31654	Chr.4	9940193	9948202	h	a	h	a	h	h	h	h	h	h	h	h	b	h	a	a	h	a	b	h	h	b	h	a	b	a	h	h	h	h	a	h	a	a	h	h	a	a	a	h	h	b	h	a	h	h
Block31655	Chr.4	9972455	10007205	h	a	h	a	h	h	h	h	h	h	h	h	b	h	a	a	h	a	b	h	h	b	h	a	b	a	h	h	h	h	a	h	a	a	h	h	a	a	a	h	h	b	h	a	h	h
Block31656	Chr.4	10024543	10045337	h	a	h	a	h	h	h	h	h	h	h	h	b	h	a	a	h	a	b	b	h	b	h	a	b	a	h	h	b	h	h	h	a	a	h	h	a	a	a	h	h	b	b	a	h	h
Block31664	Chr.4	10062578	10070295	b	a	h	a	h	h	h	h	h	h	h	h	b	h	a	a	h	a	b	b	h	b	h	a	b	a	h	h	b	h	h	h	a	a	h	h	a	a	a	h	h	b	b	a	h	h
Block31665	Chr.4	10071241	10076843	b	a	h	a	h	h	h	h	h	h	h	h	b	h	a	a	h	a	b	b	h	b	h	a	b	a	h	h	b	h	h	h	a	a	h	h	a	a	a	h	h	b	b	a	h	h
Block31670	Chr.4	10084847	10091092	b	a	h	a	h	h	h	h	h	h	h	h	b	h	a	a	h	a	b	b	h	b	h	a	b	a	h	h	b	h	h	h	a	a	h	h	a	a	a	h	h	b	b	a	h	h
Block31671	Chr.4	10091189	10098283	b	a	h	a	h	h	h	h	h	h	h	h	b	h	a	a	h	a	b	b	h	b	h	a	b	a	h	h	b	h	h	h	a	a	h	h	a	a	a	h	h	b	b	a	h	h
Block31673	Chr.4	10099246	10104990	b	a	h	a	h	h	h	h	h	h	h	h	b	h	a	a	h	a	b	b	h	b	h	a	b	a	h	h	b	h	h	a	a	a	a	h	a	a	a	h	h	b	b	a	a	h
Block31707	Chr.4	10131670	10136960	b	a	h	a	h	h	h	h	h	h	h	h	b	h	a	a	h	a	b	b	a	b	h	a	b	a	h	h	b	h	a	h	a	a	h	h	a	a	a	h	h	b	b	a	h	h
Block31753	Chr.4	10166794	10180352	b	a	h	a	h	h	h	h	h	h	h	h	b	h	a	a	h	a	b	b	h	b	h	a	b	a	h	h	b	h	h	h	a	a	h	h	a	a	a	h	h	b	b	a	h	a
Block31883	Chr.4	10247263	10284667	b	a	h	a	h	h	a	h	h	h	h	h	b	h	a	a	h	a	b	b	h	b	h	a	b	a	h	h	b	a	h	h	a	a	h	h	a	a	a	h	h	b	b	a	h	a
Block31889	Chr.4	10306484	10313402	b	a	h	a	h	h	a	h	h	h	h	h	b	h	a	a	h	a	b	b	h	b	h	a	b	a	h	h	b	h	h	h	a	a	h	h	a	a	a	h	h	b	b	a	h	h
Block31938	Chr.4	10339624	10346095	b	a	h	a	h	h	h	h	h	h	h	h	b	h	a	a	h	a	b	b	h	b	h	a	b	a	h	a	b	h	h	h	a	a	h	h	a	a	a	h	h	b	b	a	h	h
Block31963	Chr.4	10373466	10380290	b	a	h	a	h	h	h	h	h	h	h	h	b	h	a	a	h	a	b	b	h	b	h	a	b	a	h	a	b	h	h	a	a	a	h	h	a	a	a	h	h	b	b	a	h	h
Block31965	Chr.4	10381018	10386868	b	a	h	a	h	h	h	h	h	a	h	h	b	h	a	a	h	a	b	b	h	b	h	a	b	a	h	h	b	h	a	a	a	a	h	h	a	a	a	h	h	b	b	a	a	a
Block32011	Chr.4	10428041	10433608	b	a	h	a	h	b	h	h	h	a	h	h	b	h	a	a	h	a	b	b	h	b	a	a	b	a	h	a	b	h	h	h	a	a	h	h	a	a	a	h	h	b	b	a	a	h
Block32116	Chr.4	10491370	10502716	b	a	h	a	h	b	h	h	h	h	h	h	b	h	a	a	h	a	b	b	h	b	h	a	b	a	h	a	b	h	h	h	a	a	h	a	a	a	a	h	h	b	b	a	a	h
Block32122	Chr.4	10504443	10514670	b	a	h	a	h	b	h	h	h	h	h	h	b	h	a	a	h	a	b	b	h	b	h	a	b	a	h	a	b	h	h	h	a	a	h	a	a	a	a	h	h	b	b	a	a	h
Block32125	Chr.4	10514946	10521968	b	a	h	a	h	b	h	h	h	h	h	h	b	h	a	a	h	a	b	b	h	b	h	a	b	a	h	h	b	h	h	h	a	a	h	h	a	a	a	h	h	b	b	a	h	a
Block32188	Chr.4	10573973	10579496	b	a	h	a	h	b	h	h	h	h	h	h	b	h	a	a	h	a	b	b	h	b	a	a	b	a	h	h	b	h	h	h	a	a	a	h	a	a	a	h	h	b	b	a	h	a
Block32198	Chr.4	10591264	10600592	b	a	h	a	h	b	h	h	h	h	h	h	b	h	a	a	h	a	b	b	h	b	h	a	b	a	h	h	b	h	h	h	a	a	a	h	a	a	a	h	h	b	b	a	h	a
Block32200	Chr.4	10610372	10615530	b	a	h	a	h	b	h	h	h	h	h	h	b	h	a	a	h	a	b	b	h	b	h	a	b	a	h	h	b	h	h	h	a	a	a	h	a	a	a	h	h	b	b	a	h	a
Block32201	Chr.4	10647336	10664387	b	a	h	a	h	b	h	h	h	h	h	h	b	h	a	a	h	a	b	b	h	b	h	a	b	a	h	h	b	h	h	h	a	a	a	h	a	a	a	h	h	b	b	a	h	a
Block32202	Chr.4	10702933	10727274	b	a	h	a	h	b	h	h	h	h	h	h	b	h	a	a	h	a	b	b	h	b	h	a	b	a	h	h	b	h	h	h	a	a	a	h	a	a	a	h	h	b	b	a	h	a
Block32203	Chr.4	10731948	10755326	b	a	h	a	h	b	h	h	h	h	h	h	b	h	a	a	h	a	b	b	h	b	h	a	b	a	h	h	b	h	h	h	a	a	a	h	a	a	a	h	h	b	b	a	h	a
Block32204	Chr.4	10760055	10783296	b	a	h	a	h	b	h	h	h	a	h	h	b	h	a	a	h	a	b	b	h	b	h	a	b	a	h	h	b	h	h	h	a	a	a	h	a	a	a	h	h	b	b	a	h	a
Block32205	Chr.4	10785274	10821539	b	a	h	a	h	b	h	h	h	a	h	h	b	h	a	a	h	a	b	b	h	b	h	a	b	a	h	h	b	h	h	h	a	a	a	h	a	a	a	h	h	b	b	a	h	h
Block32206	Chr.4	10838911	10881078	b	a	h	a	h	b	h	h	h	a	h	h	b	h	a	a	h	a	b	b	h	b	h	a	b	a	h	h	b	h	h	h	a	a	a	h	a	a	a	h	h	b	b	a	h	h
Block32207	Chr.4	10885173	10937930	b	a	h	a	h	b	h	h	h	a	h	h	b	h	a	a	h	a	b	b	h	b	h	a	b	a	h	h	b	h	h	h	a	a	a	h	a	a	a	h	h	b	b	a	h	h
Block32208	Chr.4	10950250	10959045	b	a	h	a	h	b	h	h	h	a	h	h	b	h	a	a	h	a	b	b	h	b	h	a	b	a	h	h	b	h	h	h	a	a	a	h	a	a	a	h	h	b	b	a	h	h
Block32209	Chr.4	10976684	11004978	b	a	h	a	h	b	h	h	h	a	h	h	b	h	a	a	h	a	b	b	h	b	h	a	b	a	h	h	b	h	h	h	a	a	a	h	a	a	a	h	h	b	b	a	h	h
Block32211	Chr.4	11037423	11048115	b	a	h	a	h	b	h	h	h	a	h	h	b	h	a	a	h	a	b	b	h	b	h	a	b	a	h	h	b	h	h	h	a	a	a	h	a	a	a	h	h	b	b	a	h	h
Block32213	Chr.4	11052057	11105291	b	a	h	a	h	b	h	h	h	a	h	h	b	h	a	a	h	a	b	b	h	b	h	a	b	a	h	h	b	h	h	h	a	a	a	h	a	a	a	h	h	b	b	a	h	h
Block32214	Chr.4	11110675	11190427	b	a	h	a	h	b	h	h	h	a	h	a	b	h	a	a	h	a	b	b	h	b	h	a	b	a	h	h	b	h	h	h	a	a	a	h	a	a	a	h	h	b	b	a	h	h
Block32215	Chr.4	11196444	11251091	b	a	h	a	h	b	h	h	h	a	h	a	b	h	a	a	h	a	b	b	h	b	h	a	b	a	h	h	b	h	h	h	a	a	h	h	a	a	a	h	h	b	b	a	h	h
Block32216	Chr.4	11261119	11269164	b	a	h	a	h	b	h	h	h	a	h	a	b	h	a	a	h	a	b	b	h	b	h	a	b	a	h	h	b	h	h	h	a	a	h	h	a	a	a	h	h	b	b	a	h	h
Block32217	Chr.4	11269971	11327088	b	a	h	a	h	b	h	h	h	h	h	a	b	h	a	a	h	a	b	b	h	b	h	a	b	a	h	h	b	h	h	h	a	a	h	h	a	a	a	h	h	b	b	a	h	h
Block32218	Chr.4	11353998	11383191	b	a	h	a	h	b	h	h	h	h	h	a	b	h	a	a	h	a	b	b	h	b	h	a	b	a	h	h	b	h	h	h	a	a	h	h	a	a	a	h	h	b	b	a	h	h
Block32221	Chr.4	11398706	11439902	b	a	h	a	h	b	h	h	h	h	h	h	b	h	a	a	h	a	b	b	h	b	h	a	b	a	h	h	b	h	h	h	a	a	h	h	a	a	a	h	h	b	b	a	h	h
Block32222	Chr.4	11449101	11454787	b	a	h	a	h	b	h	h	h	h	h	h	b	h	a	a	h	a	b	b	h	b	h	a	b	a	h	h	b	h	h	h	a	a	h	h	a	a	a	h	h	b	b	a	h	h
Block32223	Chr.4	11456440	11717999	b	a	h	a	h	b	h	h	h	h	h	h	b	h	a	a	h	a	b	b	h	b	h	a	b	a	h	h	b	h	h	h	a	a	h	h	a	a	a	h	h	b	b	a	h	h
Block32224	Chr.4	11720142	11750641	b	a	h	a	h	b	h	h	h	h	h	h	b	h	a	a	h	a	b	b	h	b	h	a	b	a	h	h	b	h	h	h	a	a	h	h	a	a	a	h	h	b	b	a	h	h
Block32225	Chr.4	11751304	11891318	b	a	h	a	h	b	h	h	h	h	h	h	b	h	a	a	h	a	b	b	h	b	h	a	b	a	h	h	b	h	h	h	a	a	h	h	a	a	a	h	h	b	b	a	h	h
Block32226	Chr.4	11897890	12022635	b	a	h	a	h	b	h	h	h	h	h	h	b	h	a	a	h	a	b	b	h	b	h	a	b	a	h	h	b	h	h	h	a	a	h	h	a	a	a	h	h	b	b	a	h	h
Block32227	Chr.4	12041020	12268015	b	a	h	a	h	b	h	h	h	h	h	h	b	h	a	a	h	a	b	b	h	b	h	a	b	a	h	h	b	h	h	h	a	a	h	h	a	a	a	h	h	b	b	a	h	h
Block32228	Chr.4	12273380	12370448	b	a	h	a	h	b	h	h	h	h	h	h	b	h	a	a	h	a	b	b	h	b	h	a	b	a	h	h	b	h	h	h	a	a	h	a	a	a	a	h	h	b	b	a	h	h
Block32229	Chr.4	12384841	12412870	b	a	h	a	h	b	h	h	h	h	h	h	b	h	a	a	h	a	b	b	h	b	h	a	b	a	h	h	b	h	h	h	a	a	h	a	a	a	a	h	h	b	b	a	h	h
Block32231	Chr.4	12424850	12527341	b	a	h	a	h	b	h	h	h	a	h	h	b	h	a	a	h	a	b	b	h	b	a	a	b	a	h	h	b	h	h	h	a	a	h	a	a	a	a	h	h	b	b	a	h	h
Block32232	Chr.4	12528192	12568662	b	a	h	a	h	b	h	h	h	a	h	h	b	h	a	a	h	a	b	b	a	b	a	a	b	a	h	h	b	h	h	h	a	a	h	a	a	a	a	h	h	b	b	a	h	h
Block32234	Chr.4	12579905	12588323	b	a	h	a	h	b	h	h	h	a	h	h	b	h	a	a	h	a	b	b	a	b	a	a	b	a	h	h	b	h	h	h	a	a	h	a	a	a	a	h	h	b	b	a	h	h
Block32235	Chr.4	12613442	12645213	b	a	h	a	h	b	h	h	h	a	h	h	b	h	a	a	h	a	b	b	a	b	a	a	b	a	h	h	b	h	h	h	a	a	h	a	a	a	a	h	h	b	b	a	h	h
Block32237	Chr.4	12646619	12663232	b	a	h	a	h	b	h	h	h	a	h	h	b	h	a	a	h	a	b	b	a	b	a	a	b	a	h	h	b	h	h	h	a	a	h	a	a	a	a	h	h	b	b	a	h	a
Block32239	Chr.4	12664646	12684169	b	a	h	a	h	b	h	h	h	a	h	h	b	h	a	a	h	a	b	b	a	b	a	a	b	a	h	h	b	h	h	h	a	a	h	a	a	a	a	h	h	b	b	a	h	a
Block32240	Chr.4	12699401	12716391	b	a	h	a	h	b	h	h	b	h	h	h	h	h	a	a	h	a	b	b	h	b	a	a	h	a	h	a	b	a	h	h	a	a	h	h	a	a	a	h	h	b	h	a	b	a
Block32285	Chr.4	13535089	13553064	b	a	h	a	h	b	a	h	b	h	h	h	h	h	a	a	h	a	b	b	h	b	h	a	h	a	h	a	b	a	h	h	a	a	h	h	a	a	a	h	h	b	h	a	b	a
Block32286	Chr.4	13592781	13619001	b	a	h	a	h	b	a	h	b	h	h	h	h	h	a	a	h	a	b	b	h	b	h	a	h	a	h	a	b	a	h	h	a	a	h	h	a	a	a	h	h	b	h	a	b	a
Block32287	Chr.4	13624386	13639865	b	a	h	a	h	b	a	h	b	h	h	h	h	h	a	a	h	a	b	b	h	b	h	a	h	a	h	a	b	a	h	h	a	a	h	h	a	a	a	h	h	b	h	a	b	a
Block32290	Chr.4	13680889	13686183	b	a	h	a	h	b	a	h	b	h	h	h	h	h	a	a	h	a	b	b	h	b	h	a	h	a	h	a	b	a	h	h	a	a	h	h	a	a	a	h	h	b	h	a	b	h
Block32291	Chr.4	13686636	13763868	b	a	h	a	h	b	a	h	b	h	h	h	h	h	a	a	h	a	b	b	h	b	h	a	h	a	h	a	b	a	h	h	a	a	h	h	a	a	a	h	h	b	h	a	b	h
Block32292	Chr.4	13766742	13799101	b	a	h	a	h	b	a	h	b	h	h	h	h	h	a	a	h	a	b	b	h	b	h	a	h	a	h	a	b	a	h	h	a	a	h	h	a	a	a	h	h	b	h	a	b	h
Block32294	Chr.4	13832526	13856848	b	a	h	a	h	b	a	h	b	h	h	h	h	h	a	a	h	a	b	b	h	b	h	a	h	a	h	a	b	a	h	h	a	a	h	h	a	a	a	h	h	b	h	a	b	h
Block32295	Chr.4	13856883	13894683	b	a	h	a	h	b	a	h	b	h	h	h	h	h	a	a	h	a	b	b	h	b	h	a	h	a	h	a	b	a	h	h	a	a	h	h	a	a	a	h	h	b	h	a	b	h
Block32296	Chr.4	13896384	13931069	b	a	h	a	h	b	a	h	b	h	h	h	h	h	a	a	h	a	b	b	h	b	h	a	h	a	h	a	b	a	h	h	a	a	h	h	a	a	a	h	h	b	h	a	b	h
Block32299	Chr.4	13937066	13945045	b	a	h	a	h	b	a	h	b	h	h	h	h	h	a	a	h	a	b	b	h	b	h	a	h	a	h	a	b	a	h	h	a	a	h	h	h	a	a	h	h	b	b	a	b	h
Block32318	Chr.4	14270689	14287877	b	a	h	a	h	b	h	h	b	h	h	h	h	h	a	a	h	a	b	b	h	b	h	a	h	a	h	a	b	a	h	h	a	a	h	h	h	a	a	h	h	b	b	a	b	h
Block32319	Chr.4	14288827	14348085	b	a	h	a	h	b	h	h	b	h	h	h	h	h	a	a	h	a	b	b	h	b	h	a	h	a	h	a	b	a	h	h	a	a	h	h	h	a	a	h	h	b	b	a	b	h
Block32321	Chr.4	14359290	14458820	b	a	h	a	h	b	h	h	b	h	h	h	h	h	a	a	h	a	b	b	h	b	h	a	h	a	h	a	b	a	h	h	a	a	h	h	h	a	a	h	h	b	b	a	b	h
Block32322	Chr.4	14460818	14635068	b	a	h	a	h	b	h	h	b	h	h	h	h	h	a	a	h	a	b	b	a	b	h	a	h	a	h	a	b	a	h	h	a	a	h	h	h	a	a	h	h	b	b	a	b	h
Block32323	Chr.4	14639457	14846910	b	a	h	a	h	b	h	h	b	h	h	h	h	h	a	a	h	a	b	b	a	b	h	a	h	a	h	a	b	a	h	h	a	a	h	h	h	a	a	h	h	b	b	a	b	h
Block32324	Chr.4	14860147	14868944	b	a	h	a	h	b	h	h	b	h	h	h	h	h	a	a	h	a	b	b	a	b	h	a	h	a	h	a	b	a	h	h	a	a	h	h	h	a	a	h	h	b	b	a	b	h
Block32325	Chr.4	14871952	14937712	b	a	h	a	h	b	h	h	b	h	h	h	h	h	a	a	h	a	b	b	a	b	h	a	h	a	h	a	b	a	h	h	a	a	h	h	h	a	a	h	h	b	b	a	b	h
Block32326	Chr.4	14939167	15111814	b	a	h	a	h	b	h	h	b	h	h	h	h	h	a	a	h	a	b	b	h	b	h	a	h	a	h	a	b	a	h	h	a	a	h	h	h	a	a	h	h	b	b	a	b	h
Block32330	Chr.4	15142226	15208609	b	a	h	a	h	b	h	h	b	h	h	h	h	h	a	a	h	a	b	b	h	b	h	a	h	a	h	a	b	a	h	h	a	a	b	h	h	a	a	h	h	b	b	a	b	h
Block32331	Chr.4	15227225	15275699	b	a	h	a	h	b	h	h	b	h	h	h	h	h	a	a	h	a	b	b	h	b	h	a	h	a	h	a	b	a	h	h	a	a	b	h	h	a	a	h	h	b	b	a	b	h
Block32332	Chr.4	15287432	15400543	b	a	h	a	h	b	h	h	b	h	h	h	h	h	a	a	h	a	b	b	h	b	h	a	h	a	h	a	b	a	h	h	a	a	b	h	h	a	a	h	h	b	b	a	b	h
Block32333	Chr.4	15400933	15428402	b	a	h	a	h	b	h	h	b	h	h	h	h	h	a	a	h	a	b	b	h	b	h	a	h	a	h	a	b	a	h	h	a	a	b	h	h	a	a	h	h	b	b	a	b	h
Block32334	Chr.4	15442872	15529631	b	a	h	a	h	b	h	h	b	h	h	h	h	h	a	a	h	a	b	b	h	b	h	a	h	a	h	a	b	a	h	h	a	a	b	h	h	a	a	h	h	b	b	a	b	h
Block32335	Chr.4	15537835	15775132	b	a	h	a	h	b	h	h	b	h	h	h	h	h	a	a	h	a	b	b	h	b	h	a	h	a	h	a	b	a	h	h	a	a	b	h	h	a	a	h	h	b	b	a	b	h
Block32336	Chr.4	15777125	16033561	b	a	h	a	h	b	h	h	b	h	h	h	h	h	a	a	h	a	b	b	h	b	h	a	h	a	h	a	b	a	h	h	a	a	b	h	h	a	a	h	h	b	b	a	b	h
Block32337	Chr.4	16036253	16043274	b	a	h	a	h	b	h	h	b	h	h	h	h	h	a	a	h	a	b	b	h	b	h	a	h	a	h	a	b	a	h	h	a	a	b	h	h	a	a	h	h	b	b	a	b	h
Block32338	Chr.4	16048089	16070071	b	a	h	a	h	b	h	h	b	h	h	h	h	h	a	a	h	a	b	b	h	b	h	a	h	a	h	a	b	a	h	h	a	a	b	h	h	a	a	h	h	b	b	a	b	h
Block32341	Chr.4	16077830	16086485	b	a	h	a	h	b	h	h	b	h	h	h	h	h	a	a	h	a	b	b	h	b	h	a	h	a	h	a	b	a	h	h	a	a	b	h	h	a	a	h	h	b	b	a	b	h
Block32342	Chr.4	16087461	16134627	b	a	h	a	h	b	h	h	b	h	h	h	h	h	a	a	h	a	b	b	h	b	h	a	h	a	h	a	b	a	h	h	a	a	b	h	h	a	a	h	h	b	b	a	b	h
Block32343	Chr.4	16139120	16165995	b	a	h	a	h	b	h	h	b	h	h	h	h	h	a	a	h	a	b	b	h	b	h	a	h	a	h	a	b	a	h	h	a	a	h	h	h	a	a	h	h	b	b	a	b	h
Block32345	Chr.4	16168395	16176374	b	a	h	a	h	b	h	h	b	a	h	h	h	h	a	a	h	h	b	h	h	h	h	h	a	a	h	h	h	a	a	a	a	a	h	a	h	a	a	a	h	b	b	a	b	h
Block32978	Chr.4	32052756	32081667	a	a	h	a	h	h	a	h	b	a	h	h	h	h	a	a	h	h	b	h	h	h	h	h	a	a	h	h	h	a	a	a	a	a	h	a	h	a	a	a	h	b	b	h	b	h
Block32984	Chr.4	32127150	32150863	a	a	h	a	h	a	a	h	b	a	h	h	h	h	a	a	h	h	b	h	h	h	h	h	a	a	h	h	h	a	a	a	a	a	h	a	h	a	a	a	h	b	b	h	b	h
Block32985	Chr.4	32151273	32209116	a	a	h	a	h	a	a	h	b	a	h	h	h	h	a	a	h	h	b	h	h	h	h	h	a	a	h	h	h	a	a	a	a	a	h	a	h	a	a	a	h	b	b	h	b	h
Block32986	Chr.4	32220855	32236198	a	a	h	a	h	a	a	h	b	a	h	h	h	h	a	a	h	h	b	h	h	h	h	h	a	a	h	h	h	a	a	a	a	a	h	a	h	a	a	a	h	b	b	h	b	h
Block32987	Chr.4	32241106	32251673	a	a	h	a	h	a	a	h	b	a	h	h	h	h	a	a	h	h	b	h	h	h	h	h	a	a	h	h	h	a	a	a	a	a	h	a	h	a	a	a	h	b	b	h	b	h
Block32988	Chr.4	32252053	32268256	a	a	h	a	h	a	a	h	b	a	h	h	h	h	a	a	h	h	b	h	h	h	h	h	a	a	h	h	h	a	h	a	a	a	h	a	h	a	a	a	h	b	b	h	b	h
Block32990	Chr.4	32279408	32286427	a	a	h	a	h	a	a	h	b	a	h	h	h	h	a	a	h	h	b	h	h	h	h	h	a	a	h	h	h	a	h	h	h	a	h	a	h	a	a	a	h	b	b	h	b	h
Block32991	Chr.4	32306329	32344265	a	a	h	a	h	a	a	h	b	a	h	h	h	h	a	a	h	h	b	h	h	h	h	h	a	a	h	h	h	a	h	h	h	a	h	a	h	a	a	a	h	b	b	h	b	h
Block32992	Chr.4	32344718	32384222	a	a	h	a	h	a	a	h	b	a	h	h	h	h	a	a	h	h	b	h	h	h	h	h	a	a	h	h	h	a	h	h	h	a	h	a	h	a	a	a	h	b	b	h	b	h
Block32993	Chr.4	32392714	32403743	a	a	h	a	h	a	a	h	b	a	h	h	h	h	a	a	h	h	b	h	h	h	h	h	a	a	h	h	h	a	h	h	h	a	h	a	h	a	a	a	h	b	b	h	b	h
Block32995	Chr.4	32413056	32440209	a	a	h	a	h	a	a	h	h	a	h	h	h	h	a	a	h	h	b	h	h	h	h	h	a	a	h	h	h	a	h	h	h	a	h	a	h	a	a	a	h	b	b	h	b	h
Block32996	Chr.4	32440697	32446251	a	a	h	a	h	a	a	h	h	a	h	h	h	h	a	a	h	h	b	h	h	h	h	h	a	a	h	h	h	a	h	h	h	a	h	a	h	a	a	a	h	b	b	h	b	h
Block32997	Chr.4	32447526	32459030	a	a	h	a	h	a	a	h	h	a	h	h	h	h	a	a	h	h	h	h	h	h	h	h	a	h	h	h	h	h	h	h	h	a	h	a	h	a	a	a	h	b	b	h	b	h
Block33018	Chr.4	33921692	33937306	a	a	h	a	b	a	a	h	h	a	h	h	h	h	a	a	h	h	h	h	h	h	h	h	a	h	h	h	h	h	h	h	h	a	h	a	h	a	a	a	h	b	b	h	b	h
Block33019	Chr.4	33948252	33988857	a	a	h	a	b	a	a	b	h	a	h	h	h	h	a	a	h	b	a	h	h	h	b	b	a	h	h	a	b	h	h	h	h	a	b	a	h	a	a	a	h	b	b	h	b	h
Block33184	Chr.4	34265774	34273642	a	a	h	a	b	a	h	h	h	a	h	a	h	h	a	a	a	b	h	h	a	h	h	b	a	h	b	h	b	h	h	h	h	a	b	a	h	a	a	a	h	b	b	h	b	h
Block33793	Chr.4	35140858	35147394	a	a	h	a	b	a	h	h	h	a	h	h	h	h	a	a	h	b	h	h	a	h	h	b	a	h	b	h	b	h	h	h	h	a	b	a	h	a	a	a	h	b	b	h	b	h
Block33800	Chr.4	35150443	35158149	a	a	h	a	b	a	h	h	h	a	h	h	h	h	a	a	h	b	h	h	h	h	h	b	a	h	b	h	b	h	h	h	h	a	b	a	h	a	a	a	h	b	b	h	b	h
Block33847	Chr.4	35198440	35225983	a	a	h	a	b	a	h	h	h	a	a	h	h	h	a	a	h	b	h	h	a	h	a	b	a	h	b	h	b	h	h	a	h	a	b	a	h	a	a	a	h	b	b	a	b	h
Block33853	Chr.4	35226358	35231575	a	a	h	a	b	a	h	h	h	a	h	h	h	h	a	a	h	b	h	h	h	h	h	b	a	h	b	h	b	h	h	h	h	a	b	a	h	a	a	a	h	b	b	h	b	a
Block34659	Chr.4	36119119	36125622	a	a	h	a	b	a	h	h	h	a	h	h	h	h	a	a	h	b	h	h	h	h	h	b	a	h	b	h	b	a	h	h	h	a	b	a	h	a	a	a	h	b	b	h	b	a
Block34666	Chr.4	36133376	36143432	a	a	h	a	b	a	h	h	h	a	h	h	h	h	a	a	h	b	h	h	h	h	h	b	a	h	b	h	b	h	h	h	h	a	b	a	h	a	a	a	h	b	b	h	b	a
Block34851	Chr.4	36237425	36244742	a	a	h	a	b	a	h	h	h	a	h	h	h	h	a	a	h	b	h	h	h	h	h	b	a	h	b	h	b	h	h	h	h	a	b	a	h	a	a	a	h	b	b	h	b	a
Block34855	Chr.4	36246758	36254125	a	a	h	a	b	a	h	h	h	a	h	h	a	a	a	a	h	b	h	h	h	h	h	b	a	h	b	h	b	h	h	h	h	a	b	a	h	a	a	a	h	b	b	h	b	a
Block34883	Chr.4	36259805	36265703	a	a	h	a	b	a	h	h	h	a	h	h	a	a	a	a	h	b	h	h	h	h	a	b	a	h	b	h	b	h	h	a	h	a	b	a	h	a	a	a	h	b	b	a	b	a
Block34892	Chr.4	36273431	36297206	a	a	a	a	b	a	h	h	h	a	h	h	a	a	a	a	h	b	h	h	h	h	a	b	a	h	b	h	b	h	h	a	h	a	b	a	h	a	a	a	h	b	b	a	b	a
Block34893	Chr.4	36297248	36320042	a	a	a	a	b	a	h	h	h	a	h	h	h	h	a	a	h	b	h	h	h	h	a	b	a	h	b	h	b	h	h	h	a	a	h	a	h	a	a	a	h	b	b	h	b	a
Block34930	Chr.4	36365888	36372582	a	a	h	a	b	a	h	h	a	a	h	h	h	h	a	a	a	b	h	h	h	h	a	b	a	h	a	h	b	h	h	h	h	a	h	a	h	a	a	a	h	b	b	h	b	a
Block34977	Chr.4	36426260	36467811	a	a	a	a	b	a	h	h	a	a	h	h	h	h	a	a	a	b	h	h	h	h	a	b	a	h	a	h	b	h	h	h	h	a	h	a	h	a	a	a	h	b	b	h	b	a
Block34978	Chr.4	36469176	36478066	a	a	a	a	b	a	h	h	h	a	h	h	h	h	a	a	h	b	h	h	h	h	a	b	a	h	h	a	b	h	h	h	h	a	h	a	h	a	a	a	h	b	b	h	b	a
Block35037	Chr.4	36514242	36519678	a	a	h	a	b	a	h	h	h	a	h	h	h	h	a	a	h	b	h	h	h	h	a	b	a	h	h	a	b	h	h	h	h	a	h	a	a	a	a	a	h	b	b	h	b	a
Block35038	Chr.4	36519693	36525769	a	a	h	a	b	a	h	a	h	a	h	h	h	h	a	a	h	b	h	h	h	h	a	b	a	a	h	h	b	a	h	h	h	a	h	a	a	a	a	a	h	b	b	h	b	a
Block35061	Chr.4	36565979	36581906	a	a	h	a	b	a	h	a	h	a	h	h	h	h	a	a	h	b	h	h	h	h	a	b	a	a	h	h	b	h	h	h	h	a	h	a	a	a	a	a	h	b	b	h	b	a
Block35062	Chr.4	36582575	36603540	a	a	h	a	b	a	h	a	h	a	h	h	h	h	a	a	h	b	h	h	h	h	a	b	a	a	h	h	b	h	h	h	h	a	h	a	a	a	h	a	h	b	b	h	b	a
Block35068	Chr.4	36790941	36811451	a	a	h	a	b	a	b	a	h	a	h	h	h	h	a	a	h	b	h	h	h	h	a	b	a	h	h	h	b	h	h	h	h	a	h	a	a	a	h	a	h	b	b	h	b	a
Block35069	Chr.4	36832295	36852929	a	a	h	a	b	a	b	a	h	a	h	h	h	h	a	a	h	b	h	h	h	h	a	b	a	h	h	h	b	h	h	h	h	a	h	a	a	a	h	a	h	b	b	h	b	a
Block35071	Chr.4	36868337	36903426	a	a	h	a	b	a	b	a	h	a	h	h	h	h	a	a	h	b	h	h	a	h	a	b	a	a	h	a	b	h	h	h	h	a	b	a	h	a	h	a	h	b	b	h	b	a
Block35128	Chr.4	36930644	37005203	a	a	h	a	b	a	b	a	h	a	h	h	b	b	a	a	h	b	h	h	a	h	a	b	a	a	h	a	b	h	h	h	h	a	b	a	h	a	h	a	h	b	b	h	b	a
Block35130	Chr.4	37006232	37011544	a	a	h	a	b	a	b	a	h	a	h	h	b	b	a	a	h	b	h	h	h	h	a	b	a	h	h	h	b	h	h	h	h	a	b	a	h	a	h	a	h	b	b	h	b	a
Block35136	Chr.4	37017715	37026629	a	a	h	a	b	a	b	a	h	a	h	h	b	b	a	a	h	b	h	h	h	h	a	b	a	h	h	h	b	h	h	h	h	a	b	a	h	a	h	a	h	b	b	h	b	a
Block35137	Chr.4	37026728	37040352	a	a	h	a	b	a	b	a	h	a	h	h	b	b	a	h	h	b	h	h	a	h	a	b	a	h	h	h	b	h	h	h	h	a	b	a	h	a	h	a	h	b	b	a	b	a
Block35171	Chr.4	37062785	37099961	a	a	h	a	b	a	b	a	h	a	h	h	b	b	a	h	h	b	h	h	a	h	a	b	a	h	h	h	b	h	h	h	h	a	b	a	h	a	h	a	a	b	b	a	b	a
Block35172	Chr.4	37127016	37144193	a	a	h	a	b	a	b	a	h	a	h	h	b	b	a	h	h	b	h	h	a	h	a	b	a	h	h	h	b	h	h	h	h	a	b	a	h	a	h	a	a	b	b	a	b	a
Block35174	Chr.4	37147939	37187562	a	a	h	a	b	a	b	a	h	a	h	h	b	b	a	h	a	b	h	h	a	h	a	b	a	h	h	h	b	h	h	h	h	a	b	a	h	a	h	a	a	b	b	a	b	a
Block35175	Chr.4	37194586	37266701	a	a	h	a	b	a	b	a	h	h	h	h	b	h	a	h	a	b	b	h	a	h	a	h	b	h	b	a	h	h	b	h	h	h	h	h	a	b	h	a	h	h	h	a	b	a
Block35502	Chr.4	39787882	39804293	a	h	h	a	b	a	b	a	h	h	h	h	b	a	a	h	a	b	b	h	a	h	a	h	b	h	b	a	h	h	b	h	h	h	h	h	a	b	h	a	h	h	h	a	b	a
Block35505	Chr.4	39830920	39848680	a	h	h	a	b	a	b	a	h	h	h	h	b	a	a	h	a	b	b	h	a	h	a	h	b	h	b	a	h	h	b	h	h	h	h	h	a	b	h	a	h	h	h	a	b	a
Block35506	Chr.4	39858737	39872571	a	h	h	a	b	a	b	a	h	h	h	h	b	a	a	h	a	b	b	h	a	h	a	h	b	h	b	a	h	h	b	h	h	h	h	h	a	b	h	a	h	h	h	a	b	a
Block35519	Chr.4	39901225	39908074	a	h	h	a	b	a	b	a	h	h	h	h	b	a	a	h	a	b	b	h	a	h	a	a	b	h	b	a	h	h	b	h	h	h	h	h	a	b	h	a	h	h	h	a	b	a
Block35538	Chr.4	39940120	39950124	a	a	h	a	b	a	b	a	h	h	h	h	b	h	a	a	a	b	b	h	a	h	a	h	b	a	b	a	a	h	b	h	h	h	h	h	a	b	a	a	h	h	h	a	b	a
Block35604	Chr.4	39987458	40365213	a	h	h	a	b	a	b	b	h	h	b	b	a	h	h	a	h	b	b	b	a	b	h	a	b	a	a	b	h	h	h	h	h	h	h	a	a	h	h	a	a	h	b	h	h	b
Block35682	Chr.5	412267	426455	b	b	h	h	h	a	h	b	h	h	b	b	a	h	h	a	h	b	b	b	a	b	h	a	b	a	a	b	h	h	h	h	h	a	h	a	a	a	h	a	a	h	b	h	h	b
Block35688	Chr.5	435457	447588	b	b	h	h	h	a	h	b	h	h	b	b	a	h	h	a	h	b	b	b	a	b	a	a	b	a	a	b	h	h	h	h	h	h	h	a	a	a	h	h	a	h	b	a	h	b
Block35771	Chr.5	529483	535153	b	b	h	h	h	a	h	b	h	a	b	b	a	h	h	a	h	b	b	b	a	b	h	a	b	a	a	b	h	h	h	h	h	h	h	a	a	h	a	h	a	h	b	a	h	b
Block35782	Chr.5	546079	552922	b	b	h	h	h	a	h	b	h	h	b	b	h	a	h	a	h	b	b	b	h	b	h	a	b	a	a	b	h	h	h	h	b	h	h	a	a	b	h	h	a	h	h	h	h	b
Block36064	Chr.5	1937073	1945432	h	h	h	h	h	a	h	b	h	h	b	b	h	a	h	a	h	b	b	b	h	b	h	a	b	a	a	b	h	h	h	h	b	h	h	a	a	b	h	h	a	h	h	h	h	b
Block36065	Chr.5	1945535	1951805	h	h	h	h	h	a	h	b	h	h	b	b	h	a	h	a	h	b	b	b	h	b	h	a	b	a	a	b	h	h	h	h	b	h	h	a	a	b	h	h	a	h	h	h	h	b
Block36066	Chr.5	1952252	1961150	h	h	h	h	h	a	h	b	h	h	b	b	h	a	h	a	h	b	b	b	h	b	h	a	b	a	a	b	h	h	h	h	b	h	h	a	a	b	h	h	a	h	h	h	h	b
Block36067	Chr.5	1961438	1968659	h	h	h	h	h	a	h	b	h	h	b	b	h	a	h	a	h	b	b	b	h	b	h	a	b	a	a	b	h	h	h	h	b	h	h	a	a	b	h	h	a	h	h	h	h	b
Block36068	Chr.5	1968809	1991754	h	h	h	h	h	a	h	b	b	h	b	b	h	a	h	a	h	b	b	b	h	b	h	a	b	a	a	b	h	h	b	h	b	h	h	a	a	b	h	h	a	h	h	b	h	b
Block36123	Chr.5	2052346	2060591	h	b	h	h	h	a	h	b	b	h	b	b	h	a	h	a	h	b	b	b	h	b	h	a	b	a	a	b	h	h	h	h	b	h	h	a	a	b	h	h	a	h	h	h	h	b
Block36125	Chr.5	2062074	2070240	h	b	h	h	h	a	h	b	h	h	b	b	h	a	h	a	h	b	b	b	h	b	h	a	b	a	a	b	h	h	h	h	b	h	h	a	a	b	h	h	a	h	h	h	h	b
Block36144	Chr.5	2092328	2097374	b	h	h	h	h	a	h	b	h	h	b	b	h	a	h	a	h	b	b	b	h	b	h	a	b	a	a	b	h	h	h	h	b	h	h	a	a	b	h	h	a	h	h	h	h	b
Block36146	Chr.5	2100757	2106782	b	h	h	h	h	a	h	b	h	h	b	b	h	a	h	a	h	b	b	b	h	b	h	a	b	a	a	b	h	h	h	h	b	h	h	a	a	b	h	h	a	h	h	h	h	b
Block36149	Chr.5	2110350	2124695	h	h	h	h	h	a	h	b	h	h	b	b	h	a	h	a	h	b	b	b	h	b	h	a	b	a	a	b	h	h	h	h	b	h	h	a	a	b	h	h	a	h	h	h	h	b
Block36150	Chr.5	2124724	2135283	h	h	h	h	h	a	h	b	h	h	b	b	h	a	h	a	h	b	b	b	h	b	h	a	b	a	a	b	h	h	h	h	b	h	h	a	a	b	h	h	a	h	h	h	h	b
Block36151	Chr.5	2135473	2167160	h	h	h	h	h	a	h	b	h	h	b	b	h	a	h	a	h	b	b	b	h	b	h	a	b	a	a	b	h	h	h	h	b	h	h	a	a	b	h	h	a	h	h	h	h	b
Block36162	Chr.5	2186206	2195054	h	h	h	h	h	a	h	b	h	h	b	b	h	a	h	a	h	b	b	b	h	b	h	a	b	a	a	b	h	h	h	h	b	h	h	a	a	b	h	h	a	h	h	h	h	b
Block36170	Chr.5	2199071	2209757	h	h	h	h	h	a	h	b	h	h	b	b	h	a	h	a	h	b	b	b	h	b	h	a	b	a	a	b	h	h	h	h	b	h	h	a	a	b	h	h	a	h	h	h	h	b
Block36174	Chr.5	2216863	2222487	h	h	h	h	h	a	h	b	h	h	b	b	h	a	h	a	h	b	b	b	h	b	h	a	b	h	a	b	h	h	h	h	b	h	h	a	a	b	h	h	a	h	h	h	h	b
Block36285	Chr.5	2377112	2383050	h	h	h	h	h	a	h	b	h	h	a	a	h	a	h	a	h	b	h	b	h	b	h	b	b	h	b	b	h	h	a	h	b	h	b	h	a	b	h	h	h	h	h	h	h	b
Block36393	Chr.5	3311298	3343038	h	h	h	a	h	a	h	b	h	h	a	a	h	a	h	a	h	b	h	b	h	b	h	b	b	h	b	b	h	h	a	h	b	h	b	h	a	b	h	h	h	h	h	h	h	b
Block36394	Chr.5	3343120	3418941	h	h	h	a	h	a	h	b	h	h	a	a	h	a	h	a	h	b	h	b	h	b	h	b	b	h	b	b	h	h	a	h	b	h	b	h	a	b	h	h	h	h	h	h	h	b
Block36395	Chr.5	3420061	3425245	h	h	h	a	h	a	h	b	h	h	a	a	h	a	h	a	h	b	h	b	h	b	h	b	b	h	b	b	a	h	a	h	b	h	b	h	a	b	h	h	h	h	h	h	h	b
Block36398	Chr.5	3468937	3491979	h	h	h	a	h	a	h	b	h	h	a	a	h	a	b	a	h	b	h	b	h	b	h	h	b	h	b	b	a	h	a	h	b	h	h	h	a	b	h	h	h	h	h	h	h	b
Block36433	Chr.5	3519928	3543507	h	h	h	a	h	a	h	b	h	h	a	a	h	a	b	a	h	b	h	b	h	b	h	h	b	h	b	b	a	h	a	h	b	h	h	h	a	b	h	h	h	h	h	h	h	h
Block36434	Chr.5	3568941	3629688	h	h	h	a	h	a	h	b	h	h	a	a	h	a	h	a	h	b	h	b	h	b	h	h	b	h	b	b	a	h	a	h	b	h	h	h	a	b	h	h	h	h	h	h	h	h
Block36435	Chr.5	3647637	3828581	h	h	h	a	h	a	h	b	h	h	a	a	h	a	h	a	h	b	h	b	h	b	h	h	b	h	b	b	a	h	a	h	b	h	h	h	a	b	h	h	h	h	h	h	h	h
Block36436	Chr.5	3845073	3868357	h	h	h	a	h	a	h	b	h	h	a	a	h	a	h	a	h	b	h	b	h	b	h	h	b	h	b	b	a	h	a	h	b	h	h	h	a	b	h	h	h	h	h	h	h	h
Block36437	Chr.5	3902238	3920348	h	h	h	a	h	a	h	b	h	h	a	a	h	a	h	a	h	b	h	h	h	b	h	h	b	h	b	b	a	h	a	h	b	h	h	h	a	b	h	h	h	h	h	h	h	h
Block36441	Chr.5	3948344	4068346	h	h	h	a	h	a	h	b	h	h	a	a	h	a	h	a	h	b	h	h	h	b	h	h	b	h	b	b	a	h	a	h	b	h	h	h	a	b	h	h	h	h	h	h	h	h
Block36443	Chr.5	4101648	4144796	h	h	h	a	h	a	h	b	h	h	a	a	h	a	h	a	h	b	h	h	h	b	h	h	b	h	b	b	a	h	a	h	b	h	h	h	a	b	h	h	h	h	a	h	a	h
Block36445	Chr.5	4157273	4207744	h	h	h	a	h	a	h	b	h	h	a	a	h	a	h	a	h	b	h	h	h	b	h	h	b	h	b	b	a	h	a	h	b	h	h	h	a	b	h	h	h	h	a	h	a	h
Block36446	Chr.5	4257592	4288393	h	h	h	a	h	a	h	b	h	a	a	a	h	a	h	a	h	b	h	h	h	b	h	h	b	h	b	b	a	h	a	h	b	h	h	h	h	b	h	h	h	b	h	h	a	h
Block36547	Chr.5	4369497	4375179	h	h	h	a	h	a	h	b	h	a	a	a	h	a	h	a	h	b	h	h	h	b	h	h	b	h	b	b	a	h	a	h	b	h	h	h	h	b	h	h	h	b	h	h	a	h
Block36551	Chr.5	4377343	4384627	h	h	h	a	h	a	h	b	h	h	a	a	h	a	h	a	h	b	h	h	b	b	h	h	b	h	b	b	a	h	a	h	b	h	h	h	h	b	h	h	h	b	h	h	a	h
Block36555	Chr.5	4387624	4408887	h	h	h	a	h	a	h	b	h	h	a	a	h	a	h	a	h	b	h	h	b	b	h	h	b	h	b	b	a	h	a	h	b	h	b	h	h	b	a	h	h	b	h	h	a	h
Block36558	Chr.5	4415636	4425115	h	h	h	a	h	a	h	b	h	h	a	a	h	a	h	a	h	b	h	h	h	b	h	h	b	h	b	b	a	h	a	h	b	h	h	h	h	b	a	h	h	b	h	h	a	h
Block36566	Chr.5	4436279	4447408	h	h	h	a	h	a	h	b	h	h	a	a	h	a	h	a	h	b	h	h	h	b	h	h	b	h	b	b	a	h	a	h	b	h	h	h	h	b	a	h	h	b	h	h	a	h
Block36568	Chr.5	4448027	4461251	h	h	h	a	h	a	h	b	h	h	a	a	h	a	h	a	h	b	h	h	h	b	h	h	b	h	b	b	a	h	a	h	b	h	h	h	h	b	a	h	h	b	h	h	a	h
Block36569	Chr.5	4461387	4468290	h	h	h	a	h	a	h	b	h	h	a	a	h	a	h	a	h	b	h	b	h	b	b	h	b	h	b	b	a	h	a	h	b	h	h	h	b	b	a	h	h	b	h	h	a	h
Block36620	Chr.5	4510388	4516082	h	h	b	a	h	a	h	b	h	h	a	a	h	a	b	a	h	b	h	h	b	b	h	h	b	b	b	b	a	h	a	h	b	h	h	h	h	b	a	h	h	b	h	b	a	b
Block36638	Chr.5	4524662	4537082	h	h	b	a	h	a	h	b	h	b	a	a	h	a	h	a	h	b	h	b	b	b	h	h	b	h	b	b	a	h	a	h	b	h	h	h	h	b	a	h	h	b	h	b	a	h
Block36677	Chr.5	4563600	4569744	h	h	h	a	h	a	h	b	h	h	a	a	h	a	h	a	h	h	h	h	h	h	h	h	b	h	b	h	a	h	a	h	b	h	h	h	h	b	a	h	h	h	h	h	a	h
Block36732	Chr.5	4635384	4654493	h	h	h	a	h	a	h	b	h	h	a	a	h	a	h	a	h	b	h	h	h	b	h	h	b	b	b	h	a	h	a	h	b	h	h	h	h	b	a	h	h	b	h	h	a	h
Block36770	Chr.5	5221329	5231639	h	h	h	a	h	a	a	b	h	h	h	h	h	h	h	a	h	b	h	b	h	b	h	h	b	b	b	a	a	h	a	h	b	h	h	h	h	b	a	h	h	b	b	h	a	h
Block36885	Chr.5	6422677	6427826	h	a	h	a	h	a	h	b	h	h	h	h	h	h	h	a	h	b	h	b	b	b	h	h	b	b	b	a	a	h	a	h	b	h	h	h	h	b	a	h	h	b	b	h	a	h
Block37011	Chr.5	6518508	6528923	h	b	h	a	h	a	h	b	h	h	h	h	h	h	h	a	h	b	h	b	h	b	h	h	b	b	b	a	a	h	a	h	b	h	h	h	h	b	a	h	h	b	b	h	a	h
Block37353	Chr.5	6706919	6713663	h	h	h	a	h	a	h	b	h	h	h	h	h	h	h	a	b	b	h	b	h	b	h	h	b	b	b	a	a	h	a	h	b	h	h	h	h	b	a	h	h	b	b	h	a	h
Block37374	Chr.5	6741926	6768266	h	b	h	a	h	a	h	b	h	h	h	h	h	h	h	a	h	b	h	b	h	b	h	h	b	b	b	a	a	h	a	b	b	h	h	h	h	b	a	h	h	b	b	h	a	h
Block37386	Chr.5	6800444	6807048	h	h	h	a	h	a	h	b	h	h	h	h	h	h	h	a	h	b	b	b	h	b	b	h	b	b	b	a	a	b	a	h	b	h	h	h	h	b	a	h	h	b	b	h	a	b
Block37456	Chr.5	6832682	6845708	h	h	h	a	h	a	h	b	b	a	h	h	h	b	b	h	h	b	h	b	h	h	a	h	b	h	b	a	a	h	a	h	h	a	h	h	a	b	a	h	h	h	h	h	a	h
Block37901	Chr.5	8500953	8523805	a	a	h	a	h	a	h	b	b	h	h	h	h	b	b	h	h	b	h	b	h	h	h	h	b	b	b	a	a	h	a	h	b	a	h	h	h	b	a	h	h	b	h	h	a	h
Block38034	Chr.5	8624440	8630603	h	a	h	a	h	a	h	b	b	h	h	h	h	b	b	h	h	b	h	b	h	h	h	h	b	b	b	a	a	h	a	h	b	a	h	h	h	b	a	h	h	b	h	h	a	h
Block38035	Chr.5	8630633	8667266	h	a	h	a	h	a	h	b	b	h	h	h	h	b	b	h	h	b	h	b	h	h	h	h	b	b	b	a	a	h	a	h	b	a	h	h	h	b	a	h	h	b	h	h	a	h
Block38038	Chr.5	8671363	8726902	h	a	h	a	h	a	h	b	b	h	h	h	h	b	b	h	h	b	h	b	h	h	h	h	b	b	b	a	a	h	a	h	b	a	h	h	h	b	a	h	h	b	h	h	a	h
Block38041	Chr.5	8773685	8788711	h	a	h	a	h	a	h	b	b	h	h	h	h	b	b	h	h	b	h	b	h	h	h	h	b	b	b	a	a	h	a	h	b	a	h	h	h	b	a	h	h	b	h	h	a	h
Block38043	Chr.5	8788913	8795468	h	a	h	a	h	a	h	b	b	h	h	h	h	b	b	h	h	b	h	b	h	h	h	h	b	b	b	a	a	h	a	h	b	a	h	h	a	b	a	h	h	b	h	h	a	h
Block38059	Chr.5	8841800	9032986	h	a	h	a	h	a	h	b	b	h	h	h	h	b	b	a	h	b	h	b	h	h	h	h	b	b	b	a	a	h	a	h	b	a	h	h	h	b	a	h	h	b	h	h	a	h
Block38061	Chr.5	9034557	9042241	h	a	h	a	h	a	h	b	b	h	h	h	h	b	b	h	h	b	h	b	h	h	h	h	b	b	b	a	a	h	a	h	b	a	h	h	h	b	a	h	h	b	h	h	a	h
Block38062	Chr.5	9042419	9073135	h	a	h	a	h	a	h	b	b	h	h	h	h	b	b	h	h	b	h	b	h	h	h	h	b	b	b	a	a	h	a	a	b	a	h	h	h	b	a	h	h	b	h	h	a	h
Block38064	Chr.5	9074870	9080929	h	a	h	a	h	a	h	b	b	h	h	h	h	b	b	h	h	b	h	b	h	h	h	h	b	b	b	a	a	h	a	h	b	a	h	h	h	b	a	h	h	b	h	h	a	h
Block38066	Chr.5	9082049	9098650	h	a	h	a	h	a	h	b	b	h	h	h	h	h	b	h	h	b	h	b	h	h	h	h	b	h	b	a	a	h	a	h	b	a	h	h	h	b	a	h	h	b	h	h	a	h
Block38082	Chr.5	9272229	9277439	h	a	h	h	h	h	h	b	b	h	h	h	h	h	b	h	h	b	h	b	h	h	h	h	b	h	b	a	a	h	a	h	b	a	h	h	h	b	a	h	h	b	h	h	a	h
Block38095	Chr.5	9305503	9347271	h	a	h	h	h	h	h	b	b	h	h	h	h	h	b	h	h	b	h	b	h	h	h	h	b	h	b	a	a	h	a	h	b	a	h	h	h	b	a	b	h	b	h	h	a	h
Block38097	Chr.5	9349017	9368797	h	a	h	h	h	h	h	b	b	h	h	h	h	h	b	h	h	b	h	b	h	h	h	h	b	h	b	a	a	h	a	h	b	a	h	h	h	b	a	h	h	b	h	h	a	h
Block38098	Chr.5	9368991	9376037	h	a	h	h	h	h	h	b	b	h	h	h	h	h	b	h	h	b	h	b	h	h	h	h	b	h	b	a	a	h	a	h	b	a	h	h	h	b	a	h	h	b	h	h	a	h
Block38181	Chr.5	9451809	9478366	h	a	h	h	h	h	h	b	b	h	h	h	h	h	b	h	h	b	h	b	h	h	h	h	b	h	b	a	a	h	a	h	b	a	h	h	h	b	a	h	h	b	h	h	a	h
Block38184	Chr.5	9480007	9490201	h	a	h	h	h	h	h	b	b	h	h	h	h	h	b	h	h	b	h	b	h	h	h	h	b	h	b	a	a	h	a	h	b	a	h	h	h	b	a	h	h	b	h	h	a	h
Block38192	Chr.5	9498707	9518837	h	a	h	h	h	h	h	b	b	h	h	h	h	h	b	h	h	b	h	b	h	h	h	h	b	h	b	a	a	h	a	h	b	a	h	h	h	b	a	h	h	b	h	h	a	h
Block38193	Chr.5	9518953	9525346	h	a	h	h	h	h	h	b	b	h	h	h	h	h	b	h	h	b	h	b	h	h	h	h	b	h	b	a	a	h	a	h	b	a	h	h	h	b	a	h	h	b	h	h	a	h
Block38194	Chr.5	9525386	9548017	h	a	h	h	h	h	h	b	b	h	h	h	h	h	b	h	h	b	h	b	h	h	h	h	b	h	b	a	a	h	a	h	b	a	h	h	h	b	a	h	h	b	h	h	a	h
Block38196	Chr.5	9549575	9559502	h	a	h	h	h	h	h	b	b	h	h	h	h	h	b	h	h	b	h	b	h	h	h	h	b	h	b	a	a	h	a	h	b	a	h	h	h	b	a	h	h	b	h	h	a	h
Block38198	Chr.5	9561743	9574934	h	a	h	h	h	h	h	b	b	h	h	h	h	h	b	h	h	b	h	b	h	h	h	h	b	h	b	a	a	h	a	h	b	a	h	h	h	b	a	h	h	b	h	h	a	h
Block38200	Chr.5	9576525	9590155	h	a	h	h	h	h	h	b	b	h	h	h	h	h	b	h	h	b	h	b	h	h	h	h	b	h	b	a	a	h	a	h	b	a	h	h	h	b	a	h	h	b	h	h	a	h
Block38201	Chr.5	9590743	9615443	h	a	h	h	h	h	h	b	b	h	h	h	h	h	b	h	h	b	h	b	h	h	h	h	b	h	b	a	a	h	a	h	b	a	h	h	h	b	a	h	h	b	h	h	a	h
Block38204	Chr.5	9620404	9633731	h	a	h	h	h	h	h	b	b	h	h	h	h	h	b	h	h	b	h	b	h	h	h	h	b	h	b	a	a	h	a	h	b	a	h	h	h	b	a	h	h	b	h	h	a	h
Block38206	Chr.5	9634214	9639531	h	a	h	h	h	h	h	b	b	h	h	h	h	h	b	h	h	b	h	b	h	h	h	h	b	h	b	a	a	h	a	h	b	a	h	h	h	b	a	h	h	b	h	h	a	h
Block38208	Chr.5	9643149	9649721	h	a	h	h	h	h	h	b	b	h	h	h	h	h	b	h	h	b	h	b	h	h	h	a	b	h	b	a	a	a	a	a	b	a	a	h	h	b	a	h	h	b	h	h	a	h
Block38215	Chr.5	9658130	9663356	h	a	h	h	h	h	h	b	b	h	h	h	h	h	b	h	h	b	h	b	h	h	a	h	b	h	b	a	a	h	a	h	b	a	h	h	h	b	a	h	h	b	h	h	a	h
Block38252	Chr.5	9688281	9694251	a	a	h	h	h	h	h	b	b	a	h	h	h	h	b	h	h	b	h	b	h	h	h	h	b	h	b	a	a	h	a	h	b	a	h	h	h	b	a	h	h	b	h	h	a	a
Block38314	Chr.5	9727105	9738510	h	a	h	h	h	h	h	b	b	h	h	h	h	h	b	h	h	b	h	b	h	h	h	h	b	h	b	a	a	h	a	h	b	a	h	h	h	b	a	h	h	b	h	h	a	h
Block38320	Chr.5	9746400	9755362	h	a	h	h	h	h	h	b	b	h	h	h	h	h	b	a	h	b	h	b	h	h	h	h	b	h	b	a	a	h	a	h	b	a	h	h	a	b	a	a	h	b	h	h	a	a
Block38331	Chr.5	9767747	9773954	h	a	h	h	h	h	h	b	b	h	h	h	h	a	b	a	h	b	h	b	h	h	a	h	b	h	b	a	a	h	a	h	b	a	a	h	h	b	a	h	h	b	h	h	a	h
Block38356	Chr.5	9783207	9790865	h	a	h	h	h	h	h	b	b	h	h	a	h	h	b	h	h	b	h	h	h	h	h	h	b	h	b	a	a	h	a	h	b	a	h	h	a	b	a	h	h	b	h	h	a	h
Block38434	Chr.5	9860103	9866099	h	a	h	h	h	h	a	b	b	h	h	h	h	h	b	h	h	b	h	h	h	h	h	h	b	h	b	a	a	a	a	h	b	a	h	h	h	b	a	h	h	b	h	h	a	h
Block38448	Chr.5	9875825	9882394	a	a	h	h	h	h	h	b	b	h	h	h	h	h	b	h	h	b	h	h	h	h	h	h	b	h	b	a	a	a	a	h	b	a	h	h	h	b	a	h	h	b	h	h	a	h
Block38449	Chr.5	9882665	9888078	a	a	h	h	h	h	h	b	b	h	h	h	h	h	b	h	h	b	h	h	h	h	h	h	b	h	b	a	a	h	a	h	b	a	h	h	h	b	a	h	h	b	a	h	a	h
Block38454	Chr.5	9891298	9898533	a	a	h	h	h	h	h	b	b	h	h	h	h	h	b	h	h	b	h	h	h	h	h	h	b	h	b	a	a	h	a	h	b	a	h	h	h	b	a	h	h	b	h	h	a	h
Block38458	Chr.5	9902363	9907996	h	a	h	h	h	h	h	b	b	h	h	h	h	h	b	h	h	b	h	h	h	h	h	h	b	h	b	a	a	h	a	h	b	a	h	h	h	b	a	h	h	b	h	h	a	h
Block38460	Chr.5	9908632	9920635	h	a	h	h	h	h	h	b	b	b	h	h	h	h	b	h	h	b	h	h	h	h	b	h	b	h	b	a	a	h	a	h	b	a	h	h	h	b	a	h	h	b	h	h	a	h
Block38464	Chr.5	9924286	9932393	h	a	h	h	h	h	h	b	b	h	h	h	h	h	b	h	h	b	h	h	h	h	h	h	b	h	b	a	a	h	a	h	h	a	h	h	h	b	a	h	h	b	h	h	a	h
Block38500	Chr.5	9989759	9997375	h	a	h	h	h	h	h	b	b	h	h	h	h	h	b	h	h	b	h	h	h	h	h	h	b	h	b	a	a	h	a	h	h	a	h	h	h	b	a	h	h	b	h	h	a	h
Block38502	Chr.5	10035736	10118163	h	a	h	h	h	h	h	b	b	h	h	h	h	h	b	h	h	b	h	h	h	h	h	h	b	h	b	a	a	h	a	h	h	a	h	h	h	b	a	h	h	b	h	h	a	h
Block38503	Chr.5	10125542	10133919	h	a	h	b	h	h	h	b	b	h	h	h	h	h	b	h	h	b	h	h	h	h	h	h	b	h	b	a	a	h	a	h	h	a	h	h	h	b	a	h	h	b	h	h	a	h
Block38504	Chr.5	10142282	10171936	h	a	h	b	h	h	h	b	b	h	h	h	h	h	b	h	h	b	h	h	h	h	h	h	b	h	b	a	a	h	a	h	h	a	h	h	h	b	a	h	h	b	h	h	a	h
Block38507	Chr.5	10204668	10260507	h	a	h	b	h	h	h	b	b	h	h	h	h	h	b	h	h	b	h	h	h	h	h	h	b	h	b	a	a	h	a	h	h	a	h	h	h	b	a	h	h	b	h	h	a	h
Block38509	Chr.5	10314476	10333096	h	a	h	b	h	h	h	b	b	h	h	h	h	h	b	h	h	b	h	h	h	h	h	h	b	a	b	a	a	h	a	h	h	a	h	h	h	b	a	h	h	b	h	h	a	h
Block38512	Chr.5	10429190	10615563	h	a	h	b	h	h	h	b	b	h	h	h	h	h	b	h	h	b	h	h	h	h	h	h	b	a	b	a	a	h	a	h	h	a	h	h	h	b	a	h	h	b	h	h	a	h
Block38513	Chr.5	10652210	10673171	h	a	h	b	h	h	h	b	b	h	h	h	h	h	b	h	h	b	h	h	h	h	h	h	b	a	b	a	a	h	a	h	h	a	h	h	h	b	a	h	h	b	h	h	a	h
Block38514	Chr.5	10708503	10814004	h	a	h	b	h	h	h	b	b	h	h	h	h	h	b	h	h	b	h	h	h	h	h	h	b	a	b	a	a	h	a	h	h	a	h	h	h	h	a	h	h	b	h	h	a	h
Block38517	Chr.5	10886791	11027502	h	a	h	b	h	h	h	b	b	h	h	h	h	h	b	h	h	b	h	h	h	h	h	h	b	a	b	a	a	h	a	h	h	a	h	h	h	h	h	h	h	b	h	h	a	h
Block38522	Chr.5	11137249	11142744	h	a	h	b	h	h	h	b	b	h	h	h	h	h	b	h	h	b	h	h	h	h	h	h	b	a	b	a	a	h	a	h	h	a	h	h	h	h	h	h	h	b	h	h	a	h
Block38524	Chr.5	11155309	11195580	h	a	h	b	h	h	h	b	b	h	h	h	h	h	b	h	h	b	h	h	h	h	h	h	b	a	b	a	a	h	a	h	h	a	h	h	h	h	h	h	h	b	h	h	a	h
Block38527	Chr.5	11289750	11306597	h	a	h	b	h	h	h	b	b	h	h	h	h	h	b	h	h	b	h	h	h	h	h	h	b	a	b	a	a	h	h	h	h	a	h	h	h	h	h	h	h	b	h	h	a	h
Block38529	Chr.5	11311160	11404436	h	a	h	b	a	h	h	b	b	h	h	h	h	h	b	h	h	b	h	h	h	h	h	h	b	a	b	a	a	h	h	h	h	a	h	h	h	h	h	h	h	b	h	h	a	h
Block38530	Chr.5	11404501	11740688	h	a	h	b	a	h	h	b	b	h	h	h	h	h	b	h	h	b	h	h	h	h	h	h	b	a	b	a	a	h	h	h	h	a	h	h	h	h	h	h	h	h	h	h	a	h
Block38531	Chr.5	11743519	11780585	h	a	h	b	a	h	h	b	b	h	h	h	h	h	b	h	h	b	h	h	h	h	h	h	b	a	b	a	a	h	h	h	h	a	h	h	h	h	h	h	h	h	h	h	a	h
Block38532	Chr.5	11789906	11805651	h	a	h	b	a	h	h	b	b	h	h	h	h	h	b	h	h	b	h	h	h	h	h	h	b	a	b	a	a	h	h	h	h	a	h	h	h	h	h	h	h	h	h	h	a	h
Block38533	Chr.5	11805816	11837787	h	a	h	b	a	h	h	b	b	h	h	h	h	h	b	h	h	b	h	h	h	h	h	h	b	a	b	a	a	h	h	h	h	a	h	h	h	h	h	h	h	h	h	h	a	h
Block38534	Chr.5	11838932	11940446	h	a	h	b	a	h	h	b	b	h	h	h	h	h	b	h	b	b	h	h	h	h	h	h	b	a	b	a	a	h	h	h	h	a	h	h	h	h	h	b	h	h	h	h	a	h
Block38536	Chr.5	11947840	11959334	h	a	h	b	a	h	h	b	b	h	h	h	h	h	b	h	b	b	h	h	h	h	h	h	b	a	b	h	a	h	h	h	h	a	h	h	h	h	h	b	h	h	h	h	a	h
Block38539	Chr.5	11978412	11986617	h	a	h	b	a	h	h	b	b	h	h	h	h	h	b	h	b	b	h	h	h	h	h	h	b	a	b	h	a	h	h	h	h	a	h	h	h	h	h	b	h	h	h	h	a	h
Block38540	Chr.5	12017273	12067774	h	a	h	b	a	h	h	b	b	h	h	h	h	h	b	h	b	b	h	h	h	h	h	h	b	a	b	h	a	b	h	h	h	a	h	h	h	h	h	b	h	h	h	h	a	h
Block38541	Chr.5	12085276	12180275	h	a	h	b	a	h	h	b	b	h	a	h	h	h	b	h	b	b	h	h	h	h	h	h	b	a	b	h	a	b	h	h	h	a	h	h	h	h	h	b	h	h	h	h	a	h
Block38542	Chr.5	12202292	12211275	h	a	h	b	a	h	h	b	b	h	a	a	h	h	b	h	b	b	h	h	h	h	h	h	b	a	b	h	a	b	h	h	h	a	h	h	h	h	h	b	h	h	h	h	a	h
Block38543	Chr.5	12212610	12328263	h	a	h	b	a	h	h	b	b	h	a	a	h	h	b	h	b	b	h	a	h	h	h	h	b	a	b	h	a	b	h	h	h	a	h	h	h	h	h	b	h	h	h	h	a	h
Block38545	Chr.5	12349358	12423686	h	a	h	b	a	h	h	b	h	h	a	a	b	b	b	a	h	h	a	h	h	h	b	b	b	a	a	h	h	h	h	b	a	h	b	h	h	b	h	h	h	h	h	h	a	b
Block39251	Chr.5	26572253	26581598	h	a	a	b	h	b	h	b	h	h	a	a	b	b	b	a	h	h	a	h	h	h	b	b	b	a	a	h	h	h	h	b	a	h	b	h	h	h	h	h	h	h	h	h	a	b
Block39286	Chr.5	26606840	26617160	h	a	a	b	h	b	h	b	h	h	a	a	b	b	b	a	h	h	a	h	h	h	b	b	b	a	a	h	h	h	h	b	a	b	b	h	h	h	h	h	h	h	h	h	a	b
Block39291	Chr.5	26619276	26626490	h	a	a	b	h	b	h	b	h	h	a	a	b	b	b	a	h	h	a	b	h	h	b	b	b	a	a	h	b	h	h	b	a	h	b	h	h	h	h	h	h	b	h	h	a	b
Block39302	Chr.5	26638292	26644858	h	a	a	b	h	b	h	b	h	h	a	a	b	b	b	a	h	h	a	b	h	h	b	b	b	a	a	h	h	h	h	b	a	h	b	h	h	h	h	h	h	b	h	h	a	b
Block39307	Chr.5	26649051	26659841	h	a	a	b	h	b	h	b	h	h	a	a	b	b	b	a	h	h	a	h	h	h	b	b	b	a	a	h	h	h	h	b	a	h	b	h	b	h	h	h	h	h	h	h	a	b
Block39442	Chr.5	26727801	26734888	h	a	a	b	h	b	h	b	h	h	a	a	b	b	b	a	h	h	a	h	h	h	b	b	b	a	a	h	h	h	h	b	a	h	b	h	h	h	h	h	h	h	h	h	a	b
Block39497	Chr.5	26782694	26798298	h	a	a	b	h	b	h	b	h	h	a	a	b	b	b	a	h	h	a	h	h	h	b	b	b	a	a	h	h	h	h	b	a	h	b	h	h	h	h	h	h	h	h	b	a	b
Block39499	Chr.5	26798394	26807693	h	a	a	b	h	b	h	b	h	h	a	a	b	b	b	a	h	h	a	h	h	h	b	b	b	a	a	h	h	h	h	b	a	h	b	h	h	h	h	h	h	h	h	h	a	b
Block39522	Chr.5	26874122	26919814	h	a	a	b	h	b	h	b	h	h	a	a	b	b	b	a	h	h	a	h	h	h	b	b	b	a	a	h	h	h	h	b	a	h	b	h	h	h	h	h	h	h	h	h	a	b
Block39523	Chr.5	26921381	27070651	h	a	a	b	h	b	h	b	h	h	a	a	b	b	b	a	h	h	a	h	h	h	b	b	b	a	a	h	h	h	h	b	a	h	b	h	h	h	h	h	h	h	h	h	a	b
Block39525	Chr.5	27091030	27114261	h	a	a	b	h	b	h	b	h	h	a	a	b	b	b	a	h	h	a	h	h	h	b	b	b	a	a	h	h	h	h	b	a	h	b	h	h	h	h	h	h	h	h	h	a	b
Block39526	Chr.5	27128907	27223813	h	a	a	b	h	b	h	b	h	h	a	a	b	b	b	a	h	h	a	h	h	h	b	h	b	a	a	h	h	h	h	b	a	h	b	h	h	h	h	h	h	h	h	h	a	b
Block39534	Chr.5	27300353	27363161	h	a	a	b	h	b	h	b	h	h	a	a	b	b	b	a	h	h	a	h	h	h	b	h	b	a	a	h	h	h	h	b	a	h	b	h	h	h	h	h	h	h	h	h	a	b
Block39535	Chr.5	27363733	27443132	h	a	a	b	h	b	h	b	h	h	a	a	b	b	b	a	h	h	a	h	h	h	b	h	b	a	a	h	h	h	h	b	a	h	b	h	h	h	h	h	h	h	h	h	a	b
Block39536	Chr.5	27446219	27477747	h	a	a	b	h	b	h	b	h	h	a	a	b	b	b	a	h	h	a	h	h	h	b	h	b	a	a	h	h	h	h	b	a	h	b	h	h	h	h	h	h	h	h	h	a	b
Block39538	Chr.5	27493255	27550352	h	a	a	b	h	b	h	b	h	h	a	a	b	b	b	a	h	h	a	h	h	h	b	h	b	a	a	h	h	h	h	b	a	h	b	h	h	h	h	h	h	h	h	h	a	b
Block39539	Chr.5	27554713	27642774	h	a	a	b	h	b	h	b	h	h	a	a	b	b	b	a	h	h	a	h	h	h	b	h	b	a	a	h	h	h	h	h	a	h	b	h	h	h	h	h	h	h	h	h	a	b
Block39540	Chr.5	27648345	27815395	h	a	a	b	h	b	h	b	h	h	a	a	b	b	b	a	h	h	a	h	h	h	b	h	b	a	a	h	h	h	h	h	a	h	b	h	h	h	h	h	h	h	h	h	a	b
Block39541	Chr.5	27825114	27833353	h	a	a	b	h	b	h	b	h	h	a	a	b	b	b	a	h	h	a	h	h	h	b	h	b	a	a	h	h	h	h	h	a	h	b	h	h	h	h	h	h	h	h	h	a	b
Block39542	Chr.5	27840322	27882264	h	a	a	b	h	b	h	b	h	h	a	a	b	b	b	a	h	h	a	h	h	h	b	h	b	a	a	h	h	h	h	h	a	h	b	h	h	h	h	h	h	h	h	h	a	b
Block39543	Chr.5	27887593	27987382	h	a	a	b	h	b	h	b	h	h	a	a	b	b	b	a	h	h	a	h	h	h	b	h	b	a	a	h	h	h	h	h	a	h	b	h	h	h	h	h	h	h	h	h	a	b
Block39545	Chr.5	27997903	28138599	h	a	a	b	h	b	h	b	h	h	a	a	b	b	b	a	h	h	a	h	h	h	b	h	b	a	a	h	h	h	h	h	a	h	b	h	b	h	h	h	h	h	h	h	a	b
Block39547	Chr.5	28154878	28242040	h	a	a	b	h	b	h	b	h	h	a	a	b	b	b	a	h	h	a	h	h	h	b	h	b	a	a	h	h	h	h	h	a	h	b	h	b	h	h	h	h	h	h	h	a	b
Block39551	Chr.5	28308895	28316590	h	a	a	b	h	b	h	b	h	h	a	a	b	b	b	a	h	h	a	h	h	h	b	h	b	a	a	h	h	h	h	h	a	h	b	h	b	h	h	h	h	h	h	h	a	b
Block39553	Chr.5	28333552	28690733	h	a	a	b	h	b	h	b	h	h	a	a	b	b	b	a	h	h	a	h	h	h	b	h	b	a	a	h	h	h	h	h	h	h	b	h	b	h	h	h	h	h	h	h	a	b
Block39555	Chr.5	28714783	28723937	h	a	a	b	h	b	h	b	h	h	a	a	b	b	b	a	h	h	h	h	h	h	b	h	b	a	a	h	h	h	h	h	h	h	b	h	b	h	h	h	h	h	h	h	a	b
Block39556	Chr.5	28724568	28846531	h	a	a	b	h	b	h	b	h	h	a	a	b	b	b	a	h	h	h	h	h	h	b	h	b	a	a	h	h	h	h	h	h	h	b	h	h	h	h	h	h	h	h	h	a	b
Block39557	Chr.5	28850750	28871835	h	a	a	b	h	b	h	b	h	h	a	a	b	b	b	a	h	h	h	h	h	h	b	h	b	a	a	h	h	h	h	h	h	h	b	h	h	h	h	h	h	h	h	h	a	b
Block39558	Chr.5	28890826	28979194	h	a	a	b	h	b	h	b	h	h	a	a	b	b	b	a	h	h	h	h	h	h	b	h	b	a	a	h	h	h	h	h	h	h	b	h	h	h	h	h	h	h	h	h	a	b
Block39559	Chr.5	28986720	29001485	h	a	a	b	h	b	h	b	h	h	a	a	b	b	b	a	h	h	h	h	a	h	b	h	b	a	a	h	h	h	h	h	h	h	b	h	h	h	h	h	h	h	h	h	a	b
Block39564	Chr.5	29005794	29014679	h	a	a	b	h	b	h	b	h	h	a	a	b	b	b	a	h	h	h	h	a	h	b	h	b	a	a	h	h	h	h	a	a	a	b	h	a	h	a	h	h	h	h	h	a	b
Block39571	Chr.5	29016650	29022064	h	a	a	b	h	b	h	b	h	h	a	a	b	b	b	a	h	h	h	h	a	h	b	h	b	a	a	h	h	h	h	h	h	h	h	h	h	h	h	h	h	h	h	h	a	b
Block39600	Chr.5	29035811	29103764	h	a	a	b	h	b	h	b	h	h	a	a	b	b	b	a	h	h	h	h	a	h	b	h	b	a	a	h	h	h	h	h	h	h	h	h	h	h	h	h	h	h	h	h	a	b
Block39601	Chr.5	29134229	29171039	h	a	a	b	h	b	h	b	h	h	a	a	b	b	b	a	h	h	h	h	a	h	b	h	b	a	a	h	h	h	h	h	h	h	h	h	h	h	h	h	h	h	h	h	a	b
Block39604	Chr.5	29187929	29192948	h	a	a	b	h	b	h	b	h	h	a	a	b	b	b	a	h	h	h	h	a	h	b	h	b	a	a	h	h	h	h	h	h	h	h	h	h	h	h	h	h	h	h	h	a	b
Block39607	Chr.5	29197413	29207790	h	a	a	b	h	b	h	b	h	h	a	a	b	b	b	a	h	h	h	h	a	h	b	h	b	a	a	h	h	h	h	h	h	h	h	h	h	h	h	h	h	h	h	h	a	b
Block39608	Chr.5	29211654	29322555	h	a	a	b	h	b	h	b	h	h	a	a	b	b	b	a	h	h	h	h	a	h	b	h	b	a	a	h	h	h	h	h	h	h	h	h	h	h	h	h	h	h	h	h	a	b
Block39609	Chr.5	29323998	29333829	h	a	a	b	h	h	h	b	h	h	a	a	b	b	b	a	h	h	h	h	a	h	b	h	b	a	a	h	h	h	h	h	h	h	h	h	h	h	h	h	h	h	h	h	h	b
Block39610	Chr.5	29339565	30117758	h	a	a	b	h	h	h	b	h	h	a	a	b	b	b	a	h	h	h	h	a	h	b	h	b	a	a	h	h	h	h	h	h	h	h	h	h	h	h	h	h	h	h	h	h	b
Block39611	Chr.5	30232288	30465637	h	a	a	b	h	h	h	b	h	h	a	a	b	b	b	a	h	h	h	h	a	h	b	h	b	a	a	h	h	h	h	h	h	h	h	h	h	h	h	h	h	h	h	h	h	b
Block39614	Chr.5	30470003	30481180	h	a	a	b	h	h	h	b	h	h	a	a	b	b	b	a	h	h	h	h	a	h	b	h	b	a	a	h	h	h	h	h	h	h	h	h	h	h	h	h	h	h	h	h	h	b
Block39638	Chr.5	30499890	30591267	h	a	a	b	h	h	h	b	h	h	a	a	b	b	b	a	h	h	h	h	a	h	b	h	b	a	a	h	h	h	h	h	h	h	h	h	h	h	h	h	h	h	h	h	h	b
Block39639	Chr.5	30593588	30695085	h	a	a	b	h	h	a	b	h	h	a	a	b	b	b	a	h	h	a	h	a	h	b	h	b	a	a	a	b	h	h	h	h	a	h	h	h	h	h	h	h	h	h	h	a	b
Block39658	Chr.5	30705214	30711181	h	a	a	b	h	h	h	b	h	h	a	a	b	b	b	a	h	h	h	h	a	h	b	h	b	a	a	h	b	a	h	h	h	h	a	h	h	h	h	h	h	h	h	a	h	b
Block39732	Chr.5	30757222	30769677	h	a	a	b	h	h	h	b	h	h	a	a	b	b	b	a	h	h	h	h	a	h	b	h	b	a	a	h	b	h	h	h	h	h	a	h	h	h	h	h	h	h	h	a	h	b
Block39779	Chr.5	30794863	30802975	h	a	a	b	h	h	h	b	h	h	a	a	b	b	b	a	h	h	h	a	a	h	b	h	b	a	a	h	b	h	h	h	h	h	h	h	h	h	h	h	h	h	h	a	h	b
Block39805	Chr.5	30827661	30836339	h	a	a	b	h	h	a	b	h	h	a	a	b	b	b	a	h	h	h	h	a	h	b	h	b	a	a	h	b	h	a	h	h	h	h	h	h	a	h	h	h	h	h	h	a	b
Block39819	Chr.5	30844445	30851547	h	a	a	b	h	h	h	b	h	h	a	a	b	b	b	a	h	h	h	h	a	h	b	h	b	a	a	h	b	h	a	h	h	h	h	h	h	h	h	h	h	h	a	a	a	b
Block39826	Chr.5	30858602	30864375	h	a	a	b	h	h	h	b	h	h	a	a	b	b	b	a	h	h	h	h	a	h	b	h	b	a	a	h	b	h	h	h	h	h	h	h	h	h	h	h	h	h	a	a	a	b
Block39828	Chr.5	30864518	30878892	h	a	a	b	h	h	h	b	h	h	a	a	b	b	b	a	h	h	h	h	a	h	b	h	b	a	a	h	b	h	h	h	h	a	h	h	h	h	h	h	h	h	h	a	h	b
Block39836	Chr.5	30887150	30895030	h	a	a	b	h	h	h	b	h	h	a	a	b	b	b	a	h	h	h	h	a	h	b	h	b	a	a	h	b	h	h	h	h	a	h	h	h	h	h	h	h	h	h	a	h	b
Block39837	Chr.5	30896253	30906264	h	a	a	b	h	h	h	b	h	h	a	a	b	b	b	a	a	h	h	h	a	h	b	h	b	a	a	h	b	h	h	h	h	h	h	h	h	h	h	h	h	h	h	a	h	b
Block39866	Chr.5	30933606	30940169	h	a	a	b	h	h	h	b	h	h	a	a	b	b	b	a	a	h	h	h	a	h	b	h	b	a	a	h	b	h	h	h	h	h	h	h	h	h	h	h	h	h	h	a	h	b
Block39867	Chr.5	30941335	30948021	h	a	a	b	h	a	h	b	h	a	a	a	b	b	b	a	h	h	h	h	a	h	b	h	b	a	a	h	b	a	a	a	h	h	h	h	h	h	h	h	h	h	h	a	h	b
Block39891	Chr.5	30981224	30987769	h	a	a	b	h	h	h	b	h	h	a	a	b	b	b	a	h	h	h	h	a	h	b	h	b	a	a	h	b	h	h	h	h	h	h	h	h	h	h	h	h	h	h	a	h	b
Block39902	Chr.5	30999971	31024908	h	a	a	b	h	h	h	b	h	h	a	a	b	b	b	a	h	h	h	h	a	h	b	h	b	a	a	h	b	h	h	h	h	h	h	h	a	h	h	h	h	h	h	a	h	b
Block39905	Chr.5	31025381	31037878	h	a	a	b	h	h	h	b	a	h	a	a	b	b	b	a	h	h	h	h	a	h	b	h	b	a	a	h	b	h	h	h	h	h	h	h	h	h	h	h	h	h	h	a	h	b
Block39915	Chr.5	31056297	31076244	a	a	a	b	h	h	h	b	h	a	a	a	b	b	b	a	h	h	h	h	a	h	b	h	b	a	a	h	b	h	h	h	h	h	h	h	h	h	h	a	h	h	h	a	a	b
Block39941	Chr.5	31092288	31105317	h	a	a	b	h	h	h	b	h	h	a	a	b	b	b	a	h	h	h	h	a	h	b	h	b	a	a	h	b	h	h	h	h	h	h	h	a	h	a	h	h	h	h	a	a	b
Block39980	Chr.5	31116917	31138507	h	a	a	b	h	h	h	b	h	h	a	a	b	b	b	a	h	h	h	h	a	h	b	h	b	a	a	a	b	h	h	h	h	a	h	h	h	h	h	h	h	h	h	a	h	b
Block40088	Chr.5	31185875	31191606	h	a	a	b	h	h	h	b	h	h	a	a	b	b	b	a	h	h	h	h	a	h	b	h	b	a	a	a	b	h	h	h	h	a	h	h	h	h	h	h	h	a	h	a	h	b
Block40099	Chr.5	31197593	31211657	h	a	a	b	h	h	h	b	h	h	a	a	b	b	b	a	h	h	h	h	a	h	b	h	b	a	a	h	b	h	h	h	h	a	a	h	h	h	h	h	h	h	h	a	h	b
Block40106	Chr.5	31217014	31224021	h	a	a	b	h	h	h	b	h	h	a	a	b	b	b	a	h	h	h	h	a	h	b	h	b	a	a	h	b	h	h	h	h	h	a	h	h	h	h	h	h	a	h	a	h	b
Block40167	Chr.5	31310094	31316639	a	a	a	b	h	h	h	b	h	h	a	a	b	b	b	a	h	h	h	h	a	h	b	h	b	a	a	h	b	h	h	h	h	h	h	h	h	h	h	h	h	h	h	a	h	b
Block40234	Chr.5	31360031	31366293	h	a	a	b	h	h	h	b	a	h	a	a	b	b	b	a	h	h	h	h	a	h	b	h	b	a	a	h	b	a	h	h	h	a	h	h	h	h	h	h	h	h	h	a	h	b
Block40253	Chr.5	31380525	31388551	h	a	a	b	h	h	h	b	a	h	a	a	b	b	b	a	h	h	h	h	a	h	b	h	b	a	a	h	b	a	h	h	h	a	h	h	h	h	h	h	h	h	h	a	h	b
Block40254	Chr.5	31388683	31398465	h	a	a	b	h	h	h	b	a	h	a	a	b	b	b	a	h	a	h	h	a	h	b	h	b	a	a	h	b	h	h	h	h	h	h	h	h	h	h	h	h	h	h	a	h	b
Block40261	Chr.5	31406525	31418270	h	a	a	b	h	h	h	b	h	h	a	a	b	b	b	a	h	a	h	h	a	h	b	h	b	a	a	h	b	h	h	h	h	h	a	h	h	h	a	a	h	a	a	a	h	b
Block40298	Chr.5	31448281	31454482	a	a	a	b	h	h	a	b	h	h	a	a	b	b	b	a	h	a	h	h	a	h	b	h	b	a	a	h	b	h	h	h	a	h	a	h	h	h	a	a	h	h	h	a	a	b
Block40322	Chr.5	31466861	31479558	h	a	a	b	h	h	h	b	h	h	a	a	b	b	b	a	h	a	a	h	a	h	b	h	b	a	a	h	b	h	h	h	h	h	h	a	h	h	h	a	h	h	h	a	h	b
Block40522	Chr.5	31572635	31582529	h	a	a	b	h	h	h	b	h	h	a	a	b	b	b	a	h	a	a	h	a	h	b	h	b	a	a	h	b	h	h	h	h	h	h	a	h	h	h	a	h	h	h	a	h	b
Block40523	Chr.5	31582706	31590694	h	a	a	b	h	h	h	b	h	h	a	a	b	b	b	a	h	a	h	h	a	h	b	h	b	a	a	h	b	h	h	a	h	h	h	h	a	h	h	a	h	h	a	a	h	b
Block40538	Chr.5	31602982	31617170	h	a	a	b	h	h	h	b	h	h	a	a	b	b	b	a	h	a	h	h	a	h	b	h	b	a	a	a	b	h	h	a	h	h	h	h	a	h	h	a	h	h	a	a	h	b
Block40539	Chr.5	31617318	31623095	h	a	a	b	h	h	h	b	h	h	a	a	b	b	b	a	h	h	a	h	h	h	b	b	b	a	a	h	b	h	h	b	a	h	b	h	h	h	h	b	h	h	h	h	a	b
Block40790	Chr.5	32249973	32255206	h	a	a	b	h	b	h	b	h	h	a	a	b	b	b	a	h	h	h	h	h	h	b	h	b	a	a	h	b	h	h	h	a	h	b	h	h	h	h	a	h	h	h	h	a	b
Block40795	Chr.5	32255735	32269430	h	a	a	b	h	b	h	b	h	h	a	a	b	b	b	a	h	a	h	h	a	h	b	h	b	a	a	h	b	h	h	h	h	h	h	h	h	h	h	a	h	h	h	a	h	b
Block40837	Chr.5	32295085	32303467	h	a	a	b	h	h	h	b	h	h	a	a	b	b	b	a	h	a	h	h	a	h	b	h	b	a	a	h	b	h	h	h	h	h	h	a	h	h	h	a	h	h	h	a	h	b
Block40841	Chr.5	32309130	32315619	h	a	a	b	h	h	h	b	h	h	a	a	b	b	b	a	a	a	h	h	a	h	b	h	b	a	a	h	b	a	h	h	h	a	h	h	h	h	h	a	h	h	h	a	h	b
Block40850	Chr.5	32331458	32336884	h	a	a	b	h	h	h	b	h	h	a	a	b	b	b	a	h	a	h	h	a	h	b	h	b	a	a	h	b	a	h	h	h	a	h	h	h	h	h	a	h	h	h	a	h	b
Block40852	Chr.5	32338347	32344691	h	a	a	b	h	h	h	b	h	h	a	a	b	b	b	a	h	a	h	h	a	h	b	h	b	a	a	h	b	a	h	h	h	a	h	h	h	h	h	a	h	h	h	a	h	b
Block40864	Chr.5	32360056	32365237	a	a	a	b	h	h	h	b	h	h	a	a	b	b	b	a	h	a	h	h	a	h	b	h	b	a	a	h	b	a	h	h	h	a	h	h	h	h	h	a	h	h	h	a	h	b
Block40866	Chr.5	32366846	32372007	a	a	a	b	h	h	h	b	h	h	a	a	b	b	b	a	h	a	h	h	a	h	b	h	b	a	a	h	b	h	h	h	h	h	h	h	h	h	h	a	h	h	h	a	h	b
Block40905	Chr.5	32398910	32406759	h	a	a	b	h	a	h	b	h	h	a	a	b	b	b	a	h	a	h	h	a	h	b	h	b	a	a	h	b	h	h	h	h	a	h	h	h	h	h	a	h	h	h	a	h	b
Block40920	Chr.5	32419975	32425856	h	a	a	b	h	h	h	b	h	h	a	a	b	b	b	a	h	a	h	h	a	h	b	h	b	a	a	h	h	h	h	h	h	h	h	h	h	h	h	a	h	h	h	a	h	b
Block40928	Chr.5	32433769	32439435	h	a	a	b	h	h	h	b	h	h	a	a	b	b	b	a	h	a	h	h	a	h	b	h	b	a	a	h	h	h	h	h	h	h	h	h	h	h	h	a	h	h	h	a	h	b
Block40929	Chr.5	32441221	32567462	h	a	a	b	h	h	h	b	h	h	a	a	b	b	b	a	h	a	h	h	a	h	b	h	b	a	a	a	h	h	h	h	h	h	h	h	h	h	h	a	h	h	h	a	h	b
Block40931	Chr.5	32570913	32623921	h	a	a	b	h	h	h	b	h	h	a	a	b	b	b	a	h	a	h	h	a	h	b	h	b	a	a	h	h	h	h	h	h	h	h	h	a	h	h	a	h	h	h	a	h	b
Block40952	Chr.5	32650182	32655285	h	a	a	b	h	h	h	b	h	h	a	a	b	b	b	a	h	a	h	h	a	h	b	h	b	a	a	h	h	a	h	h	h	h	h	h	h	h	h	a	h	h	h	a	h	b
Block40958	Chr.5	32661726	32667484	h	a	a	b	h	h	h	b	h	h	a	a	b	b	b	a	h	a	a	h	a	h	b	h	b	a	a	h	h	h	a	h	h	h	h	h	a	h	h	a	h	h	h	a	h	b
Block40987	Chr.5	32684619	32690307	h	a	a	b	h	h	h	b	h	h	a	a	b	b	b	a	h	a	a	h	a	h	b	h	b	a	a	h	h	h	a	h	h	h	h	h	a	h	h	a	h	h	h	a	h	b
Block40991	Chr.5	32703463	32709239	h	a	a	b	h	h	a	b	h	h	a	a	b	b	b	a	h	a	h	h	a	h	b	h	b	a	a	h	h	h	h	h	h	h	h	h	h	a	h	a	h	a	h	a	h	b
Block41006	Chr.5	32721729	32727433	h	a	a	b	h	h	h	b	a	h	a	a	b	b	b	a	h	a	a	h	a	h	b	h	b	a	a	a	a	h	a	a	h	h	h	a	h	a	a	a	h	a	h	a	h	b
Block41022	Chr.5	32743185	32768399	h	a	a	b	h	h	a	b	a	h	a	a	h	b	b	a	h	a	a	a	a	h	h	h	b	a	a	a	a	a	h	a	a	a	a	a	a	h	a	a	h	a	a	a	h	h
Block41070	Chr.5	33181671	33231356	h	a	a	h	h	h	h	b	a	h	a	a	h	b	b	a	h	a	a	a	a	h	h	h	b	a	a	a	a	h	h	a	a	a	a	a	a	h	a	a	h	h	a	a	h	h
Block41073	Chr.5	33281417	33287047	h	a	a	h	h	h	h	b	a	h	a	a	b	b	b	a	h	a	a	h	a	h	b	h	b	a	a	h	h	a	a	h	h	a	h	h	h	h	h	a	h	h	h	a	h	b
Block41139	Chr.5	33368559	33379261	h	a	h	b	h	h	h	b	h	h	a	a	b	b	b	a	h	a	a	a	a	h	b	h	b	a	a	h	h	h	h	h	h	h	h	h	h	h	a	a	h	h	h	a	h	b
Block41150	Chr.5	33394926	33400410	h	a	h	b	h	h	h	b	h	h	a	a	b	b	b	a	h	a	a	a	a	h	b	h	b	a	a	h	h	h	h	h	h	h	h	h	h	h	a	a	h	h	h	a	h	b
Block41163	Chr.5	33417659	33422714	h	a	h	b	h	h	a	b	h	h	a	a	b	b	b	a	h	a	a	a	a	a	b	h	b	a	a	h	h	h	h	h	h	h	h	h	h	h	a	a	h	h	h	a	h	b
Block41173	Chr.5	33425160	33439372	h	a	h	b	h	h	a	b	h	h	a	a	b	b	b	a	h	a	a	h	a	h	b	h	b	a	a	h	h	a	h	a	h	h	h	h	h	h	h	a	h	h	h	a	h	b
Block41192	Chr.5	33454846	33462865	h	a	h	b	h	h	h	b	h	h	a	a	b	b	b	a	h	a	a	h	a	h	b	h	b	a	a	h	h	h	h	h	h	h	h	h	h	h	h	a	h	h	h	a	h	b
Block41208	Chr.5	33482245	33487671	h	a	h	b	h	h	h	b	h	h	a	a	b	b	b	a	h	a	a	h	a	h	b	h	b	a	a	h	h	h	h	h	h	h	h	h	h	h	h	a	h	h	h	a	h	b
Block41209	Chr.5	33488312	33498913	h	a	a	b	h	h	h	b	h	h	a	a	b	b	b	a	h	a	a	h	a	h	b	h	b	a	a	h	h	a	h	a	h	h	h	h	h	h	h	a	h	h	h	a	a	b
Block41228	Chr.5	33523977	33529264	h	a	h	b	h	h	h	b	h	h	a	a	b	b	b	a	h	a	a	h	a	h	b	h	b	a	a	h	h	h	h	h	h	h	h	h	h	h	h	a	h	h	h	a	h	b
Block41254	Chr.5	33570531	33585246	h	a	h	b	h	h	h	b	h	h	a	a	b	b	b	a	h	a	a	h	a	h	b	h	b	a	a	h	h	h	h	a	h	a	h	h	h	h	h	a	h	h	h	a	h	b
Block41259	Chr.5	33589559	33594571	h	a	h	b	h	h	h	b	h	h	a	a	b	b	b	a	h	a	a	h	a	a	b	h	b	a	a	h	h	h	h	h	h	h	h	a	a	h	h	a	h	h	h	a	h	b
Block42073	Chr.5	34407977	34416101	h	a	h	b	h	a	h	b	h	h	a	a	b	b	b	a	h	a	a	h	a	a	b	h	b	a	a	h	h	a	h	h	h	h	h	a	a	h	h	a	h	h	h	a	h	b
Block42077	Chr.5	34420275	34427290	h	a	h	b	h	a	h	b	h	h	a	a	b	b	b	a	h	a	a	h	a	a	b	h	b	a	a	a	h	h	h	h	h	h	h	h	a	h	h	a	h	h	h	a	h	b
Block42092	Chr.5	34446501	34456481	h	a	h	b	h	h	h	b	h	h	a	a	b	b	b	a	h	a	a	h	a	a	b	h	b	a	a	h	h	h	h	a	h	a	h	h	h	h	h	a	h	h	h	a	h	b
Block42130	Chr.5	34499280	34504807	h	a	h	b	h	h	h	b	h	h	a	a	b	b	b	a	h	a	a	h	a	a	b	h	b	a	a	h	h	h	h	h	h	a	h	h	h	h	h	a	h	h	h	a	h	b
Block42189	Chr.5	34576957	34583089	a	a	h	b	h	h	h	b	h	h	a	a	b	b	b	a	h	a	a	h	a	a	b	h	b	a	a	h	h	h	h	h	h	h	h	h	h	h	h	a	h	h	h	a	h	b
Block42220	Chr.5	34604221	34616384	h	a	h	b	h	h	a	b	h	h	a	a	b	b	b	a	h	a	a	h	a	a	b	h	b	a	a	h	h	h	h	h	h	h	h	h	h	h	h	a	h	h	h	a	h	b
Block42221	Chr.5	34617665	34631328	h	a	h	b	h	h	h	b	h	h	a	a	b	b	b	a	h	a	a	h	a	a	b	h	b	a	a	h	h	h	h	h	h	h	h	h	h	h	h	a	h	h	h	a	h	b
Block42222	Chr.5	34631790	34671680	h	a	h	b	h	h	h	b	h	h	a	a	b	b	b	a	h	a	a	h	a	a	b	h	b	a	a	h	h	h	h	h	h	h	h	h	h	h	a	a	h	h	h	a	h	b
Block42227	Chr.5	34685423	34691641	h	a	h	b	h	h	h	b	h	h	a	a	b	b	b	a	h	a	a	h	a	a	b	h	b	a	a	h	h	h	h	h	h	h	h	h	h	h	a	a	h	h	h	a	h	b
Block42229	Chr.5	34695849	34702022	h	a	h	b	h	h	h	b	h	h	a	a	b	b	b	a	h	a	a	h	a	a	b	h	b	a	a	h	h	h	h	h	h	h	h	h	h	h	h	a	h	h	h	a	h	b
Block42231	Chr.5	34704641	34742491	h	a	h	b	h	h	h	b	h	h	a	a	b	b	b	a	h	a	a	h	a	a	b	h	b	a	a	h	h	h	h	h	h	h	h	h	h	h	h	a	h	h	h	a	h	b
Block42232	Chr.5	34750258	34763127	h	a	h	b	h	h	h	b	h	h	a	a	b	b	b	a	h	a	a	h	a	a	b	h	b	a	a	h	h	h	h	h	h	h	h	a	h	h	h	a	h	h	h	a	h	b
Block42235	Chr.5	34763961	34841883	h	a	h	b	h	h	h	b	h	h	a	a	b	b	b	a	h	a	a	h	a	a	b	h	b	a	a	h	h	h	h	h	h	h	h	a	h	h	h	a	h	h	h	a	h	b
Block42248	Chr.5	34848503	34895218	h	a	h	b	h	h	a	b	h	h	a	a	b	b	b	a	h	a	a	h	a	a	b	h	b	a	a	h	h	h	h	h	h	h	a	h	h	h	h	a	h	h	h	a	h	b
Block42251	Chr.5	34900588	34912635	h	a	h	b	h	h	a	b	h	h	a	a	b	b	b	a	h	a	a	h	a	a	b	h	b	a	a	h	h	h	h	h	h	h	h	h	h	h	h	a	h	h	h	a	h	b
Block42255	Chr.5	34920449	34971798	h	a	h	b	h	h	a	b	h	h	a	a	b	b	b	a	h	a	a	h	a	a	b	h	b	a	a	h	h	h	h	h	h	h	h	h	h	h	h	a	h	h	h	a	h	b
Block42256	Chr.5	34994956	35061273	h	a	h	b	h	h	a	b	h	h	a	a	b	b	b	a	h	a	a	h	a	a	b	h	b	a	a	h	h	h	h	h	h	h	h	h	h	h	b	a	h	h	h	a	h	b
Block42257	Chr.5	35067834	35076936	h	a	h	b	h	h	a	b	h	h	a	a	b	b	b	a	h	a	a	h	a	a	b	h	b	a	a	h	h	h	h	h	h	h	h	h	h	h	b	a	h	h	h	a	h	b
Block42259	Chr.5	35077598	35098321	h	a	h	b	h	h	a	b	h	h	a	a	b	b	b	a	h	a	a	h	a	a	b	h	b	a	a	h	h	h	h	h	h	h	h	h	h	h	b	a	h	h	h	a	h	b
Block42262	Chr.5	35099818	35107169	h	a	h	b	h	h	a	b	h	h	a	a	b	b	b	a	h	a	a	h	a	a	b	h	b	a	a	h	h	h	h	h	h	h	h	h	h	h	b	a	h	h	h	a	h	b
Block42264	Chr.5	35107707	35113792	h	a	h	b	h	h	a	b	h	h	a	a	b	b	b	a	h	a	a	h	a	a	b	h	b	a	a	h	h	h	h	h	h	h	h	h	h	h	b	a	h	h	h	a	h	b
Block42265	Chr.5	35114770	35197450	h	a	h	b	h	h	a	b	h	h	a	a	b	b	b	a	h	a	a	h	a	a	b	h	b	a	a	h	h	h	h	h	h	h	h	h	h	h	b	a	h	h	h	a	h	b
Block42266	Chr.5	35203701	35214226	h	a	h	b	h	h	a	b	h	h	a	a	b	b	b	a	h	a	a	h	a	a	b	h	b	a	a	h	h	h	h	h	h	h	h	h	h	h	b	a	h	h	h	a	h	b
Block42269	Chr.5	35249596	35304431	h	a	h	b	h	h	a	a	a	h	h	h	a	h	h	a	a	b	a	b	a	h	b	h	b	h	a	h	a	b	h	h	h	b	b	h	a	b	h	a	h	a	h	a	b	b
Block42679	Chr.5	44272564	44292896	a	a	a	h	a	h	h	a	a	h	h	h	a	h	h	a	a	b	a	b	a	h	b	h	b	h	a	h	a	b	h	h	h	b	b	h	a	b	h	a	h	a	h	a	b	b
Block42681	Chr.5	44297247	44317751	a	a	a	h	a	h	h	a	a	h	h	h	a	h	h	a	a	b	a	b	a	h	b	h	b	h	a	h	a	b	h	h	h	b	b	h	a	b	h	a	h	a	h	a	b	b
Block42682	Chr.5	44319441	44328774	a	a	a	h	a	h	h	a	a	h	h	h	a	h	h	a	a	b	a	b	a	h	b	h	b	h	a	h	a	b	h	h	h	b	b	h	a	b	h	a	h	a	h	a	b	b
Block42685	Chr.5	44365154	44389439	a	a	a	h	a	h	h	a	a	h	h	h	a	h	h	a	a	b	a	b	a	h	b	h	b	h	a	h	a	b	h	h	h	b	b	h	a	b	h	a	h	a	h	a	b	b
Block42686	Chr.5	44392381	44406298	a	a	a	h	a	h	h	a	a	h	h	h	a	h	h	a	a	b	a	b	a	h	b	h	b	h	a	h	a	b	h	h	h	b	b	h	a	b	h	a	h	a	h	a	b	b
Block42687	Chr.5	44439770	44457671	a	a	a	h	a	h	h	a	a	h	h	h	a	h	h	a	h	b	a	b	a	h	b	h	b	a	a	h	a	b	a	h	h	b	b	a	h	b	a	a	h	h	h	a	b	b
Block42721	Chr.5	44471075	44563025	a	a	a	h	a	h	a	a	a	h	h	h	a	h	h	a	h	b	a	b	a	h	b	h	b	a	a	h	a	b	a	h	h	b	b	a	h	b	a	a	h	h	h	a	b	b
Block42723	Chr.5	44590066	44700585	a	a	a	h	a	h	a	a	a	h	h	h	a	h	h	a	h	b	a	b	a	h	b	h	b	a	a	h	a	b	a	h	h	b	b	a	h	b	a	a	h	h	h	a	b	b
Block42724	Chr.5	44747359	44755492	a	a	a	h	a	h	a	a	a	h	h	h	a	h	h	a	h	b	a	b	a	h	b	h	b	a	a	h	a	b	a	h	h	b	b	a	h	b	a	a	h	h	h	a	b	b
Block42725	Chr.5	44763856	44833845	a	a	a	h	a	h	a	a	a	b	h	h	a	h	b	h	a	b	b	b	a	h	h	h	b	h	h	b	h	a	a	h	b	h	b	a	h	b	a	h	h	b	h	a	b	b
Block42809	Chr.5	46063991	46073008	h	a	h	h	a	h	h	a	a	b	h	h	a	a	b	a	a	b	b	b	a	h	h	h	b	h	h	b	h	h	h	h	b	h	b	a	h	b	a	h	h	b	h	h	b	b
Block42842	Chr.5	46103875	46109894	h	a	h	h	a	h	h	a	a	b	h	h	a	h	b	h	a	b	b	b	a	h	a	h	b	h	h	b	h	h	h	h	b	h	b	a	h	b	a	h	h	b	h	h	b	b
Block42875	Chr.5	46137421	46144724	h	a	h	h	a	h	h	a	a	b	h	h	a	h	b	h	a	b	b	b	a	h	h	h	b	h	h	b	h	h	h	a	b	h	b	a	h	b	a	h	h	b	h	a	b	b
Block42977	Chr.5	46246480	46256176	h	a	h	h	a	h	h	a	a	b	h	h	a	a	b	h	a	b	b	b	a	h	h	h	b	h	h	b	h	h	h	a	b	h	b	a	h	b	a	h	h	b	h	h	b	b
Block42985	Chr.5	46344423	46357655	a	a	h	h	a	h	h	a	a	b	h	h	a	a	b	h	a	b	b	b	a	h	a	h	b	h	h	b	h	h	h	h	b	h	b	a	h	b	a	h	h	b	h	h	b	b
Block42987	Chr.5	46359932	46369430	a	a	h	h	a	h	h	a	a	b	h	h	a	a	b	h	a	b	b	b	a	h	h	a	b	h	h	b	h	h	h	h	b	a	b	a	h	b	a	h	h	b	h	h	b	b
Block43058	Chr.5	46426194	46431572	h	a	h	h	a	h	h	a	a	b	h	h	a	a	b	h	a	b	b	b	a	h	h	a	b	h	h	b	h	h	h	h	b	a	b	a	h	b	a	h	h	b	h	h	b	b
Block43059	Chr.5	46431601	46438483	h	a	h	h	a	h	h	a	a	b	h	h	a	a	b	a	a	b	b	b	a	h	h	a	b	h	a	b	h	h	h	h	b	h	b	a	h	b	a	h	h	b	h	h	b	b
Block43072	Chr.5	46456856	46466363	h	a	h	h	a	h	h	a	a	b	h	h	a	a	b	a	a	b	b	b	a	h	h	a	b	h	a	b	h	h	h	h	b	h	b	a	h	b	a	h	h	b	h	h	b	b
Block43073	Chr.5	46466457	46549309	h	a	h	h	a	h	h	a	a	b	h	h	a	a	b	a	a	b	b	b	a	h	h	a	b	h	a	b	h	h	h	b	b	h	b	a	h	b	a	h	h	b	h	h	b	b
Block43075	Chr.5	46550806	46557901	h	a	h	h	a	h	h	a	a	b	h	h	h	a	b	h	a	b	b	b	a	h	h	a	b	h	h	h	h	b	h	b	b	h	b	a	h	b	a	b	h	b	h	h	b	b
Block43095	Chr.5	46570697	46576337	h	a	h	h	a	h	h	a	a	b	h	h	h	a	b	h	a	b	b	b	a	h	h	a	b	h	h	h	h	h	b	b	b	h	b	a	h	b	a	b	h	b	b	h	b	b
Block43101	Chr.5	46578883	46584922	h	a	h	b	a	h	h	a	a	b	h	h	h	a	b	h	a	b	b	b	a	h	h	a	h	h	h	h	h	h	b	b	b	h	b	a	h	b	a	h	h	b	h	h	b	b
Block43187	Chr.5	46680657	46710349	h	a	h	h	a	h	h	a	a	b	h	h	h	a	b	h	a	b	b	b	a	h	h	a	h	h	h	h	h	h	b	b	b	h	b	a	h	b	a	h	h	b	h	h	b	b
Block43189	Chr.5	46725414	46734790	h	a	h	a	a	h	h	a	a	b	h	h	h	a	b	h	a	b	b	b	a	h	h	a	h	h	h	h	h	h	b	b	b	h	b	a	h	b	a	h	h	b	h	h	b	b
Block43190	Chr.5	46738409	46758298	h	a	h	a	a	h	h	a	a	b	h	h	h	a	b	h	a	b	b	b	a	h	h	a	h	h	h	h	h	h	b	b	b	h	b	a	h	h	a	h	h	b	h	h	b	b
Block43191	Chr.5	46764802	46779245	h	a	h	a	a	h	h	a	a	b	h	h	h	a	b	h	a	b	b	b	a	h	h	a	h	h	h	h	h	h	b	b	b	h	b	a	h	h	a	h	h	b	h	h	b	b
Block43192	Chr.5	46780407	46810468	h	a	h	a	a	h	h	a	a	b	h	h	h	a	b	h	a	b	b	b	a	h	h	a	h	h	h	a	h	a	b	b	b	h	b	a	h	h	a	h	h	b	h	h	b	b
Block43198	Chr.5	46822078	46827221	h	a	h	h	a	h	h	a	a	b	a	h	h	a	b	h	a	b	b	b	a	h	a	a	h	h	h	h	h	h	b	b	b	h	b	a	h	h	a	h	h	b	h	h	b	b
Block43225	Chr.5	46866596	46880121	h	a	h	h	a	h	h	a	a	b	h	h	h	a	b	h	a	b	b	b	a	h	h	a	h	h	h	h	h	h	b	b	b	h	b	a	a	h	a	h	h	b	h	h	b	b
Block43256	Chr.5	46908184	46921494	h	a	h	h	a	b	h	a	a	b	h	h	h	a	b	h	a	b	b	b	a	h	h	a	h	h	h	h	h	h	b	h	b	h	b	a	a	h	a	h	h	b	h	h	b	b
Block43257	Chr.5	46923138	46977702	h	a	h	h	a	b	h	a	a	b	h	h	h	a	b	h	a	b	b	b	a	h	h	a	h	h	h	h	h	h	b	h	b	h	b	a	a	h	a	h	h	b	h	h	b	b
Block43263	Chr.5	47094553	47106991	h	a	h	h	a	b	h	a	a	b	h	h	h	a	b	h	a	b	b	b	a	h	h	a	h	h	h	h	h	h	b	h	b	h	b	a	h	h	a	h	h	b	h	h	b	b
Block43273	Chr.5	47121948	47136155	h	a	h	h	h	b	h	a	a	b	h	h	h	a	b	h	a	b	b	b	a	h	h	a	h	h	h	h	h	h	b	h	b	h	b	a	h	h	a	h	h	b	h	h	b	b
Block43274	Chr.5	47138154	47145965	h	a	h	h	h	b	h	a	a	b	h	h	h	a	b	h	a	b	b	b	a	h	h	a	h	h	h	h	h	h	b	a	b	h	b	a	h	h	a	h	h	b	h	h	b	b
Block43275	Chr.5	47146188	47153778	h	a	h	h	h	b	h	a	a	b	h	h	a	a	b	h	a	b	b	b	a	h	h	a	h	h	h	h	h	h	b	h	b	h	b	a	h	h	a	h	h	b	h	h	b	b
Block43308	Chr.5	47186765	47192571	h	a	h	h	h	b	h	a	a	b	h	h	a	a	b	h	a	b	b	b	a	h	h	a	h	h	h	a	h	h	b	h	b	h	b	a	h	h	a	h	h	b	h	h	b	b
Block43311	Chr.5	47194494	47205438	h	a	h	h	h	b	h	a	a	b	h	h	a	a	b	h	a	b	b	b	a	h	h	a	h	h	h	a	h	h	b	h	b	h	b	a	h	h	a	h	h	b	h	h	b	b
Block43312	Chr.5	47205453	47221323	h	a	h	h	h	b	h	a	a	b	a	a	h	a	b	h	a	b	b	b	a	h	h	a	h	h	h	h	h	a	b	h	b	h	b	a	h	h	a	h	h	b	h	h	b	b
Block43319	Chr.5	47232483	47241421	h	a	h	h	h	b	h	b	b	h	h	h	b	b	h	h	h	b	b	h	b	a	h	h	a	h	b	b	h	h	h	b	b	a	a	h	b	a	b	a	b	h	h	a	b	b
Block43659	Chr.6	1259055	1269522	h	h	h	b	h	b	b	b	b	h	h	h	b	b	h	h	h	b	b	h	b	a	h	h	a	h	b	b	h	h	h	b	b	a	a	a	b	a	b	a	b	h	h	h	b	b
Block43715	Chr.6	1358947	1365395	h	h	h	b	h	b	b	b	b	a	h	h	b	b	h	h	h	b	b	h	b	a	h	h	a	h	b	b	h	h	h	b	b	a	a	a	b	a	b	a	b	h	h	h	b	b
Block43718	Chr.6	1367091	1372283	h	h	h	b	h	b	b	b	b	h	h	h	b	b	h	h	h	b	b	h	b	a	h	h	a	h	b	b	h	h	h	b	b	a	a	h	b	a	b	a	b	h	h	h	b	b
Block43726	Chr.6	1383306	1394635	h	h	h	b	h	b	b	b	b	h	h	h	b	b	h	a	h	b	b	h	b	a	h	h	a	h	b	b	h	h	h	b	b	a	a	h	b	a	b	a	b	h	h	h	b	b
Block43735	Chr.6	1402417	1407771	a	h	h	b	h	b	b	b	b	h	h	h	b	b	h	h	h	b	b	h	b	a	h	h	a	h	b	b	h	h	h	b	b	a	a	h	b	a	b	a	b	h	h	h	b	b
Block43781	Chr.6	1482537	1503693	h	h	h	b	h	b	b	b	b	h	h	h	b	b	h	h	h	b	b	h	b	a	h	h	a	h	b	b	h	h	h	b	b	a	a	h	b	a	b	a	b	h	h	h	b	b
Block43783	Chr.6	1521141	1568014	h	h	h	b	h	b	b	b	b	h	h	h	b	b	h	h	h	b	b	h	b	a	h	h	a	h	b	b	h	h	h	b	b	a	a	h	b	a	b	a	b	h	h	h	b	b
Block43851	Chr.6	1713587	1718792	h	h	h	b	h	b	b	b	b	h	h	h	b	h	h	h	h	h	b	h	h	a	h	h	a	h	b	b	h	h	h	b	b	a	a	h	b	a	b	a	b	h	h	h	b	b
Block43864	Chr.6	1874459	1895410	h	h	h	b	h	b	b	b	b	h	h	h	b	h	h	h	h	h	b	h	h	a	h	h	a	h	b	b	h	h	h	b	b	a	a	h	b	a	b	a	b	h	h	h	b	b
Block43865	Chr.6	1932389	1965812	h	h	h	b	h	b	b	b	b	h	h	h	b	h	h	h	h	h	b	h	h	a	h	h	a	h	b	b	h	h	h	b	b	a	a	h	b	a	b	a	b	h	h	h	b	b
Block43866	Chr.6	1967248	2043138	a	h	h	b	h	b	b	b	b	h	h	h	b	h	h	h	h	h	b	h	h	a	h	h	a	h	b	b	h	h	h	b	b	a	a	h	b	a	b	a	b	h	h	h	b	b
Block43867	Chr.6	2080959	2106675	a	h	h	b	h	b	b	b	b	h	h	h	b	h	h	h	h	h	b	h	h	a	h	h	a	h	b	b	h	b	h	b	b	a	a	h	b	a	b	a	b	h	h	h	b	b
Block43874	Chr.6	2148494	2165360	a	h	h	h	h	b	b	b	b	h	h	h	b	h	h	h	h	h	b	h	h	a	h	h	a	h	b	b	h	b	h	b	b	a	a	h	b	a	b	a	b	h	h	h	b	b
Block43876	Chr.6	2167410	2176416	a	h	h	h	h	b	b	b	b	h	h	h	b	h	h	h	h	h	b	h	h	a	h	h	a	h	b	b	h	b	h	b	b	a	a	h	b	a	b	a	b	h	h	h	b	b
Block43877	Chr.6	2176715	2183111	a	h	h	h	h	b	b	b	b	h	h	h	h	h	h	h	h	h	b	h	h	a	h	h	a	h	h	b	h	b	b	b	h	a	a	h	h	h	b	a	b	h	h	h	h	h
Block43988	Chr.6	2310268	2315447	a	h	h	h	h	b	b	b	b	h	h	h	b	h	h	h	h	h	b	h	h	a	h	h	a	h	b	b	h	b	h	b	h	a	a	h	h	h	b	a	h	h	h	h	b	h
Block43997	Chr.6	2319399	2332084	a	h	h	h	h	b	b	b	b	h	h	h	b	h	h	h	h	h	b	h	h	h	h	h	a	h	b	b	h	b	h	b	b	a	a	h	b	h	b	a	b	h	h	h	b	b
Block45108	Chr.6	3495939	3507591	a	h	h	h	b	b	b	b	b	h	h	h	b	a	h	h	h	h	b	h	h	h	h	h	a	h	b	b	h	b	h	b	b	a	a	a	b	h	b	a	b	h	h	h	b	b
Block45114	Chr.6	3517327	3524183	a	h	h	h	b	b	b	b	b	h	h	h	b	h	h	h	h	h	b	h	a	h	h	h	a	h	b	b	h	b	h	b	b	a	a	h	b	h	b	a	b	h	h	h	b	b
Block45123	Chr.6	3533285	3539866	a	h	h	h	b	b	b	b	b	h	h	h	b	h	h	h	h	h	b	h	h	h	h	h	a	h	b	b	h	b	h	b	b	a	a	h	b	h	b	a	b	h	h	h	b	b
Block45130	Chr.6	3546921	3561759	a	h	h	h	b	b	b	b	b	h	h	h	b	h	h	h	h	h	b	h	h	h	h	h	a	h	b	b	h	b	h	b	b	a	a	h	b	h	b	a	b	h	h	h	b	b
Block45131	Chr.6	3577887	3590886	a	h	h	h	b	b	b	b	b	h	h	h	b	h	h	h	h	h	b	b	h	h	h	h	a	h	b	b	h	b	h	b	b	a	h	h	b	h	b	a	b	h	h	h	b	b
Block45231	Chr.6	3871303	3880167	a	h	h	h	b	b	b	b	b	h	h	h	b	h	h	h	h	h	b	b	h	h	h	h	a	h	b	b	h	b	h	b	b	a	h	h	b	h	b	a	b	h	h	h	b	b
Block45234	Chr.6	3882246	3887543	a	h	h	h	b	b	b	b	b	h	h	h	b	h	h	h	h	h	b	b	h	h	h	h	a	h	b	b	h	b	h	b	b	a	h	h	b	h	b	a	b	h	h	h	b	b
Block45235	Chr.6	3887554	3893139	a	h	h	h	b	b	b	b	b	h	h	h	b	h	h	h	h	h	b	b	h	h	h	h	a	h	b	b	h	b	h	b	b	a	h	h	b	h	b	a	b	h	h	h	b	b
Block45236	Chr.6	3893191	3917171	a	h	h	h	b	b	b	b	b	h	h	h	b	h	h	h	h	h	b	b	h	h	h	h	a	h	b	b	h	b	h	b	b	a	h	h	b	h	b	a	b	h	h	h	b	b
Block45237	Chr.6	3917496	3930179	a	h	h	h	b	b	b	b	b	h	h	h	b	h	h	h	h	h	b	b	h	h	h	h	a	h	b	b	h	b	h	b	b	a	h	h	b	h	b	a	b	h	h	h	b	b
Block45238	Chr.6	3930188	3939330	a	h	h	h	b	b	b	b	b	h	h	h	b	h	h	h	h	h	b	b	h	h	h	h	a	h	b	b	h	b	h	b	b	a	h	h	b	h	b	a	b	h	h	h	b	b
Block45239	Chr.6	3939496	3956673	a	h	h	h	b	b	b	b	b	h	h	h	b	h	h	h	h	h	b	b	h	h	h	h	a	h	b	b	h	b	h	b	b	a	h	h	b	h	b	a	b	h	h	h	b	b
Block45241	Chr.6	3958209	3965130	a	h	h	h	b	b	b	b	b	h	h	h	b	h	h	h	h	h	b	b	h	h	h	h	a	h	b	b	h	b	h	b	b	a	h	h	b	h	b	a	b	h	h	h	b	b
Block45246	Chr.6	3974301	3979512	a	h	h	h	b	b	b	b	b	h	h	h	b	h	h	a	h	h	b	b	h	h	h	h	a	h	b	b	h	b	h	b	b	a	h	h	b	h	b	a	b	h	h	h	b	b
Block45249	Chr.6	3981486	3989409	a	h	h	h	b	b	b	b	b	h	h	a	b	h	h	h	h	h	b	b	h	h	h	h	a	h	b	b	h	b	h	b	b	a	h	h	b	h	b	a	b	h	h	h	b	b
Block45256	Chr.6	3998521	4006975	a	h	h	h	b	b	b	b	b	h	h	h	b	h	h	h	h	h	b	b	a	h	h	h	a	h	b	b	h	b	a	b	b	a	h	a	b	h	b	a	b	h	h	h	b	b
Block45343	Chr.6	4059694	4065348	a	h	h	h	b	b	b	b	b	h	h	h	b	h	h	h	h	h	b	b	h	h	h	h	a	h	b	b	h	b	h	b	b	a	h	h	b	h	b	a	b	h	h	h	b	b
Block45374	Chr.6	4100527	4143567	a	h	h	h	b	b	b	b	b	h	h	h	b	h	h	h	h	h	b	b	h	h	h	h	a	h	b	b	h	b	h	b	b	a	h	h	b	h	b	a	b	h	h	h	b	b
Block45375	Chr.6	4149070	4168559	a	h	h	h	b	b	b	b	b	h	h	h	b	h	h	a	h	h	b	b	h	h	h	h	a	h	b	b	h	b	h	b	b	a	h	h	b	h	b	a	b	h	h	h	b	b
Block45376	Chr.6	4205889	4399637	a	h	h	h	b	b	b	b	b	h	h	h	b	h	h	a	h	h	b	b	h	h	h	h	a	h	b	b	h	b	h	b	b	a	h	h	b	h	b	a	b	h	h	h	b	b
Block45387	Chr.6	4412802	4420361	a	h	h	h	b	b	b	h	h	a	a	a	b	a	h	a	a	a	h	h	b	h	a	a	a	h	b	h	b	b	h	b	h	a	a	a	a	h	a	a	b	b	h	h	b	b
Block46088	Chr.6	27672614	27988714	h	a	h	a	b	b	h	h	h	a	a	a	b	a	h	a	a	a	h	h	b	h	a	a	a	h	b	h	b	b	h	b	h	a	a	a	a	h	a	a	b	b	h	h	b	b
Block46090	Chr.6	28290591	28359682	h	a	h	a	b	b	h	h	h	a	a	a	b	a	h	a	h	a	h	h	b	h	a	a	h	h	b	h	b	b	h	b	h	a	a	a	a	a	a	a	b	b	h	h	b	b
Block46244	Chr.6	28456243	28461435	h	h	h	h	b	b	h	h	h	a	a	a	b	a	h	a	h	a	h	h	b	h	a	a	h	h	b	h	b	b	a	b	h	a	h	a	a	h	a	a	b	b	a	h	b	b
Block46330	Chr.6	28514009	28519526	h	h	h	h	b	b	h	a	h	a	a	a	b	a	h	a	h	a	h	h	b	h	a	a	h	h	b	h	b	b	h	b	h	a	b	a	a	h	a	a	b	b	h	h	b	b
Block46335	Chr.6	28525504	28537952	h	h	h	h	b	b	h	a	h	a	a	a	b	a	h	a	h	a	h	h	b	h	a	a	h	h	b	h	b	b	h	b	h	a	b	a	a	h	a	a	b	b	h	h	b	b
Block46337	Chr.6	28551965	28562742	h	h	h	h	b	b	h	a	h	a	a	h	b	a	h	a	h	a	h	h	b	h	a	a	h	h	b	h	b	b	h	b	h	a	b	a	a	h	a	a	b	b	h	h	h	b
Block46343	Chr.6	28567767	28692461	h	h	h	h	b	b	h	h	h	a	a	h	b	a	h	a	h	a	h	h	b	h	a	a	h	h	b	h	b	b	h	b	h	a	b	a	a	h	a	a	b	b	h	h	h	b
Block46345	Chr.6	28729993	28875864	h	h	h	h	b	b	h	h	h	a	a	h	b	a	h	a	h	a	h	h	b	h	a	a	h	h	b	h	b	b	h	b	h	a	b	a	a	h	a	a	b	b	h	h	h	b
Block46346	Chr.6	28875885	28882053	h	h	h	h	b	b	h	h	h	a	h	h	b	a	a	a	h	a	a	h	b	h	a	a	h	h	b	h	b	b	h	b	a	a	b	a	a	h	a	a	b	b	h	h	h	b
Block46484	Chr.6	29023761	29030351	h	h	h	h	b	b	h	h	h	a	h	h	b	a	h	a	h	a	h	a	b	h	a	a	h	a	b	h	b	b	a	b	h	a	b	a	a	a	a	a	b	b	h	h	h	b
Block46519	Chr.6	29079673	29086159	h	h	h	h	b	b	h	h	h	a	h	h	b	a	h	a	h	a	h	h	b	h	a	a	h	h	b	a	b	b	h	b	h	a	b	a	a	h	a	a	b	b	h	a	h	b
Block46542	Chr.6	29107680	29113078	h	h	h	h	b	b	h	h	h	a	h	h	b	a	h	a	h	a	h	h	b	h	a	a	h	h	b	h	b	b	h	b	h	a	b	a	a	h	a	a	b	b	h	h	a	b
Block46567	Chr.6	29142381	29148762	h	h	h	h	b	b	h	h	h	a	h	h	b	a	h	a	h	a	h	h	b	h	a	a	h	h	b	h	b	b	h	b	h	a	b	a	a	a	a	a	b	b	h	h	h	b
Block46742	Chr.6	29241347	29247540	h	h	h	h	b	b	h	h	h	a	h	h	b	a	h	a	h	a	h	h	b	h	a	a	h	h	b	h	b	b	h	b	h	a	b	a	a	h	a	a	b	b	h	h	h	b
Block46745	Chr.6	29254606	29259949	h	h	h	h	b	b	h	h	h	a	h	h	b	a	h	a	h	a	h	h	b	h	a	a	h	h	b	h	b	b	h	b	h	a	b	a	a	h	a	a	b	b	h	h	h	b
Block46746	Chr.6	29260184	29276683	h	h	h	h	b	b	h	h	h	a	h	h	b	a	h	a	h	a	h	h	b	a	a	a	h	h	b	h	b	b	h	b	h	a	b	a	a	h	a	a	b	b	h	a	h	b
Block46754	Chr.6	29289571	29295906	h	h	h	h	b	b	h	h	h	a	h	h	b	a	h	a	h	a	h	h	b	h	a	a	h	h	b	h	b	b	h	b	h	a	b	a	a	h	a	a	b	b	h	a	a	b
Block46762	Chr.6	29301069	29307804	h	h	h	h	b	b	h	a	h	a	h	h	b	a	h	a	h	a	a	h	b	h	a	a	h	h	b	h	b	b	h	b	h	a	b	a	a	h	a	a	b	b	h	h	a	b
Block46780	Chr.6	29327280	29332322	a	h	a	h	b	b	h	h	h	a	h	h	b	a	h	a	h	a	h	h	b	h	a	a	a	h	b	h	b	b	h	b	h	a	b	a	a	h	a	a	b	b	h	h	h	b
Block46796	Chr.6	29341276	29350050	h	h	h	h	b	b	h	h	h	a	h	h	b	a	h	a	h	a	h	h	b	h	a	a	h	a	b	h	b	h	h	b	h	a	b	a	a	h	a	a	b	b	h	h	h	b
Block46816	Chr.6	29366001	29454868	h	a	h	h	b	b	h	h	h	a	h	h	b	a	h	a	h	a	h	h	b	h	a	a	h	a	b	h	b	h	h	b	h	a	b	a	a	h	a	a	b	b	h	h	h	b
Block46820	Chr.6	29462147	29499189	h	a	h	h	b	b	h	h	h	a	h	h	b	a	h	a	h	a	h	h	b	h	a	a	h	h	b	h	b	h	h	b	h	a	b	a	a	h	a	a	b	b	h	h	h	b
Block46822	Chr.6	29508648	29576879	h	a	h	h	b	b	h	h	h	a	h	h	b	a	h	a	h	a	h	h	b	h	a	a	h	h	b	h	b	h	h	b	h	a	b	a	a	h	a	a	b	b	h	h	h	b
Block46823	Chr.6	29581511	29606611	h	a	h	h	b	b	h	h	h	a	h	h	b	a	h	a	h	a	h	h	b	h	a	a	h	h	b	h	b	h	h	b	h	a	b	a	a	h	a	a	b	b	h	b	h	b
Block46825	Chr.6	29633789	29650145	h	a	h	h	b	b	h	h	h	a	h	h	b	a	h	a	h	a	h	h	b	h	a	a	h	h	b	h	b	h	h	b	h	a	b	a	a	h	a	a	b	b	h	b	h	b
Block46826	Chr.6	29667677	29697040	h	h	h	h	b	b	h	h	h	a	h	h	b	a	h	a	h	a	h	h	b	h	a	a	h	h	b	h	b	h	h	b	h	a	b	a	a	h	a	a	b	b	h	b	h	b
Block46827	Chr.6	29704886	30042481	h	h	h	h	b	b	h	h	h	a	h	h	b	a	h	a	h	a	h	h	b	h	a	a	h	h	b	h	b	h	h	b	h	a	b	a	a	h	a	a	b	b	h	b	h	b
Block46830	Chr.6	30059025	30077975	h	h	b	h	b	b	h	h	h	a	h	h	b	a	h	a	h	a	h	h	b	h	a	a	h	h	b	h	b	h	h	b	h	a	b	a	a	h	a	a	b	b	h	b	h	b
Block46831	Chr.6	30083401	30249976	h	h	b	h	b	b	h	h	h	a	h	h	b	a	h	a	h	a	h	h	b	h	a	a	h	h	b	h	b	h	h	b	h	a	b	a	a	h	a	a	b	b	h	b	h	b
Block46832	Chr.6	30254812	30280473	h	h	b	h	b	b	h	h	h	a	h	h	b	a	h	a	h	a	h	h	b	h	a	a	h	h	b	h	b	h	h	b	h	a	b	a	a	h	a	a	b	b	h	b	h	b
Block46833	Chr.6	30311942	30350416	h	h	b	h	b	b	h	h	h	a	h	h	b	a	h	a	h	a	h	h	b	h	a	a	h	h	b	h	b	h	h	b	h	a	b	a	a	h	a	a	b	b	h	b	h	b
Block46838	Chr.6	30352508	30411510	h	h	b	h	b	b	h	h	h	a	h	h	b	a	h	a	h	a	h	h	b	h	a	a	h	h	b	h	b	h	h	b	h	a	b	a	a	h	a	a	b	b	h	b	h	b
Block46840	Chr.6	30414726	30421076	h	h	b	h	b	b	h	h	h	a	h	h	b	a	h	a	h	a	h	h	b	h	a	a	h	h	b	h	b	h	h	b	h	a	b	a	a	a	a	a	b	b	h	b	h	b
Block46841	Chr.6	30424291	30553100	h	h	b	h	b	b	h	h	h	a	h	h	b	a	h	a	h	a	h	h	b	h	a	a	h	h	b	h	b	h	h	b	h	h	b	a	a	a	a	a	b	b	h	b	h	b
Block46843	Chr.6	30566854	30596265	h	h	b	h	b	b	h	h	h	a	h	h	b	a	h	a	h	a	h	h	b	h	a	a	h	h	b	h	b	h	h	b	h	h	h	a	a	a	a	a	b	b	h	b	h	b
Block46844	Chr.6	30596343	30624416	h	h	b	h	b	b	h	h	h	a	h	h	b	a	h	a	h	a	h	h	b	h	a	a	h	h	b	h	b	h	h	b	h	h	h	a	a	a	a	a	b	b	h	b	h	b
Block46845	Chr.6	30629442	30670521	h	h	b	h	b	b	h	h	h	a	h	h	b	a	h	a	h	a	h	h	b	h	a	a	h	h	b	h	b	h	h	b	h	h	h	a	a	a	a	a	b	b	h	b	h	b
Block46847	Chr.6	30863257	31023401	h	h	b	h	b	b	h	h	h	a	h	h	b	a	h	a	h	a	h	h	b	h	a	a	h	h	b	h	b	h	h	b	h	h	h	a	a	a	a	a	b	b	h	b	h	b
Block46848	Chr.6	31069176	31456881	h	h	b	h	b	b	h	h	h	a	h	h	b	a	h	a	h	a	h	h	h	h	a	a	h	h	b	h	b	h	h	b	h	h	h	a	a	h	h	a	b	b	b	b	h	b
Block46866	Chr.6	31461920	31468346	h	h	b	h	b	b	h	h	h	a	h	h	b	a	h	a	h	a	h	h	h	h	a	a	h	h	b	h	b	h	h	b	h	h	h	a	a	h	h	a	b	b	b	b	h	b
Block46874	Chr.6	31478763	31484193	h	h	b	h	b	b	h	h	h	a	h	h	b	a	h	a	h	a	h	h	h	h	a	a	h	h	b	h	b	h	h	b	h	h	h	a	a	h	h	a	b	b	b	b	h	b
Block46876	Chr.6	31484302	31501876	h	h	b	h	b	b	h	h	h	a	h	h	b	a	h	a	h	a	h	h	h	h	a	a	h	h	b	h	b	h	h	b	h	h	h	a	a	h	h	a	b	b	b	b	h	b
Block46878	Chr.6	31502039	31507823	h	h	b	h	b	b	h	h	h	a	h	h	b	a	h	a	h	a	h	h	h	h	a	a	h	h	b	h	b	h	h	b	h	h	h	a	a	h	h	a	b	b	b	b	h	b
Block46879	Chr.6	31510516	31519280	h	h	b	h	b	b	h	b	h	a	b	b	b	a	h	a	h	a	h	h	h	h	a	a	h	h	b	h	b	h	h	b	h	h	h	a	a	a	b	a	b	b	b	b	h	b
Block47480	Chr.6	32293320	32299056	h	h	b	a	h	b	a	b	h	a	b	b	b	a	h	a	h	a	h	h	h	h	a	a	h	h	b	h	b	h	h	b	h	h	h	a	a	h	b	a	b	b	b	b	h	b
Block47483	Chr.6	32304023	32313499	h	h	b	a	h	b	a	b	h	a	b	b	b	a	h	a	h	a	h	h	h	h	a	a	h	h	b	h	b	h	h	b	h	h	h	a	a	h	b	a	b	b	b	b	h	b
Block47485	Chr.6	32314333	32327392	h	h	b	a	h	b	a	b	h	a	b	b	b	a	h	a	b	a	h	h	h	h	a	a	h	h	b	h	b	h	h	b	h	h	h	a	a	h	b	a	b	b	b	b	h	b
Block47562	Chr.6	32648669	32659202	b	a	b	a	h	b	a	b	h	a	b	b	b	a	h	a	b	a	h	h	h	h	a	a	h	h	b	h	b	h	h	b	h	h	h	a	a	h	b	a	b	b	b	b	h	b
Block47565	Chr.6	32682833	32781497	b	a	b	a	h	b	a	b	h	a	b	b	b	a	h	a	b	a	h	h	h	h	a	a	h	b	b	h	b	h	h	b	h	h	h	a	a	h	b	a	b	b	b	b	h	b
Block47591	Chr.6	32804744	32813469	b	a	b	a	h	b	a	b	h	a	b	b	b	a	h	a	b	a	h	h	h	h	a	a	h	b	b	h	b	h	h	b	h	h	h	a	a	h	b	a	b	b	b	b	h	b
Block47592	Chr.6	32813479	32844787	b	a	b	a	h	b	a	b	h	a	b	b	b	a	h	a	b	a	h	h	h	h	a	a	h	b	b	h	b	h	h	b	h	h	h	a	a	h	b	a	b	b	b	b	h	b
Block47595	Chr.6	32859219	32942882	b	a	b	a	h	b	a	b	h	a	b	b	b	a	h	a	b	a	h	h	h	h	a	a	h	b	b	h	b	h	h	b	h	h	h	a	a	h	b	a	b	b	b	b	h	b
Block47596	Chr.6	32956301	33042080	b	a	b	a	h	b	a	b	a	a	b	b	h	a	h	a	b	a	h	h	a	h	a	a	h	h	a	b	b	h	h	h	b	a	b	a	a	h	b	a	b	b	h	h	h	b
Block48322	Chr.6	34556977	34565412	b	a	h	a	a	b	a	b	a	a	b	b	h	a	h	a	b	a	h	h	a	h	a	a	h	h	a	b	b	h	h	h	b	a	b	a	a	h	b	a	b	b	h	h	h	b
Block48326	Chr.6	34576107	34581788	b	a	h	a	a	b	a	b	a	a	b	b	h	a	h	a	b	a	h	h	a	h	a	a	h	h	a	b	b	h	h	h	b	a	b	a	a	h	b	a	b	b	h	h	h	b
Block48327	Chr.6	34581908	34589063	b	a	h	a	a	b	a	b	a	a	b	b	h	a	h	a	b	a	h	h	a	h	a	a	h	h	a	b	b	h	h	h	b	a	b	a	a	h	b	a	b	b	h	h	h	b
Block48333	Chr.6	34598131	34609901	b	a	h	a	a	b	a	b	a	a	b	b	h	a	h	a	b	a	h	h	a	h	a	a	h	h	a	b	b	h	h	h	b	a	b	a	a	h	b	a	b	b	h	h	h	b
Block48342	Chr.6	34620830	34628061	b	a	h	a	a	b	a	b	a	a	b	b	h	a	h	a	b	a	h	h	a	h	a	a	h	h	a	b	b	h	h	h	b	a	b	a	a	h	b	a	b	b	h	h	h	b
Block48382	Chr.6	34667972	34675341	b	a	h	a	a	b	a	b	a	a	b	b	h	a	h	a	b	a	h	h	a	h	a	a	h	h	a	b	b	h	h	h	b	a	b	a	a	h	b	a	b	b	h	h	h	b
Block48383	Chr.6	34676864	34682378	b	a	h	a	a	b	a	b	a	a	b	b	h	a	h	a	b	a	h	h	a	h	a	a	h	h	a	b	b	h	h	h	b	a	b	a	a	h	b	a	b	b	h	h	h	b
Block48390	Chr.6	34690833	34706498	b	a	h	a	a	b	a	b	a	a	b	b	h	a	h	a	b	a	h	h	a	h	a	a	h	h	a	b	b	h	h	h	b	a	b	a	a	h	b	a	b	b	h	h	h	b
Block48399	Chr.6	34716271	34725810	b	a	h	a	a	b	a	b	a	a	b	b	h	a	h	a	b	a	h	h	a	h	a	a	h	h	a	b	b	h	h	h	b	a	b	a	a	h	b	a	b	b	h	h	h	b
Block48401	Chr.6	34728816	34734475	b	a	h	a	a	b	a	b	a	a	b	b	h	a	h	a	b	a	h	h	a	h	a	a	h	h	a	b	b	h	h	h	b	a	b	a	a	h	b	a	b	b	h	h	h	b
Block48403	Chr.6	34739811	34748029	b	a	h	a	a	b	a	b	a	a	b	b	h	a	h	a	b	a	h	h	a	h	a	a	h	h	a	b	b	h	h	h	b	a	b	a	a	h	b	a	b	b	h	h	h	b
Block48404	Chr.6	34748072	34757046	b	a	h	a	a	b	a	b	a	a	b	b	h	a	h	a	b	a	h	h	a	h	a	a	h	h	a	b	b	h	h	h	b	a	b	a	a	h	b	a	b	b	h	h	h	b
Block48408	Chr.6	34758708	34764603	b	a	h	a	a	b	a	b	a	a	b	b	h	a	h	a	b	a	h	h	a	h	a	a	h	h	a	b	b	h	h	h	b	a	b	a	a	h	b	a	b	b	h	h	h	b
Block48411	Chr.6	34768720	34805023	b	a	h	a	a	b	a	b	a	a	b	b	h	a	h	a	b	a	h	h	a	h	a	a	h	h	a	b	b	h	h	h	b	a	b	a	a	h	b	a	b	b	h	h	h	b
Block48415	Chr.6	34809198	34815872	b	a	h	a	a	b	a	b	a	a	h	h	h	a	h	a	b	a	h	h	a	h	a	a	h	h	a	b	b	h	h	h	b	a	b	a	a	h	b	a	b	h	h	h	h	b
Block48422	Chr.6	34820173	34827139	h	a	h	a	a	b	a	b	a	a	b	b	h	a	h	a	b	a	h	h	a	h	a	a	h	h	a	b	b	h	h	h	b	a	b	a	a	h	b	a	b	b	h	a	h	b
Block48432	Chr.6	34832879	34842226	b	a	h	a	a	b	a	b	a	a	h	b	h	a	h	a	b	a	h	h	a	h	a	a	h	h	a	h	h	h	h	h	b	a	h	a	a	h	b	a	b	h	h	a	h	b
Block48452	Chr.6	34849426	34859357	h	a	h	a	a	b	a	b	a	a	b	b	h	a	h	a	b	a	h	h	a	h	a	a	h	h	a	b	b	h	h	h	b	a	b	a	a	h	b	a	b	b	h	a	h	b
Block48576	Chr.6	34967322	35034167	b	a	h	a	a	b	a	b	a	a	b	b	h	a	h	a	b	a	a	h	a	h	a	a	a	h	a	b	b	h	h	h	b	a	b	a	h	a	b	a	h	b	a	a	h	b
Block48839	Chr.6	35562000	35571498	h	a	h	a	a	b	a	b	a	a	b	b	h	a	h	a	b	a	a	h	a	h	a	a	a	h	a	b	b	h	h	a	b	a	b	a	h	a	b	a	h	b	a	a	h	b
Block48843	Chr.6	35574308	35579507	h	a	h	a	a	b	a	b	a	a	b	b	h	a	h	a	b	a	a	h	a	h	a	a	a	h	a	b	b	h	h	a	b	a	b	a	h	a	b	a	h	b	a	a	a	b
Block48845	Chr.6	35579677	35594894	h	a	h	a	a	b	a	b	a	a	b	b	h	a	h	a	b	a	a	h	a	h	a	a	a	h	a	b	b	h	h	a	b	a	b	a	h	a	b	a	h	b	a	a	a	b
Block48847	Chr.6	35596840	35651873	h	a	h	a	a	b	a	b	a	a	b	b	h	a	h	a	b	h	a	h	a	h	a	a	a	h	a	b	b	h	h	h	b	a	b	a	h	h	b	a	h	b	h	a	h	b
Block48886	Chr.6	35682614	35687791	a	a	h	a	a	b	a	b	a	a	b	b	h	a	h	a	b	h	a	h	a	h	a	a	a	h	a	b	b	h	h	h	b	a	b	a	h	h	b	a	h	b	h	a	h	b
Block48897	Chr.6	35693848	35699454	h	a	h	a	a	b	a	b	a	a	b	b	h	a	h	a	b	h	h	h	a	h	a	a	a	h	a	b	b	h	h	h	b	a	b	a	h	a	b	a	h	b	h	a	h	b
Block48908	Chr.6	35719965	35729464	h	a	h	a	a	b	a	b	a	a	b	b	h	a	h	a	b	h	h	h	a	h	a	a	a	h	a	b	b	h	h	h	b	a	b	a	h	a	b	a	h	b	h	a	h	b
Block48910	Chr.6	35729699	35736623	h	a	h	a	a	b	a	b	a	a	b	b	h	a	h	a	b	h	h	h	a	h	a	a	a	h	a	b	b	h	h	h	b	a	b	a	h	a	b	a	h	b	h	a	h	b
Block48913	Chr.6	35744200	35754015	h	a	h	a	a	b	a	b	a	a	b	b	h	a	h	a	b	h	h	h	a	h	a	a	a	h	a	b	b	h	h	h	b	a	b	a	h	a	b	a	h	b	h	a	h	b
Block48915	Chr.6	35754972	35760730	h	a	h	a	a	b	a	b	a	a	b	b	h	a	h	a	b	h	h	h	a	h	a	a	a	h	a	b	b	h	h	h	b	a	b	a	h	a	b	a	h	b	h	a	h	b
Block48916	Chr.6	35760892	35766180	h	a	h	a	a	b	a	b	a	a	b	b	h	a	h	a	b	h	h	h	a	h	a	a	a	h	a	b	b	h	h	h	b	a	b	a	h	a	b	a	h	b	h	a	h	b
Block48922	Chr.6	35770494	35786111	h	a	h	a	a	b	a	b	a	a	b	b	h	a	h	a	b	h	h	h	a	h	a	a	a	h	a	b	b	h	h	h	b	a	b	a	h	a	b	a	h	b	h	a	h	b
Block48927	Chr.6	35792315	35804398	h	a	h	a	a	b	a	b	a	a	b	b	h	a	h	a	b	h	h	h	a	h	a	a	a	h	a	b	b	h	h	h	b	a	b	a	h	a	b	a	h	b	h	a	h	b
Block48932	Chr.6	35809708	35816005	h	a	h	a	a	b	a	b	a	a	b	b	h	a	h	a	b	h	h	h	a	h	a	a	a	h	a	b	b	h	h	a	b	a	b	a	h	a	b	a	h	b	h	a	a	b
Block48957	Chr.6	35845240	35851713	h	a	h	a	a	b	a	b	a	a	b	b	h	a	h	a	b	h	h	h	a	h	a	a	a	h	a	b	b	h	h	a	b	a	b	a	h	a	b	a	h	b	h	a	a	b
Block48958	Chr.6	35852290	35859604	h	a	h	a	a	b	a	b	a	a	b	b	h	a	h	a	b	h	h	h	a	h	a	a	a	h	a	b	b	h	h	h	b	a	b	a	h	a	b	a	h	b	h	a	a	b
Block48959	Chr.6	35859800	35866965	h	a	h	a	a	b	a	b	a	a	b	b	h	a	h	a	b	h	h	h	a	h	a	a	a	h	a	b	b	h	h	h	b	a	b	a	h	a	b	a	h	b	h	a	h	b
Block48960	Chr.6	35867114	35874735	h	a	h	a	a	b	a	b	a	a	b	b	h	a	h	a	b	h	h	h	a	h	a	a	a	h	a	b	b	h	h	h	b	a	b	a	h	a	b	a	h	b	h	a	h	b
Block48961	Chr.6	35875133	35894905	h	a	h	a	a	b	a	b	a	a	b	b	h	a	h	a	b	h	h	h	a	h	a	a	a	h	a	b	b	h	h	h	b	a	b	a	h	a	b	a	h	b	h	a	h	b
Block48963	Chr.6	35896923	35906745	h	a	h	a	a	b	a	b	a	a	b	b	h	a	h	a	b	h	h	h	a	h	a	a	a	h	a	b	b	h	h	h	b	a	b	a	h	a	b	a	h	b	h	a	h	b
Block48965	Chr.6	35908512	35917895	h	a	h	a	a	b	a	b	a	a	b	b	h	a	h	a	b	h	h	h	a	a	a	a	a	h	a	b	b	h	h	h	b	a	b	a	h	a	b	a	h	b	h	a	h	b
Block48998	Chr.6	35932567	35937708	h	a	a	a	a	b	a	b	a	a	b	b	h	a	h	a	b	h	h	h	a	h	a	a	a	h	a	b	b	h	h	h	b	a	b	a	h	a	b	a	h	b	h	a	h	b
Block49003	Chr.6	35941098	35954623	h	a	h	a	a	b	a	b	a	a	b	b	h	a	h	a	b	h	h	h	a	h	a	a	a	h	a	b	b	h	h	h	b	a	h	a	h	a	b	a	h	b	h	a	h	b
Block49006	Chr.6	35957508	35980469	h	a	h	a	a	b	a	b	a	a	b	b	h	a	h	a	b	h	h	h	a	h	a	a	a	h	a	b	b	h	h	h	b	a	b	a	h	a	b	a	h	b	h	a	h	b
Block49007	Chr.6	35980563	36014322	h	a	h	a	a	b	a	b	h	b	h	h	b	h	a	b	a	h	a	h	a	b	h	b	b	h	h	h	h	a	h	a	h	b	h	h	h	h	h	h	b	b	h	a	a	a
Block49008	Chr.7	170399	177584	h	h	h	a	h	b	h	b	h	b	h	h	b	h	a	b	a	h	a	h	a	b	h	b	b	h	h	h	h	a	h	a	h	b	h	h	h	h	h	h	b	b	h	a	a	a
Block49023	Chr.7	192556	201079	h	h	h	a	h	b	h	b	h	b	h	h	b	h	a	b	a	h	a	h	a	b	h	b	b	h	h	h	h	a	h	a	h	b	h	h	h	h	h	h	b	h	h	a	a	a
Block49027	Chr.7	207108	216588	h	h	h	a	h	b	h	b	h	b	h	h	b	h	a	b	a	h	a	h	a	b	h	b	b	h	h	h	h	a	h	a	h	b	h	h	h	h	h	h	b	h	h	a	a	a
Block49029	Chr.7	217778	224629	h	h	h	a	h	b	h	b	h	b	h	h	b	h	a	b	a	h	a	h	a	b	h	b	b	h	h	h	h	a	b	a	h	b	h	h	h	h	h	h	b	h	h	a	a	a
Block49035	Chr.7	235333	241792	h	h	h	a	h	b	h	b	h	b	h	h	b	h	a	b	a	h	a	h	a	b	h	b	b	h	h	h	h	a	h	a	h	b	h	h	h	h	h	h	b	h	h	a	a	a
Block49038	Chr.7	247617	253394	h	h	h	a	h	b	h	b	h	b	h	h	b	h	a	b	a	h	a	h	a	b	h	b	b	h	h	h	h	a	h	a	h	b	h	h	h	h	h	h	b	h	h	a	a	a
Block49039	Chr.7	253489	261406	h	h	h	a	h	b	h	b	h	b	h	h	b	h	a	b	a	h	a	h	a	b	h	b	b	h	h	h	h	a	h	a	h	b	h	h	h	h	h	h	b	h	h	a	a	a
Block49042	Chr.7	266277	284408	h	h	h	a	h	b	h	b	h	b	h	h	b	h	a	b	a	h	a	h	a	b	h	b	b	h	h	h	h	a	h	a	h	b	h	h	h	h	h	h	b	h	h	a	a	a
Block49043	Chr.7	285077	301297	h	h	h	a	h	b	h	b	h	b	h	h	b	h	a	b	a	h	a	h	a	b	h	b	b	h	h	h	h	a	h	a	h	b	h	h	h	h	h	h	b	h	h	a	a	a
Block49048	Chr.7	305553	312909	h	h	h	a	h	b	h	b	h	b	h	h	b	h	a	b	a	h	a	h	a	b	h	b	b	h	h	h	h	a	h	a	h	b	h	h	h	h	h	h	b	h	h	a	a	a
Block49056	Chr.7	327956	365222	h	h	h	a	h	b	h	b	h	b	h	h	b	h	a	b	a	h	a	h	a	b	h	b	b	h	h	h	h	a	h	a	h	b	h	b	h	h	h	h	b	h	h	a	a	a
Block49059	Chr.7	372906	398538	h	h	h	a	h	b	h	b	h	b	h	h	b	h	a	b	a	h	a	h	a	b	h	b	b	h	h	h	h	a	h	a	h	b	h	h	h	h	h	h	b	h	h	a	a	a
Block49062	Chr.7	403561	414601	h	h	h	a	h	b	h	b	h	b	h	h	b	h	a	b	a	h	a	h	a	b	h	b	b	h	h	h	h	a	h	a	h	b	h	h	h	h	h	h	b	h	h	a	a	a
Block49067	Chr.7	423817	442213	h	h	h	a	h	b	h	b	h	b	h	h	b	h	a	b	a	h	a	h	a	b	h	b	b	h	h	h	h	a	h	a	h	b	h	h	h	h	h	h	b	h	h	a	a	a
Block49068	Chr.7	442243	447399	h	h	h	a	h	b	h	b	h	b	h	h	b	h	a	b	a	h	a	h	a	b	h	b	b	h	h	h	h	a	h	a	h	b	h	h	h	h	h	h	b	h	h	a	a	a
Block49072	Chr.7	453029	463997	h	b	h	a	h	b	h	b	h	b	h	h	b	h	a	b	a	h	a	h	a	b	h	b	b	h	h	h	h	a	h	a	h	b	h	h	h	h	h	h	b	h	h	a	a	a
Block49073	Chr.7	464006	471746	h	b	h	a	h	b	h	b	h	b	h	h	b	h	a	b	a	h	a	h	a	b	h	b	b	h	h	h	h	a	h	a	h	b	h	h	h	h	h	h	b	b	h	a	a	a
Block49077	Chr.7	481493	501817	h	h	h	a	h	b	h	b	h	b	h	h	b	h	a	b	a	h	a	h	a	b	b	b	b	h	b	b	h	a	h	a	h	b	h	h	h	h	h	h	b	b	h	a	a	a
Block49081	Chr.7	507105	513341	h	h	h	a	h	b	h	b	h	b	h	h	b	h	a	b	a	h	a	h	a	b	h	b	b	h	h	h	h	a	h	a	h	b	h	h	h	h	h	h	b	h	h	a	a	a
Block49094	Chr.7	538296	546745	h	h	h	a	h	b	h	b	h	b	h	h	b	h	a	b	a	h	a	h	a	b	h	b	b	h	h	h	h	a	h	a	h	b	h	h	h	h	h	h	b	h	h	a	a	a
Block49098	Chr.7	549277	562032	h	h	h	a	h	b	h	b	h	b	h	h	b	h	a	b	a	h	a	h	a	b	h	b	b	h	h	b	h	a	h	a	h	b	h	h	h	h	h	h	b	h	h	a	a	a
Block49100	Chr.7	562991	570098	h	h	h	a	h	b	h	b	h	b	h	h	b	h	a	b	a	h	a	h	a	b	h	b	b	h	h	b	h	a	h	a	h	b	h	h	h	h	h	h	b	h	h	a	a	a
Block49102	Chr.7	570813	579034	h	h	h	a	h	b	h	b	h	b	h	h	b	h	a	b	a	h	a	h	a	b	h	b	b	h	h	h	h	a	h	a	h	b	h	h	h	h	h	h	b	h	h	a	a	a
Block49121	Chr.7	616440	625278	h	h	h	a	h	b	h	b	h	b	h	h	b	h	a	b	a	h	a	h	a	b	h	b	b	h	h	h	h	a	h	a	h	b	h	h	h	h	h	h	b	h	h	a	a	a
Block49124	Chr.7	625487	631406	h	h	h	a	h	b	h	b	h	b	h	h	b	h	a	b	a	h	a	h	a	b	h	b	b	h	h	h	h	a	h	a	h	b	h	h	h	h	h	h	b	h	h	a	a	a
Block49130	Chr.7	675086	680521	h	h	h	a	h	b	h	b	h	b	h	h	b	h	a	b	a	h	a	h	a	b	h	b	b	h	h	h	h	a	h	a	h	b	h	h	h	h	h	h	b	h	h	a	a	a
Block49134	Chr.7	690094	701938	h	h	h	a	h	b	h	b	h	b	h	h	b	h	a	b	a	h	a	h	a	b	h	b	b	h	h	h	h	a	h	a	h	b	h	h	h	h	h	h	b	h	h	a	a	a
Block49136	Chr.7	704854	712599	h	h	h	a	h	b	h	b	h	b	h	h	b	h	a	b	a	h	a	h	a	b	h	b	b	h	h	h	h	a	h	a	h	b	h	h	h	h	h	h	b	h	h	a	a	a
Block49138	Chr.7	713161	762809	h	h	h	a	h	b	h	b	h	b	h	h	b	h	a	b	a	h	a	h	a	b	h	b	b	h	h	h	h	a	h	a	h	b	h	h	h	h	h	h	b	h	h	a	a	a
Block49139	Chr.7	762829	769829	h	h	h	a	h	b	h	b	h	b	h	h	b	h	a	b	a	h	a	h	a	b	h	b	b	h	h	h	h	a	h	a	h	b	h	h	h	h	h	h	b	h	h	a	a	a
Block49145	Chr.7	772945	784461	h	h	h	a	h	b	h	b	h	b	h	h	b	h	a	b	a	h	a	h	a	b	h	b	b	h	h	h	h	a	h	a	h	b	h	h	h	h	h	h	b	h	h	a	a	a
Block49146	Chr.7	784541	793261	h	h	h	a	h	b	h	b	h	b	h	h	b	h	a	b	a	h	a	h	a	b	h	b	b	h	h	h	h	a	h	a	h	b	h	h	h	h	h	h	b	h	h	a	a	a
Block49152	Chr.7	962549	978598	h	h	h	a	h	b	h	b	h	b	h	h	b	h	a	b	a	h	a	h	a	b	h	b	b	h	h	h	h	a	h	a	h	b	h	h	h	h	h	h	b	h	h	a	a	a
Block49153	Chr.7	980395	998809	h	h	h	a	h	b	h	b	h	b	h	h	b	h	a	b	a	h	a	h	a	b	h	b	b	h	h	h	h	a	h	a	h	b	h	h	h	h	h	h	b	h	h	a	a	a
Block49154	Chr.7	998849	1005011	h	h	h	a	h	b	h	b	h	b	h	h	b	h	a	b	a	h	a	h	a	b	h	b	b	h	h	h	h	a	h	a	h	b	h	h	h	h	h	h	b	h	h	a	a	a
Block49156	Chr.7	1005283	1012991	h	h	h	a	h	b	h	b	h	b	h	h	b	h	a	b	a	h	a	h	a	b	h	b	b	h	h	h	h	a	h	a	h	b	h	h	h	h	h	h	b	h	h	a	a	a
Block49159	Chr.7	1014250	1025871	h	h	h	a	h	b	h	b	h	b	h	h	b	h	a	b	a	h	a	h	a	b	h	b	b	h	h	h	h	a	h	a	h	b	h	h	h	h	h	h	b	h	h	a	a	a
Block49164	Chr.7	1032580	1042532	h	h	h	a	h	b	h	b	h	b	h	h	b	h	a	b	a	h	a	h	a	b	h	b	b	h	h	h	h	a	h	a	h	b	h	h	h	h	h	h	b	h	h	a	a	a
Block49170	Chr.7	1052523	1062619	h	h	h	a	h	b	h	b	h	b	h	h	b	h	a	b	a	h	a	h	a	b	h	b	b	h	h	h	h	a	h	a	h	b	h	h	h	h	h	h	b	h	h	a	a	a
Block49173	Chr.7	1064544	1075530	h	h	h	a	h	b	h	b	h	b	h	h	b	h	a	b	a	h	a	h	a	b	h	b	b	h	h	h	h	a	h	a	h	b	h	h	h	h	h	h	b	h	h	a	a	a
Block49179	Chr.7	1085653	1104613	h	h	h	a	h	b	h	b	h	b	h	h	b	h	a	b	a	h	a	h	a	b	h	b	b	h	h	h	h	a	h	a	h	b	h	h	h	h	h	h	b	h	h	a	a	a
Block49181	Chr.7	1106014	1119875	h	h	h	a	h	b	h	b	h	b	h	h	b	h	a	b	a	h	a	h	a	b	h	b	b	h	h	h	h	a	h	a	h	b	h	h	h	h	h	h	b	h	h	a	a	a
Block49182	Chr.7	1119978	1126559	h	h	h	a	h	b	h	b	h	b	h	h	b	h	a	b	a	h	a	h	a	b	h	b	b	h	h	h	h	a	h	a	h	b	h	h	h	h	h	h	b	h	h	a	a	a
Block49194	Chr.7	1135668	1142307	h	h	h	a	h	b	h	b	h	b	h	h	b	h	a	b	a	h	a	h	a	b	h	b	b	h	h	h	h	a	h	a	h	b	h	h	h	h	h	h	b	h	h	a	a	a
Block49196	Chr.7	1142397	1148170	h	h	h	a	h	b	h	b	h	b	h	h	b	h	a	b	a	h	a	h	a	b	h	b	b	h	h	h	h	a	h	a	h	b	h	h	h	h	h	h	b	h	h	a	a	a
Block49197	Chr.7	1149796	1158136	h	h	h	a	h	b	h	b	h	b	h	h	b	h	a	b	a	h	a	h	a	b	h	b	b	h	h	h	h	a	h	a	h	b	h	h	h	h	h	h	b	h	h	a	a	a
Block49204	Chr.7	1170625	1177678	h	h	h	a	h	b	h	b	h	b	h	h	b	h	a	b	a	h	a	h	a	b	h	b	b	h	h	h	h	a	h	a	h	b	h	h	h	h	h	h	b	h	h	a	a	a
Block49212	Chr.7	1189679	1199183	h	h	h	a	h	b	h	b	h	b	h	h	b	h	a	b	a	h	a	h	a	b	h	b	b	h	h	h	h	a	h	a	h	b	h	h	h	h	h	h	b	h	h	a	a	a
Block49213	Chr.7	1199333	1252386	h	h	h	a	h	b	h	b	h	b	h	h	b	h	a	b	a	h	a	h	a	b	h	b	b	h	h	h	h	a	h	a	h	b	h	h	h	h	h	h	b	h	h	a	a	a
Block49237	Chr.7	1270564	1297222	h	h	h	a	h	b	h	b	h	b	h	h	b	h	a	b	a	h	a	h	a	b	h	b	b	h	h	h	h	a	h	a	h	b	h	h	h	h	h	h	b	h	h	a	a	a
Block49238	Chr.7	1297264	1306117	h	h	h	a	h	b	a	b	h	b	h	h	b	h	a	b	a	h	a	h	a	b	h	b	b	h	h	h	h	a	h	a	h	b	h	h	h	h	h	h	b	h	h	a	a	a
Block49239	Chr.7	1306128	1411347	h	h	h	a	h	b	h	b	h	b	h	h	b	h	a	b	a	h	a	h	a	b	h	b	b	h	h	h	h	a	h	a	h	b	h	h	h	h	h	h	b	h	h	a	a	a
Block49252	Chr.7	1428971	1452226	h	h	h	a	h	b	h	b	h	b	h	h	b	h	a	b	a	h	a	h	a	b	h	b	b	h	h	h	h	a	h	a	h	b	h	h	h	h	h	h	b	h	h	a	a	a
Block49257	Chr.7	1482865	1558108	h	h	h	a	h	b	h	b	h	b	h	h	b	h	a	b	a	h	a	h	a	b	h	b	b	h	h	h	h	a	h	a	h	b	h	h	h	h	h	h	b	h	h	a	a	a
Block49264	Chr.7	1563930	1597402	h	h	h	a	h	b	h	b	h	b	h	h	b	h	a	b	a	h	a	h	a	b	h	b	b	h	h	h	h	a	h	a	h	b	h	h	h	h	h	h	b	h	h	a	a	a
Block49266	Chr.7	1618918	1666036	h	h	h	a	h	b	h	b	h	b	h	h	b	h	a	b	a	h	a	h	a	b	h	b	b	h	h	h	h	a	h	a	h	b	h	h	h	h	h	h	b	h	h	a	a	a
Block49268	Chr.7	1671902	1719445	h	h	h	a	h	b	h	b	h	b	h	h	b	h	a	b	a	h	a	h	a	b	h	b	b	h	h	h	h	a	h	a	h	b	h	h	h	h	h	h	b	h	h	a	a	a
Block49269	Chr.7	1723030	1810320	h	h	h	a	h	b	h	b	h	b	h	h	b	h	a	b	a	h	a	h	a	b	h	b	b	h	h	h	h	a	h	a	h	b	h	h	h	h	h	h	b	h	h	a	a	a
Block49270	Chr.7	1810905	1818864	h	h	h	a	h	b	h	b	h	b	h	h	b	h	a	b	a	h	a	h	a	b	h	b	b	h	h	h	h	a	h	a	h	b	h	h	h	h	h	h	b	h	h	a	a	a
Block49273	Chr.7	1821143	1828695	h	h	h	a	h	b	h	b	h	b	h	h	b	h	a	b	a	h	a	h	a	b	h	b	b	h	h	h	h	a	h	a	h	b	h	h	h	h	h	h	b	h	h	a	a	a
Block49278	Chr.7	1829859	1840292	h	h	h	a	h	b	h	b	h	b	h	h	b	h	a	b	a	h	a	h	a	b	h	b	b	h	h	h	h	a	h	a	h	b	h	h	h	h	h	h	b	h	h	a	a	a
Block49287	Chr.7	1851722	1937533	h	h	h	a	h	b	h	b	h	b	h	h	b	h	a	b	a	h	a	h	a	b	h	b	b	h	h	h	h	a	h	a	h	b	h	h	h	h	h	h	b	h	h	a	a	a
Block49290	Chr.7	1943008	1948390	h	h	h	a	h	b	h	b	h	b	h	h	b	h	a	b	a	h	a	h	a	b	h	b	b	h	h	h	h	a	h	a	h	b	h	h	h	h	h	h	b	h	h	a	a	a
Block49294	Chr.7	1949905	1956000	h	h	h	a	h	b	h	b	h	b	h	h	b	h	a	b	a	h	a	h	a	b	h	b	b	h	h	h	h	a	h	a	h	b	h	h	h	h	h	h	b	h	h	a	a	a
Block49297	Chr.7	1957209	1962746	h	h	h	a	h	b	h	b	h	b	h	h	b	h	a	b	a	h	a	h	a	b	h	b	b	h	h	h	h	a	h	a	h	b	h	h	h	h	h	h	b	h	h	a	a	a
Block49299	Chr.7	1965261	1974252	h	h	h	a	h	b	h	b	h	b	h	h	b	h	a	b	a	h	a	h	a	b	h	b	b	h	h	h	h	a	h	a	h	b	h	h	h	h	h	h	b	h	h	a	a	a
Block49307	Chr.7	1978676	2001718	h	h	h	a	h	b	h	b	h	b	h	h	b	h	a	b	a	h	a	h	a	b	h	b	b	h	h	h	h	a	h	a	h	b	h	h	h	h	h	h	b	h	h	a	a	a
Block49332	Chr.7	2027274	2046636	h	h	h	a	h	b	h	b	h	b	h	h	b	h	a	b	a	h	a	h	a	b	h	b	b	h	h	h	h	a	h	a	h	b	h	h	h	h	h	h	b	h	h	a	a	a
Block49335	Chr.7	2050754	2077271	h	h	h	a	h	b	h	b	h	b	h	h	b	h	a	b	a	h	a	h	a	b	h	b	b	h	h	h	h	a	h	a	h	b	h	h	h	h	h	h	b	h	h	a	a	a
Block49336	Chr.7	2082474	2091862	h	h	h	a	h	b	h	b	h	b	h	h	b	h	a	b	a	h	a	h	a	b	h	b	b	h	h	h	h	a	h	a	h	b	h	h	h	h	h	h	b	h	h	a	a	a
Block49340	Chr.7	2133018	2167023	h	h	h	a	h	b	h	b	h	b	h	h	b	h	a	b	a	h	a	h	a	b	h	b	b	h	h	h	h	a	h	a	h	b	h	h	h	h	h	h	b	h	h	a	a	a
Block49341	Chr.7	2171606	2236111	h	h	h	a	h	b	h	b	h	b	h	h	b	h	a	b	a	h	a	h	a	b	h	b	b	h	h	h	h	a	h	a	h	b	h	h	h	h	h	h	b	h	h	a	a	a
Block49342	Chr.7	2253915	2393162	h	h	h	a	h	b	h	b	h	b	h	h	b	h	a	b	a	h	a	h	a	b	h	b	b	h	h	h	h	a	h	a	h	b	h	h	h	h	h	h	b	h	h	a	a	a
Block49343	Chr.7	2398788	2461297	h	h	h	a	h	b	h	b	h	b	h	h	b	h	a	b	a	h	a	h	a	b	h	b	b	h	h	h	h	a	h	a	h	b	h	h	h	h	h	h	b	h	h	a	a	a
Block49345	Chr.7	2492662	2505901	h	h	h	a	h	b	h	b	h	b	h	h	b	h	a	b	a	h	a	h	a	b	h	b	b	h	h	h	h	a	h	a	h	b	h	h	h	h	h	h	b	h	h	a	a	a
Block49348	Chr.7	2514791	2527908	h	h	h	a	h	b	h	b	h	b	h	h	b	h	a	b	a	h	a	h	a	b	h	b	b	h	h	h	h	a	h	a	h	b	h	h	h	h	h	h	b	h	h	a	a	a
Block49350	Chr.7	2534900	2619903	h	h	h	a	h	b	h	b	h	b	h	h	b	h	a	b	a	h	a	h	a	b	h	b	b	h	h	h	h	a	h	a	h	b	h	h	h	h	h	h	b	h	h	a	a	a
Block49351	Chr.7	2622108	2628798	h	h	h	a	h	b	h	b	h	b	h	h	b	h	a	b	a	h	a	h	a	b	h	b	b	h	h	h	h	a	h	a	h	b	h	h	h	h	h	h	b	h	h	a	a	a
Block49352	Chr.7	2628821	2709193	h	h	h	a	h	b	h	b	h	b	h	h	b	h	a	b	a	h	a	h	a	b	h	b	b	h	h	h	h	a	h	a	h	b	h	h	h	h	h	h	b	h	h	a	a	a
Block49376	Chr.7	2725397	2750526	h	h	h	a	h	b	h	b	h	b	h	h	b	h	a	b	a	h	a	h	a	b	h	b	b	h	h	h	h	a	h	a	h	b	h	h	h	h	h	h	b	h	h	a	a	a
Block49378	Chr.7	2751166	2758747	h	h	h	a	h	b	h	b	a	b	h	h	b	h	a	b	a	h	a	h	a	b	h	b	b	h	h	h	h	a	h	a	h	b	h	h	h	h	h	h	b	h	h	a	a	a
Block49398	Chr.7	2776606	2784238	h	a	h	a	h	b	h	b	h	b	h	h	b	h	a	b	a	h	a	h	a	b	h	b	b	h	h	h	h	a	h	a	h	b	h	h	h	h	h	h	b	h	h	a	a	a
Block49402	Chr.7	2787297	2795861	h	h	h	a	h	b	h	b	h	b	h	h	b	h	a	b	a	h	a	h	a	b	h	b	b	h	h	h	h	a	h	a	h	b	h	h	h	h	h	h	b	h	h	a	a	a
Block49405	Chr.7	2801097	2808609	h	h	h	a	h	b	h	b	h	b	h	h	b	h	a	b	a	h	a	h	a	b	h	b	b	h	h	h	h	a	h	a	h	b	h	h	h	h	h	h	b	h	h	a	a	a
Block49406	Chr.7	2808726	2833226	h	h	h	a	h	b	h	b	h	b	h	h	b	h	a	b	a	h	a	h	a	b	h	b	b	h	h	h	h	a	h	a	h	b	h	a	h	h	h	h	b	h	h	a	a	a
Block49408	Chr.7	2835318	2842490	h	h	h	a	h	b	h	b	h	b	h	h	b	h	a	b	a	h	a	h	a	b	h	b	b	h	a	h	h	a	h	a	h	b	h	h	h	h	h	h	b	h	h	a	a	a
Block49413	Chr.7	2849592	2855849	h	h	h	a	h	b	h	b	h	b	h	h	b	h	a	b	a	h	a	h	a	b	h	b	b	h	h	h	h	a	h	a	h	b	h	h	h	h	h	h	b	h	h	a	a	a
Block49417	Chr.7	2859806	2879215	h	h	h	a	h	b	h	b	h	b	h	h	b	h	a	b	a	h	a	h	a	b	h	b	b	h	h	h	h	a	h	a	h	b	h	h	h	h	h	h	b	h	h	a	a	a
Block49418	Chr.7	2879269	2891291	h	h	h	a	h	b	h	b	h	b	h	h	b	h	a	b	a	h	a	h	a	b	h	b	b	h	h	h	h	a	h	a	h	b	h	h	h	h	h	h	b	h	h	a	a	a
Block49424	Chr.7	2901552	2926040	h	h	h	a	h	b	h	b	h	h	h	h	b	h	a	b	a	h	a	h	a	b	a	b	b	h	h	h	h	a	h	a	h	b	h	h	h	h	h	h	b	h	h	a	a	a
Block49427	Chr.7	2928789	2938678	h	h	h	a	h	b	h	b	h	h	h	h	b	h	a	b	a	h	a	h	a	b	a	b	b	h	h	h	h	a	h	a	h	b	h	h	h	h	h	h	b	h	h	a	a	a
Block49430	Chr.7	2939659	2945599	h	h	h	a	h	b	h	h	h	h	h	h	h	h	a	b	a	h	a	h	a	h	h	h	h	h	h	h	h	a	h	a	h	h	h	a	h	h	a	h	h	a	b	a	a	a
Block49873	Chr.7	3266200	3272852	h	h	h	a	h	h	h	h	h	b	h	h	h	h	a	b	a	h	a	h	a	b	h	h	b	h	h	h	h	a	h	a	h	b	h	h	h	h	h	h	b	h	h	a	a	a
Block51831	Chr.7	11116015	11140225	h	h	b	a	h	b	h	b	h	b	h	h	b	h	a	b	a	h	a	h	a	b	h	b	b	h	h	h	h	a	h	a	h	b	h	h	h	h	h	h	b	h	h	a	a	a
Block51869	Chr.7	11180023	11198268	h	h	b	a	h	b	h	b	h	b	h	h	b	h	a	b	a	h	a	h	a	b	h	b	b	h	h	h	h	a	h	a	h	b	h	h	h	h	h	h	b	h	h	a	a	a
Block51871	Chr.7	11203109	11219186	h	h	b	a	h	b	h	b	h	b	h	h	b	h	a	b	a	h	a	h	a	b	h	b	b	h	h	h	h	a	h	a	h	b	h	h	h	h	h	h	b	h	h	a	a	a
Block51875	Chr.7	11226313	11353103	h	h	b	a	h	b	h	b	h	b	h	h	b	h	a	b	a	h	a	h	a	b	h	b	b	h	h	h	h	a	h	a	h	b	h	h	h	h	h	h	b	h	h	a	a	a
Block51876	Chr.7	11353286	11367609	h	h	b	a	h	b	h	b	h	b	h	h	b	h	a	b	a	h	a	h	a	b	h	b	b	h	h	h	h	a	h	a	h	b	h	h	a	h	h	h	b	h	h	a	a	a
Block51877	Chr.7	11367779	11372983	h	h	b	a	h	b	h	b	h	b	h	h	b	h	a	b	a	h	a	h	a	b	h	b	b	h	h	h	h	a	h	a	h	b	h	h	h	h	h	h	b	h	h	a	a	a
Block51885	Chr.7	11383586	11398912	h	h	b	a	h	b	h	b	h	b	h	h	b	h	a	b	a	h	a	h	a	b	h	b	b	h	h	h	h	a	h	a	h	b	h	h	h	h	h	h	b	h	h	a	a	a
Block51888	Chr.7	11404353	11413116	h	h	b	a	h	b	h	b	h	b	h	h	b	h	a	b	a	h	a	h	a	b	h	b	b	h	h	h	h	a	h	a	h	b	h	h	h	h	h	h	b	h	h	a	a	a
Block51889	Chr.7	11413151	11423984	h	h	b	a	h	b	h	b	h	b	h	h	b	h	a	b	a	h	a	h	a	b	h	b	b	h	h	h	h	a	h	a	h	b	h	h	h	h	h	h	b	b	h	a	a	a
Block51892	Chr.7	11433044	11438489	h	h	b	a	h	b	h	b	h	b	h	h	b	h	a	b	a	h	a	h	a	b	h	b	b	h	h	h	h	a	h	a	h	b	h	h	h	h	h	h	b	h	h	a	a	a
Block51902	Chr.7	11449635	11456281	h	h	b	a	h	b	h	b	h	b	h	h	b	h	a	b	a	h	a	h	a	b	h	b	b	h	h	h	h	a	h	a	h	b	h	h	h	h	h	h	b	h	h	a	a	a
Block51904	Chr.7	11459185	11464751	h	h	b	a	h	b	h	b	h	b	h	h	b	h	a	b	a	h	a	h	a	b	h	b	b	h	h	h	h	a	h	a	h	b	h	h	h	h	h	h	b	h	h	a	a	a
Block51905	Chr.7	11464837	11480306	h	h	b	a	h	b	h	b	h	b	h	h	b	h	a	b	a	h	a	h	a	b	h	b	b	h	h	h	h	a	h	a	h	b	h	h	h	h	h	h	b	h	h	a	a	a
Block51906	Chr.7	11480573	11491026	h	h	b	a	h	b	h	b	h	b	h	h	b	h	a	b	a	h	a	h	a	b	h	b	b	h	h	h	h	a	h	a	h	b	h	h	h	h	h	h	h	h	h	a	a	a
Block51919	Chr.7	11509380	11522257	h	h	b	a	h	b	h	b	h	b	h	h	b	h	a	b	a	h	a	h	a	b	h	b	b	h	h	h	h	a	h	a	h	b	h	h	h	h	h	h	b	h	h	a	a	a
Block51922	Chr.7	11527987	11547243	h	h	b	a	h	b	h	b	h	b	h	h	b	h	a	b	a	h	a	h	a	b	h	b	b	h	h	h	h	a	h	a	h	b	h	h	h	h	h	h	h	h	h	a	a	a
Block51923	Chr.7	11547273	11558376	h	h	b	a	h	b	h	b	h	b	h	h	b	h	a	b	a	h	a	h	a	b	h	b	b	h	h	h	h	a	h	a	h	b	h	h	h	h	h	h	b	h	h	a	a	a
Block51925	Chr.7	11560519	11613209	h	h	b	a	h	b	h	b	h	b	h	h	b	h	a	b	a	h	a	h	a	b	h	b	b	h	h	h	h	a	h	a	h	b	h	h	h	h	h	h	b	h	h	a	a	a
Block51931	Chr.7	11625680	11633647	h	h	b	a	h	b	h	b	h	b	h	h	b	h	a	b	a	h	a	h	a	b	h	b	b	h	h	h	h	a	h	a	h	h	h	h	h	h	h	h	b	h	h	a	a	a
Block51934	Chr.7	11635044	11678010	h	h	b	a	h	b	h	b	h	b	h	h	b	h	a	b	a	h	a	h	a	b	h	b	b	h	h	h	h	a	h	a	h	b	h	h	h	h	h	h	b	h	h	a	a	a
Block51937	Chr.7	11678293	11688359	h	h	b	a	h	b	h	b	h	b	h	h	b	h	a	b	a	h	a	h	a	b	h	b	b	h	h	h	h	a	h	a	h	b	h	h	h	h	h	h	b	h	h	a	a	a
Block51938	Chr.7	11688427	11694845	h	h	b	a	h	b	h	h	h	b	h	h	b	h	a	b	a	h	a	h	a	b	h	b	b	h	h	h	h	a	h	a	h	b	h	h	h	h	h	h	h	h	h	a	a	a
Block51941	Chr.7	11695081	11704600	h	h	b	a	h	b	h	b	h	b	h	h	b	h	a	b	a	h	a	h	a	b	h	b	b	h	h	h	h	a	h	a	h	b	h	h	h	h	h	h	b	h	h	a	a	a
Block51947	Chr.7	11715705	11735011	h	h	b	a	h	b	h	b	h	b	h	h	b	h	a	b	a	h	a	h	a	b	h	b	b	h	h	h	h	a	h	a	h	b	h	h	h	h	h	h	b	h	h	a	a	a
Block51963	Chr.7	11747716	11753584	h	h	b	a	h	b	h	b	h	b	h	h	b	h	a	b	a	h	a	h	a	b	h	b	b	h	h	h	h	a	h	a	h	b	h	h	h	h	h	h	b	h	h	a	a	a
Block51968	Chr.7	11761404	11780678	h	h	b	a	h	b	h	b	h	b	h	h	b	h	a	b	a	h	a	h	a	b	h	b	b	h	h	h	h	a	h	a	h	b	h	h	h	h	h	h	b	h	h	a	a	a
Block51969	Chr.7	11780832	11788813	h	h	b	a	h	b	h	b	h	b	h	h	b	h	a	b	a	h	a	h	a	b	h	b	b	h	h	h	h	a	h	a	h	b	h	h	h	h	h	h	b	h	h	a	a	a
Block52029	Chr.7	11840119	11848711	h	b	b	a	h	b	h	b	h	b	h	h	b	h	a	b	a	h	a	h	a	b	h	b	b	h	h	h	h	a	h	a	h	b	h	h	h	h	h	h	b	b	h	a	a	a
Block52044	Chr.7	11875356	11884427	h	h	b	a	h	b	h	b	h	b	h	h	b	h	a	b	a	h	a	h	a	b	h	b	b	h	h	h	h	a	h	a	h	b	h	h	h	h	h	h	b	h	h	a	a	a
Block52052	Chr.7	11895916	11907055	h	h	b	a	h	b	h	b	h	b	h	h	b	h	a	b	a	h	a	h	a	b	h	b	b	h	h	h	h	a	h	a	b	b	h	h	h	h	h	h	b	h	h	a	a	a
Block52054	Chr.7	11910788	11918570	h	h	b	a	h	b	h	b	b	b	h	h	b	h	a	b	a	h	a	h	a	b	h	b	b	h	h	h	h	a	h	a	h	b	h	h	h	h	h	h	b	h	h	a	a	a
Block52063	Chr.7	11927943	11933238	h	h	b	a	h	b	h	b	h	b	h	h	b	h	a	b	a	h	a	h	a	b	h	b	h	h	h	h	h	a	h	a	h	b	h	h	h	h	h	h	b	h	h	a	a	a
Block52171	Chr.7	12017141	12022218	h	h	b	a	h	b	h	b	h	b	h	h	b	b	a	b	a	h	a	h	a	b	h	b	b	h	h	h	h	h	h	a	h	h	h	h	h	h	h	h	b	h	h	a	a	a
Block53532	Chr.7	14079582	14086921	h	h	b	a	h	b	h	b	a	b	h	h	b	b	h	b	a	a	a	h	a	b	h	b	b	b	h	h	a	h	a	a	h	b	h	h	h	h	h	h	b	h	h	a	a	a
Block54557	Chr.7	17077466	17084189	h	h	b	a	h	b	a	b	a	b	h	h	a	b	h	a	h	b	a	a	h	b	h	a	b	b	h	h	h	h	a	a	h	a	a	a	b	h	a	h	h	a	b	a	b	a
Block55164	Chr.7	18580114	18587582	a	h	b	h	h	b	b	b	h	b	h	h	a	b	h	h	h	b	h	a	h	b	h	a	b	b	h	h	h	h	a	a	h	h	a	a	b	h	a	h	h	a	b	a	b	a
Block55366	Chr.7	19116628	19125254	a	h	b	h	h	b	b	b	h	b	h	h	a	b	h	h	h	b	a	a	h	b	h	a	b	b	h	h	h	h	a	a	h	h	a	a	b	h	a	h	h	a	b	a	b	a
Block55367	Chr.7	19125378	19131312	a	h	b	h	h	b	b	b	h	b	h	h	a	b	h	h	h	b	a	a	h	b	h	a	b	b	h	h	h	h	a	a	h	h	a	a	b	h	a	h	h	a	b	a	b	a
Block55368	Chr.7	19131553	19139157	a	h	b	h	h	b	b	b	a	b	h	a	a	b	h	h	h	b	h	a	h	b	a	a	b	b	h	h	h	h	a	a	h	h	a	a	b	h	a	h	h	a	b	a	b	a
Block55437	Chr.7	19182723	19187906	a	h	b	h	h	b	b	b	h	b	h	h	a	b	h	h	h	b	h	a	h	b	h	a	b	b	h	h	h	h	a	a	h	h	a	a	b	h	a	h	h	a	b	a	b	a
Block55534	Chr.7	19281362	19287882	a	h	b	h	h	b	b	b	h	b	h	h	a	b	h	h	h	b	h	a	h	b	h	a	b	b	h	a	h	h	a	a	h	h	a	a	b	h	a	h	h	a	b	a	b	a
Block55561	Chr.7	19325920	19331429	a	a	b	h	h	b	b	b	h	b	h	h	a	b	h	a	a	b	a	a	h	b	h	a	b	b	h	h	h	h	a	a	h	h	a	a	b	a	a	h	h	a	b	a	b	a
Block55585	Chr.7	19352132	19357731	a	h	b	h	h	b	b	b	h	b	h	h	a	b	h	h	h	b	h	a	h	b	h	a	b	b	a	h	h	h	a	a	h	a	a	a	b	h	a	a	h	a	b	a	b	a
Block55693	Chr.7	19434265	19443461	a	h	b	h	h	b	b	b	h	b	h	h	a	b	h	h	h	b	h	a	h	b	h	a	b	b	h	h	h	h	a	a	h	h	a	a	b	h	a	a	h	a	b	a	b	a
Block55702	Chr.7	19453252	19467970	a	h	b	h	h	b	b	b	h	b	h	h	a	b	h	h	h	b	h	a	h	b	h	a	b	b	h	h	h	a	a	a	h	h	a	a	b	h	a	a	h	a	b	a	b	a
Block55732	Chr.7	19488685	19495088	a	h	b	h	h	b	b	b	h	b	h	h	a	b	h	a	a	b	h	a	h	b	h	a	b	b	a	h	h	h	a	a	a	h	a	a	b	h	a	h	h	a	b	a	b	a
Block55772	Chr.7	19510919	19517752	a	h	b	h	h	b	b	b	h	b	h	h	a	b	b	h	h	b	h	h	h	b	h	a	b	h	h	h	h	h	a	a	h	a	a	a	h	h	a	b	h	a	b	a	b	a
Block55874	Chr.7	19861096	19971349	a	a	h	h	h	b	b	b	h	b	b	b	a	b	b	a	h	b	h	h	h	b	h	a	b	h	h	h	h	h	a	a	h	h	a	a	b	b	a	b	h	a	b	a	b	a
Block56352	Chr.7	20326636	20335010	h	a	b	h	h	b	b	b	h	b	b	b	a	b	b	a	h	b	h	h	h	b	h	a	b	h	h	h	h	h	a	a	h	h	a	a	b	b	a	b	h	a	b	a	b	a
Block56353	Chr.7	20335037	20347892	h	a	b	h	h	b	b	b	h	b	b	b	a	b	b	a	h	b	h	h	h	b	h	a	b	h	h	h	h	h	a	a	h	h	a	a	b	b	a	b	h	a	b	a	b	a
Block56356	Chr.7	20351192	20369116	h	a	b	h	h	b	b	b	h	b	b	b	a	b	b	a	h	b	h	h	h	b	h	a	b	h	h	h	h	h	a	a	h	h	a	a	b	b	a	b	h	a	b	a	b	a
Block56359	Chr.7	20374112	20380815	a	a	b	h	h	b	b	b	h	b	b	b	a	b	b	a	h	b	h	h	h	b	h	a	b	h	h	h	h	h	a	a	h	h	a	a	b	b	a	b	h	a	b	a	b	a
Block56384	Chr.7	20406144	20416182	a	a	b	h	h	b	b	b	h	b	b	b	a	b	b	a	h	b	h	h	h	b	a	a	b	h	h	a	h	a	a	a	h	h	a	a	b	b	a	b	h	a	b	a	b	a
Block56392	Chr.7	20424716	20430767	a	a	b	h	h	b	b	b	a	b	b	b	a	b	b	a	h	b	h	h	h	b	h	a	b	h	h	h	a	h	a	a	h	h	a	a	b	b	a	b	h	a	b	a	b	a
Block56426	Chr.7	20481804	20487264	h	a	b	h	h	b	b	b	h	b	b	b	a	b	b	a	h	b	h	h	h	b	h	a	b	h	a	h	h	h	a	a	h	h	a	a	b	b	a	b	h	a	b	a	b	a
Block56441	Chr.7	20507791	20513275	h	a	b	h	h	b	b	b	h	b	b	b	a	b	b	a	h	b	h	h	h	b	h	a	b	h	a	h	h	h	a	a	h	h	a	a	b	b	a	b	h	a	b	a	b	a
Block56442	Chr.7	20513404	20521839	h	a	b	h	h	b	b	b	h	b	b	b	a	b	b	a	h	b	h	h	h	b	h	a	b	h	a	h	a	h	a	a	h	a	a	a	b	b	a	b	h	a	b	a	b	a
Block56451	Chr.7	20528383	20534130	h	a	b	h	h	b	b	b	h	b	b	b	a	b	b	a	h	b	h	h	h	b	a	a	b	h	b	h	h	h	a	a	h	h	a	a	b	b	a	b	h	a	b	a	b	a
Block56505	Chr.7	20584059	20589580	h	a	b	h	h	b	b	b	h	b	b	b	a	b	b	a	h	b	h	h	h	b	h	a	b	h	h	h	h	h	a	a	h	h	a	a	b	b	a	b	h	a	b	a	b	a
Block56609	Chr.7	20640141	20645690	h	a	b	h	h	b	b	b	h	b	b	b	a	b	b	a	h	b	h	h	h	b	h	a	b	h	h	h	h	b	a	a	h	h	a	a	b	b	a	b	h	a	b	a	b	a
Block56618	Chr.7	20655306	20665547	h	a	b	h	h	b	b	b	b	b	b	b	a	b	b	a	h	b	h	h	h	b	h	a	b	h	h	h	h	h	a	a	h	h	a	a	b	b	a	b	h	a	b	a	b	a
Block56623	Chr.7	20669072	20694204	h	a	b	h	h	b	b	b	b	b	b	b	a	b	b	a	h	b	h	h	h	b	h	a	b	h	h	h	h	h	a	a	h	h	a	a	b	b	a	b	h	a	b	a	b	a
Block56624	Chr.7	20695212	20702404	h	a	b	h	h	b	b	b	h	b	b	b	a	b	b	a	h	b	h	h	h	b	h	a	b	h	h	h	h	b	a	a	h	h	a	a	b	b	a	b	h	a	b	a	b	a
Block56645	Chr.7	20722536	20731438	h	a	b	h	h	b	b	b	h	b	b	b	a	b	b	a	h	b	h	h	h	b	h	a	b	h	h	h	h	h	a	a	h	h	a	a	b	b	a	b	h	a	b	a	b	a
Block56667	Chr.7	20758905	20764022	h	a	b	h	h	b	b	b	h	b	b	b	a	b	b	a	h	b	h	h	h	b	h	a	b	h	h	h	h	h	a	a	h	h	a	a	b	b	a	b	h	a	b	a	b	a
Block56678	Chr.7	20780479	20786995	h	a	b	h	h	b	b	b	h	b	b	b	a	b	b	a	h	b	h	h	h	b	h	a	b	h	h	h	h	h	a	a	h	h	a	a	b	b	a	b	h	a	b	a	b	a
Block56680	Chr.7	20787517	20800554	h	a	b	h	h	b	b	b	h	b	b	b	a	b	b	a	h	b	h	h	h	b	h	a	b	h	h	h	h	h	a	a	h	h	a	a	b	b	a	b	h	a	b	a	b	a
Block56683	Chr.7	20803713	20809867	h	a	b	h	h	b	b	b	h	b	b	b	a	b	b	a	h	b	h	h	h	b	h	a	b	h	h	h	h	h	a	a	h	b	a	a	b	b	a	b	h	a	b	a	b	a
Block56788	Chr.7	20867429	20875434	h	a	b	h	h	b	b	h	h	b	b	b	a	h	h	a	h	b	h	h	h	h	h	a	h	a	a	h	h	h	a	a	h	h	a	a	h	h	a	b	h	a	b	a	b	a
Block56869	Chr.7	21062257	21328246	h	a	b	a	h	h	h	h	h	b	b	b	a	h	h	a	h	b	h	h	h	h	h	a	h	a	a	h	h	h	a	a	a	h	a	a	h	h	a	b	a	a	b	a	b	a
Block56874	Chr.7	21639986	21662722	h	a	b	a	h	h	h	b	h	b	b	b	a	h	b	a	h	b	h	h	h	b	h	a	b	a	h	h	h	h	a	a	h	h	a	a	b	h	h	b	a	a	b	a	b	a
Block56899	Chr.7	21712333	21720120	h	a	b	h	h	h	b	b	h	b	b	b	a	h	b	a	h	b	h	h	h	b	h	a	b	a	h	h	h	h	a	a	h	h	a	a	b	h	h	b	a	a	b	a	b	a
Block56902	Chr.7	21720876	21734680	h	a	b	h	h	h	b	b	h	b	b	b	a	h	b	a	h	b	h	h	h	b	h	a	b	a	h	h	h	h	a	a	h	h	a	a	b	h	h	b	a	a	b	a	b	a
Block56913	Chr.7	21742595	21749074	h	a	b	h	h	h	b	b	h	b	b	b	a	h	b	a	h	b	h	h	h	b	h	a	b	a	h	h	h	h	a	a	h	h	a	a	b	h	h	b	a	a	b	a	b	a
Block56914	Chr.7	21749959	21762595	h	a	b	h	h	h	b	b	h	b	b	b	a	h	b	a	h	b	h	h	h	b	h	a	b	a	h	h	h	b	a	a	h	h	a	a	b	h	h	b	a	a	b	a	b	a
Block56975	Chr.7	21816203	21821392	h	a	b	h	h	h	b	b	h	b	b	b	a	h	b	a	h	b	h	h	h	b	h	a	b	a	h	h	h	h	a	a	h	h	a	a	b	h	h	b	a	a	b	a	b	a
Block56976	Chr.7	21821464	21829870	h	a	b	h	h	h	b	b	h	b	b	b	a	h	b	a	h	b	h	h	h	b	h	a	b	a	h	b	h	h	a	a	h	h	a	a	b	h	h	b	a	a	b	a	b	a
Block56983	Chr.7	21851565	21886659	h	a	b	h	h	h	b	b	h	b	b	b	a	h	b	a	h	b	h	h	h	b	h	a	b	a	h	h	b	h	a	a	h	h	a	a	h	h	h	b	a	a	a	a	h	h
Block57645	Chr.7	22888952	22894923	h	h	b	a	h	h	b	b	h	b	b	b	a	h	b	a	h	b	h	h	h	b	h	a	b	a	h	h	b	h	a	a	h	h	a	a	h	h	h	b	a	a	h	a	h	h
Block57698	Chr.7	22930497	22993020	h	h	b	h	h	a	b	b	h	b	b	b	a	h	b	a	h	b	h	h	h	b	h	a	b	a	h	a	b	h	a	a	h	h	a	a	a	h	h	b	a	a	h	a	h	h
Block57787	Chr.7	23022636	23029684	h	h	b	h	h	h	b	b	h	b	b	b	a	h	b	a	h	b	a	h	h	b	h	a	b	a	h	h	b	h	a	a	h	h	a	a	h	h	h	b	a	a	h	a	h	h
Block57804	Chr.7	23057478	23062870	h	h	b	a	h	h	b	b	h	b	b	b	a	h	b	a	h	b	h	h	h	b	h	a	b	a	h	h	b	h	a	a	h	h	a	a	h	h	h	b	a	a	h	a	h	h
Block57815	Chr.7	23074223	23155907	h	h	b	h	a	h	b	b	h	b	b	b	a	h	b	a	h	b	h	h	h	b	h	a	b	a	h	h	b	h	a	a	h	h	a	a	h	h	h	b	a	a	h	a	h	h
Block57817	Chr.7	23156896	23168016	h	h	b	h	a	h	b	b	h	b	b	b	a	h	b	a	h	b	h	h	h	b	h	a	b	a	h	h	b	h	a	a	h	h	a	a	h	h	h	b	a	a	h	a	h	h
Block57820	Chr.7	23172913	23230456	h	h	b	h	a	h	b	b	h	b	b	b	a	h	b	a	h	b	h	h	h	b	h	a	b	a	h	h	b	h	a	a	h	h	a	a	h	a	h	b	a	a	h	a	h	h
Block57821	Chr.7	23248993	23398304	h	h	b	h	a	h	b	b	h	b	b	b	a	h	b	a	h	b	h	h	h	b	h	a	b	a	h	h	b	h	a	a	h	h	a	a	h	a	h	b	a	a	h	a	h	h
Block57822	Chr.7	23412512	23429995	h	h	b	h	a	h	b	b	h	b	b	b	a	h	b	a	h	b	h	h	h	b	h	a	b	a	h	h	b	h	a	a	h	h	a	a	h	a	h	b	a	a	a	a	h	h
Block57823	Chr.7	23443586	23518148	h	h	b	h	a	h	b	b	h	b	b	b	a	h	b	a	h	b	h	h	h	b	h	a	b	a	h	h	b	h	a	a	h	h	a	a	h	a	h	b	a	a	a	a	h	h
Block57825	Chr.7	23544857	23590749	h	h	b	h	a	h	b	b	a	b	b	b	h	b	b	h	h	b	h	h	a	b	h	a	b	h	b	h	b	h	h	a	b	a	a	a	b	a	h	h	h	a	h	a	h	h
Block58020	Chr.7	26376274	26381935	h	h	b	h	a	h	h	b	a	b	b	b	h	h	b	h	h	b	b	h	a	b	h	a	b	h	b	h	b	h	h	a	b	a	a	a	h	a	h	h	h	a	h	a	h	h
Block58068	Chr.7	26428338	26438800	b	h	b	h	a	h	h	b	a	b	b	b	h	h	b	h	h	b	b	h	a	b	h	a	b	h	b	h	b	h	h	a	b	a	a	a	h	a	h	h	h	a	h	a	h	h
Block58070	Chr.7	26440856	26448038	b	h	b	h	a	h	h	b	a	b	b	b	h	h	b	h	h	b	h	h	a	b	h	a	b	h	b	h	b	h	h	a	b	a	a	a	h	a	h	h	h	a	h	a	h	h
Block58084	Chr.7	26459422	26475059	h	h	b	h	a	h	h	b	a	b	b	b	h	h	b	h	h	b	h	h	a	b	h	a	b	h	b	h	b	h	h	a	b	a	a	a	h	a	h	h	h	a	h	a	h	h
Block58085	Chr.7	26475932	26481864	h	h	b	h	a	h	h	b	a	b	b	b	h	h	b	h	h	b	h	h	a	b	h	a	b	h	b	h	b	h	h	a	b	a	a	a	b	a	h	h	h	a	h	a	h	h
Block58088	Chr.7	26483439	26490810	h	h	b	h	a	h	h	b	a	b	b	b	h	h	b	h	h	b	h	b	a	b	h	a	b	h	b	h	b	h	h	a	b	a	a	a	b	a	h	h	h	a	h	a	h	h
Block58089	Chr.7	26490877	26496175	h	h	b	h	a	h	h	b	a	b	b	b	h	h	b	h	b	b	h	h	a	b	h	a	b	h	b	h	b	h	h	a	b	a	a	a	h	a	h	h	h	a	h	a	h	h
Block58134	Chr.7	26534025	26546350	h	h	b	h	a	h	h	b	a	b	b	b	h	h	b	h	h	b	h	h	a	b	h	a	b	h	b	h	b	h	h	a	b	a	a	a	h	a	h	h	h	a	h	a	h	h
Block58144	Chr.7	26554581	26576009	h	h	b	h	a	h	h	a	a	b	h	h	h	h	h	h	h	b	h	h	a	b	h	a	h	h	h	h	h	h	h	a	h	a	a	a	h	a	h	h	h	a	h	a	h	h
Block58177	Chr.7	26951010	27199159	h	h	b	a	a	h	h	a	a	b	h	h	h	h	h	h	h	b	h	h	a	b	h	a	h	h	h	h	h	h	h	a	h	a	a	a	h	a	h	h	h	a	h	a	h	h
Block58178	Chr.7	27209405	27253422	h	h	b	a	a	h	h	h	a	b	h	h	h	h	h	h	h	b	h	h	a	b	h	a	h	h	h	h	h	h	h	a	h	a	a	a	h	a	h	h	h	a	h	a	h	h
Block58179	Chr.7	27286219	27403501	h	h	b	a	a	h	h	h	a	b	h	h	h	h	h	h	h	b	h	h	a	b	h	a	h	h	h	h	h	h	h	a	h	a	a	a	h	a	h	h	h	a	h	a	h	h
Block58180	Chr.7	27408676	27473229	h	h	b	a	a	h	h	h	a	b	h	h	h	h	h	h	h	b	h	h	a	b	h	a	h	h	h	h	h	h	h	a	h	a	a	a	h	a	h	h	h	a	h	a	h	h
Block58182	Chr.7	27479354	27628546	h	h	b	a	a	h	h	h	a	b	h	h	h	h	h	h	h	b	h	h	a	b	h	a	h	h	h	h	h	h	h	a	h	a	a	a	h	a	h	h	h	a	h	a	h	h
Block58184	Chr.7	27645737	27734452	h	h	b	a	a	h	h	h	a	b	h	h	h	h	h	h	h	b	h	h	a	b	h	a	h	h	h	h	h	h	h	a	h	a	a	a	h	a	h	h	h	a	h	a	h	h
Block58185	Chr.7	27751284	27817462	h	h	b	a	a	h	h	h	a	b	h	h	h	h	h	h	h	b	h	h	a	b	h	a	h	h	h	h	h	h	h	a	h	a	a	a	h	a	h	h	h	a	h	a	h	h
Block58186	Chr.7	27817484	27827931	h	h	b	a	a	h	h	h	a	h	h	h	h	h	h	h	h	b	a	h	a	h	h	a	h	h	h	h	h	h	h	a	b	a	a	a	h	a	h	h	h	a	h	a	h	h
Block58208	Chr.7	28751240	28759060	h	a	a	h	a	h	a	b	a	b	h	h	h	h	b	b	h	b	a	h	a	b	b	a	b	a	b	b	b	h	h	a	b	h	a	a	b	h	h	h	h	a	h	a	b	b
Block58447	Chr.7	29680986	29686366	b	h	a	h	a	h	a	b	a	b	h	h	h	h	b	b	h	b	a	h	a	b	b	a	b	h	b	h	b	h	h	a	b	h	a	a	b	a	h	h	h	a	h	a	h	b
Block58497	Chr.7	29739794	29752092	h	h	a	h	a	h	a	b	a	b	h	h	h	h	b	b	h	b	a	h	a	b	b	a	b	h	b	h	b	h	h	a	b	h	a	a	b	h	h	h	h	a	h	a	h	b
Block58503	Chr.7	29757740	29770343	h	h	a	h	a	h	a	b	a	b	h	h	h	h	b	b	h	b	a	h	a	b	b	a	b	h	b	h	b	h	h	a	b	h	a	a	b	h	h	h	h	a	h	a	h	b
Block58504	Chr.7	29770359	29779566	h	h	a	h	a	h	a	b	a	b	h	h	h	h	b	b	h	b	a	h	a	b	b	a	b	h	b	h	b	h	h	a	b	h	a	a	b	h	h	h	h	a	h	a	h	b
Block58505	Chr.7	29779774	29789800	h	h	a	h	a	h	a	b	a	b	h	h	h	h	b	b	h	b	a	h	a	b	b	a	b	h	b	h	b	h	h	a	b	h	a	a	b	h	h	h	h	a	h	a	h	b
Block58508	Chr.7	29796861	29802163	h	h	a	h	a	h	a	b	a	b	h	h	h	h	b	b	h	b	a	h	a	b	b	a	b	h	b	h	b	h	h	a	b	h	a	a	b	h	h	h	h	a	h	a	h	b
Block58529	Chr.7	29811633	29816748	h	h	a	h	a	h	a	b	a	b	h	h	h	h	b	b	h	b	a	h	a	b	b	a	b	h	b	h	b	h	h	a	b	h	a	a	b	h	h	h	h	a	h	a	h	b
Block58595	Chr.7	29868668	29874193	h	h	a	h	a	h	a	b	a	b	h	h	h	h	b	b	h	b	a	h	a	b	b	a	b	h	b	h	b	h	h	a	b	h	a	a	b	h	h	h	h	a	h	a	h	b
Block58600	Chr.7	29879278	29885776	h	h	a	h	a	h	a	b	a	b	h	h	h	h	b	b	h	b	a	b	a	b	b	a	b	h	b	b	b	h	h	a	b	h	a	a	b	h	h	h	h	a	h	a	b	b
Block58604	Chr.7	29894842	29900054	h	h	a	h	a	h	a	b	a	b	h	h	h	h	b	b	h	b	a	h	a	b	b	a	b	h	b	b	b	h	h	a	b	h	a	a	b	h	h	h	h	a	h	a	b	b
Block58609	Chr.7	29906714	29912428	h	h	a	h	a	h	a	b	a	b	h	h	h	b	b	b	h	b	a	h	a	b	b	a	b	b	b	h	b	b	h	a	b	h	a	a	b	b	h	h	h	a	b	a	b	b
Block58638	Chr.7	29941492	29995619	h	h	a	h	a	h	a	b	a	b	h	h	h	b	b	b	h	b	a	h	a	b	b	a	b	h	b	h	b	b	h	a	b	b	a	a	b	h	h	h	h	a	b	a	b	b
Block58654	Chr.7	30001735	30007006	h	h	a	h	a	h	a	b	a	b	h	h	h	b	b	b	h	b	a	h	a	b	b	a	b	h	b	h	b	h	h	a	b	b	a	a	b	h	h	h	h	a	h	a	b	b
Block58657	Chr.7	30010942	30019555	h	h	a	h	a	h	a	b	a	b	a	h	h	h	b	b	h	b	a	h	a	b	b	a	b	a	b	h	b	a	h	a	b	h	a	a	b	a	h	a	h	a	h	a	h	b
Block58884	Chr.7	30154588	30219454	h	a	a	h	a	h	a	b	a	b	h	h	h	h	b	b	a	b	a	h	a	b	b	a	b	a	b	a	b	h	h	a	b	h	a	a	b	h	h	h	h	a	h	a	h	b
Block58910	Chr.7	30236790	30243649	h	a	a	a	a	h	a	b	a	b	h	h	h	h	b	b	a	b	a	h	a	b	b	a	b	a	b	a	b	h	h	a	b	h	a	a	b	h	h	h	h	a	h	a	h	b
Block58911	Chr.7	30245241	30252113	h	a	a	a	a	h	a	b	a	b	h	h	h	a	b	b	h	b	a	h	a	b	b	a	b	h	b	h	b	h	h	a	b	h	a	a	b	a	h	h	h	a	h	a	h	b
Block58933	Chr.7	30262197	30270928	h	h	a	h	a	h	a	b	a	b	h	h	h	h	b	b	h	b	a	h	a	b	b	a	b	h	b	a	b	h	h	a	b	h	a	a	b	h	h	h	h	a	h	a	h	b
Block58945	Chr.7	30289083	30299866	h	h	a	h	a	h	a	b	a	b	h	h	h	h	b	b	h	b	a	h	a	b	b	a	b	h	b	h	b	h	h	a	b	h	a	a	b	h	h	h	h	a	h	a	h	b
Block58977	Chr.7	30313826	30326921	h	h	a	h	a	h	a	b	a	b	a	h	h	h	b	b	h	b	a	h	a	b	b	a	b	h	b	h	b	h	a	a	b	h	a	a	b	h	h	h	h	a	h	a	a	b
Block59275	Chr.7	30527122	30533254	h	h	a	h	a	h	a	b	a	b	h	h	h	h	b	b	h	b	a	h	a	b	b	a	b	h	b	h	b	h	a	a	b	h	a	a	b	h	h	h	h	a	h	a	a	b
Block59276	Chr.7	30533291	30539510	h	h	a	h	a	h	a	b	a	b	h	h	h	h	b	b	h	b	a	h	a	b	b	a	b	h	b	h	b	h	h	a	b	h	a	a	b	h	h	h	h	a	h	a	h	b
Block59354	Chr.7	30608335	30616684	h	h	a	h	a	h	a	b	a	b	h	h	h	h	b	b	h	b	a	h	a	b	b	a	b	a	b	h	b	a	h	a	b	h	a	a	b	h	h	h	h	a	h	a	h	b
Block59472	Chr.7	30710832	30716178	h	h	a	h	a	h	a	b	a	b	h	h	h	a	b	b	h	b	a	h	a	b	b	a	b	a	b	h	b	h	h	a	b	h	a	a	b	h	h	h	h	a	h	a	h	b
Block59501	Chr.7	30738773	30745495	h	h	a	h	a	h	a	b	a	b	h	h	h	h	b	b	h	b	a	h	a	b	b	a	b	a	b	h	b	h	h	a	b	h	a	a	b	h	h	h	h	a	h	a	h	b
Block59508	Chr.7	30758419	30769901	h	h	a	h	a	h	a	b	a	b	h	h	h	h	b	b	h	b	a	h	a	b	b	a	b	a	b	h	b	h	h	a	b	h	a	a	b	h	h	h	h	a	a	a	h	b
Block59519	Chr.7	30773200	30778597	h	h	a	h	a	h	a	b	a	b	h	a	h	h	b	b	h	b	a	h	a	b	b	a	b	h	b	h	b	h	h	a	b	h	a	a	b	h	h	h	h	a	h	a	h	b
Block59574	Chr.7	30829547	30847813	h	h	a	h	a	h	a	b	a	b	h	h	h	h	b	b	a	b	a	h	a	b	b	a	b	h	b	h	b	h	a	a	b	h	a	a	b	h	h	a	h	a	h	a	h	b
Block59608	Chr.7	30878070	30883248	a	h	a	h	a	h	a	b	a	b	a	h	h	h	b	b	h	b	a	h	a	b	b	a	b	h	b	h	b	h	h	a	b	h	a	a	b	h	h	h	h	a	a	a	h	b
Block59652	Chr.7	30897263	30903031	h	h	a	h	a	h	a	b	a	b	h	h	h	h	b	b	h	b	a	h	a	b	b	a	b	h	b	h	b	h	h	a	b	h	a	a	b	h	h	a	h	a	a	a	a	b
Block59663	Chr.7	30935922	30952347	h	h	a	h	a	h	a	b	a	b	h	h	h	h	b	b	h	b	a	h	a	b	b	a	b	h	b	h	b	h	h	a	b	h	a	a	b	h	h	a	h	a	a	a	a	b
Block59664	Chr.7	30952355	30962811	h	h	a	h	a	h	a	b	a	b	h	h	h	h	b	b	h	b	a	h	a	b	b	a	b	h	b	h	b	h	h	a	b	h	a	a	b	h	h	h	h	a	h	a	h	b
Block59757	Chr.7	31034153	31040002	h	h	a	h	a	h	a	b	a	b	h	h	h	h	b	b	h	b	a	h	a	b	b	a	b	h	b	h	b	h	h	a	b	h	a	a	b	h	h	h	h	a	h	a	h	b
Block59761	Chr.7	31043777	31051751	h	h	a	h	a	h	a	b	a	b	h	h	h	h	b	b	h	b	a	h	a	b	b	a	b	h	b	h	b	h	h	a	b	h	a	a	b	h	h	h	h	a	h	a	h	b
Block59767	Chr.7	31058522	31094080	h	h	a	h	a	h	a	b	a	b	h	h	h	h	b	b	h	b	a	h	a	b	b	a	b	h	b	h	b	h	h	a	b	h	a	a	b	h	h	h	h	a	h	a	h	b
Block59774	Chr.7	31099602	31104647	h	h	a	h	a	h	a	b	a	b	h	h	h	h	b	b	h	b	a	h	a	b	b	a	b	h	b	h	b	h	h	a	b	h	a	a	b	h	h	h	h	a	h	a	h	b
Block59775	Chr.7	31106900	31124778	h	h	a	h	a	h	a	b	a	b	h	h	h	h	b	b	h	b	a	h	a	b	b	a	b	h	b	h	b	h	h	a	b	h	a	a	b	h	a	h	h	a	h	a	h	b
Block59855	Chr.7	31161930	31167237	b	h	a	a	a	h	a	b	a	b	h	h	h	h	b	b	h	b	a	h	a	b	h	a	b	h	b	a	b	h	h	a	b	h	a	a	b	h	h	h	h	a	h	a	h	b
Block59861	Chr.7	31169108	31273554	b	h	h	h	a	h	a	b	a	b	h	h	h	h	b	b	h	b	a	h	a	b	h	a	b	h	b	a	b	h	h	a	b	a	a	a	b	h	h	h	h	a	h	a	h	b
Block59868	Chr.7	31280621	31288312	b	h	h	h	a	h	h	b	a	b	h	h	h	h	b	b	h	b	a	h	a	b	a	a	b	h	b	h	b	h	h	a	b	a	a	a	b	h	h	h	h	a	h	a	h	b
Block59873	Chr.7	31297442	31302859	b	h	a	h	a	h	h	b	a	b	h	h	h	h	b	b	h	b	a	h	a	b	h	a	b	h	b	a	b	h	h	a	b	a	a	a	b	b	h	a	h	a	h	a	h	b
Block59882	Chr.7	31309682	31318333	b	h	h	h	a	h	h	b	a	b	h	h	h	h	b	b	h	b	a	h	a	b	h	a	b	h	b	h	b	h	h	a	b	a	a	a	b	b	h	h	h	a	h	a	h	b
Block59925	Chr.7	31341687	31347822	b	h	h	h	a	h	h	b	a	b	h	h	h	h	b	b	h	b	a	h	a	b	h	a	b	h	b	h	b	h	h	a	b	h	a	a	b	b	h	h	h	a	h	a	h	b
Block59943	Chr.7	31368205	31401384	b	h	h	h	a	h	h	b	a	b	h	h	h	h	b	b	h	b	a	h	a	b	h	a	b	h	b	h	b	h	h	a	b	a	a	a	b	b	h	h	h	a	h	a	h	b
Block60007	Chr.7	31471089	31478271	b	h	h	h	a	h	h	b	a	b	h	h	h	h	b	b	h	b	a	h	a	b	h	a	b	h	b	h	b	h	h	a	b	h	a	a	b	b	h	h	h	a	h	a	h	b
Block60022	Chr.7	31486314	31492582	b	h	h	h	a	h	h	b	a	b	a	h	h	h	b	b	h	b	a	h	a	b	h	a	b	h	b	a	b	h	h	a	b	h	a	a	b	b	h	h	h	a	h	a	h	b
Block60068	Chr.7	31548280	31555776	b	b	h	h	a	h	h	b	a	b	a	h	h	h	b	b	h	b	a	h	a	b	h	a	b	h	b	a	b	h	h	a	b	h	h	a	b	b	h	h	h	a	h	a	h	b
Block60071	Chr.7	31611742	31622001	b	b	h	h	a	h	h	b	a	b	a	h	h	h	b	b	h	b	a	h	a	b	h	a	b	h	b	a	b	h	h	a	b	h	h	a	b	b	h	h	h	a	h	h	h	b
Block60072	Chr.7	31630460	31663796	b	b	h	h	a	h	h	b	h	b	a	h	a	h	h	b	h	b	a	h	a	h	h	a	b	h	b	a	b	h	h	a	b	h	h	a	b	b	h	h	h	a	h	h	h	b
Block60082	Chr.7	32116371	32142833	h	b	h	h	a	h	h	b	h	b	a	h	a	h	h	b	h	b	a	h	a	h	h	a	b	h	b	a	b	h	h	a	b	h	h	a	h	b	h	h	h	a	h	h	h	b
Block60083	Chr.7	32154184	32164843	h	b	h	h	a	h	h	b	h	b	h	h	a	h	h	b	h	b	a	h	a	h	h	a	b	h	b	a	b	h	h	a	b	h	h	a	h	h	h	h	h	a	h	h	h	b
Block60087	Chr.7	32172106	32189099	h	b	h	h	a	h	h	b	h	b	h	h	a	h	h	b	h	b	a	h	a	h	h	a	b	h	b	a	b	h	h	a	b	h	h	a	h	h	h	h	h	a	h	h	h	b
Block60088	Chr.7	32193281	32207089	h	b	h	h	a	h	h	b	h	b	h	h	a	h	h	b	h	b	a	h	a	h	h	a	b	h	b	a	b	h	h	a	b	h	h	h	h	h	h	h	h	a	h	h	h	b
Block60089	Chr.7	32207504	32243528	h	b	h	h	a	h	h	b	h	b	h	h	a	h	h	b	h	b	a	h	a	h	h	a	b	h	b	a	b	h	h	a	b	h	h	h	h	h	h	h	h	a	h	h	h	b
Block60092	Chr.7	32250780	32256587	h	b	h	h	a	h	h	b	h	b	h	h	a	h	h	b	h	b	a	h	a	h	h	a	b	h	b	a	b	h	h	a	b	h	h	h	h	h	h	h	h	a	h	h	h	b
Block60093	Chr.7	32256593	32296834	h	b	h	h	a	h	h	b	h	b	h	h	a	h	h	b	h	b	a	h	a	h	h	a	b	h	b	a	b	h	h	a	b	h	h	h	h	h	h	h	h	a	h	h	h	b
Block60094	Chr.7	32320872	32341968	h	b	h	h	a	h	h	b	h	b	h	h	a	h	h	b	h	b	a	h	a	h	h	a	b	h	b	a	b	h	h	a	b	h	h	h	h	h	h	h	h	a	h	h	h	b
Block60095	Chr.7	32343939	32357779	h	b	h	h	a	h	h	h	a	b	b	b	h	a	a	a	h	h	a	a	a	h	h	h	b	h	b	h	h	h	h	a	b	a	a	b	h	h	b	h	h	h	h	h	h	b
Block60270	Chr.7	34383968	34389184	h	b	h	b	h	b	h	h	a	b	b	b	h	h	a	a	h	h	a	a	a	h	h	h	b	h	b	h	h	h	h	a	b	a	h	b	h	h	b	h	h	h	h	h	h	b
Block60378	Chr.7	34504731	34543802	h	b	h	b	h	b	h	h	a	b	b	b	h	h	a	a	h	h	a	a	a	h	h	h	b	h	b	h	h	h	h	a	b	a	h	b	h	h	b	h	h	h	h	h	h	b
Block60382	Chr.7	34633332	34699102	h	b	h	b	h	b	h	h	a	b	b	b	h	h	a	a	h	h	a	a	a	h	h	h	b	h	b	h	h	h	b	a	b	a	h	b	h	h	b	h	h	h	h	h	h	b
Block60385	Chr.7	34731305	34822369	h	b	h	b	h	b	h	h	a	b	b	b	h	h	a	a	h	h	a	a	a	h	h	h	b	h	b	h	h	h	b	a	b	a	h	b	h	h	b	h	h	h	a	h	h	b
Block60387	Chr.7	34855602	34867571	h	b	h	b	h	b	h	h	a	b	b	b	h	h	a	a	h	h	a	a	a	h	h	h	b	h	b	h	h	h	b	h	b	a	h	b	a	h	b	h	h	h	a	h	h	b
Block60394	Chr.7	34906972	34956103	h	b	h	b	h	b	h	h	a	b	b	b	h	h	a	a	h	h	a	a	a	h	h	h	b	h	b	h	h	h	b	h	b	a	h	b	a	h	b	h	h	h	a	h	h	b
Block60397	Chr.7	35013223	35018957	h	b	h	h	h	b	h	h	a	h	b	b	h	h	a	a	h	h	a	a	a	h	h	h	b	h	b	h	h	h	b	h	b	a	h	b	a	h	b	h	h	h	a	h	h	b
Block60398	Chr.7	35019372	35025286	h	b	h	h	h	b	h	h	a	h	b	b	h	h	a	a	h	h	a	a	a	h	h	h	b	h	b	h	h	h	b	h	b	a	h	b	a	h	b	h	h	h	a	h	h	b
Block60401	Chr.7	35097127	35107984	a	b	h	h	h	b	h	h	a	h	b	b	h	h	h	a	h	h	a	a	a	h	h	h	b	h	b	h	h	h	b	h	b	a	h	b	a	h	b	h	h	a	a	h	h	b
Block60407	Chr.7	35202592	35418844	a	b	h	h	h	b	h	a	a	h	b	b	h	b	h	a	a	h	a	a	a	h	h	h	b	h	b	h	h	h	h	h	b	a	h	b	a	h	b	h	h	h	a	h	h	b
Block60533	Chr.7	35558398	35608386	a	b	h	h	h	b	h	h	a	h	b	b	h	b	h	a	a	h	a	a	a	h	h	h	b	h	b	h	h	h	h	h	b	a	h	b	a	h	b	h	h	h	a	h	h	b
Block60534	Chr.7	35620843	35696661	a	b	h	h	h	b	h	h	a	h	b	b	h	b	h	a	a	h	a	a	a	h	h	h	b	h	b	h	h	h	h	h	b	a	h	b	a	h	b	h	h	h	a	h	h	b
Block60535	Chr.7	35696826	35952347	a	b	h	h	h	b	h	h	b	a	b	b	h	a	h	a	a	a	b	b	h	h	a	a	h	a	b	b	a	a	h	h	b	a	h	h	b	h	b	a	h	a	h	h	h	b
Block60775	Chr.8	849700	856887	a	h	b	b	a	a	a	h	b	a	b	b	h	a	h	a	a	a	b	b	h	h	a	a	a	a	b	b	a	a	h	h	b	a	h	h	b	h	b	a	h	a	h	h	h	b
Block60780	Chr.8	859121	865934	a	h	b	b	a	a	a	h	b	a	b	b	a	h	h	a	a	a	b	b	h	h	a	a	h	a	b	b	h	a	h	h	b	a	h	h	b	h	b	a	h	a	h	h	h	b
Block60806	Chr.8	890395	994166	h	h	b	b	a	a	a	h	h	a	b	b	h	h	h	a	a	a	b	b	h	h	a	a	h	a	b	h	h	a	h	h	h	a	h	h	b	h	b	a	h	h	h	h	h	h
Block60823	Chr.8	1085044	1160433	h	h	b	b	a	a	h	h	h	h	b	b	h	h	h	a	a	a	b	b	h	h	a	a	h	a	b	h	h	a	h	h	h	a	h	h	b	h	b	a	h	h	h	h	h	h
Block60824	Chr.8	1165202	1190685	h	h	b	b	a	a	h	h	h	h	b	b	h	h	h	a	a	a	b	a	a	h	a	a	h	a	b	h	h	a	h	h	h	a	h	h	b	h	b	a	h	h	h	h	h	h
Block60825	Chr.8	1229339	1240445	h	h	b	b	a	a	h	h	h	h	b	b	h	h	h	a	a	a	b	a	a	h	a	a	h	a	b	h	h	a	h	a	h	a	h	h	b	h	b	a	h	h	h	h	h	h
Block60826	Chr.8	1327249	1342822	h	h	b	b	a	a	h	h	h	h	b	b	h	h	h	a	a	a	b	a	a	h	a	a	h	h	b	h	h	a	h	a	h	a	h	h	b	a	b	a	h	h	h	h	h	h
Block60830	Chr.8	1343905	1395271	h	h	b	b	a	a	h	h	h	h	b	b	h	h	h	a	a	a	b	a	a	h	a	a	h	h	b	h	a	a	h	a	h	a	h	h	b	a	b	a	h	h	h	h	h	h
Block60831	Chr.8	1395351	1490244	h	h	b	b	a	a	h	h	a	h	b	b	h	a	h	a	a	a	b	a	a	b	h	a	h	h	b	b	h	a	h	a	b	h	h	h	h	h	b	h	b	h	h	h	a	h
Block61034	Chr.8	2223458	2256004	h	a	b	b	a	a	b	h	a	h	b	b	h	a	h	a	a	a	b	a	a	b	h	a	h	h	b	b	b	a	h	a	b	h	b	h	b	h	b	h	b	h	h	b	a	h
Block61050	Chr.8	2282839	2301427	h	h	b	b	a	a	b	h	a	h	b	b	h	a	h	a	a	a	b	a	a	b	h	a	h	h	b	b	b	a	h	a	b	h	b	h	b	h	b	h	b	h	h	b	a	h
Block61052	Chr.8	2301839	2313297	h	h	b	b	a	a	b	h	a	h	b	b	h	a	h	a	a	a	b	a	a	b	h	a	h	h	b	b	h	a	h	a	b	h	h	h	h	h	b	h	b	h	h	a	a	h
Block61127	Chr.8	2373822	2388649	h	h	b	b	a	a	b	a	a	h	b	b	h	a	h	a	a	a	b	a	a	b	h	a	h	h	b	b	h	a	h	a	b	h	h	h	a	h	b	h	b	h	h	h	a	h
Block61133	Chr.8	2398667	2404000	h	h	b	b	a	a	b	h	a	h	b	b	h	a	h	a	a	a	b	a	a	b	h	a	h	h	b	b	h	a	h	a	b	h	h	h	a	h	b	h	b	h	h	h	a	h
Block61136	Chr.8	2407963	2439325	h	h	b	b	a	a	b	h	a	h	b	b	h	a	h	a	h	a	b	a	a	b	h	a	h	h	b	b	h	a	h	a	b	h	h	h	h	h	b	h	b	h	h	h	a	h
Block61164	Chr.8	2463956	2497695	h	a	h	b	a	a	b	h	a	h	b	b	h	a	h	a	h	a	b	a	a	b	h	a	h	h	b	b	h	a	h	a	b	h	h	h	h	h	b	h	b	h	h	h	a	h
Block61165	Chr.8	2553301	2883390	h	a	h	b	a	a	b	h	a	h	b	b	h	a	h	a	h	a	b	a	a	b	h	a	h	h	b	b	h	a	h	a	b	h	h	h	h	h	b	h	b	h	h	h	a	h
Block61167	Chr.8	2884200	2893985	h	h	h	b	a	a	b	h	a	h	b	b	h	a	h	a	h	a	b	a	a	b	h	a	h	h	b	b	h	a	h	a	b	h	h	h	h	h	b	h	b	h	h	h	a	h
Block61170	Chr.8	2896405	2902794	h	h	h	b	a	a	b	h	a	h	b	b	h	a	h	a	h	a	b	a	a	b	h	a	h	h	b	b	h	a	h	a	b	h	h	h	h	h	b	h	b	h	h	h	a	h
Block61171	Chr.8	2902822	2913221	h	h	h	b	a	a	b	h	a	h	b	b	h	a	h	a	h	a	b	a	a	b	h	a	h	h	b	b	h	a	h	a	b	h	h	h	h	h	b	h	b	h	h	h	a	h
Block61202	Chr.8	2935368	2940498	h	h	h	b	a	a	b	h	a	h	b	b	h	a	h	a	h	a	b	a	a	b	h	a	h	h	b	b	h	a	h	a	b	h	h	h	h	h	b	h	b	h	h	h	a	h
Block61203	Chr.8	2940971	2947323	h	h	h	b	a	a	b	h	a	h	b	b	h	a	h	a	h	a	b	a	a	b	h	a	h	h	b	b	h	a	h	a	b	h	h	h	h	h	b	h	b	h	h	h	a	h
Block61205	Chr.8	2952075	2971870	h	h	h	b	a	a	b	h	a	h	b	b	h	a	h	a	h	a	b	a	a	b	h	a	h	h	b	b	h	a	h	a	b	h	h	a	h	h	b	h	b	h	h	h	a	h
Block61240	Chr.8	3003806	3018680	a	h	h	b	a	a	b	h	a	h	b	b	h	a	h	a	h	a	b	a	a	b	h	a	h	h	b	b	h	a	h	a	b	h	h	h	h	h	b	h	b	h	h	h	a	h
Block61246	Chr.8	3026579	3072041	h	h	h	b	a	a	b	h	a	h	b	b	h	a	h	a	h	a	b	a	a	b	h	a	h	h	b	b	h	a	h	a	b	h	h	h	h	h	b	h	b	h	h	h	a	h
Block61253	Chr.8	3075065	3083236	h	h	h	b	a	a	b	h	a	h	b	b	h	a	h	a	h	a	b	a	a	b	h	a	h	h	b	b	h	a	h	a	b	h	h	h	h	h	b	h	b	h	h	h	a	h
Block61319	Chr.8	3116605	3156253	h	h	h	b	a	a	b	h	a	h	b	b	h	a	h	a	h	a	b	a	a	b	h	a	h	h	b	b	h	a	h	a	b	h	h	h	h	h	b	h	b	h	h	h	a	h
Block61320	Chr.8	3156273	3250177	h	h	h	b	a	a	b	h	a	h	b	b	h	a	h	a	h	a	b	a	a	b	h	a	h	h	b	b	h	a	h	a	b	h	h	h	h	h	b	h	b	h	h	h	a	h
Block61324	Chr.8	3252088	3289346	h	h	h	b	a	a	b	h	a	h	b	b	h	a	h	a	h	a	b	a	a	b	h	a	h	h	b	b	h	a	h	a	b	h	h	h	h	h	b	h	b	h	h	h	a	h
Block61325	Chr.8	3289361	3310062	h	h	h	b	a	a	b	h	a	h	b	b	h	a	h	a	h	a	b	a	a	b	h	a	h	h	b	b	h	a	h	a	b	h	h	h	h	h	b	h	b	h	h	h	a	h
Block61327	Chr.8	3310336	3320075	h	h	h	b	a	a	b	h	a	h	b	b	h	a	h	a	h	a	b	a	a	b	h	a	h	h	b	b	h	a	h	a	b	h	h	h	h	h	b	h	b	h	h	h	a	h
Block61328	Chr.8	3320185	3326124	h	h	h	b	a	a	b	h	a	h	b	b	h	a	h	a	h	a	b	a	a	b	h	a	h	h	b	b	h	a	h	a	b	h	h	h	h	h	b	h	b	h	h	h	a	h
Block61347	Chr.8	3350877	3357137	h	h	h	b	a	a	b	h	a	h	b	b	h	a	h	a	h	a	b	a	a	b	h	a	h	h	b	b	h	a	h	a	b	h	h	h	a	h	b	h	b	h	h	h	a	h
Block61408	Chr.8	3411776	3416999	h	h	h	b	a	a	b	h	a	h	b	b	h	a	h	a	h	a	b	a	a	b	h	a	h	a	b	b	h	a	h	a	b	h	h	h	a	h	b	h	b	h	h	h	a	h
Block61411	Chr.8	3420183	3442797	h	h	h	b	a	a	b	h	a	h	b	b	a	a	h	a	h	a	b	a	a	b	h	a	h	a	b	b	h	a	h	a	b	h	h	h	h	h	b	h	b	h	h	h	a	h
Block61417	Chr.8	3445469	3452236	h	h	h	b	a	a	b	h	a	a	b	b	a	a	h	a	h	a	b	a	a	b	h	a	h	h	b	b	h	a	h	a	b	h	h	h	h	h	b	h	b	h	h	h	a	h
Block61435	Chr.8	3467647	3485177	h	h	h	b	a	a	b	h	a	h	b	b	a	a	h	a	h	a	b	a	a	b	h	a	h	a	b	b	h	a	h	a	b	a	h	h	a	h	b	h	b	h	h	h	a	h
Block61514	Chr.8	3503616	3511299	h	h	h	b	a	a	b	h	a	h	b	b	h	a	h	a	h	a	b	a	a	b	h	a	h	h	b	b	h	a	h	a	b	h	h	a	h	h	b	h	b	h	a	h	a	h
Block61557	Chr.8	3542080	3547338	h	h	h	b	a	a	b	h	a	h	b	b	h	a	h	a	h	a	b	a	a	b	h	a	h	h	b	b	h	a	h	a	b	h	h	a	h	h	b	h	b	h	h	h	a	h
Block61560	Chr.8	3550426	3564074	h	h	h	b	a	a	b	a	a	h	b	b	h	a	h	a	h	a	b	a	a	b	h	a	h	h	b	b	h	a	h	a	b	a	h	a	a	h	b	h	b	h	h	a	a	h
Block61817	Chr.8	3711813	3727532	h	h	h	b	a	a	b	a	a	h	b	b	h	a	h	a	h	h	b	a	a	b	h	a	h	h	b	b	h	a	h	a	b	a	a	a	h	h	b	h	b	h	h	h	a	h
Block61822	Chr.8	3731552	3749851	h	h	h	b	a	a	b	a	a	h	b	b	h	a	h	a	h	h	b	a	a	b	h	a	h	h	b	b	h	a	h	a	b	a	a	a	h	h	b	h	b	h	h	h	a	h
Block61823	Chr.8	3752594	3764071	h	h	h	b	a	a	b	a	a	h	b	b	h	a	h	a	h	h	b	a	a	b	h	a	h	h	b	b	h	a	h	a	b	h	a	a	h	h	b	h	b	h	h	h	a	h
Block61826	Chr.8	3770277	3782839	h	h	h	b	a	a	b	a	a	h	b	b	h	a	h	a	h	h	b	a	a	b	h	a	h	h	b	b	h	a	h	a	b	h	a	h	h	h	b	a	b	h	h	h	a	h
Block61829	Chr.8	3787402	3792449	h	h	h	b	a	a	b	a	a	h	b	b	h	a	h	a	a	h	b	a	a	b	h	a	h	h	b	b	h	a	h	a	b	h	h	h	a	h	b	a	b	h	h	h	a	a
Block61835	Chr.8	3795404	3808740	h	h	h	b	a	a	b	a	a	h	b	b	h	a	h	a	a	h	b	a	a	b	h	a	h	a	b	b	h	a	h	a	b	h	h	h	a	h	b	a	b	h	h	h	a	a
Block61839	Chr.8	3813715	3822424	h	h	h	b	a	a	b	a	a	h	b	b	h	a	h	a	h	h	b	a	a	b	h	a	h	h	b	b	h	a	h	a	b	h	h	h	a	h	b	h	b	h	h	h	a	h
Block61987	Chr.8	3903895	3908909	h	h	h	b	a	a	b	a	a	h	b	b	h	a	a	a	h	b	b	a	a	b	h	a	h	h	b	b	h	a	h	a	b	a	h	a	h	h	b	h	b	h	h	h	a	h
Block62076	Chr.8	3971124	3987711	h	h	h	b	a	a	b	a	a	h	b	b	h	a	a	a	h	b	b	a	a	b	h	a	a	h	b	b	h	a	h	a	b	a	h	a	h	h	b	h	b	h	h	h	a	h
Block62082	Chr.8	3991458	3997462	h	h	h	b	a	a	b	a	a	h	b	b	h	a	a	a	h	b	b	a	a	b	h	a	a	h	b	b	h	a	h	a	b	h	h	a	h	h	b	h	b	h	h	h	a	h
Block62084	Chr.8	3997906	4003032	h	h	h	b	a	a	b	a	a	h	b	b	h	a	h	a	h	b	b	a	a	b	h	a	h	h	b	b	h	a	a	a	b	a	h	h	h	h	b	h	b	h	h	h	a	h
Block62142	Chr.8	4058841	4109905	a	h	h	b	a	a	b	a	a	h	b	b	h	a	h	a	h	b	b	a	a	b	h	a	h	h	b	b	a	a	h	a	b	h	h	h	h	h	b	h	b	h	h	h	a	h
Block62221	Chr.8	4164945	4180143	h	h	h	b	a	a	b	a	a	h	b	b	h	a	h	a	h	b	b	a	a	b	h	a	h	h	b	b	h	a	h	a	b	h	h	h	h	h	b	h	b	h	h	h	a	h
Block62230	Chr.8	4191071	4198601	h	h	h	b	a	a	b	a	a	h	b	b	h	a	h	a	h	b	b	a	a	b	h	a	h	h	b	b	h	a	h	a	b	h	h	h	h	h	b	h	b	a	h	h	a	h
Block62245	Chr.8	4209432	4215668	h	h	h	b	a	a	b	a	a	h	b	b	h	a	h	a	h	b	b	a	a	b	h	a	h	h	b	b	h	a	h	a	b	h	h	h	h	h	b	h	b	h	h	h	a	h
Block62253	Chr.8	4224667	4241022	h	h	h	b	a	a	b	a	a	h	b	b	h	a	h	a	h	b	b	a	a	b	h	a	h	h	b	b	h	a	h	a	b	h	h	h	h	h	b	h	b	h	h	h	a	h
Block62255	Chr.8	4241341	4247201	h	h	h	b	a	a	b	a	a	h	b	b	h	a	h	a	h	b	b	a	a	b	h	a	h	h	b	b	h	a	h	a	b	h	h	h	h	h	b	h	b	h	h	h	a	h
Block62262	Chr.8	4250960	4259459	h	h	h	b	a	a	b	a	a	h	b	b	h	a	h	a	h	b	b	a	a	b	a	a	h	h	b	b	a	a	h	a	b	a	h	h	h	a	b	a	b	h	h	h	a	h
Block62302	Chr.8	4283602	4300000	h	a	h	b	a	a	b	a	a	h	b	b	h	a	h	a	h	b	b	a	a	b	h	a	h	h	b	b	h	a	h	a	b	h	h	h	h	h	b	h	b	h	a	h	a	h
Block62372	Chr.8	4359899	4380158	h	h	h	b	a	a	b	a	a	h	b	b	h	a	h	a	h	b	b	a	a	b	h	a	h	h	b	b	h	a	h	a	b	h	h	h	h	a	b	h	b	h	a	h	a	h
Block62373	Chr.8	4380479	4396747	h	h	h	b	a	a	b	a	a	h	b	b	h	a	h	a	h	b	b	a	a	b	h	a	a	h	b	b	h	a	h	a	b	a	h	h	h	a	b	a	b	h	h	h	a	h
Block62425	Chr.8	4425656	4436517	h	h	h	b	a	a	b	a	a	h	b	b	h	a	h	a	h	b	b	a	a	b	h	a	a	h	b	b	h	a	h	a	b	h	h	h	h	a	b	h	b	h	h	h	a	h
Block62464	Chr.8	4463743	4477739	h	h	h	b	h	a	b	a	a	h	b	b	h	a	h	a	a	b	b	a	a	b	h	a	h	h	b	b	h	a	h	a	b	h	h	h	h	h	b	h	b	h	h	h	a	h
Block62477	Chr.8	4484403	4499881	h	h	h	b	h	a	b	a	a	h	b	b	h	a	h	a	h	b	b	a	a	b	h	a	h	h	b	b	h	a	h	a	b	h	h	a	h	h	b	h	b	h	h	h	a	h
Block62566	Chr.8	4549231	4556254	h	h	h	b	h	a	b	a	a	h	b	b	h	a	h	a	h	b	b	a	a	b	h	a	h	h	b	b	h	a	h	a	b	h	h	h	h	h	b	h	b	h	h	h	a	h
Block62572	Chr.8	4560084	4568223	h	h	h	b	h	a	b	a	a	h	b	b	h	a	h	a	h	b	b	a	a	b	h	a	h	h	b	b	h	a	h	a	b	h	a	h	a	a	b	h	b	h	h	h	a	h
Block62641	Chr.8	4635919	4647887	a	h	h	b	h	a	b	a	a	h	b	b	h	a	a	a	h	b	b	a	a	b	h	a	a	h	b	b	h	a	h	a	b	h	a	h	h	h	b	h	b	h	h	h	a	a
Block62802	Chr.8	4768444	4776400	h	h	h	b	h	a	b	a	a	h	b	b	h	a	a	a	h	b	b	a	a	b	h	a	h	a	b	b	h	a	h	a	b	a	a	h	h	h	b	h	b	h	h	h	a	h
Block63075	Chr.8	4906710	4915828	h	h	h	b	h	a	b	a	a	h	b	b	h	a	h	a	h	b	b	a	a	b	h	a	h	h	b	b	h	a	h	a	b	a	a	h	h	h	b	h	b	h	h	h	a	h
Block63081	Chr.8	4921540	4928379	h	h	h	b	h	a	b	a	a	h	b	b	h	a	h	a	h	b	b	a	a	b	h	a	h	h	b	b	h	a	h	a	b	a	h	h	h	h	b	h	b	h	h	h	a	h
Block63084	Chr.8	4928993	4935302	h	h	h	b	h	a	b	a	a	h	b	b	h	a	h	a	h	b	b	a	a	b	a	a	h	h	b	b	h	a	h	a	b	h	h	h	a	h	b	h	b	h	a	h	a	h
Block63145	Chr.8	4972873	4988517	h	h	h	b	h	a	b	a	a	h	b	b	h	a	h	a	h	b	b	a	a	b	h	a	h	h	b	b	h	a	h	a	b	h	h	h	a	h	b	h	b	h	h	h	a	h
Block63371	Chr.8	5073214	5083072	h	h	h	b	h	a	b	a	a	h	b	b	h	a	h	a	h	b	b	a	a	b	h	a	h	h	b	b	h	a	h	a	b	h	h	h	a	h	b	h	b	h	h	h	a	h
Block63372	Chr.8	5083079	5112038	h	h	h	b	h	a	b	a	a	h	b	b	h	a	h	a	h	b	b	a	a	b	h	a	h	h	b	b	h	a	h	a	b	h	h	h	h	h	b	h	b	h	h	h	a	h
Block63374	Chr.8	5112089	5117181	h	h	h	b	h	a	b	a	a	h	b	b	h	a	h	a	h	b	b	a	a	b	h	a	h	h	b	b	h	a	h	a	b	h	h	h	h	h	b	h	b	h	h	h	a	h
Block63375	Chr.8	5118751	5159939	h	h	h	b	h	a	b	a	a	h	b	b	h	a	h	a	h	b	b	a	a	b	h	a	h	h	b	b	h	a	h	a	b	h	h	h	h	h	b	a	b	h	h	h	a	h
Block63378	Chr.8	5161933	5207770	h	h	h	b	h	a	b	a	a	h	b	b	a	a	a	a	h	b	b	a	a	b	h	a	h	h	b	b	a	a	a	a	b	a	h	h	h	a	b	a	b	h	h	a	a	h
Block63577	Chr.8	5400114	5437452	a	h	h	b	a	a	b	a	a	h	b	b	a	a	h	a	h	b	b	a	a	b	h	a	h	h	b	b	a	a	h	a	b	a	h	h	h	a	b	a	b	h	h	a	a	h
Block63582	Chr.8	5442943	5452420	h	h	h	b	a	a	b	a	a	h	b	b	h	a	h	a	h	b	b	a	a	b	h	a	h	h	b	b	h	a	h	a	b	h	h	h	h	a	b	h	b	h	h	h	a	h
Block63645	Chr.8	5498437	5505042	h	h	h	b	h	a	b	a	a	h	b	b	h	a	a	a	h	b	b	a	a	b	h	a	a	h	b	b	h	a	a	a	b	h	h	a	h	h	b	h	b	h	h	h	a	h
Block63675	Chr.8	5528636	5534542	h	h	h	b	h	a	b	a	a	h	b	b	a	a	h	a	h	b	b	a	a	b	h	a	a	h	b	b	h	a	a	a	b	h	h	h	h	h	b	h	b	h	h	a	a	h
Block63692	Chr.8	5540699	5548985	h	h	h	b	h	a	b	a	a	h	b	b	h	a	h	a	h	b	b	a	a	b	h	a	h	h	b	b	h	a	h	a	b	h	h	a	h	h	b	h	b	h	h	h	a	h
Block63707	Chr.8	5585812	5603304	h	h	h	b	h	a	b	a	a	h	b	b	h	a	h	a	h	b	b	a	a	b	h	a	h	h	b	b	h	a	h	a	b	h	h	a	h	h	b	h	b	h	h	h	a	h
Block63709	Chr.8	5608419	5616364	h	h	h	b	h	a	b	a	a	h	b	b	h	a	h	a	h	b	b	a	a	b	h	a	h	h	b	b	h	a	h	a	b	h	h	h	h	h	b	h	b	h	h	h	a	h
Block63711	Chr.8	5618149	5626569	h	h	h	b	h	a	b	a	a	h	b	b	h	a	h	a	h	b	b	a	h	b	h	a	h	h	b	b	h	a	h	a	b	h	h	h	h	h	b	h	b	h	h	h	a	h
Block63921	Chr.8	5743103	5820581	h	h	h	b	h	a	b	a	a	h	b	b	h	a	h	a	h	b	b	a	h	b	h	a	h	h	b	b	h	a	h	a	b	h	h	h	h	h	b	h	b	h	h	h	a	h
Block63922	Chr.8	5820684	5844057	h	h	h	b	h	a	b	a	a	h	b	b	h	a	h	a	h	b	b	a	h	b	h	a	h	h	b	b	h	a	h	a	b	h	h	h	h	h	b	h	b	h	h	h	a	h
Block63923	Chr.8	5844090	5849842	h	h	h	b	h	a	b	a	a	h	b	b	h	a	h	a	h	b	b	a	h	b	h	a	h	h	b	b	h	a	h	a	b	h	h	h	h	h	b	h	b	h	h	h	a	h
Block63925	Chr.8	5851518	5860922	h	h	h	b	h	a	b	a	a	h	b	b	h	a	h	a	h	b	b	a	h	b	h	a	h	h	b	b	a	a	h	a	b	h	a	h	h	a	b	h	b	h	h	h	a	h
Block63943	Chr.8	5879946	5886815	h	h	h	b	h	a	b	a	a	h	b	b	h	a	h	a	h	b	b	a	h	b	h	a	h	h	b	b	a	a	h	a	b	h	a	h	h	h	b	h	b	h	h	h	a	h
Block63946	Chr.8	5887931	5893452	h	h	h	b	h	a	b	a	a	h	b	b	h	a	h	a	h	b	b	a	h	b	h	a	h	h	b	b	h	a	h	a	b	h	h	h	h	h	b	h	b	h	h	h	a	h
Block64155	Chr.8	5979701	5987637	h	h	h	b	h	a	b	a	a	h	b	b	h	a	a	a	h	b	b	a	h	b	h	a	h	h	b	b	h	a	h	a	b	h	h	h	h	h	b	h	b	h	h	h	a	h
Block64162	Chr.8	5996640	6005236	h	h	h	b	h	a	b	a	a	a	b	b	h	a	h	a	h	b	b	a	h	b	h	a	h	h	b	b	h	a	h	a	b	h	h	h	h	h	b	h	b	h	h	h	a	h
Block64169	Chr.8	6015675	6022956	h	h	h	b	h	a	b	a	a	a	b	b	h	a	h	a	a	b	b	a	h	b	h	a	h	h	b	b	h	a	h	a	b	a	h	h	h	h	b	h	b	h	a	h	a	h
Block64207	Chr.8	6047368	6056596	h	h	h	b	h	a	b	a	a	h	b	b	h	a	h	a	a	b	b	a	h	b	h	a	h	a	b	b	h	a	h	a	b	h	h	h	h	h	b	h	b	h	h	h	a	h
Block64228	Chr.8	6068032	6076029	h	h	h	b	h	a	b	a	a	h	b	b	h	a	h	a	h	b	b	a	h	b	h	a	a	h	b	b	a	a	a	a	b	h	h	a	h	h	b	h	b	h	h	a	a	h
Block64289	Chr.8	6104883	6109968	h	h	h	b	a	a	b	a	a	a	b	b	a	a	h	a	h	b	b	a	h	b	h	a	h	h	b	b	h	a	h	a	b	a	a	h	h	h	b	h	b	h	a	h	a	h
Block64514	Chr.8	6254459	6269335	h	h	a	b	h	a	b	a	a	h	b	b	a	a	h	a	h	b	b	a	h	b	h	a	h	h	b	b	h	a	h	a	b	a	h	h	a	h	b	h	b	h	a	h	a	h
Block64517	Chr.8	6285574	6292170	h	h	a	b	h	a	b	a	a	h	b	b	h	a	h	a	h	b	b	a	h	b	h	a	h	h	b	b	a	a	h	a	b	h	h	h	a	h	b	h	b	a	h	h	a	h
Block64532	Chr.8	6298621	6304023	h	h	h	b	h	a	b	a	a	h	b	b	h	a	h	a	h	b	b	a	a	b	a	a	h	h	b	b	h	a	h	a	b	a	h	h	h	h	b	h	b	h	h	h	a	h
Block64558	Chr.8	6317939	6323212	h	a	h	b	h	a	b	a	a	h	b	b	h	a	h	a	h	b	b	a	h	b	h	a	h	h	b	b	h	a	h	a	b	a	h	h	h	h	b	h	b	h	h	h	a	h
Block64593	Chr.8	6334400	6346750	h	h	h	b	h	a	b	a	a	h	b	b	h	a	h	a	h	b	b	a	h	b	h	a	h	h	b	b	h	a	h	a	b	h	h	a	h	h	b	h	b	h	h	h	a	h
Block64595	Chr.8	6348843	6356249	h	h	h	b	h	a	b	a	a	h	b	b	h	a	h	a	h	b	b	a	h	b	h	a	h	h	b	b	h	a	h	a	b	h	h	a	h	h	b	h	b	h	h	h	a	h
Block64596	Chr.8	6356336	6363824	h	h	h	b	h	a	b	a	a	h	b	b	h	a	h	a	h	b	b	a	h	b	h	a	h	h	b	b	h	a	h	a	b	h	h	h	h	h	b	h	b	h	h	h	a	h
Block64600	Chr.8	6365677	6380258	h	h	h	b	h	a	b	a	a	h	b	b	h	a	h	a	a	b	b	a	h	b	h	a	a	h	b	b	h	a	a	a	b	h	h	a	h	h	b	h	b	h	h	h	a	h
Block64622	Chr.8	6399311	6404992	h	h	h	b	h	a	b	a	a	h	b	b	h	a	h	a	h	b	b	a	h	b	a	a	a	h	b	b	h	a	a	a	b	h	h	h	h	h	b	h	b	h	a	h	a	h
Block64639	Chr.8	6435370	6466851	h	h	h	b	a	a	b	a	a	h	b	b	h	a	h	a	h	b	b	a	h	b	h	a	h	h	b	b	h	a	h	a	b	h	h	h	h	h	b	h	b	h	h	a	a	h
Block64759	Chr.8	6520164	6539304	h	h	h	b	h	a	b	a	a	h	b	b	h	a	h	a	h	b	b	a	h	b	h	b	h	a	b	b	h	a	a	a	b	h	h	h	h	h	b	h	b	h	h	h	a	h
Block64830	Chr.8	6676552	6692485	h	h	h	b	h	a	b	a	a	h	b	b	h	a	h	a	h	b	b	a	h	b	h	b	h	h	b	b	h	a	a	a	b	h	h	h	h	h	b	h	b	h	h	h	a	h
Block64832	Chr.8	6718888	6759250	h	h	h	b	h	a	b	a	a	h	b	b	h	a	h	a	h	b	b	a	h	b	h	b	h	h	b	b	h	a	a	a	b	h	h	h	h	h	b	h	b	h	h	h	a	h
Block64834	Chr.8	6910138	6927283	h	h	h	b	h	a	b	a	a	h	b	b	h	a	h	a	h	b	b	a	h	b	h	b	h	h	b	b	h	a	a	a	b	h	h	h	h	h	b	h	b	h	h	h	a	h
Block64835	Chr.8	6986993	7071241	h	h	h	b	h	a	b	a	a	h	b	b	h	a	h	a	h	b	b	a	h	b	h	b	h	h	b	b	h	a	a	a	b	h	h	h	h	h	b	h	b	h	h	h	a	h
Block64836	Chr.8	7146721	7214029	h	h	h	b	h	a	b	a	a	h	b	b	h	a	h	a	h	b	b	a	h	b	h	b	h	h	b	b	h	a	a	a	b	h	h	h	h	h	b	h	b	h	h	h	a	h
Block64837	Chr.8	7216570	7296892	h	h	h	b	h	a	b	a	a	h	b	b	h	a	h	a	h	b	b	a	h	b	h	b	h	h	b	b	h	a	a	a	b	h	h	h	h	h	b	h	b	h	h	h	a	h
Block64838	Chr.8	7328553	7370044	h	h	h	b	h	a	b	a	a	h	b	b	h	a	h	a	h	b	b	a	h	b	h	b	h	h	b	b	h	a	a	a	b	h	h	h	h	h	b	h	b	h	h	h	a	h
Block64839	Chr.8	7426068	7671860	h	h	h	b	h	a	b	a	a	h	b	b	h	a	h	a	h	b	b	a	h	b	h	b	h	h	b	b	h	a	a	a	b	h	h	h	h	h	b	h	b	h	h	h	a	h
Block64840	Chr.8	7706717	7813979	h	h	h	b	h	a	b	a	a	h	b	b	h	a	h	a	h	b	b	a	h	b	h	b	h	h	b	b	h	a	a	a	h	b	h	h	h	h	b	h	b	h	h	h	a	h
Block64842	Chr.8	7999201	8040344	h	h	h	b	h	a	b	a	a	h	b	b	h	a	h	a	h	b	b	a	h	b	h	b	h	h	b	b	h	a	a	a	h	b	h	h	h	h	b	h	b	h	h	h	a	h
Block64843	Chr.8	8069602	8118292	h	h	h	h	h	a	b	a	a	h	b	b	h	a	h	a	h	b	b	a	h	b	h	b	h	h	b	b	h	a	a	a	h	b	h	h	h	h	b	h	b	h	h	h	a	h
Block64844	Chr.8	8129385	8225445	h	h	h	h	h	a	b	a	a	h	b	b	h	a	h	a	h	b	b	a	h	b	h	b	h	h	b	b	h	a	a	a	h	b	h	h	h	h	b	h	b	h	h	h	a	h
Block64845	Chr.8	8237605	8310412	h	h	h	h	h	a	b	a	a	h	b	b	h	a	h	a	h	b	b	a	h	b	h	b	h	h	b	b	h	a	h	a	h	b	h	h	h	h	b	h	b	h	h	h	h	h
Block64856	Chr.8	8329379	8339168	b	h	h	h	h	a	b	a	a	h	b	b	a	a	h	a	h	b	b	a	h	b	a	b	h	a	b	b	h	a	h	a	h	b	h	h	a	a	b	h	b	h	h	h	h	h
Block65114	Chr.8	8417975	8423205	b	h	h	h	h	a	b	a	a	h	b	b	h	a	h	a	h	b	b	a	h	b	h	b	h	h	b	b	h	a	h	a	h	b	h	h	h	a	b	a	b	h	h	a	h	h
Block65427	Chr.8	8516459	8572285	b	h	h	h	h	a	b	a	a	h	b	b	h	a	a	a	h	b	b	a	h	b	h	b	h	h	b	b	h	a	h	a	h	b	h	h	h	h	b	a	b	h	h	a	h	h
Block65428	Chr.8	8577456	8592947	b	h	h	h	h	a	b	a	a	h	b	b	h	a	a	a	h	b	b	a	h	b	h	b	h	h	b	b	h	a	h	a	h	b	h	h	h	h	b	a	b	h	h	a	h	h
Block65431	Chr.8	8594594	8602817	b	h	h	h	h	a	b	a	a	h	b	b	a	a	a	a	h	b	b	a	h	b	a	b	h	h	b	b	h	a	h	a	h	b	h	a	h	h	b	h	b	a	h	h	a	a
Block65452	Chr.8	8619116	8625094	b	a	h	a	h	a	b	a	a	a	b	b	a	a	a	a	h	b	b	a	h	b	a	b	h	h	b	b	a	a	h	a	h	b	h	a	h	h	b	h	b	h	h	h	a	h
Block65472	Chr.8	8631186	8639889	b	a	h	h	h	a	b	a	a	a	b	b	h	a	a	a	h	b	b	a	h	b	a	b	h	h	b	b	a	a	h	a	h	b	h	a	h	h	b	h	b	h	h	h	a	h
Block65475	Chr.8	8642612	8655954	b	a	h	h	h	a	b	a	a	h	b	b	h	a	a	a	h	b	b	a	a	b	h	b	a	a	b	b	a	a	a	a	a	b	h	a	h	a	b	h	b	h	h	a	a	a
Block65583	Chr.8	8701683	8709167	b	a	a	a	a	a	b	a	a	h	b	b	h	a	a	a	h	b	b	a	h	b	h	b	a	a	b	b	a	a	a	a	a	b	a	a	h	a	b	h	b	h	h	h	h	h
Block65595	Chr.8	8723578	8736488	b	a	a	a	h	a	b	a	a	h	b	b	h	a	a	a	a	b	b	a	h	b	h	b	a	h	b	b	h	a	h	a	h	b	h	h	h	a	b	h	b	h	h	h	h	h
Block65648	Chr.8	8764594	8770494	b	a	h	h	h	a	b	a	a	h	b	b	h	a	a	a	h	b	b	a	h	b	h	b	h	h	b	b	h	a	h	a	h	b	h	h	h	h	b	h	b	h	h	h	h	h
Block65663	Chr.8	8784269	8792444	b	h	h	h	a	a	b	a	a	h	b	b	h	a	a	a	h	b	b	a	h	b	h	b	h	a	b	b	h	a	a	a	h	b	h	h	h	h	b	h	b	h	a	a	h	h
Block65741	Chr.8	8844543	8850857	b	a	h	h	h	a	b	a	a	h	b	b	h	a	a	a	h	b	b	a	h	b	h	b	h	a	b	b	h	a	a	a	h	b	h	a	a	h	b	h	b	h	a	a	a	h
Block65747	Chr.8	8854759	8861630	b	a	h	h	h	a	b	a	a	h	b	b	a	a	a	a	h	b	b	a	h	b	h	b	a	h	b	b	h	a	h	a	h	b	h	h	h	h	b	h	b	h	h	h	h	h
Block65788	Chr.8	8892906	8897971	b	a	h	h	h	a	b	a	a	h	b	b	h	a	a	a	h	b	b	a	h	b	h	b	h	h	b	b	h	a	h	a	h	b	h	h	h	h	b	h	b	a	a	h	h	h
Block65860	Chr.8	8955283	8960338	b	h	h	h	h	a	b	a	a	a	b	b	a	a	a	a	a	b	b	a	h	b	h	b	h	h	b	b	h	a	h	a	h	b	h	h	h	h	b	h	b	h	a	a	h	h
Block66053	Chr.8	9070141	9080120	b	h	h	h	h	a	b	a	a	h	b	b	h	a	a	a	h	b	b	a	h	b	h	b	h	h	b	b	h	a	h	a	a	b	h	h	h	h	b	h	b	h	h	h	a	h
Block66082	Chr.8	9094271	9116844	b	h	h	h	h	a	b	a	a	h	b	b	h	a	a	a	a	b	b	a	h	b	h	b	h	h	b	b	h	a	h	a	h	b	h	h	h	h	b	h	b	h	h	a	h	h
Block66185	Chr.8	9165386	9172616	b	h	h	h	h	a	b	a	a	h	b	b	h	a	a	a	h	b	b	a	h	b	h	b	h	h	b	b	h	a	h	a	h	b	h	h	h	h	b	h	b	a	h	h	h	h
Block66356	Chr.8	9263594	9268887	b	a	h	h	h	a	b	a	a	h	b	b	h	a	a	a	h	b	b	a	h	b	h	b	h	h	b	b	h	a	h	a	h	b	h	h	h	h	b	h	b	h	h	h	h	h
Block66380	Chr.8	9287885	9298628	b	h	h	h	h	a	b	a	a	a	b	b	h	a	a	a	h	b	b	a	h	b	h	b	h	h	b	b	h	a	h	a	h	b	h	a	h	h	b	h	b	h	h	h	h	h
Block66595	Chr.8	9382067	9402206	b	h	h	h	h	a	b	a	a	a	b	b	h	a	a	a	h	b	b	a	h	b	h	b	h	h	b	b	h	a	h	a	h	b	h	a	h	h	b	h	b	h	h	h	h	h
Block66598	Chr.8	9406346	9417671	b	h	h	h	h	a	b	a	a	h	b	b	h	a	a	a	h	b	b	a	h	b	h	b	h	h	b	b	h	a	h	a	h	b	h	a	h	h	b	h	b	h	h	a	a	a
Block66731	Chr.8	9461265	9469402	b	h	h	h	h	a	b	a	a	h	b	b	h	a	a	a	h	b	b	a	h	b	a	b	h	a	b	b	h	a	a	a	h	b	h	a	a	h	b	h	b	h	h	a	h	h
Block66843	Chr.8	9509320	9530377	b	h	h	h	h	a	b	a	a	h	b	b	h	a	a	a	h	b	b	a	h	b	a	b	h	a	b	b	h	a	a	a	h	b	h	a	a	h	b	h	b	h	h	a	a	h
Block66847	Chr.8	9534628	9559107	b	h	h	h	h	a	b	a	a	a	b	b	h	a	a	a	h	b	b	a	h	b	h	b	h	h	b	b	h	a	h	a	h	b	h	h	h	a	b	a	b	h	h	h	a	h
Block67014	Chr.8	9605524	9630303	b	h	h	h	h	a	b	a	a	h	b	b	h	a	a	a	h	b	b	a	h	b	h	b	h	h	b	b	h	a	h	a	h	b	h	a	h	h	b	h	b	h	a	h	h	h
Block67032	Chr.8	9636619	9714140	b	h	h	h	h	a	b	a	a	h	b	b	h	a	a	a	h	b	b	a	h	b	h	b	h	h	b	b	h	a	h	a	h	b	h	h	h	h	b	h	b	h	h	h	h	h
Block67345	Chr.8	9803265	9826844	b	h	h	h	h	a	b	a	a	a	b	b	h	a	a	a	h	b	b	a	h	b	h	b	h	h	b	b	h	a	h	a	h	b	h	h	h	h	b	h	b	h	h	h	h	h
Block67348	Chr.8	9828177	9835117	b	h	h	h	h	a	b	a	a	a	b	b	h	a	a	a	h	b	b	a	h	b	h	b	h	h	b	b	h	a	h	a	h	b	h	a	h	h	b	a	b	h	h	h	h	a
Block67354	Chr.8	9838040	9846375	b	h	h	h	h	a	b	a	a	h	b	b	h	a	a	a	h	b	b	a	h	b	h	b	h	h	b	b	h	a	h	a	h	b	h	h	h	h	b	h	b	h	h	h	h	h
Block67503	Chr.8	9910651	9916431	b	h	h	h	h	a	b	a	a	h	b	b	h	a	a	a	h	b	b	a	h	b	h	b	h	h	b	b	h	a	h	a	h	b	h	h	h	h	b	h	b	h	h	h	h	h
Block67505	Chr.8	9920095	9926046	b	h	h	h	h	a	b	a	a	h	b	b	h	a	a	a	h	b	b	a	h	b	h	b	h	h	b	b	h	a	h	a	h	b	h	h	h	h	b	h	b	h	h	h	h	h
Block67508	Chr.8	9927306	9937457	b	h	h	h	h	a	b	a	a	h	b	b	h	a	a	a	h	b	b	a	h	b	h	b	h	h	b	b	h	a	h	a	h	b	h	h	h	h	b	h	b	h	h	h	h	h
Block67510	Chr.8	9942462	9967236	b	h	h	h	h	a	b	a	a	h	b	b	h	a	a	a	h	b	b	a	h	b	h	b	h	h	b	b	h	a	h	a	h	b	h	h	h	h	b	h	b	h	h	a	h	h
Block67511	Chr.8	9967279	9983732	b	h	h	h	h	a	b	a	a	h	b	b	h	a	a	a	h	b	b	a	h	b	h	b	h	h	b	b	h	a	h	a	h	b	h	h	h	h	b	h	b	h	h	h	h	h
Block67515	Chr.8	9991912	9997048	b	h	h	h	h	a	b	a	a	h	b	b	h	a	a	a	h	b	b	a	h	b	h	b	h	h	b	b	h	a	a	a	h	b	h	h	h	h	b	h	b	h	h	h	h	h
Block67516	Chr.8	9997183	10002659	b	h	h	h	h	a	b	a	a	h	b	b	h	a	a	a	h	b	b	a	h	b	h	b	h	h	b	b	h	a	a	a	h	b	h	h	h	h	b	h	b	h	h	h	h	h
Block67520	Chr.8	10007306	10012344	b	h	h	h	h	a	b	a	a	h	b	b	h	a	a	a	h	b	b	a	h	b	h	b	h	h	b	b	h	a	h	a	h	b	h	h	a	h	b	h	b	h	a	h	h	h
Block67529	Chr.8	10026411	10038581	b	h	h	h	h	a	b	a	a	h	b	b	h	a	a	a	h	b	b	a	h	b	h	b	h	h	b	b	h	a	h	a	h	b	h	a	h	h	b	h	b	h	h	h	h	h
Block67566	Chr.8	10092497	10097525	b	h	h	h	h	a	b	a	a	h	b	b	h	a	a	a	h	b	b	a	h	b	h	b	h	h	b	b	h	a	h	a	h	b	h	a	h	h	b	h	b	h	h	a	h	h
Block67569	Chr.8	10102514	10110078	b	h	h	h	h	a	b	a	a	h	b	b	h	a	a	a	h	b	b	a	h	b	h	b	h	h	b	b	h	a	h	a	h	b	h	h	h	h	b	h	b	h	h	a	h	h
Block67573	Chr.8	10112252	10121908	b	h	h	h	h	a	b	a	a	h	b	b	h	a	a	a	h	b	b	a	h	b	h	b	h	h	b	b	h	a	h	a	h	b	h	h	h	h	b	h	b	h	h	h	h	h
Block67574	Chr.8	10122066	10128668	b	h	h	h	h	a	b	a	a	h	b	b	h	a	a	a	h	b	b	a	h	b	h	b	h	h	b	b	h	a	h	a	h	b	h	h	a	h	b	h	b	h	h	h	h	h
Block67576	Chr.8	10134308	10140459	b	h	h	h	h	a	b	a	a	h	b	b	h	a	a	a	h	b	b	a	h	b	h	b	h	h	b	b	h	a	h	a	h	b	h	h	h	h	b	h	b	h	h	h	h	h
Block67578	Chr.8	10142956	10149096	b	h	h	h	h	a	b	a	a	h	b	b	h	a	a	a	h	b	b	a	h	b	h	b	a	h	b	b	h	a	h	a	h	b	h	h	h	h	b	h	b	h	h	h	h	h
Block67581	Chr.8	10156086	10162385	b	h	h	h	h	a	b	a	a	h	b	b	h	a	a	a	h	b	b	a	h	b	h	b	h	h	b	b	h	a	h	a	h	b	h	h	h	h	b	h	b	h	h	h	h	h
Block67582	Chr.8	10162451	10171746	b	h	h	h	h	a	b	a	a	h	b	b	h	a	a	a	h	b	b	a	h	b	h	b	h	h	b	b	h	a	h	a	h	b	h	h	h	h	b	h	b	h	h	h	h	h
Block67583	Chr.8	10171892	10181204	b	h	h	h	h	a	b	a	a	h	b	b	h	a	a	a	h	b	b	a	h	b	h	b	h	h	b	b	a	a	h	a	a	b	h	h	h	h	b	a	b	h	h	h	h	h
Block67588	Chr.8	10189449	10198248	b	h	h	h	h	a	b	a	a	a	b	b	h	a	a	a	h	b	b	a	h	b	h	b	h	h	b	b	h	a	h	a	h	b	h	h	h	h	b	h	b	h	h	h	h	h
Block67687	Chr.8	10267363	10274673	b	h	h	h	h	a	b	a	a	h	b	b	h	a	a	a	h	b	b	a	h	b	h	b	h	h	b	b	h	a	h	a	h	b	h	h	h	h	b	h	b	h	h	h	h	h
Block67691	Chr.8	10280697	10286670	b	h	h	h	h	a	b	a	a	h	b	b	h	a	a	a	h	b	b	a	h	b	h	b	h	h	b	b	h	a	h	a	h	b	h	h	h	h	b	h	b	h	h	h	h	h
Block67695	Chr.8	10295234	10301633	b	h	h	h	h	a	b	a	a	a	b	b	h	a	a	a	h	b	b	a	h	b	h	b	h	h	b	b	h	a	h	a	a	b	a	a	a	a	b	h	b	h	a	h	a	h
Block67771	Chr.8	10359028	10418817	b	a	a	h	h	a	b	a	a	a	b	b	h	a	a	a	h	b	b	a	h	b	h	b	h	h	b	b	h	a	h	a	a	b	a	a	a	h	b	h	b	h	a	h	h	h
Block67785	Chr.8	10431638	10458169	b	h	a	h	h	a	b	a	a	a	b	b	h	a	a	a	h	b	b	a	h	b	h	b	h	h	b	b	h	a	h	a	h	b	a	a	h	h	b	h	b	h	h	h	a	h
Block67808	Chr.8	10482747	10491322	b	h	h	h	a	a	b	a	a	a	b	b	h	a	a	a	h	b	b	a	h	b	a	b	h	a	b	b	h	a	h	a	h	b	h	h	h	a	b	h	b	h	a	h	h	a
Block67825	Chr.8	10507516	10512971	b	h	h	h	h	a	b	a	a	a	b	b	h	a	a	a	h	b	b	a	h	b	a	b	h	h	b	b	h	a	h	a	h	b	h	h	h	h	b	a	b	h	h	h	h	a
Block67834	Chr.8	10515038	10520174	b	h	h	h	h	a	b	a	a	a	b	b	h	a	a	a	h	b	b	a	h	b	h	b	h	h	b	b	a	a	h	a	h	b	h	h	h	h	b	h	b	a	h	h	h	h
Block67845	Chr.8	10526800	10534181	b	h	h	h	h	a	b	a	a	a	b	b	h	a	a	a	h	b	b	a	h	b	h	b	h	h	b	b	a	a	h	a	h	b	h	a	h	h	b	h	b	a	a	h	h	a
Block67855	Chr.8	10539611	10550848	b	a	h	h	h	a	b	a	a	h	b	b	h	a	a	a	h	b	b	a	a	b	h	b	h	h	b	b	h	a	h	a	h	b	a	a	h	h	b	h	b	a	h	h	h	h
Block68010	Chr.8	10597084	10667155	b	a	h	a	h	a	b	a	a	h	b	b	h	a	a	a	h	b	b	a	h	b	h	b	h	h	b	b	h	a	h	a	h	b	h	a	h	h	b	h	b	a	h	h	h	h
Block68016	Chr.8	10680929	10686079	b	h	h	a	h	a	b	a	a	h	b	b	h	a	a	a	h	b	b	a	h	b	h	b	h	h	b	b	h	a	h	a	h	b	h	h	h	h	b	h	b	h	h	h	a	h
Block68034	Chr.8	10732199	10737210	b	h	h	h	h	a	b	a	a	h	b	b	h	a	a	a	h	b	b	a	h	b	h	b	h	a	b	b	h	a	h	a	h	b	h	h	h	h	b	h	b	h	h	h	a	a
Block68038	Chr.8	10746817	10755044	b	h	h	h	h	a	b	a	a	h	b	b	h	a	a	a	h	b	b	a	h	b	h	b	h	a	b	b	h	a	h	a	h	b	h	h	h	h	b	h	b	h	h	h	h	a
Block68039	Chr.8	10757465	10773538	b	h	h	h	h	a	b	a	a	h	b	b	h	a	a	a	h	b	b	a	h	b	h	b	h	a	b	b	h	a	h	a	h	b	h	h	h	h	b	h	b	h	h	h	h	a
Block68040	Chr.8	10773619	10782673	b	h	h	h	h	a	b	a	a	h	b	b	h	a	a	a	h	b	b	a	h	b	h	b	h	h	b	h	h	a	h	a	a	b	h	h	h	h	b	h	b	a	h	a	h	h
Block68182	Chr.8	10887401	10898491	b	h	h	h	a	a	b	a	a	h	b	b	h	a	a	a	a	b	b	a	h	b	h	b	a	h	b	h	h	a	h	a	h	b	a	a	h	h	b	h	b	a	h	a	h	h
Block68266	Chr.8	10943142	10960261	b	h	h	h	h	a	b	a	a	h	b	b	h	a	a	a	h	b	b	a	h	b	h	b	h	h	b	h	h	a	h	a	h	b	h	h	h	h	b	a	b	h	h	a	h	h
Block68289	Chr.8	10974190	10985001	b	h	h	h	h	a	b	a	a	h	b	b	h	a	a	a	h	b	b	a	h	b	h	b	h	h	b	h	h	a	h	a	h	b	h	h	h	h	b	a	b	h	h	a	h	h
Block68297	Chr.8	10988891	11023368	b	h	h	h	h	a	b	a	a	h	b	b	h	a	a	a	h	b	b	a	h	b	h	b	a	h	b	a	h	a	a	a	a	b	h	a	a	h	b	h	b	a	h	a	h	h
Block68363	Chr.8	11032204	11046876	b	h	h	h	h	a	b	a	a	a	b	b	h	a	a	a	h	b	b	a	a	b	h	b	a	h	b	h	h	a	a	a	h	b	h	h	h	h	b	h	b	h	h	a	a	h
Block68625	Chr.8	11175322	11183922	b	a	h	h	h	a	b	a	a	h	b	b	h	a	a	a	h	b	b	a	h	b	h	b	a	h	b	a	h	a	a	a	h	b	h	h	h	h	b	h	b	a	h	a	a	h
Block68632	Chr.8	11185940	11195457	b	a	h	h	h	a	b	a	a	h	b	b	h	a	a	a	h	b	h	a	h	b	h	b	h	h	b	h	h	a	h	a	h	b	h	a	h	h	b	h	b	h	h	a	h	a
Block70988	Chr.8	12678252	12686289	b	h	h	h	h	a	b	a	a	h	b	b	h	a	a	a	h	b	h	a	h	b	h	b	a	a	b	a	h	a	h	a	h	b	h	h	h	h	b	a	b	h	a	a	h	h
Block72320	Chr.8	13677405	13686089	b	h	a	h	h	a	b	a	a	a	b	b	h	a	a	a	h	b	a	a	h	b	h	b	h	h	b	h	h	a	a	a	a	b	h	a	h	h	b	h	b	h	h	a	h	h
Block72362	Chr.8	13701687	13707711	b	h	h	h	h	a	b	a	a	h	b	b	h	a	a	a	h	b	h	a	h	b	h	b	h	h	b	h	h	a	h	a	h	b	h	h	h	h	b	h	b	h	h	a	h	h
Block72423	Chr.8	13748162	13753203	b	h	h	h	h	a	b	a	a	h	b	b	h	a	a	a	h	b	h	a	h	b	h	b	h	h	b	h	h	a	h	a	h	b	h	h	h	h	b	h	b	h	h	a	h	h
Block72424	Chr.8	13753793	13761600	b	h	h	h	h	a	b	a	a	h	b	b	h	a	a	a	h	b	h	a	h	b	h	b	h	h	b	a	h	a	h	a	h	b	h	h	h	h	b	h	b	h	h	a	h	h
Block72511	Chr.8	13782832	13791183	b	a	h	h	h	a	b	a	a	h	b	b	h	a	a	a	a	b	h	a	h	b	h	b	h	h	b	h	h	a	h	a	h	b	h	a	h	h	b	h	b	a	h	a	a	h
Block72537	Chr.8	13800464	13808581	b	h	h	h	h	a	b	a	a	h	b	b	h	a	a	a	h	b	h	a	h	b	h	b	h	h	b	h	h	a	h	a	h	b	h	a	h	h	b	h	b	h	h	a	h	h
Block72596	Chr.8	13832278	13837785	b	h	h	h	h	a	b	a	a	h	b	b	h	a	a	a	h	b	h	a	h	b	h	b	h	h	b	h	h	a	h	a	h	b	h	h	h	h	b	h	b	h	h	a	h	h
Block72772	Chr.8	13901197	13906610	b	h	h	h	h	a	b	a	a	h	b	b	h	a	a	a	h	b	h	a	h	b	a	b	h	h	b	h	h	a	h	a	h	b	h	h	h	a	b	h	b	h	h	a	h	a
Block72786	Chr.8	13921702	13939232	b	h	h	h	h	a	b	a	a	h	b	b	h	a	a	a	h	b	h	a	h	b	a	b	h	h	b	h	h	a	h	a	h	b	h	h	h	h	b	h	b	h	h	a	a	h
Block72791	Chr.8	13941936	13950989	b	h	h	h	h	a	b	a	a	h	b	b	h	a	a	a	h	b	h	a	h	b	a	b	h	h	b	h	h	a	h	a	h	b	h	h	h	h	b	h	b	h	h	a	a	h
Block72794	Chr.8	13952018	13957644	b	h	h	h	h	a	b	a	a	h	b	b	h	a	a	a	h	b	h	a	h	b	h	b	h	a	b	h	h	a	h	a	h	b	h	h	h	h	b	h	b	h	h	a	h	h
Block72841	Chr.8	13978789	13987946	b	h	h	h	h	a	b	a	a	h	b	b	h	a	a	a	h	b	h	a	h	b	h	b	h	h	b	h	h	a	h	a	a	b	h	h	h	a	b	h	b	h	h	a	a	h
Block72953	Chr.8	14044790	14053187	b	h	h	h	h	a	b	a	a	h	b	b	h	a	a	a	h	b	h	a	h	b	h	b	h	h	b	h	h	a	h	a	h	b	h	h	h	h	b	h	b	a	h	a	h	h
Block72990	Chr.8	14073524	14078680	b	h	h	h	h	a	b	a	a	h	b	b	h	a	a	a	h	b	h	a	h	b	h	b	h	h	b	a	h	a	h	a	h	b	h	h	h	h	b	h	b	h	h	a	h	h
Block73081	Chr.8	14111868	14117590	b	h	h	h	h	a	b	a	a	h	b	b	h	a	a	a	h	b	h	a	h	b	h	b	h	h	b	h	h	a	h	a	h	b	h	h	h	a	b	h	b	h	h	a	a	h
Block73126	Chr.8	14173008	14179570	b	a	h	h	h	a	b	a	a	h	b	b	h	a	a	a	h	b	a	a	h	b	h	b	h	h	b	h	h	a	h	a	h	b	h	h	h	h	b	h	b	h	h	a	h	h
Block73197	Chr.8	14209473	14226918	b	h	h	h	h	a	b	a	a	a	b	b	h	a	a	a	h	b	h	a	h	b	h	b	h	h	b	a	h	a	a	a	h	b	h	h	h	a	b	h	b	h	a	a	h	h
Block73227	Chr.8	14253451	14258606	b	h	h	h	h	a	b	a	a	a	b	b	h	a	a	a	h	b	h	a	h	b	h	b	h	h	b	a	h	a	a	a	h	b	h	h	h	h	b	h	b	h	h	a	h	h
Block73233	Chr.8	14261378	14266717	b	h	h	h	h	a	b	a	a	h	b	b	h	a	a	a	h	b	h	a	h	b	h	b	h	h	b	h	h	a	h	a	h	b	h	h	h	h	b	h	b	h	h	a	h	h
Block73379	Chr.8	14330136	14339741	b	h	h	h	h	a	b	a	a	h	b	b	h	a	a	a	h	b	h	a	h	b	h	b	h	h	b	a	h	a	h	a	h	b	h	h	a	h	b	h	b	h	h	a	h	h
Block73396	Chr.8	14357202	14376851	b	h	h	h	h	a	b	a	a	h	b	b	h	a	a	a	h	b	h	a	h	b	h	b	h	h	b	h	h	a	a	a	h	b	h	h	h	h	b	h	b	h	h	a	a	h
Block73429	Chr.8	14394648	14404050	b	h	h	h	h	a	b	a	a	h	b	b	h	a	a	a	h	b	h	a	a	b	a	b	h	h	b	h	h	a	h	a	h	b	h	h	h	h	b	h	b	h	h	a	h	h
Block73487	Chr.8	14490766	14498149	b	h	h	h	h	a	b	a	a	h	b	b	h	a	a	a	h	b	h	a	h	b	h	b	h	h	b	h	h	a	h	a	h	b	h	h	h	h	b	h	b	h	h	a	h	h
Block73492	Chr.8	14498811	14508960	b	h	h	h	h	a	b	a	a	h	b	b	h	a	a	a	h	b	h	a	h	b	h	b	h	h	b	h	h	a	h	a	h	b	a	h	h	h	b	h	b	h	h	a	h	h
Block73495	Chr.8	14512224	14517795	b	h	h	h	h	a	b	a	a	h	b	b	h	a	a	a	h	b	h	a	h	b	h	b	h	h	b	h	h	a	h	a	h	b	h	h	h	h	b	h	b	h	a	a	h	h
Block73578	Chr.8	14592992	14600429	b	h	h	h	h	a	b	a	a	h	b	b	h	a	a	a	h	b	h	a	h	b	h	b	h	h	b	h	h	a	h	a	h	b	h	h	h	h	b	a	b	h	h	a	h	h
Block73583	Chr.8	14606371	14618036	b	h	a	h	h	a	b	a	a	h	b	b	h	a	a	a	h	b	h	a	h	b	h	b	h	h	b	h	h	a	h	a	h	b	h	h	h	h	b	h	b	h	h	a	h	h
Block73589	Chr.8	14621520	14628051	b	h	h	h	h	a	b	a	a	h	b	b	h	a	a	a	h	b	h	a	h	b	h	b	h	h	b	h	h	a	h	a	h	b	h	h	h	h	b	h	b	h	h	a	h	h
Block73590	Chr.8	14628119	14633581	b	h	h	h	h	a	b	a	a	h	b	b	h	a	a	a	h	b	h	a	h	b	h	b	h	h	b	h	h	a	h	a	h	b	h	a	h	h	b	h	b	h	h	a	h	h
Block73623	Chr.8	14661367	14675568	b	h	h	h	h	a	b	a	a	h	b	b	h	a	a	a	h	b	h	a	h	b	h	b	h	a	b	h	a	a	h	a	h	b	h	h	h	h	b	h	b	h	h	a	h	a
Block73685	Chr.8	14709842	14720408	b	h	h	h	h	a	b	a	a	h	b	b	h	a	a	a	h	b	h	a	h	b	h	b	h	h	b	h	h	a	a	a	h	b	h	h	h	h	b	h	b	h	h	a	h	h
Block73734	Chr.8	14754047	14763992	b	a	h	h	h	a	b	a	a	a	b	b	h	a	a	a	h	b	h	a	h	b	h	b	a	h	b	h	h	a	h	a	h	b	h	a	h	h	b	a	b	h	h	a	h	h
Block73828	Chr.8	14807946	14817546	b	h	h	h	h	a	b	a	a	a	b	b	h	a	a	a	h	b	h	a	h	b	h	b	h	h	b	h	h	a	h	a	h	b	h	h	h	h	b	h	b	a	h	a	h	h
Block73843	Chr.8	14828438	14837020	b	h	h	h	h	a	b	a	a	h	b	b	h	a	a	a	h	b	h	a	a	b	h	b	a	a	b	h	h	a	h	a	h	b	a	h	h	h	b	h	b	h	a	a	h	a
Block73878	Chr.8	14871866	14881052	b	h	h	a	h	a	b	a	a	h	b	b	h	a	a	a	h	b	h	a	a	b	h	b	h	h	b	h	h	a	h	a	h	b	h	h	h	h	b	h	b	h	h	a	h	h
Block73890	Chr.8	14884956	14896950	b	h	h	h	h	a	b	a	a	h	b	b	h	a	a	a	a	b	h	a	h	b	h	b	h	h	b	a	h	a	h	a	h	b	h	h	h	h	b	h	b	h	h	a	a	a
Block73921	Chr.8	14912755	14920263	b	h	h	h	h	a	b	a	a	h	b	b	h	a	a	a	h	b	h	a	h	b	h	b	h	h	b	h	h	a	h	a	h	b	h	h	h	h	b	h	b	h	h	a	h	h
Block74059	Chr.8	14990776	15130295	b	h	h	h	h	a	b	a	a	h	b	b	h	a	a	a	h	b	h	a	h	b	h	b	h	h	b	h	h	a	h	a	h	b	h	h	h	h	b	h	b	h	h	a	h	h
Block74060	Chr.8	15130323	15135384	b	h	h	h	h	a	b	a	a	h	b	b	h	a	a	a	h	b	h	a	h	b	h	b	h	h	b	h	h	a	h	a	h	b	h	h	h	h	b	h	b	h	h	a	h	h
Block74062	Chr.8	15136088	15145492	b	h	h	h	h	a	b	a	a	h	b	b	h	a	a	a	h	b	h	a	h	b	h	b	h	h	b	h	h	a	h	a	h	b	h	h	h	h	b	h	b	h	h	a	h	h
Block74063	Chr.8	15145512	15175118	b	h	h	h	h	a	b	a	a	a	b	b	h	a	a	a	h	b	h	a	h	b	h	b	h	h	b	h	h	a	h	a	h	b	h	h	h	h	b	h	b	h	h	a	h	h
Block74066	Chr.8	15177614	15184726	b	h	h	h	h	a	b	a	a	a	b	b	h	a	a	a	h	b	a	a	h	b	h	b	h	h	b	h	h	a	h	a	h	b	h	h	h	h	b	h	b	h	h	a	h	a
Block74074	Chr.8	15190961	15198587	b	h	h	h	h	a	b	a	a	h	b	b	h	a	a	a	h	b	h	a	h	b	h	b	h	h	b	h	h	a	h	a	h	b	h	h	h	h	b	h	b	h	h	a	h	a
Block74098	Chr.8	15207839	15235233	b	a	h	h	h	a	b	a	a	h	b	b	h	a	a	a	a	b	h	a	h	b	h	b	h	h	b	h	h	a	a	a	h	b	h	h	a	h	b	h	b	h	h	a	h	h
Block74203	Chr.8	15307299	15313572	b	a	a	h	h	a	b	a	a	h	b	b	h	a	a	a	h	b	h	a	h	b	h	b	h	a	b	h	h	a	h	a	h	b	h	h	h	h	b	h	b	h	h	a	h	h
Block74270	Chr.8	15373469	15387856	b	h	h	a	h	a	b	a	a	h	b	b	h	a	a	a	h	b	h	a	h	b	h	b	h	h	b	h	h	a	h	a	h	b	h	h	a	h	b	h	b	h	h	a	h	h
Block74314	Chr.8	15431478	15447674	b	h	h	h	h	a	b	a	a	h	b	b	h	a	a	a	h	b	h	a	h	b	h	b	h	h	b	h	h	a	h	a	h	b	h	h	h	h	b	h	b	h	a	a	h	h
Block74321	Chr.8	15461811	15467612	b	h	h	h	h	a	b	a	a	h	b	b	h	a	a	a	h	b	h	a	h	b	h	b	a	h	b	h	h	a	h	a	h	b	h	h	h	h	b	h	b	h	h	a	h	h
Block74334	Chr.8	15481982	15511588	b	h	h	h	h	a	b	a	a	h	b	b	h	a	a	a	h	b	h	a	h	b	h	b	h	h	b	h	h	a	h	a	h	b	h	h	h	h	b	h	b	h	h	a	h	h
Block74335	Chr.8	15512362	15532164	b	h	h	h	h	a	b	a	a	h	b	b	h	a	a	a	h	b	h	a	h	b	h	b	h	h	b	a	h	a	a	a	h	b	h	h	h	h	b	h	b	h	h	a	h	h
Block74384	Chr.8	15586630	15594198	b	h	h	h	h	a	b	a	a	h	b	b	h	a	a	a	h	b	h	a	h	b	h	b	h	h	b	h	h	a	h	a	h	b	h	h	h	h	b	h	b	h	h	a	h	h
Block74414	Chr.8	15627927	15651665	b	h	h	h	h	a	b	a	a	a	b	b	h	a	a	a	h	b	h	a	h	b	h	b	a	h	b	a	h	a	h	a	h	b	h	h	h	h	b	h	b	h	h	a	h	h
Block74425	Chr.8	15668077	15675508	b	h	h	h	h	a	b	a	a	h	b	b	h	a	a	a	h	b	h	a	h	b	h	b	h	h	b	h	h	a	h	a	h	b	h	h	h	h	b	h	b	a	h	a	h	h
Block74434	Chr.8	15682722	15695276	b	h	h	h	h	a	b	a	a	h	b	b	h	a	a	a	h	b	a	a	h	b	h	b	h	a	b	h	h	a	a	a	h	b	h	h	h	h	b	h	b	h	h	a	h	h
Block74477	Chr.8	15734859	15740338	b	h	h	h	h	a	b	a	a	h	b	b	h	a	a	a	h	b	a	a	h	b	h	b	h	h	b	h	h	a	h	a	h	b	h	h	h	h	b	h	b	h	h	a	h	h
Block74487	Chr.8	15751110	15758830	b	h	h	h	h	a	b	a	a	h	b	b	h	a	a	a	h	b	h	a	h	b	h	b	h	h	b	h	h	a	h	a	h	b	h	h	h	h	b	h	b	h	h	a	h	h
Block74503	Chr.8	15775576	15787234	b	h	h	h	h	a	b	a	a	h	b	b	a	a	a	a	h	b	h	a	h	b	h	b	h	h	b	h	h	a	h	a	h	b	h	a	h	h	b	h	b	h	a	a	h	h
Block74536	Chr.8	15809051	15819087	b	a	a	a	h	a	b	a	a	h	b	b	h	a	a	a	h	b	h	a	h	b	h	b	h	h	b	h	h	a	h	a	h	b	h	a	h	h	b	h	b	h	h	a	h	h
Block74563	Chr.8	15832334	15841113	b	h	h	h	h	a	b	a	a	h	b	b	h	a	a	a	h	b	a	a	h	b	h	b	h	h	b	h	h	a	h	a	h	b	h	a	h	a	b	h	b	h	h	a	h	h
Block74586	Chr.8	15854047	15870221	b	h	h	h	a	a	b	a	a	h	b	b	h	a	a	a	h	b	h	a	h	b	h	b	h	h	b	h	h	a	h	a	h	b	h	h	h	h	b	h	b	h	h	a	h	h
Block74621	Chr.8	15923927	15937248	b	h	h	h	h	a	b	a	a	h	b	b	h	a	a	a	h	b	h	a	h	b	h	b	h	h	b	h	h	a	h	a	h	b	h	h	h	h	b	h	b	a	h	a	h	h
Block74642	Chr.8	15973886	15979605	b	h	h	h	h	a	b	a	a	h	b	b	h	a	a	a	h	b	h	a	h	b	h	b	h	h	b	h	h	a	h	a	a	b	h	h	h	h	b	h	b	h	h	a	h	h
Block74782	Chr.8	16036652	16041820	b	h	h	h	h	a	b	a	a	h	b	b	h	a	a	a	h	b	h	a	h	b	h	b	h	h	b	h	h	a	h	a	h	b	h	h	h	h	b	h	b	h	h	a	h	h
Block74787	Chr.8	16045105	16051042	b	h	h	h	h	a	b	a	a	a	b	b	h	a	a	a	h	b	h	a	h	b	h	b	h	a	b	a	h	a	h	a	h	b	h	a	h	h	b	h	b	h	h	a	h	h
Block74882	Chr.8	16163851	16183630	b	h	h	h	h	a	b	a	a	h	b	b	h	a	a	a	h	b	h	a	h	b	h	b	h	h	b	a	h	a	h	a	h	b	h	h	h	h	b	h	b	h	h	a	h	h
Block74889	Chr.8	16186889	16196045	b	h	h	h	h	a	b	a	a	a	b	b	h	a	a	a	h	b	h	a	h	b	h	b	h	h	b	h	h	a	h	a	h	b	h	h	a	a	b	a	b	h	h	a	a	h
Block74988	Chr.8	16244614	16272393	b	a	h	h	h	a	b	a	a	h	b	b	h	a	a	a	h	b	h	a	h	b	h	b	h	a	b	h	h	a	h	a	h	b	h	h	h	h	b	h	b	h	h	a	h	h
Block75080	Chr.8	16348443	16353757	b	h	h	h	h	a	b	a	a	h	b	b	h	a	a	a	h	b	h	a	h	b	h	b	h	h	b	h	h	a	h	a	h	b	h	h	h	h	b	h	b	h	h	a	h	h
Block75084	Chr.8	16357615	16364007	b	h	h	h	h	a	b	a	a	h	b	b	h	a	a	a	h	b	h	a	h	b	h	b	h	h	b	h	h	a	h	a	h	b	h	h	a	h	b	h	b	h	h	a	h	h
Block75199	Chr.8	16448879	16454248	b	h	h	h	h	a	b	a	a	a	b	b	h	a	a	a	h	b	h	a	h	b	h	b	a	h	b	h	h	a	h	a	h	b	h	h	h	h	b	h	b	h	a	a	a	h
Block75257	Chr.8	16491485	16510736	b	h	a	h	h	a	b	a	a	h	b	b	h	a	a	a	h	b	h	a	h	b	h	b	h	h	b	h	h	a	h	a	h	b	h	h	h	h	b	h	b	h	h	a	h	h
Block75289	Chr.8	16543056	16549449	b	h	h	h	h	a	b	a	a	h	b	b	h	a	a	a	a	b	h	a	h	b	h	b	h	h	b	h	h	a	h	a	h	b	h	h	h	h	b	h	b	a	h	a	h	h
Block75302	Chr.8	16557361	16563544	b	h	h	h	h	a	b	a	a	h	b	b	h	a	a	a	h	b	h	a	h	b	h	b	h	h	b	h	h	a	h	a	h	b	h	h	h	h	b	h	b	h	h	a	h	h
Block75363	Chr.8	16611896	16619122	b	h	h	h	h	a	b	a	a	h	b	b	h	a	a	a	h	b	h	a	h	b	h	b	h	h	b	h	h	a	h	a	h	b	h	h	h	h	b	h	b	h	h	a	h	h
Block75464	Chr.8	16712451	16750046	b	h	h	h	h	a	b	a	a	h	b	b	h	a	a	a	h	b	h	a	h	b	h	b	h	h	b	h	h	a	h	a	h	b	h	a	h	h	b	h	b	h	h	a	h	h
Block75467	Chr.8	16753039	16781554	b	a	h	h	h	a	b	a	a	h	b	b	h	a	a	a	h	b	h	a	h	b	h	b	h	h	b	h	h	a	h	a	h	b	h	h	h	h	b	h	b	h	h	a	h	h
Block75704	Chr.8	16925480	16930671	b	h	h	h	h	a	b	a	a	h	b	b	h	a	a	a	h	b	h	a	h	b	h	b	h	a	b	h	h	a	a	a	h	b	h	h	h	h	b	h	b	h	h	a	h	h
Block75816	Chr.8	17218106	17293095	b	h	h	h	h	a	b	a	a	h	b	b	h	a	a	a	h	b	h	a	h	b	h	b	h	h	b	h	h	a	h	a	h	b	h	h	h	h	b	h	b	h	h	a	h	h
Block75820	Chr.8	17300201	17329908	b	h	h	h	h	a	b	a	a	h	b	b	h	a	a	a	h	b	h	a	h	b	h	b	h	h	b	h	h	a	h	a	h	b	h	h	a	h	b	h	b	h	h	a	h	h
Block75823	Chr.8	17335543	17342624	b	h	h	h	h	a	b	a	a	h	b	b	h	a	a	a	h	b	h	a	h	b	h	b	h	h	b	a	h	a	h	a	a	b	h	a	h	h	b	h	b	h	h	a	h	h
Block76003	Chr.8	17467209	17475542	b	h	h	h	h	a	b	a	a	h	b	b	h	a	a	a	h	b	h	a	h	b	h	b	h	a	b	a	h	a	h	a	h	b	a	h	h	h	b	a	b	h	h	a	h	a
Block76082	Chr.8	17547562	17556210	b	h	h	h	h	a	b	a	a	a	b	b	h	a	a	a	h	b	h	a	h	b	h	b	h	h	b	h	h	a	h	a	h	b	a	h	h	h	b	h	b	h	h	a	h	h
Block76102	Chr.8	17580205	17586241	b	h	h	h	h	a	b	a	a	a	b	b	h	a	a	a	a	b	h	a	h	b	h	b	h	a	b	h	h	a	h	a	a	b	a	h	a	h	b	h	b	a	h	a	a	h
Block76123	Chr.8	17594819	17600280	b	h	h	h	h	a	b	a	a	a	b	b	h	a	a	a	a	b	h	a	h	b	a	b	h	a	b	h	h	a	a	a	a	b	a	h	a	h	b	h	b	a	h	a	a	h
Block76126	Chr.8	17602642	17609619	b	h	h	h	h	a	b	a	a	h	b	b	h	a	a	a	h	b	h	a	h	b	h	b	h	h	b	h	h	a	h	a	h	b	h	a	a	h	b	h	b	h	h	a	h	h
Block76270	Chr.8	17723406	17730303	b	h	h	h	h	a	b	a	a	h	b	b	h	a	a	a	h	b	h	a	h	b	h	b	h	h	b	h	h	a	h	a	h	b	h	h	h	h	b	h	b	h	a	a	h	h
Block76323	Chr.8	17760529	17790737	b	a	h	a	h	a	b	a	a	h	b	b	h	a	a	a	h	b	h	a	h	b	h	b	h	h	b	a	h	a	h	a	h	b	h	h	h	h	b	h	b	h	h	a	h	h
Block76328	Chr.8	17791236	17797675	b	a	h	a	h	a	b	a	a	h	b	b	h	a	a	a	h	b	h	a	h	b	h	b	h	h	b	a	h	a	h	a	h	b	h	h	h	h	b	h	b	h	h	a	h	h
Block76334	Chr.8	17799263	17806114	b	a	h	h	h	a	b	a	a	a	b	b	h	a	a	a	h	b	h	a	h	b	a	b	a	h	b	h	h	a	a	a	h	b	h	h	h	h	b	h	b	h	h	a	h	h
Block76344	Chr.8	17812596	17834088	b	h	h	a	h	a	b	a	a	h	b	b	h	a	a	a	h	b	h	a	h	b	h	b	h	h	b	a	h	a	h	a	h	b	h	h	h	h	b	h	b	h	h	a	h	h
Block76358	Chr.8	17847286	17857720	b	h	h	h	h	a	b	a	a	h	b	b	a	a	a	a	h	b	h	a	h	b	h	b	h	h	b	h	a	a	a	a	h	b	h	h	h	h	b	h	b	h	h	a	h	h
Block76375	Chr.8	17872807	17880582	b	a	h	h	h	a	b	a	a	h	b	b	h	a	a	a	h	b	h	a	h	b	h	b	h	h	b	h	a	a	a	a	h	b	h	h	h	h	b	h	b	h	h	a	h	h
Block76378	Chr.8	17881864	17901761	b	a	h	h	h	a	b	a	a	h	b	b	h	a	a	a	h	b	h	a	h	b	h	b	h	h	b	h	h	a	h	a	h	b	h	h	a	h	b	h	b	h	h	a	h	a
Block76465	Chr.8	17959926	17967059	b	h	h	a	h	a	b	a	a	a	b	b	h	a	a	a	h	b	h	a	h	b	h	b	a	h	b	a	h	a	a	a	h	b	h	h	h	h	b	a	b	h	h	a	h	h
Block76542	Chr.8	17990991	18003649	b	h	h	h	h	a	b	a	a	h	b	b	h	a	a	a	h	b	h	a	h	b	h	b	h	h	b	h	h	a	h	a	h	b	h	h	a	h	b	h	b	h	a	a	h	h
Block76584	Chr.8	18034514	18048973	b	h	h	h	h	a	b	a	a	h	b	b	h	a	a	a	h	b	h	a	h	b	h	b	h	h	b	h	h	a	h	a	h	b	h	h	h	h	b	h	b	h	h	a	h	h
Block76611	Chr.8	18076082	18082121	b	h	h	h	h	a	b	a	a	h	b	b	h	a	a	a	h	b	h	a	h	b	h	b	h	h	b	h	h	a	h	a	h	b	h	h	a	h	b	a	b	a	h	a	h	h
Block76638	Chr.8	18112397	18123328	b	h	h	h	a	a	b	a	a	h	b	b	h	a	a	a	h	b	h	a	h	b	h	b	h	h	b	a	h	a	h	a	h	b	h	a	h	h	b	h	b	h	a	a	h	h
Block76687	Chr.8	18145946	18151778	b	h	h	h	a	a	b	a	a	h	b	b	h	a	a	a	h	b	h	a	h	b	h	b	h	h	b	h	h	a	h	a	h	b	h	h	h	h	b	h	b	h	h	a	a	h
Block76713	Chr.8	18166524	18178604	b	h	h	a	h	a	b	a	a	h	b	b	h	a	a	a	h	b	h	a	h	b	h	b	h	h	b	h	h	a	h	a	h	b	h	a	h	h	b	h	b	h	h	a	a	h
Block76778	Chr.8	18237231	18242616	b	h	h	h	a	a	b	a	a	h	b	b	h	a	a	a	h	b	h	a	h	b	a	b	h	h	b	h	h	a	a	a	h	b	h	a	h	h	b	h	b	h	h	a	h	a
Block76825	Chr.8	18273248	18283370	b	a	h	h	h	a	b	a	a	h	b	b	h	a	a	a	h	b	h	a	h	b	a	b	h	h	b	h	h	a	h	a	h	b	h	a	h	h	b	h	b	h	h	a	h	a
Block76827	Chr.8	18299744	18310422	b	a	h	h	h	a	b	a	a	h	b	b	h	a	a	a	h	b	h	a	h	b	h	b	h	h	b	h	h	a	h	a	h	b	h	h	h	h	b	h	b	h	h	a	h	h
Block76936	Chr.8	18366505	18375188	b	h	h	h	h	a	b	a	a	h	b	b	h	a	a	a	h	b	h	a	h	b	h	b	h	h	b	h	h	a	h	a	h	b	h	h	h	h	b	h	b	h	h	a	h	h
Block76940	Chr.8	18376326	18407455	b	h	h	h	h	a	b	a	a	h	b	b	h	a	a	a	h	b	h	a	h	b	h	b	h	h	b	h	h	a	h	a	h	b	h	h	h	h	b	h	b	h	h	a	h	h
Block76943	Chr.8	18407944	18431389	b	h	h	h	h	a	b	a	a	h	b	b	h	a	a	a	h	b	h	a	h	b	h	b	h	h	b	h	h	a	h	a	h	b	h	h	h	h	b	h	b	h	h	a	h	h
Block76949	Chr.8	18438321	18445542	b	h	h	h	h	a	b	a	a	h	b	b	h	a	a	a	h	b	h	a	h	b	a	b	h	a	b	h	h	a	a	a	h	b	a	a	h	a	b	h	b	h	a	a	h	h
Block76980	Chr.8	18457155	18479459	b	h	h	h	h	a	b	a	a	h	b	b	h	a	a	a	h	b	h	a	h	b	h	b	h	h	b	h	h	a	h	a	h	b	h	h	h	h	b	h	b	h	h	a	h	h
Block77021	Chr.8	18510609	18535207	b	h	h	h	h	a	b	a	a	h	b	b	h	a	a	a	h	b	h	a	a	b	h	b	h	h	b	h	h	a	a	a	h	b	h	h	h	h	b	h	b	h	h	a	h	h
Block77105	Chr.8	18588611	18596995	b	h	h	h	h	a	b	a	a	h	b	b	h	a	a	a	h	b	h	a	h	b	h	b	h	h	b	h	h	a	h	a	h	b	h	h	h	h	b	h	b	h	h	a	h	h
Block77114	Chr.8	18600345	18606496	b	h	h	h	h	a	b	a	a	h	b	b	h	a	a	a	h	b	h	a	h	b	h	b	h	h	b	h	h	a	h	a	a	b	h	h	h	a	b	h	b	h	h	a	h	h
Block77148	Chr.8	18637026	18650268	b	h	h	h	h	a	b	a	a	a	b	b	h	a	a	a	h	b	a	a	h	b	h	b	h	h	b	h	h	a	h	a	h	b	h	h	h	h	b	h	b	h	h	a	h	h
Block77173	Chr.8	18662679	18674529	b	h	h	h	h	a	b	a	a	h	b	b	h	a	a	a	h	b	h	a	h	b	h	b	h	h	b	h	h	a	a	a	h	b	h	h	h	h	b	a	b	h	h	a	h	h
Block77199	Chr.8	18698537	18706115	b	h	h	h	h	a	b	a	a	a	b	b	h	a	a	a	h	b	h	a	h	b	h	b	a	h	b	a	a	a	a	a	h	b	h	a	h	h	b	h	b	h	h	a	a	a
Block77240	Chr.8	18718508	18743875	b	a	h	h	h	a	b	a	a	a	b	b	h	a	a	a	h	b	h	a	h	b	h	b	a	h	b	a	a	a	a	a	h	b	h	a	h	h	b	h	b	h	h	a	a	a
Block77242	Chr.8	18744098	18753252	b	a	h	h	h	a	b	a	a	h	b	b	h	a	a	a	h	b	h	a	h	b	h	b	h	h	b	h	h	a	h	a	h	b	h	h	h	h	b	h	b	h	h	a	h	h
Block77299	Chr.8	18789531	18803547	b	h	h	h	h	a	b	a	a	h	b	b	h	a	a	a	h	b	h	a	h	b	h	b	h	h	b	h	h	a	h	a	h	b	h	h	h	h	b	h	b	h	h	a	h	h
Block77305	Chr.8	18806766	18814983	b	h	h	h	h	a	b	a	a	h	b	b	a	a	a	a	h	b	h	a	h	b	h	b	h	h	b	h	h	a	h	a	h	b	h	h	h	h	b	h	b	h	h	a	h	h
Block77316	Chr.8	18818000	18850158	b	h	h	h	h	a	b	a	a	h	b	b	h	a	a	a	h	b	h	a	h	b	h	b	h	h	b	h	h	a	h	a	h	b	h	h	h	h	h	h	b	h	h	a	h	h
Block77363	Chr.8	18886574	18893586	b	h	a	h	h	a	b	a	a	h	b	b	h	a	a	a	h	b	h	a	h	b	h	b	h	a	b	h	h	a	h	a	h	b	h	h	h	h	b	h	b	h	h	a	h	h
Block77400	Chr.8	18923350	18929316	b	h	h	h	h	a	b	a	a	h	b	b	h	a	a	a	h	b	h	a	h	b	a	b	h	h	b	h	h	a	h	a	h	b	h	h	h	h	b	h	b	a	h	a	h	h
Block77451	Chr.8	18956515	18962471	b	h	h	h	h	a	b	a	a	h	b	b	h	a	a	a	h	b	h	a	h	b	h	b	a	h	b	h	h	a	h	a	h	b	h	a	h	h	b	h	b	h	h	a	h	h
Block77472	Chr.8	18976707	18985907	b	h	h	h	h	a	b	a	a	h	b	b	h	a	a	a	h	b	h	a	h	b	h	b	a	h	b	h	h	a	h	a	h	b	h	a	h	h	b	h	b	h	h	a	h	h
Block77474	Chr.8	18987570	18998719	b	h	h	h	h	a	b	a	a	h	b	b	h	a	a	a	h	b	h	a	h	b	h	b	a	h	b	h	h	a	h	a	h	b	a	h	a	a	b	h	b	h	h	a	h	h
Block77548	Chr.8	19030422	19042684	b	h	h	h	h	a	b	a	a	h	b	b	h	a	a	a	h	b	h	a	h	b	h	b	a	h	b	h	h	a	h	a	h	b	a	h	a	a	b	h	b	h	h	a	h	h
Block77549	Chr.8	19042702	19049256	b	h	h	h	h	a	b	a	a	h	b	b	h	a	a	a	h	b	h	a	h	b	h	b	h	h	b	h	h	a	h	a	h	b	h	h	h	h	b	h	b	h	h	a	h	h
Block77563	Chr.8	19057699	19066402	b	h	h	h	h	a	b	a	a	h	b	b	h	a	a	a	h	b	h	a	h	b	h	b	h	h	b	h	h	a	h	a	h	b	h	h	a	a	b	h	b	h	h	a	h	h
Block77589	Chr.8	19083182	19091817	b	h	h	h	h	a	b	a	a	h	b	b	h	a	a	a	h	b	h	a	h	b	h	b	a	h	b	h	h	a	h	a	h	b	h	h	h	h	b	h	b	h	h	a	h	h
Block77706	Chr.8	19167376	19173977	b	h	h	h	h	a	b	a	a	h	b	b	h	a	a	a	h	b	h	a	h	b	h	b	h	h	b	h	h	a	h	a	h	b	h	h	h	h	b	h	b	h	h	a	h	h
Block77712	Chr.8	19180067	19192644	b	h	h	h	h	a	b	a	a	h	b	b	h	a	a	a	h	b	h	a	h	b	h	b	h	h	b	h	h	a	h	a	h	b	h	h	h	h	b	h	b	h	h	a	h	h
Block77715	Chr.8	19199342	19214765	b	h	h	h	h	a	b	a	a	h	b	b	h	a	a	a	h	b	h	a	h	b	h	b	a	h	b	h	h	a	h	a	h	b	h	h	h	h	b	h	b	h	h	a	h	h
Block77718	Chr.8	19216165	19225180	b	h	h	h	h	a	b	a	a	h	b	b	h	a	a	a	h	b	h	a	h	b	h	b	a	h	b	h	h	a	h	a	h	b	h	h	h	h	b	h	b	h	h	a	h	h
Block77719	Chr.8	19225272	19232953	b	h	h	h	h	a	b	a	a	h	b	b	h	a	a	a	h	b	h	a	h	b	h	b	h	h	b	h	h	a	h	a	h	b	h	h	h	h	b	h	b	h	h	a	h	h
Block77723	Chr.8	19239361	19262117	b	h	h	h	h	a	b	a	a	h	b	b	h	a	a	a	h	b	h	a	h	b	h	b	h	h	b	h	h	a	h	a	h	b	h	h	h	h	b	h	b	h	h	a	h	h
Block77724	Chr.8	19262570	19280525	b	h	h	h	h	a	b	a	a	h	b	b	h	a	a	a	h	b	h	a	h	b	h	b	h	h	b	h	h	a	h	a	h	b	h	h	h	h	b	h	b	h	h	a	h	h
Block77725	Chr.8	19280871	19285965	b	h	h	h	h	a	b	a	a	h	b	b	h	a	a	a	h	b	h	a	h	b	h	b	h	h	b	h	h	a	h	a	h	b	h	h	h	h	b	h	b	h	h	a	h	h
Block77726	Chr.8	19286141	19307457	b	h	h	h	h	a	b	a	a	h	b	b	h	a	a	a	h	b	h	a	h	b	h	b	h	h	b	h	h	a	h	a	h	b	h	h	h	h	b	h	b	h	h	a	h	h
Block77732	Chr.8	19324976	19352328	b	h	h	h	h	a	b	a	a	h	b	b	h	a	a	a	h	b	h	a	h	b	h	b	h	h	b	h	h	a	h	a	h	b	h	h	h	h	b	h	b	h	h	a	h	h
Block77734	Chr.8	19352894	19367157	b	h	h	h	h	a	b	a	a	h	b	b	h	a	a	a	h	b	h	a	h	b	h	b	h	h	b	a	h	a	h	a	h	b	h	h	h	h	b	h	b	h	h	a	h	h
Block77736	Chr.8	19368558	19388197	b	h	h	h	h	a	b	a	a	h	b	b	h	a	a	a	h	b	h	a	h	b	h	b	h	h	b	a	h	a	h	a	h	b	h	h	h	h	b	h	b	h	h	a	h	h
Block77739	Chr.8	19392019	19410282	b	h	h	h	h	a	b	a	a	h	b	b	h	a	a	a	h	b	h	a	h	b	h	b	h	h	b	h	h	a	h	a	h	b	h	h	h	h	b	h	b	h	h	a	h	h
Block77742	Chr.8	19414150	19446714	b	h	h	h	h	a	b	a	a	h	b	b	h	a	a	a	h	b	h	a	h	b	h	b	h	h	b	h	h	a	h	a	h	b	h	h	h	h	b	h	b	h	h	a	h	h
Block77743	Chr.8	19446773	19475654	b	h	h	h	h	a	b	a	a	h	b	b	h	a	a	a	h	b	h	a	h	b	h	b	h	h	b	h	h	a	h	a	h	b	h	a	h	h	b	h	b	h	h	a	h	h
Block77744	Chr.8	19475709	19483119	b	h	h	h	h	a	b	a	a	h	b	b	h	a	a	a	h	b	h	a	h	b	h	b	h	h	b	h	h	a	h	a	h	b	h	a	h	h	b	h	b	h	h	a	h	h
Block77745	Chr.8	19483247	19495609	b	h	h	h	h	a	b	a	a	h	b	b	h	a	a	a	h	b	h	a	h	b	h	b	h	h	b	h	h	a	h	a	h	b	h	h	h	h	b	h	b	h	h	a	h	h
Block77747	Chr.8	19500389	19506516	b	h	h	h	h	a	b	a	a	h	b	b	h	a	a	a	h	b	h	a	a	b	h	b	h	h	b	h	h	a	h	a	h	b	h	h	h	h	b	h	b	h	h	a	h	h
Block77748	Chr.8	19506715	19514086	b	h	h	h	h	a	b	a	a	h	b	b	h	a	a	a	h	b	h	a	h	b	h	b	h	h	b	h	h	a	h	a	h	b	h	h	h	h	b	h	b	h	h	a	h	a
Block77754	Chr.8	19528795	19552948	b	h	h	h	h	a	b	a	a	a	b	b	h	a	a	a	h	b	h	a	h	b	a	b	h	h	b	a	a	a	h	a	h	b	h	h	h	h	b	h	b	h	h	a	h	a
Block77760	Chr.8	19557465	19565843	b	h	h	h	h	a	b	a	a	h	b	b	h	a	a	a	h	b	h	a	h	b	h	b	h	h	b	h	a	a	h	a	h	b	h	h	a	h	b	h	b	h	h	a	h	h
Block77770	Chr.8	19575677	19589788	b	h	h	h	h	a	b	a	a	h	b	b	h	a	a	a	h	b	h	a	h	b	h	b	h	h	b	h	h	a	h	a	h	b	h	h	a	h	b	h	b	h	h	a	h	h
Block77771	Chr.8	19589893	19609113	b	h	h	h	h	a	b	a	a	h	b	b	h	a	a	a	h	b	h	a	a	b	h	b	h	h	b	h	h	a	h	a	h	b	h	h	h	h	b	h	b	h	h	a	h	h
Block77773	Chr.8	19613914	19619637	b	h	h	h	h	a	b	a	a	h	b	b	h	a	a	a	h	b	h	a	a	b	h	b	h	h	b	h	h	a	h	a	h	b	h	h	h	h	b	h	b	h	h	a	h	h
Block77775	Chr.8	19625854	19642355	b	h	h	h	h	a	b	a	a	h	b	b	h	a	a	a	h	b	h	a	h	b	h	b	h	h	b	a	h	a	h	a	h	b	h	h	h	h	b	h	b	h	h	a	h	h
Block77779	Chr.8	19647901	19663432	b	h	h	h	h	a	b	a	a	h	b	b	h	a	a	a	h	b	h	a	h	b	h	b	h	h	b	a	h	a	h	a	h	b	h	h	h	h	b	h	b	h	h	a	h	h
Block77781	Chr.8	19672829	19692427	b	h	h	h	h	a	b	a	a	h	b	b	h	a	a	a	h	b	h	a	h	b	h	b	h	h	b	a	h	a	h	a	h	b	h	h	h	h	b	h	b	h	h	a	h	h
Block77784	Chr.8	19697793	19709297	b	h	h	h	h	a	b	a	a	h	b	b	h	a	a	a	h	b	h	a	h	b	h	b	h	h	b	a	h	a	h	a	h	b	h	h	h	h	b	h	b	h	h	a	h	h
Block77785	Chr.8	19709657	19717763	b	h	h	h	h	a	b	a	a	h	b	b	h	a	a	a	h	b	h	a	h	b	h	b	h	h	b	h	h	a	h	a	h	b	h	h	h	h	b	h	b	h	h	a	h	h
Block77787	Chr.8	19719459	19737719	b	h	h	h	h	a	b	a	a	h	b	b	h	a	a	a	h	b	a	a	h	b	h	b	h	h	b	h	h	a	h	a	h	b	h	h	h	h	b	h	b	h	h	a	h	h
Block77789	Chr.8	19750076	19755528	b	h	h	h	h	a	b	a	a	h	b	b	h	a	a	a	h	b	a	a	h	b	h	b	h	h	b	h	h	a	h	a	h	b	h	h	h	h	b	h	b	h	h	a	h	h
Block77790	Chr.8	19756013	19761318	b	h	h	h	h	a	b	a	a	h	b	b	h	a	a	a	h	b	a	a	h	b	h	b	h	h	b	h	h	a	h	a	h	b	h	h	h	h	b	h	b	h	h	a	h	h
Block77792	Chr.8	19762711	19770091	b	a	h	h	h	a	b	a	a	h	b	b	h	a	a	a	h	b	h	a	h	b	h	b	h	h	b	h	h	a	h	a	h	b	h	h	h	h	b	h	b	h	h	a	h	h
Block77794	Chr.8	19778055	19790873	b	a	h	h	h	a	b	a	a	h	b	b	h	a	a	a	h	b	h	a	h	b	h	b	h	h	b	h	h	a	h	a	h	b	h	h	h	h	b	h	b	h	h	a	h	h
Block77795	Chr.8	19791377	19816727	b	a	h	h	h	a	b	a	a	h	b	b	h	a	a	a	h	b	h	a	h	b	h	b	h	h	b	h	h	a	h	a	h	b	h	h	h	h	b	h	b	h	h	a	h	h
Block77797	Chr.8	19818331	19865307	b	h	h	h	h	a	b	a	a	h	b	b	h	a	a	a	h	b	h	a	h	b	h	b	h	h	b	h	h	a	h	a	h	b	h	h	h	h	b	h	b	h	h	a	h	h
Block77799	Chr.8	19866946	19884272	b	h	h	h	h	a	b	a	a	h	b	b	h	a	a	a	h	b	h	a	h	b	h	b	h	h	b	h	h	a	h	a	h	b	h	h	h	h	b	h	b	h	h	a	h	h
Block77800	Chr.8	19886076	19898140	b	h	h	h	h	a	b	a	a	h	b	b	h	a	a	a	h	b	h	a	h	b	h	b	h	h	b	h	h	a	h	a	h	b	h	h	h	h	b	h	b	h	h	a	h	h
Block77801	Chr.8	19898555	19913909	b	h	h	h	h	a	b	a	a	h	b	b	h	a	a	a	h	b	h	a	h	b	h	b	h	h	b	h	h	a	h	a	h	b	h	h	h	h	b	h	b	h	h	a	h	h
Block77803	Chr.8	19915831	19934078	b	h	h	h	h	a	b	a	a	h	b	b	h	a	a	a	h	b	h	a	h	b	h	b	h	h	b	h	h	a	h	a	h	b	h	h	h	h	b	h	b	h	h	a	h	h
Block77805	Chr.8	19934869	19944698	b	h	h	h	h	a	b	a	a	h	b	b	h	a	a	a	h	b	h	a	h	b	h	b	h	h	b	h	h	a	h	a	h	b	h	h	h	h	b	h	b	h	h	a	h	h
Block77808	Chr.8	19953225	19959972	b	h	h	h	h	a	b	a	a	h	b	b	h	a	a	a	h	b	h	a	h	b	h	b	h	h	b	h	h	a	h	a	h	b	h	h	h	h	b	h	b	h	h	a	h	h
Block77829	Chr.8	19983599	19990787	b	h	h	h	h	a	b	a	a	h	b	b	h	a	a	a	h	b	h	a	h	b	h	b	h	h	b	h	h	a	h	a	h	b	h	h	h	h	b	h	b	h	h	a	h	h
Block77831	Chr.8	19994687	20002468	b	h	h	h	h	a	b	a	a	h	b	b	h	a	a	a	h	b	h	a	h	b	h	b	h	h	b	h	h	a	h	a	a	b	h	h	h	h	b	h	b	h	h	a	h	a
Block77834	Chr.8	20006874	20013400	b	h	h	h	h	a	b	a	a	h	b	b	h	a	a	a	h	b	h	a	h	b	h	b	h	h	b	h	h	a	h	a	a	b	h	h	h	h	b	h	b	h	h	a	h	a
Block77835	Chr.8	20013906	20019031	b	h	h	h	h	a	b	a	a	h	b	b	h	a	a	a	h	b	h	a	h	b	h	b	h	h	b	h	h	a	h	a	h	b	h	a	h	h	b	h	b	h	a	a	h	a
Block77840	Chr.8	20027934	20038898	b	h	h	h	h	a	b	a	a	h	b	b	h	a	a	a	h	b	h	a	h	b	h	b	h	h	b	h	h	a	h	a	h	b	h	a	h	h	b	h	b	h	a	a	h	a
Block77841	Chr.8	20038998	20045382	b	h	h	h	h	a	b	a	a	h	b	b	h	a	a	a	h	b	h	a	h	b	h	b	h	h	b	h	h	a	h	a	h	b	h	h	h	h	b	h	b	h	h	a	h	h
Block77846	Chr.8	20053348	20058772	b	h	h	h	h	a	b	a	a	h	b	b	h	a	a	a	h	b	h	a	h	b	h	b	h	h	b	h	h	a	h	a	h	b	h	h	h	h	b	h	b	h	h	a	h	h
Block77847	Chr.8	20058824	20078941	b	h	h	h	h	a	b	a	a	h	b	b	h	a	a	a	h	b	h	a	h	b	h	b	h	h	b	h	h	a	h	a	a	b	h	h	a	h	b	h	b	h	h	a	h	h
Block77849	Chr.8	20083485	20090461	b	h	h	h	h	a	b	a	a	h	b	b	h	a	a	a	h	b	h	a	h	b	h	b	h	h	b	h	h	a	h	a	a	b	h	h	a	h	b	h	b	h	h	a	h	h
Block77850	Chr.8	20090752	20107568	b	h	h	h	h	a	b	a	a	h	b	b	h	a	a	a	h	b	h	a	h	b	h	b	h	h	b	h	h	a	h	a	h	b	h	h	a	h	b	h	b	h	h	a	h	h
Block77851	Chr.8	20107910	20119320	b	h	h	h	h	a	b	a	a	h	b	b	h	a	a	a	h	b	h	a	h	b	h	b	h	h	b	h	h	a	h	a	h	b	h	h	a	h	b	h	b	h	h	a	h	h
Block77852	Chr.8	20120074	20127100	b	h	h	h	h	a	b	a	a	h	b	b	h	a	a	a	h	b	h	a	h	b	h	b	h	h	b	h	h	a	h	a	h	b	h	h	h	h	b	h	b	h	h	a	h	h
Block77855	Chr.8	20130484	20138696	b	h	h	h	h	a	b	a	a	h	b	b	h	a	a	a	h	b	h	a	h	b	h	b	h	h	b	h	h	a	a	a	h	b	h	h	h	h	b	h	b	h	h	a	h	h
Block77869	Chr.8	20161214	20166333	b	a	h	a	h	a	b	a	a	h	b	b	h	a	a	a	h	b	h	a	h	b	h	b	h	h	b	h	h	a	h	a	h	b	h	h	h	h	b	h	b	h	h	a	h	h
Block77877	Chr.8	20184269	20190421	b	h	h	h	h	a	b	a	a	h	b	b	h	a	a	a	h	b	h	a	h	b	h	b	h	h	b	h	h	a	h	a	h	b	h	h	h	h	b	h	b	h	h	a	h	h
Block77879	Chr.8	20191521	20202747	b	h	h	h	h	a	b	a	a	h	b	b	h	a	a	a	h	b	h	a	h	b	h	b	h	h	b	h	h	a	h	a	h	b	h	h	h	h	b	h	b	h	h	a	h	h
Block77881	Chr.8	20206889	20217449	b	h	h	h	h	a	b	a	a	h	b	b	h	a	a	a	h	b	h	a	h	b	h	b	h	h	b	h	h	a	h	a	h	b	h	h	h	h	b	h	b	h	h	a	h	h
Block77882	Chr.8	20217908	20229954	b	h	h	h	h	a	b	a	a	h	b	b	h	a	a	a	h	b	h	a	h	b	h	b	h	h	b	h	h	a	h	a	h	b	h	h	h	h	b	h	b	h	h	a	h	h
Block77883	Chr.8	20230028	20235084	b	h	h	h	h	a	b	a	a	h	b	b	h	a	a	a	h	b	h	a	h	b	h	b	h	h	b	h	h	a	h	a	h	b	h	h	h	h	b	h	b	h	h	a	h	h
Block77887	Chr.8	20249516	20257520	b	h	h	h	h	a	b	a	a	h	b	b	h	a	a	a	h	b	h	a	h	b	h	b	h	h	b	h	h	a	h	a	h	b	h	h	a	h	b	h	b	h	h	a	h	h
Block77890	Chr.8	20259950	20275542	b	h	h	h	h	a	b	a	a	h	b	b	h	a	a	a	h	b	h	a	h	b	h	b	h	h	b	h	h	a	h	a	h	b	h	h	a	h	b	h	b	h	h	a	h	h
Block77892	Chr.8	20278947	20284594	b	h	h	h	h	a	b	a	a	h	b	b	h	a	a	a	h	b	h	a	h	b	h	b	h	h	b	h	h	a	h	a	h	b	h	h	h	h	b	h	b	h	h	a	h	h
Block77895	Chr.8	20291076	20296745	b	h	h	h	h	a	b	a	a	h	b	b	h	a	a	a	h	b	h	a	h	b	h	b	h	h	b	h	h	a	h	a	h	b	h	h	h	h	b	h	b	h	h	a	h	h
Block77896	Chr.8	20297486	20313158	b	h	h	h	h	a	b	a	a	h	b	b	h	a	a	a	h	b	h	a	h	b	h	b	h	h	b	h	h	a	h	a	h	b	h	h	h	h	b	h	b	h	h	a	h	h
Block77898	Chr.8	20314418	20335718	b	h	h	h	h	a	b	a	a	h	b	b	h	a	a	a	h	b	h	a	h	b	h	b	a	h	b	h	h	a	h	a	h	b	h	h	h	h	b	h	b	h	h	a	h	h
Block77899	Chr.8	20336219	20342103	b	h	h	h	h	a	b	a	a	h	b	b	h	a	a	a	h	b	h	a	h	b	h	b	a	h	b	h	h	a	h	a	h	b	h	h	h	h	b	h	b	h	a	a	h	h
Block77900	Chr.8	20342279	20353664	b	h	h	h	h	a	b	a	a	h	b	b	h	a	a	a	h	b	h	a	h	b	h	b	h	h	b	h	h	a	h	a	h	b	h	h	h	h	b	h	b	h	a	a	a	h
Block77902	Chr.8	20353969	20366796	b	h	h	h	h	a	b	a	a	h	b	b	h	a	a	a	h	b	h	a	h	b	h	b	h	h	b	h	h	a	h	a	h	b	h	h	h	h	b	h	b	h	a	a	h	h
Block77904	Chr.8	20371473	20380348	b	h	h	h	h	a	b	a	a	h	b	b	h	a	a	a	h	b	h	a	h	b	h	b	h	h	b	h	h	a	h	a	h	b	h	h	h	h	b	h	b	h	h	a	h	h
Block77905	Chr.8	20380608	20396162	b	h	h	h	h	a	b	a	a	h	b	b	h	a	a	a	h	b	h	a	h	b	h	b	h	h	b	h	a	a	h	a	h	b	h	h	h	h	b	h	b	h	h	a	h	h
Block77909	Chr.8	20399599	20410918	b	h	h	h	h	a	b	a	a	h	b	b	h	a	a	a	h	b	h	a	h	b	h	b	h	h	b	h	a	a	h	a	h	b	h	a	h	h	b	a	b	h	h	a	h	h
Block77915	Chr.8	20424441	20435355	b	h	h	h	h	a	b	a	a	h	b	b	h	a	a	a	h	b	h	a	h	b	h	b	h	h	b	h	a	a	h	a	h	b	h	a	h	h	b	a	b	h	h	a	h	h
Block77916	Chr.8	20435402	20443030	b	h	h	h	h	a	b	a	a	h	b	b	h	a	a	a	h	b	h	a	h	b	h	b	h	h	b	h	a	a	h	a	h	b	h	a	h	h	b	h	b	h	h	a	h	h
Block77917	Chr.8	20443043	20448406	b	h	h	h	h	a	b	a	a	h	b	b	h	a	a	a	h	b	a	a	h	b	h	b	h	a	b	h	h	a	h	a	h	b	h	h	h	h	b	h	b	h	h	a	h	h
Block77923	Chr.8	20465633	20479767	b	h	h	h	h	a	b	a	a	h	b	b	h	a	a	a	h	b	a	a	h	b	h	b	h	h	b	h	h	a	h	a	h	b	h	h	h	h	b	h	b	h	h	a	h	h
Block77924	Chr.8	20480777	20492608	b	h	h	h	h	a	b	a	a	h	b	b	h	a	a	a	h	b	h	a	h	b	h	b	h	h	b	h	h	a	h	a	h	b	h	a	h	h	b	h	b	h	a	a	h	h
Block77928	Chr.8	20495513	20505600	b	h	h	h	h	a	b	a	a	h	b	b	h	a	a	a	h	b	h	a	h	b	h	b	h	h	b	h	h	a	h	a	a	b	h	h	h	h	b	h	b	h	h	a	h	h
Block77932	Chr.8	20510332	20518127	b	h	h	h	h	a	b	a	a	h	b	b	h	a	a	a	h	b	h	a	h	b	h	b	h	h	b	h	h	a	h	a	a	b	h	h	h	h	b	h	b	h	h	a	h	h
Block77934	Chr.8	20523835	20540372	b	h	h	h	h	a	b	a	a	h	b	b	h	a	a	a	h	b	h	a	h	b	h	b	h	h	b	h	h	a	h	a	h	b	h	h	h	h	b	h	b	h	h	a	h	h
Block77935	Chr.8	20541619	20571227	b	h	h	h	h	a	b	a	a	h	b	b	h	a	a	a	h	b	h	a	h	b	a	b	h	h	b	h	h	a	h	a	h	b	h	h	h	h	b	h	b	h	h	a	h	h
Block77936	Chr.8	20571405	20579787	b	h	h	h	h	a	b	a	a	h	b	b	h	a	a	a	h	b	h	a	h	b	a	b	h	h	b	h	h	a	h	a	h	b	h	h	h	h	b	h	b	h	h	a	h	h
Block77938	Chr.8	20583958	20617151	b	h	h	h	h	a	b	a	a	h	b	b	h	a	a	a	h	b	h	a	h	b	h	b	h	h	b	h	h	a	h	a	h	b	h	h	h	h	b	h	b	h	h	a	h	h
Block77940	Chr.8	20617596	20635614	b	h	h	h	h	a	b	a	a	h	b	b	h	a	a	a	h	b	h	a	h	b	h	b	h	h	b	h	h	a	h	a	h	b	h	h	h	h	b	h	b	h	h	a	h	h
Block77942	Chr.8	20638213	20660348	b	h	h	h	h	a	b	a	a	h	b	b	h	a	a	a	h	b	h	a	h	b	h	b	h	h	b	h	h	a	h	a	h	b	h	h	h	h	b	h	b	h	h	a	h	h
Block77947	Chr.8	20663501	20668667	b	h	h	h	h	a	b	a	a	h	b	b	h	a	a	a	h	b	a	a	h	b	h	h	h	h	b	h	h	a	h	a	a	b	h	a	a	h	b	a	b	a	h	a	a	h
Block77960	Chr.8	20684060	20690247	b	h	h	h	h	a	b	a	a	h	b	b	h	a	a	a	h	b	a	a	h	b	h	h	h	h	b	h	h	a	h	a	a	b	h	a	a	h	b	a	b	a	h	a	a	h
Block77962	Chr.8	20692491	20699981	b	h	h	h	h	a	b	a	a	h	b	b	h	a	a	a	h	b	h	a	a	b	h	b	h	h	b	a	h	a	h	a	h	b	h	h	h	h	b	h	b	h	h	a	h	h
Block77979	Chr.8	20727027	20735934	b	h	h	h	a	a	b	a	a	h	b	b	h	a	a	a	h	b	h	a	a	b	h	b	h	h	b	a	h	a	h	a	h	b	h	h	h	h	b	h	b	h	h	a	h	h
Block77980	Chr.8	20736076	20752927	b	h	h	h	h	a	b	a	a	h	b	b	h	a	a	a	h	b	h	a	a	b	h	b	h	h	b	h	h	a	h	a	h	b	h	h	h	h	b	h	b	h	h	a	h	h
Block77983	Chr.8	20758435	20764349	b	h	h	h	h	a	b	a	a	h	b	b	h	a	a	a	h	b	h	a	a	b	h	b	h	h	b	h	h	a	h	a	h	b	h	h	h	h	b	h	b	h	h	a	h	h
Block77985	Chr.8	20767181	20778221	b	h	h	h	h	a	b	a	a	h	b	b	h	a	a	a	h	b	h	a	h	b	h	b	h	h	b	h	h	a	h	a	h	b	h	h	h	h	b	h	b	h	h	a	a	h
Block77992	Chr.8	20790897	20797400	b	h	h	h	h	a	b	a	a	h	b	b	h	a	a	a	h	b	h	a	h	b	h	b	h	h	b	h	h	a	h	a	h	b	h	h	h	h	b	h	b	h	h	a	a	h
Block77993	Chr.8	20797546	20803143	b	h	h	h	h	a	b	a	a	a	b	b	h	a	a	a	h	b	h	a	h	b	h	b	h	h	b	h	h	a	h	a	h	b	h	h	h	h	b	a	b	h	h	a	a	h
Block78000	Chr.8	20819207	20825198	b	h	h	h	h	a	b	a	a	a	b	b	h	a	a	a	h	b	h	a	h	b	h	b	h	h	b	h	h	a	h	a	h	b	h	h	h	h	b	a	b	h	h	a	h	h
Block78001	Chr.8	20825364	20832153	b	h	h	h	h	a	b	a	a	a	b	b	h	a	a	a	h	b	h	a	h	b	h	b	h	h	b	h	h	a	h	a	h	b	h	h	h	h	b	h	b	h	h	a	h	h
Block78004	Chr.8	20837317	20846511	b	h	h	h	h	a	b	a	a	h	b	b	h	a	a	a	h	b	h	a	h	b	h	b	h	h	b	h	h	a	h	a	h	b	h	h	h	h	b	h	b	h	h	a	h	h
Block78005	Chr.8	20846789	20854741	b	h	h	h	h	a	b	a	a	h	b	b	h	a	a	a	h	b	h	a	h	b	h	b	h	h	b	a	h	a	h	a	h	b	h	h	h	h	b	h	b	h	h	a	h	h
Block78007	Chr.8	20859803	20867611	b	a	h	h	h	a	b	a	a	h	b	b	h	a	a	a	h	b	h	a	h	b	h	b	h	h	b	a	h	a	h	a	h	b	h	h	h	h	b	h	b	h	h	a	h	h
Block78008	Chr.8	20867657	20877307	b	a	h	h	h	a	b	a	a	h	b	b	h	a	a	a	h	b	h	a	h	b	h	b	h	h	b	h	h	a	h	a	h	b	h	h	h	h	b	h	b	h	h	a	h	h
Block78010	Chr.8	20877630	20888399	b	h	h	h	h	a	b	a	a	h	b	b	h	a	a	a	h	b	h	a	h	b	h	b	h	h	b	h	h	a	h	a	h	b	h	h	h	h	b	h	b	h	h	a	h	h
Block78021	Chr.8	20914572	20922675	b	h	h	h	h	a	b	a	a	h	b	b	h	a	a	a	h	b	h	a	h	b	h	b	h	h	b	h	h	a	h	a	h	b	h	h	h	h	b	h	b	h	h	a	h	h
Block78025	Chr.8	20925989	20935462	b	h	h	a	h	a	b	a	a	h	b	b	h	a	a	a	h	b	h	a	h	b	h	b	h	h	b	h	h	a	h	a	h	b	h	h	h	h	b	h	b	h	h	a	h	h
Block78027	Chr.8	20937523	20944514	b	h	h	h	h	a	b	a	a	h	b	b	h	a	a	a	h	b	h	a	h	b	h	b	h	h	b	h	h	a	h	a	h	b	h	h	h	h	b	h	b	h	h	a	h	h
[truncated: 1,026 more rows]
[truncated: 136 more columns]
